# Supplementary material for: A regioselective one-pot aza-Friedel–Crafts reaction for primary, secondary and tertiary anilines using a heterogeneous catalyst
Source: Royal Society of Chemistry journal article supplement (doi:10.1039/c7gc02038d), 2017-01-01

## **Supplemental information**

This appendix contains Table 10 for E-factors comparison, the analytical data and the spectra of all synthesized pure products as well as two impure ones and the major side product which were encountered in some reactions i.e. the bis(indolyl)methane derivative obtained via the condensation of two aldehyde equivalents and indole. For each compound the spectra are in the following order:

1. IR spectrum
2. <sup>1</sup>H NMR spectrum
3. <sup>13</sup>C NMR spectrum
4. MS parent peak shown as a graph of % abundance against m/z (in some cases all MS spectrum was shown when obtained using a direct probe).
5. Table of MS daughter peaks (the RMM of each neutral parent peak was calculated using ACD/ChemSketch 2016.1.1)

The analytical data is found beneath each respective spectrum. With regards to the *J* constants, these are always given as values with two decimal places because of the proximity of some peaks.

The E-factors in the table were calculated for some selected studies involving homogeneous and heterogeneous catalysts. None of these studies actually calculated and gave the E-factor values for their model reactions i.e. all values were calculated as per method reported in our paper. The reaction which was used for the calculation involved 4-methylbenzaldehyde (or benzaldehyde in cases when 4-methylbenzaldehyde was not used), indole and *N*-methylaniline i.e. the reactants used in our model reaction.

Table 10. E-factors comparison with different reported synthetic procedures

|                                                                            | Examples of heterogeneous catalysts                                                              |                                                                                                                    |                                                                                     |                                                                                                              |                                                                                        | Examples of homogeneous catalysts                                                                                         |                                                                                          |
|----------------------------------------------------------------------------|--------------------------------------------------------------------------------------------------|--------------------------------------------------------------------------------------------------------------------|-------------------------------------------------------------------------------------|--------------------------------------------------------------------------------------------------------------|----------------------------------------------------------------------------------------|---------------------------------------------------------------------------------------------------------------------------|------------------------------------------------------------------------------------------|
|                                                                            | PMA-SiO <sub>2</sub> – neat <sup>7</sup>                                                         | RGO/ZnO in H <sub>2</sub> O <sup>19</sup>                                                                          | Magnetite – neat <sup>18</sup>                                                      | PANI-HBF <sub>4</sub> – neat <sup>16</sup>                                                                   | Our catalyst                                                                           | BDMS in ethanol <sup>12</sup> solvent                                                                                     | SDS in water <sup>15</sup>                                                               |
| Mass of reactants and solvents(g)                                          | 0.452 (1 mmol indole, 1 mmol 4-methylbenzaldehyde, 2 mmol <i>N</i> -methylaniline)               | 1.830 (1 mmol indole, 1 mmol benzaldehyde, 1 mmol <i>N</i> -methylaniline), 1.5 mL water solvent (during reaction) | 0.344 (1 mmol indole, 1 mmol 4-methylbenzaldehyde, 1 mmol <i>N</i> -methylaniline)  | 0.377 (1 mmol indole, 1 mmol aldehyde, 1.3 mmol <i>N</i> -methylaniline)                                     | 1.428 (2.5 mmol indole, 2.5 mmol 4-methylbenzaldehyde, 5 mmol <i>N</i> -methylaniline) | 1.241 (1 mmol indole, 1 mmol 4-methylbenzaldehyde, 2 mmol <i>N</i> -methylaniline, 1 mL ethanol)solvent (during reaction) | 2.352 (1 mmol indole, 1 mmol benzaldehyde, 1.2 mmol <i>N</i> -methylaniline, 2 mL water) |
| Mass of catalyst (g)                                                       | 0.910 (5 mol% of 10 wt% PMA/SiO <sub>2</sub> )                                                   | 0.017 (5 wt% wrt reactants)                                                                                        | 0.023 (10 mol%)                                                                     | 0.006 (5wt% wrt aldehyde)                                                                                    | 0.300                                                                                  | 0.022 (10 mol%)                                                                                                           | 0.058 (20 mol%)                                                                          |
| Mass of product (g)                                                        | 0.304 (93% yield)                                                                                | 0.283 (90% yield)                                                                                                  | 0.284 (87% yield)                                                                   | 0.307 (94% yield)                                                                                            | 0.750 (92% yield)                                                                      | 0.280 (86% yield)                                                                                                         | 0.296 (94% yield)                                                                        |
| Mass of waste (g) = mass of reactants + mass of catalyst – mass of product | 1.058                                                                                            | 1.547                                                                                                              | 0.060                                                                               | 0.070                                                                                                        | 0.378                                                                                  | 0.983                                                                                                                     | 2.114                                                                                    |
| Mass of recovered catalyst (g)                                             | No recyclability or recoverability studies were performed (hence we cannot assume full recovery) | 0.017 (complete recovery assumed because of no loss in activity)                                                   | 0.023 (complete recovery assumed, although no comments on recovered mass were made) | 0.006 (complete recovery assumed due to no yield decrease, although no comments on recovered mass were made) | 0.300 (complete recovery, proven by weight measurements and AAS analysis)              | 0 (not recovered)                                                                                                         | 0 (not recovered)                                                                        |
| E-factor (Mass of waste <i>excluding mass of catalyst if</i>               | <b>3.485</b>                                                                                     | <b>5.410 (considering that water is</b>                                                                            | <b>0.213</b>                                                                        | <b>0.227</b>                                                                                                 | <b>0.504</b>                                                                           | <b>3.512</b>                                                                                                              | <b>7.152</b>                                                                             |

|                                        |  |                                                 |  |  |  |  |  |  |
|----------------------------------------|--|-------------------------------------------------|--|--|--|--|--|--|
| <i>recovered</i> )/mass<br>of product) |  | <b>used as a non-<br/>reusable<br/>solvent)</b> |  |  |  |  |  |  |
|----------------------------------------|--|-------------------------------------------------|--|--|--|--|--|--|

## Analytical data

**(6a) 4-[1H-indol-3-yl(phenyl)methyl]-N-methylaniline.** C<sub>22</sub>H<sub>20</sub>N<sub>2</sub>. Brown solid. M.P.: 128 °C. (Hexane/EtOAc 8.5:1.5) IR (KBr, cm<sup>-1</sup>): 3402 (w), 3363 (m), 3201 (m), 3163 (m), 3101 (m), 3080 (m), 3055 (m), 3022 (m), 2920 (m), 2864 (m), 1612 (m), 1516 (s), 1490 (s), 1452 (s), 1340 (m), 1309 (m), 1247 (m), 1219 (m), 1182 (w), 1145 (w), 1103 (m), 1055 (m), 1008 (m), 914 (w), 871 (w), 842 (m), 806 (m), 790 (m), 742 (s), 698 (s). <sup>1</sup>H NMR (500 MHz, CDCl<sub>3</sub>) δ = 7.95 (br s, 1 H), 7.37 (d, *J* = 8.2 Hz, 1 H), 7.32 - 7.15 (m, 7 H), 7.07 (d, *J* = 8.5 Hz, 2 H), 7.00 (ddd, *J* = 8.2, 7.2, 0.9 Hz, 1 H), 6.61 (dd, *J* = 1.1, 2.3 Hz, 1 H), 6.57 (d, *J* = 8.5 Hz, 2 H), 5.60 (s, 1 H), 2.84 (s, 3 H). <sup>13</sup>C NMR (126 MHz, CDCl<sub>3</sub>) δ = 147.59, 144.72, 136.71, 132.94, 129.69, 128.92, 128.15, 127.08, 125.94, 123.96, 121.91, 120.55, 120.04, 119.22, 112.40, 110.97, 47.95, 30.89. MS(ES<sup>+</sup>): *m/z* = 313.11[M+H]<sup>+</sup>, 298.09, 22.08, 204.10, 196.10, 180.10.

**(6b) 4-[1H-indol-3-yl(4-methylphenyl)methyl]-N-methylaniline.** C<sub>23</sub>H<sub>22</sub>N<sub>2</sub>. Brown solid. M.P.: 160 °C. (Hexane/EtOAc 8.5:1.5). IR (KBr, cm<sup>-1</sup>): 3419 (w), 3375 (w), 3212 (w), 3186 (w), 3059 (w), 3039 (w), 3018 (w), 2997 (w), 2993 (w), 2941 (w), 2918 (w), 2862 (w), 2814 (w), 1683 (m), 1652 (m), 1616 (m), 1516 (s), 1506 (s), 1456 (m), 1338 (w), 1307 (w), 1219 (w), 1178 (w), 1147 (w), 1093 (w), 1008 (m), 808 (m), 792 (w), 769 (w), 738 (s). <sup>1</sup>H NMR (500 MHz, CDCl<sub>3</sub>) δ = 7.91 (br s, 1 H), 7.33 (d, *J* = 8.2 Hz, 1 H), 7.25 (d, *J* = 7.9 Hz, 1 H), 7.14 (ddd, *J* = 0.9, 7.0, 7.9 Hz, 1H), 7.11 (d, *J* = 7.9 Hz, 2H), 7.06 (d, *J* = 7.9 Hz, 2H), 7.03 (d, *J* = 8.5 Hz, 2H), 6.97 (ddd, *J* = 0.9, 7.0, 8.2 Hz, 1 H), 6.58 (dd, *J* = 0.9, 2.4 Hz, 1H), 6.54 (d, *J* = 8.5 Hz, 2H), 5.53 (s, 1 H), 2.81 (s, 3 H), 2.31 (s, 3 H). <sup>13</sup>C NMR (126 MHz, CDCl<sub>3</sub>) δ = 147.53, 141.73, 136.69, 135.31, 133.19, 129.64, 128.85, 128.77, 127.10, 123.89, 121.86, 120.71, 120.06, 119.19, 112.38, 110.94, 47.52, 30.89, 21.02. MS(ES<sup>+</sup>): *m/z* = 327.15[M+H]<sup>+</sup>, 312.06, 297.04, 220.88, 210.15, 204.03.

**(6c) 4-[1H-indol-3-yl(3-methylphenyl)methyl]-N-methylaniline.** C<sub>23</sub>H<sub>22</sub>N<sub>2</sub>. Brown solid. M.P.: 65 °C. (Hexane/EtOAc 8.5:1.5). IR (KBr, cm<sup>-1</sup>): 3417 (m), 3379 (m), 3234 (br, m), 3101 (m), 3074 (m), 3059 (m), 3037 (m), 3018 (m), 2997 (m), 2985 (m), 2943 (m), 2910 (m), 2883 (m), 2866 (m), 1614 (m), 1519 (s), 1485 (m), 1456 (s), 1398 (m), 1338 (m), 1311 (m), 1253 (m), 1217 (m), 1178 (m), 1149 (m), 1097 (m), 1074 (m), 1014 (m), 840 (w), 804 (s), 788 (m), 775 (m), 742 (s), 667 (w), 615 (w), 597 (w). <sup>1</sup>H NMR (500 MHz, CDCl<sub>3</sub>) δ = 7.90 (br s, 1 H), 7.33 (d, *J* = 8.2 Hz, 1 H), 7.26 (d, *J* = 7.9 Hz, 1 H), 7.17 - 7.12 (m, 2 H), 7.06 (s, 1 H), 7.04 (d, *J* = 8.5 Hz, 2 H), 7.02 - 6.95 (m, 3 H), 6.58 (dd, *J* = 1.1, 2.3 Hz, 1 H), 6.53 (d, *J* = 8.5 Hz, 2 H), 5.52 (s, 1 H), 3.61 (br s, 1 H), 2.81 (s, 3 H), 2.28 (s, 3 H). <sup>13</sup>C NMR (126 MHz, CDCl<sub>3</sub>) δ = 147.64, 144.72, 137.68, 136.76, 133.11, 129.75, 128.09, 127.21, 126.82, 126.04, 124.01, 121.95, 120.71, 120.13, 119.28, 112.44, 112.35, 111.01, 47.98, 30.95, 21.58. MS(ES<sup>+</sup>): *m/z* = 327.15[M+H]<sup>+</sup>, 312.06, 297.04, 220.88, 210.15, 204.03.

**(6d) 4-[1H-indol-3-yl(2-nitrophenyl)methyl]-N-methylaniline.** C<sub>22</sub>H<sub>19</sub>N<sub>3</sub>O<sub>2</sub>. Orange solid. M.P.: 71 °C. (Hexane/EtOAc 7:3). IR (KBr, cm<sup>-1</sup>): 3412 (br, m), 3055 (w), 3010 (w), 2981 (w), 2924 (w), 2877 (w), 2812 (w), 1716 (w), 1614 (m), 1519 (s), 1506 (s), 1456 (m), 1350 (m), 1338 (m), 1317 (w), 1267 (w), 1255 (w), 1219 (w), 1182 (w), 1153 (w), 1093 (w), 1008 (w), 842 (w), 806 (w), 781 (w), 742 (m), 684 (w). <sup>1</sup>H NMR (500 MHz, CDCl<sub>3</sub>) δ = 7.97 (br s, 1 H), 7.82 (dd, *J* = 1.2, 7.9 Hz, 1 H), 7.41 (td, *J* = 1.2, 7.6 Hz, 1 H), 7.36 - 7.32 (m, 2 H), 7.30 (td, *J* = 1.2, 7.6 Hz, 1 H), 7.22 (d, *J* = 7.9 Hz, 1 H), 7.16 (ddd, *J* = 1.1, 7.0, 7.9 Hz, 1 H), 7.04 - 6.98 (m, 3H), 6.57 (dd, *J* = 0.9, 2.1 Hz, 1 H), 6.54 (d, *J* = 8.5 Hz, 2 H), 6.29 (s, 1 H), 3.66 (br s, 1 H), 2.81 (s, 3 H). <sup>13</sup>C NMR (126 MHz, CDCl<sub>3</sub>) δ = 149.74, 147.95, 138.68, 136.75, 132.24, 131.35, 130.48, 130.14, 129.78, 127.03, 126.71, 124.33, 124.28, 122.22, 119.67, 119.52, 112.40, 111.12, 42.35, 30.75. MS(ES<sup>+</sup>): *m/z* = 358.07[M+H]<sup>+</sup>, 324.07, 241.09, 205.12, 122.01.

**(6e) 4-[1H-indol-3-yl(3-nitrophenyl)methyl]-N-methylaniline.** C<sub>22</sub>H<sub>19</sub>N<sub>3</sub>O<sub>2</sub>. Orange solid. M.P.: 64 °C. (Hexane/EtOAc 7:3). IR (KBr, cm<sup>-1</sup>): 3410 (br, m), 3055 (w), 3012 (w), 2980 (w), 2927 (w), 2877 (w), 2816 (w), 1728 (w), 1614 (m), 1525 (s), 1506 (s), 1456 (s), 1348 (s), 1332 (m), 1246 (m), 1217 (w), 1178 (w), 1151 (w), 1093 (w), 1043 (w), 1008 (w), 923 (w), 904 (w), 837 (m), 806 (m), 742 (m), 731 (m), 688 (w). <sup>1</sup>H NMR (500 MHz, CDCl<sub>3</sub>) δ = 8.11 (t, *J* = 2.1 Hz, 1 H), 8.05 (ddd, *J* = 0.9, 2.1, 8.3 Hz, 1 H), 8.02 (br s, 1 H), 7.57 (d, *J* = 7.6 Hz, 1 H), 7.42 (t, *J* = 7.9 Hz, 1 H), 7.36 (d, *J* = 8.1 Hz, 1 H), 7.21 - 7.15 (m, 2 H), 7.04 - 6.97 (m, 3 H), 6.60 (dd, *J* = 1.2, 2.4 Hz, 1 H), 6.56 (d, *J* = 8.5 Hz, 2 H), 5.66 (s, 1 H), 3.68 (br, s, 1 H), 2.82 (s, 3 H). <sup>13</sup>C NMR (126 MHz, CDCl<sub>3</sub>) δ = 148.44, 148.13, 147.13, 136.85, 131.18, 130.02, 129.66, 126.69, 124.13, 123.77, 122.33, 121.33, 119.67, 119.59, 119.24, 112.59, 112.52, 111.30, 47.78, 30.82. MS(ES<sup>+</sup>): *m/z* = 358.13[M+H]<sup>+</sup>, 251.10, 241.09, 221.12, 204.20.

**(6f) 4-[1H-indol-3-yl(4-nitrophenyl)methyl]-N-methylaniline.** C<sub>22</sub>H<sub>19</sub>N<sub>3</sub>O<sub>2</sub>. Orange solid. M.P.: 63 °C. (Hexane/EtOAc 7:3). IR (KBr, cm<sup>-1</sup>): 3408 (br, m), 3101 (w), 3053 (w), 3014 (w), 2978 (w), 2931 (w), 2870 (w), 2816 (w), 1718 (m), 1612 (m), 1521 (s), 1506 (s), 1456 (m), 1344 (s), 1319 (m), 1244 (w), 1219 (w), 1184 (w), 1107 (w), 1045 (w), 1010 (w), 848 (w), 804 (m), 740 (m), 696 (w). <sup>1</sup>H NMR (500 MHz, CDCl<sub>3</sub>) δ = 8.11 (d, *J* = 8.8 Hz, 2 H), 8.02 (br s, 1 H), 7.43 - 7.33 (m, 3 H), 7.23 - 7.14 (m, 2 H), 7.04 - 6.95 (m, 3 H), 6.59 (dd, *J* = 0.9, 2.4 Hz, 1 H), 6.55 (d, *J* = 8.5 Hz, 2 H), 5.64 (s, 1 H), 3.67 (s, 1H), 2.82 (s, 3 H). <sup>13</sup>C NMR (126 MHz, CDCl<sub>3</sub>) δ = 152.78, 148.21, 146.39, 136.87, 130.11, 129.80, 129.75, 126.74, 124.26, 123.61, 122.35, 119.71, 119.61, 118.96, 112.63, 111.43, 48.02, 30.85. MS(ES<sup>+</sup>): *m/z* = 358.11[M+H]<sup>+</sup>, 343.04, 251.02, 221.11, 204.26.

**(6g) 4-[1H-indol-3-yl(2-methoxyphenyl)methyl]-N-methylaniline.** C<sub>23</sub>H<sub>22</sub>N<sub>2</sub>O. Brown solid. M.P.: 85 °C. (Hexane/EtOAc 7:3). IR (KBr, cm<sup>-1</sup>): 3412 (s), 3059 (m), 3003 (m), 2933 (w), 2897 (w), 2835 (w), 2812 (w), 1726 (w), 1614 (s), 1597 (s), 1517 (s), 1487 (s), 1456 (s), 1436 (m), 1338 (m), 1317 (m), 1269 (m), 1242 (s), 1217 (m), 1186 (m), 1105 (m), 1051 (m), 1022 (m), 931 (w), 815 (m), 748 (s). <sup>1</sup>H NMR (500 MHz, CDCl<sub>3</sub>) δ = 7.87 (br s, 1 H), 7.32 (d, *J* = 8.2 Hz, 1 H), 7.24 (d, *J* = 7.9 Hz, 1H), 7.19 - 7.10 (m, 2 H), 7.07 - 6.99 (m, 3 H), 6.96 (t, *J* = 7.6 Hz, 1 H), 6.89 (d, *J* = 6.9 Hz, 1 H), 6.81 (ddd, *J* = 0.9, 7.0, 8.2 Hz, 1 H), 6.57 (dd, *J* = 1.1, 2.3 Hz, 1 H), 6.52 (d, *J* = 8.5 Hz, 2 H), 5.98 (s, 3 H), 3.77 (s, 3 H). <sup>13</sup>C NMR (126 MHz, CDCl<sub>3</sub>) δ = 157.04, 147.33, 133.20, 133.11, 130.17, 129.91, 129.78, 127.28, 127.13, 124.01, 121.82, 120.47, 120.37, 120.14, 119.12, 112.46, 110.99, 110.72, 55.77, 40.26, 31.06. MS(ES<sup>+</sup>): *m/z* = 343.18[M+H]<sup>+</sup>, 328.10, 235.92, 226.12, 204.02.

**(6h) 4-[1H-indol-3-yl(3-methoxyphenyl)methyl]-N-methylaniline.** C<sub>23</sub>H<sub>22</sub>N<sub>2</sub>O. Brown solid. M.P.: 124 °C. (Hexane/EtOAc 7:3). IR (KBr, cm<sup>-1</sup>): 3406 (m), 3367 (s), 3169 (s), 3103 (s), 3084 (s), 3034 (s), 3003 (s), 2983 (s), 2958 (s), 2937 (s), 2922 (s), 2866 (s), 2833 (w), 1683 (w), 1604 (s), 1581 (s), 1539 (w), 1516 (s), 1506 (s), 1487 (s), 1456 (s), 1448 (s), 1433 (s), 1355 (m), 1338 (m), 1298 (m), 1263 (s), 1219 (m), 1139 (m), 1099 (m), 1045

(s), 1008 (m), 933 (m), 916 (m), 879 (m), 839 (m), 819 (m), 779 (s), 767 (s), 744 (s), 698 (s), 615 (m). <sup>1</sup>H NMR (500 MHz, CDCl<sub>3</sub>) δ = 7.91 (br s, 1 H), 7.33 (d, *J* = 8.2 Hz, 1 H), 7.26 (d, *J* = 7.9 Hz, 1 H), 7.22 - 7.11 (m, 2 H), 7.05 (d, *J* = 8.5 Hz, 2 H), 6.98 (ddd, *J* = 0.9, 7.0, 8.2 Hz, 1 H), 6.83 (d, *J* = 7.6 Hz, 1 H), 6.80 (t, *J* = 2.3 Hz, 1 H), 6.73 (ddd, *J* = 0.6, 2.3, 8.2 Hz, 1 H), 6.60 (d, *J* = 1.5 Hz, 1 H), 6.54 (d, *J* = 8.5 Hz, 2 H), 5.53 (s, 1 H), 3.72 (s, 3 H), 2.81 (s, 3 H). <sup>13</sup>C NMR (126 MHz, CDCl<sub>3</sub>) δ = 159.57, 147.70, 146.54, 136.76, 132.82, 129.71, 129.13, 127.16, 124.00, 121.96, 121.59, 120.41, 120.06, 119.30, 115.01, 112.48, 111.19, 111.05, 55.16, 48.06, 30.95. MS(ES+): *m/z* = 343.18[M+H]<sup>+</sup>, 328.10, 235.92, 226.12, 204.02.

**(6i) 4-[1H-indol-3-yl(4-methoxyphenyl)methyl]-N-methylaniline.** C<sub>23</sub>H<sub>22</sub>N<sub>2</sub>O. Brown solid. M.P.: 160 °C. (Hexane/EtOAc 7:3). IR (KBr, cm<sup>-1</sup>): 3404 (w), 3373 (w), 3207 (w), 3182 (w), 3059 (w), 3034 (w), 3012 (w), 2931 (w), 2900 (w), 2860 (w), 2833 (w), 2812 (w), 1734 (w), 1683 (w), 1652 (w), 1610 (m), 1516 (s), 1506 (s), 1456 (s), 1338 (w), 1311 (w), 1298 (w), 1246 (m), 1219 (m), 1174 (m), 1105 (w), 1031 (m), 1008 (w), 840 (w), 810 (m), 792 (m). <sup>1</sup>H NMR (500 MHz, CDCl<sub>3</sub>) δ = 7.92 (br s, 1 H), 7.34 (d, *J* = 8.2 Hz, 1 H), 7.24 (d, *J* = 7.9 Hz, 1 H), 7.17 - 7.11 (m, 3 H), 7.03 (d, *J* = 8.5 Hz, 2 H), 6.97 (ddd, *J* = 1.1, 7.1, 8.2 Hz, 1 H), 6.80 (d, *J* = 8.9 Hz, 2 H), 6.57 (dd, *J* = 0.9, 2.4 Hz, 1 H), 6.54 (d, *J* = 8.5 Hz, 2 H), 5.52 (s, 1 H), 3.77 (s, 3 H), 2.81 (s, 3 H). <sup>13</sup>C NMR (126 MHz, CDCl<sub>3</sub>) δ = 157.84, 147.63, 137.04, 136.80, 133.33, 129.88, 129.68, 127.14, 123.94, 121.95, 120.98, 120.15, 119.26, 113.59, 112.43, 111.03, 55.26, 47.15, 30.95. MS(ES+): *m/z* = 343.18[M+H]<sup>+</sup>, 328.10, 235.92, 226.12, 204.02.

**(6j) 4-[1H-indol-3-yl(2-hydroxyphenyl)methyl]-N-methylaniline.** C<sub>22</sub>H<sub>20</sub>N<sub>2</sub>O. Brown solid. M.P.: 69 °C. (Hexane/EtOAc 7:3). IR (KBr, cm<sup>-1</sup>): 3417 (br, m), 3057 (m), 3007 (m), 2981 (m), 2929 (m), 2904 (m), 2883 (m), 2814 (m), 1886 (w), 1732 (m), 1716 (m), 1614 (s), 1519 (s), 1506 (s), 1456 (s), 1417 (m), 1338 (m), 1265 (m), 1242 (m), 1219 (m), 1149 (m), 1091 (m), 1043 (m), 1010 (m), 937 (w), 875 (m), 829 (m), 794 (m), 748 (s), 704 (w), 667 (m), 611 (m). <sup>1</sup>H NMR (500 MHz, CDCl<sub>3</sub>) δ = 8.01 (br s, 1 H), 7.36 (d, *J* = 8.2 Hz, 1 H), 7.31 (d, *J* = 7.9 Hz, 1 H), 7.20 - 7.13 (m, 2 H), 7.08 (d, *J* = 8.5 Hz, 2 H), 7.03 - 6.96 (m, 2 H), 6.86 - 6.81 (m, 2 H), 6.70 (dd, *J* = 1.1, 2.3 Hz, 1 H), 6.57 (d, *J* = 8.5 Hz, 2 H), 5.68 (s, 1 H), 2.82 (s, 3 H). <sup>13</sup>C NMR (126 MHz, CDCl<sub>3</sub>) δ = 154.09, 147.88, 136.97, 131.48, 130.62, 130.20, 129.83, 127.82, 127.02, 124.23, 122.29, 120.70, 119.96, 119.56, 118.27, 116.36, 113.08, 111.42, 42.51, 31.05. MS(ES+): *m/z* = 329.16[M+H]<sup>+</sup>, 220.28, 212.10, 196.09, 180.94, 165.14

**(6k) 4-[1H-indol-3-yl(3-hydroxyphenyl)methyl]-N-methylaniline.** C<sub>22</sub>H<sub>20</sub>N<sub>2</sub>O. Brown solid. M.P.: 75 °C. (Hexane/EtOAc 7:3). IR (KBr, cm<sup>-1</sup>): 3410 (br, m), 3331 (br, m), 3053, 3012, 2976, 2877, 2812, 1716, 1705, 1683, 1614, 1521, 1487 (w), 1456, 1373 (m), 1338 (m), 1317 (m), 1263 (m), 1242 (m), 1219 (w), 1180 (m), 1145 (m), 1136 (m), 1093 (m), 1043 (m), 1008 (m), 999 (w), 950 (w), 931 (w), 873 (w), 835 (m), 771, 740, 696, 607 (w). <sup>1</sup>H NMR (500 MHz, CDCl<sub>3</sub>) δ = 7.92 (br s, 1 H), 7.33 (d, *J* = 7.9 Hz, 1 H), 7.25 (d, *J* = 7.9 Hz, 1 H), 7.17 - 7.09 (m, 2 H), 7.04 (d, *J* = 8.5 Hz, 2 H), 6.98 (ddd, *J* = 0.9, 7.0, 7.9 Hz, 1 H), 6.83 (d, *J* = 7.6 Hz, 1 H), 6.67 - 6.64 (m, 2 H), 6.60 (dd, *J* = 1.1, 2.3 Hz, 1 H), 6.54 (d, *J* = 8.5 Hz, 2 H), 5.51 (s, 1 H), 2.83 (s, 3 H). <sup>13</sup>C NMR (126 MHz, CDCl<sub>3</sub>) δ = 155.76, 147.50, 146.60, 136.68, 133.52, 129.70, 129.22, 127.10, 124.03, 121.74, 121.35, 120.03, 119.25, 116.38, 115.92, 113.02, 112.47, 111.01, 47.77, 30.95. MS(ES+): *m/z* = 329.16[M+H]<sup>+</sup>, 314.14, 221.20, 212.16, 204.16, 196.22.

**(6l) 4-[1H-indol-3-yl(4-hydroxyphenyl)methyl]-N-methylaniline.** C<sub>22</sub>H<sub>20</sub>N<sub>2</sub>O. Brown solid. M.P.: 80 °C. (Hexane/EtOAc 7:3, 6:4). IR (KBr, cm<sup>-1</sup>): 3406 (br, m), 3332 (m), 3053 (m), 3016 (m), 2980 (m), 2881 (m), 2810 (m), 1705 (m), 1612 (s), 1593 (m), 1510 (s), 1456 (s), 1417 (m), 1338 (m), 1240 (s), 1217 (s), 1170 (m), 1101 (m), 1043 (m), 1008 (m), 873 (w), 819 (m), 781 (m), 742 (s), 632 (w), 609 (w). <sup>1</sup>H NMR (500 MHz, CDCl<sub>3</sub>) δ = 7.91 (br s, 1 H), 7.33 (d, *J* = 8.2 Hz, 1 H), 7.24 (d, *J* = 7.9 Hz, 1 H), 7.14 (t, *J* = 7.9 Hz, 1 H), 7.08 (d, *J* = 8.2 Hz, 2 H), 7.03 (d, *J* = 8.5 Hz, 2 H), 6.97 (t, *J* = 7.5 Hz, 1 H), 6.70 (d, *J* = 8.5 Hz, 2 H), 6.59 - 6.52 (m, 3 H), 5.50 (s, 1 H), 2.81 (s, 3 H). <sup>1</sup>H NMR (500 MHz, CDCl<sub>3</sub>) δ = 7.91 (br s, 1 H), 7.33 (d, *J* = 8.2 Hz, 1 H), 7.24 (d, *J* = 7.9 Hz, 1 H), 7.14 (t, *J* = 7.9 Hz, 1 H), 7.08 (d, *J* = 8.2 Hz, 2 H), 7.03 (d, *J* = 8.5 Hz, 2 H), 6.97 (t, *J* = 7.5 Hz, 1 H), 6.70 (d, *J* = 8.5 Hz, 2 H), 6.59 - 6.52 (m, 3 H), 5.50 (s, 1 H), 2.81 (s, 3 H). <sup>13</sup>C NMR (126 MHz, CDCl<sub>3</sub>) δ = 153.82, 147.48, 136.71, 130.38, 129.99, 127.07, 123.89, 123.55, 121.92, 120.93, 119.98, 119.23, 114.99, 112.47, 111.02, 110.97, 47.09, 30.99. MS(ES+): *m/z* = 329.16[M+H]<sup>+</sup>, 314.14, 221.20, 212.10, 196.28.

**(6m) 4-[1H-indol-3-yl(2-hydroxy-5-nitrophenyl)methyl]-N-methylaniline.** C<sub>22</sub>H<sub>19</sub>N<sub>3</sub>O<sub>3</sub>. Orange-brown solid. M.P.: 101 °C. (Hexane/EtOAc 6:4). IR (KBr, cm<sup>-1</sup>): 3417 (br, m), 3331 (s), 3053 (s), 3014 (s), 2980 (s), 2924 (s), 2881 (s), 2808 (s), 1699 (m), 1614 (s), 1585 (s), 1519 (s), 1456 (s), 1373 (s), 1338 (s), 1284 (br, s), 1180 (m), 1153 (m), 1126 (m), 1076 (m), 1045 (m), 1010 (m), 945 (w), 916 (w), 840 (s), 821 (s), 744 (s), 640 (m). <sup>1</sup>H NMR (500 MHz, CDCl<sub>3</sub>) δ = 8.11 (br s, 1 H), 8.08 (dd, *J* = 3.1, 8.9 Hz, 1 H), 7.95 (d, *J* = 2.7 Hz, 1 H), 7.39 (d, *J* = 8.2 Hz, 1 H), 7.27 (d, *J* = 7.9 Hz, 1 H), 7.21 (t, *J* = 7.2 Hz, 1 H), 7.09 - 7.01 (m, 3 H), 6.73 (d, *J* = 1.5 Hz, 1 H), 6.62 - 6.55 (m, 3 H), 5.69 (s, 1 H), 2.83 (s, 3 H). <sup>13</sup>C NMR (126 MHz, CDCl<sub>3</sub>) δ = 148.21, 141.36, 136.96, 131.68, 129.91, 129.57, 126.58, 126.09, 124.12, 124.11, 122.53, 119.74, 119.41, 117.29, 116.28, 113.01, 111.46, 76.85, 42.03, 30.87. MS(ES+): *m/z* = 374.22[M+H]<sup>+</sup>, 364.38, 237.11, 108.27.

**(6n) 4-[1H-indol-3-yl(4-bromophenyl)methyl]-N-methylaniline.** C<sub>22</sub>H<sub>19</sub>BrN<sub>2</sub>. Brown solid. M.P.: 139 °C. (Hexane/EtOAc 8:2). IR (KBr, cm<sup>-1</sup>): 3416 (w), 3379 (m), 3226 (br, m), 3099 (m), 3074 (m), 3059 (m), 3037 (m), 3018 (m), 2997 (m), 2985 (m), 2937 (m), 2899 (m), 2883 (m), 2866 (m), 2814 (m), 1614 (m), 1519 (s), 1485 (s), 1456 (s), 1398 (w), 1338 (m), 1311 (m), 1263 (m), 1253 (m), 1217 (m), 1178 (m), 1147 (m), 1097 (m), 1074 (m), 1014 (s), 840 (w), 804 (s), 788 (s), 775 (s), 742 (s). <sup>1</sup>H NMR (500 MHz, CDCl<sub>3</sub>) δ = 7.94 (br s, 1 H), 7.37 (d, *J* = 8.5 Hz, 2 H), 7.34 (d, *J* = 8.2 Hz, 1 H), 7.21 (d, *J* = 7.9 Hz, 1 H), 7.16 (ddd, *J* = 1.1, 7.0, 7.9 Hz, 1 H), 7.10 (d, *J* = 8.2 Hz, 2 H), 7.02 - 6.96 (m, 3 H), 6.56 (dd, *J* = 1.1, 2.3 Hz, 1 H), 6.54 (d, *J* = 8.5 Hz, 2 H), 5.51 (s, 1 H), 3.63 (br s, 1 H), 2.81 (s, 3 H). <sup>13</sup>C NMR (126 MHz, CDCl<sub>3</sub>) δ = 147.86, 143.90, 136.79, 132.28, 131.31, 130.79, 130.09, 129.71, 126.95, 124.06, 122.16, 120.06, 120.00, 119.46, 112.50, 111.16, 47.49, 30.92. MS(ES+): *m/z* = 393.05[M+1+H]<sup>+</sup>, 377.99, 285.96, 276.08, 221.12, 204.02.

**(6o) 4-[1H-indol-3-yl(3,4-dichlorophenyl)methyl]-N-methylaniline.** C<sub>22</sub>H<sub>18</sub>Cl<sub>2</sub>N<sub>2</sub>. Brown solid. M.P.: 68 °C. (Hexane/EtOAc 8:2). IR (KBr, cm<sup>-1</sup>): 3410 (br, m), 3053 (w), 3014 (w), 2978 (w), 2927 (w), 2877 (w), 2812 (w), 1724 (w), 1612 (s), 1519 (s), 1467 (s), 1456 (s), 1444 (w), 1336 (w), 1317 (m), 1255 (m), 1217 (w), 1182 (w), 1149 (w), 1124 (w), 1093 (w), 1045 (w), 1028 (m), 1024 (w), 904 (w), 889 (w), 842 (w), 817 (m), 742 (s). <sup>1</sup>H NMR (500 MHz, CDCl<sub>3</sub>) δ = 7.97 (br s, 1 H), 7.38 (d, *J* = 8.2 Hz, 1 H), 7.31 (d, *J* = 8.2 Hz, 1 H), 7.31 (d, *J* = 1.8 Hz, 1 H), 7.21 (d, *J* = 7.9 Hz, 1 H), 7.17 (ddd, *J* = 0.9, 7.0, 7.9 Hz, 1 H), 7.06 (dd, *J* = 1.8 Hz, 8.2 Hz, 1 H), 7.06 - 7.01

(m, 3 H), 6.61 (dd,  $J = 0.9, 2.4$  Hz, 1 H), 6.55 (d,  $J = 8.5$  Hz, 2 H), 5.54 (s, 1 H), 3.66 (br s, 1H), 2.82 (s, 3 H).  $^{13}\text{C}$  NMR (126 MHz,  $\text{CDCl}_3$ )  $\delta = 147.91, 145.18, 136.68, 132.10, 131.51, 130.75, 130.05, 129.84, 129.56, 128.35, 126.70, 123.97, 122.17, 119.73, 119.47, 119.39, 112.45, 111.12, 47.17, 30.78$ . MS(ES+):  $m/z = 383.10[\text{M}+1+\text{H}]^+, 368.03, 276.01, 266.07, 221.12, 203.96$ .

**(6p) 4-[1H-indol-3-yl(2,4-dichlorophenyl)methyl]-N-methylaniline.**  $\text{C}_{22}\text{H}_{18}\text{Cl}_2\text{N}_2$ . Yellow solid. M.P.: 85 °C. (Hexane/EtOAc 8:2). IR (KBr,  $\text{cm}^{-1}$ ): 3417 (br, s), 3057 (w), 3005 (w), 2924 (w), 2897 (w), 2883 (w), 2814 (w), 1614 (m), 1556 (w), 1519 (s), 1506 (s), 1456 (s), 1435 (s), 1417 (m), 1338 (w), 1317 (w), 1265 (w), 1244 (w), 1217 (w), 1182 (w), 1147 (w), 1124 (w), 1095 (w), 1047 (w), 1010 (w), 848 (w), 837 (w), 813 (w), 759 (s), 744 (s), 667 (w).  $^1\text{H}$  NMR (500 MHz,  $\text{CDCl}_3$ )  $\delta = 7.98$  (br s, 1 H), 7.43 (d,  $J = 2.1$  Hz, 1 H), 7.37 (d,  $J = 8.2$  Hz, 1 H), 7.24 - 7.18 (m, 2 H), 7.11 (dd,  $J = 2.1, 8.2$  Hz, 1 H), 7.08 - 7.01 (m, 4 H), 6.61 - 6.56 (m, 3 H), 5.95 (s, 1 H), 2.85 (s, 3 H).  $^{13}\text{C}$  NMR (126 MHz,  $\text{CDCl}_3$ )  $\delta = 147.90, 140.76, 136.84, 134.81, 132.35, 131.45, 130.62, 129.85, 129.31, 126.88, 126.78, 124.29, 122.25, 119.77, 119.51, 119.14, 112.49, 111.19, 44.11, 30.89$ . MS(ES+):  $m/z = 383.07[\text{M}+1+\text{H}]^+, 366.07, 238.09, 214.09, 221.63, 221.12$ .

**(6q) 4-[1,3-benzodioxol-5-yl(1H-indol-3-yl)methyl]-N-methylaniline.**  $\text{C}_{23}\text{H}_{20}\text{N}_2\text{O}_2$ . Yellow solid. M.P.: 175 °C. (Hexane/EtOAc 7:3). IR (KBr,  $\text{cm}^{-1}$ ): 3412 (s), 3371 (m), 3217 (m), 3178 (m), 3101 (m), 3066 (m), 3034 (m), 2991 (m), 2943 (m), 2881 (m), 2858 (m), 2812 (m), 2781 (m), 1683 (s), 1616 (m), 1516 (s), 1498 (s), 1481 (s), 1456 (s), 1436 (s), 1367 (m), 1338 (m), 1311 (m), 1280 (m), 1255 (s), 1230 (s), 1176 (s), 1147 (w), 1116 (m), 1091 (m), 1035 (s), 1008 (m), 935 (s), 866 (w), 831 (m), 810 (m), 792 (s), 738 (s), 611 (w).  $^1\text{H}$  NMR (500 MHz,  $\text{CDCl}_3$ )  $\delta = 7.94$  (br s, 1 H), 7.36 (d,  $J = 8.0$  Hz, 1 H), 7.30 (d,  $J = 7.9$  Hz, 1 H), 7.18 (ddd,  $J = 0.9, 7.0, 7.9$  Hz, 1 H), 7.07 (d,  $J = 8.5$  Hz, 2 H), 7.02 (ddd,  $J = 0.9, 7.0, 7.9$  Hz, 1 H), 6.75 (s, 1 H), 6.73 (s, 2 H), 6.63 (dd,  $J = 1.1, 2.3$  Hz, 1 H), 6.58 (d,  $J = 8.5$  Hz, 2 H), 5.93 (d,  $J = 1.5$  Hz, 1H), 5.92 (d,  $J = 1.5$  Hz, 1H), 5.51 (s, 1 H), 3.64 (br s, 1 H), 2.84 (s, 3 H).  $^{13}\text{C}$  NMR (126 MHz,  $\text{CDCl}_3$ )  $\delta = 147.67, 147.46, 145.69, 138.83, 136.74, 132.96, 129.55, 127.04, 123.85, 121.97, 121.80, 120.68, 120.05, 119.28, 112.38, 110.97, 109.53, 107.91, 100.76, 47.64, 30.89$ . MS(ES+):  $m/z = 358.05[\text{M}+\text{H}]^+, 347.20, 250.02, 239.92$ .

**(6r) 4-[cyclohexyl(1H-indol-3-yl)methyl]-N-methylaniline.**  $\text{C}_{22}\text{H}_{26}\text{N}_2$ . Brown solid. M.P.: 70 °C. (Hexane/EtOAc 8:2; 7:3). IR (KBr,  $\text{cm}^{-1}$ ): 3417 (br, s), 3053 (m), 3012 (m), 2920 (s), 2846 (s), 2810 (m), 1683 (s), 1614 (s), 1519 (s), 1456 (s), 1417 (w), 1338 (m), 1315 (m), 1261 (m), 1220 (w), 1182 (w), 1149 (w), 1122 (w) 1095 (w), 1008 (w), 960 (w), 923 (w), 831 (w), 788 (w), 738 (s), 617 (w).  $^1\text{H}$  NMR (500 MHz,  $\text{CDCl}_3$ )  $\delta = 7.90$  (br s, 1H), 7.57 (d,  $J = 7.9$  Hz, 1 H), 7.29 (d,  $J = 7.9$  Hz, 1 H), 7.15 - 7.08 (m, 3 H), 7.06 (d,  $J = 2.4$  Hz, 1 H), 7.02 (t,  $J = 7.5$  Hz, 1 H), 6.51 (d,  $J = 8.5$  Hz, 2 H), 3.77 (d,  $J = 9.8$  Hz, 1 H), 2.77 (s, 3 H), 2.10 - 2.01 (m, 1 H), 1.85 (d,  $J = 11.9$  Hz, 1 H), 1.69 - 1.59 (m, 5 H), 1.28 - 1.23 (m, 1 H), 1.18 - 1.11 (m, 1 H), 1.00 - 0.89 (m, 2 H).  $^{13}\text{C}$  NMR (126 MHz,  $\text{CDCl}_3$ )  $\delta = 147.28, 136.25, 133.91, 129.11, 127.81, 121.67, 120.80, 120.26, 119.64, 119.06, 112.44, 110.98, 48.98, 42.69, 32.66, 32.16, 31.00, 26.77, 26.73$ . MS(ES+):  $m/z = 319.18[\text{M}+\text{H}]^+, 204.14, 130.07, 120.05, 77.06$ .

**(6s) 4-[1H-indol-3-yl(biphenyl-4-yl)methyl]-N-methylaniline.**  $\text{C}_{28}\text{H}_{24}\text{N}_2$ . Light brown solid. M.P.: 190 °C. (Hexane/EtOAc 8.5:1.5). IR (KBr,  $\text{cm}^{-1}$ ): 3417 (br, s), 3053 (m), 3012 (m), 2920 (s), 2846 (s), 2810 (m), 1683 (m), 1652 (m), 1614 (s), 1519 (s), 1485 (w), 1456 (s), 1417 (w), 1338 (m), 1315 (m), 1261 (m), 1220 (m), 1182 (m), 1149 (w), 1122 (w), 1095 (m), 1010 (w), 960 (w), 925 (w), 893 (w), 831 (m), 788 (m), 738 (s), 617 (w).  $^1\text{H}$  NMR (500 MHz,  $\text{CDCl}_3$ )  $\delta = 7.94$  (br s, 1 H), 7.62 - 7.54 (m, 2 H), 7.53 - 7.47 (m, 2 H), 7.44 - 7.38 (m, 2 H), 7.35 (d,  $J = 8.2$  Hz, 1 H), 7.33 - 7.26 (m, 4 H), 7.16 (ddd,  $J = 0.9, 7.0, 7.9$  Hz, 1 H), 7.08 (d,  $J = 8.5$  Hz, 2 H), 6.99 (ddd,  $J = 0.9, 7.1, 8.2$  Hz, 1 H), 6.64 (dd,  $J = 0.9, 2.1$  Hz, 1 H), 6.56 (d,  $J = 8.5$  Hz, 2 H), 5.60 (s, 1 H), 2.82 (s, 3 H).  $^{13}\text{C}$  NMR (126 MHz,  $\text{CDCl}_3$ )  $\delta = 147.72, 143.92, 141.12, 138.77, 136.77, 132.81, 129.74, 129.33, 128.71, 127.13, 127.00, 126.99, 126.91, 123.98, 122.03, 120.58, 120.13, 119.33, 112.43, 111.00, 47.67, 30.91$ . MS(ES+):  $m/z = 389.15[\text{M}+\text{H}]^+, 373.96, 280.37, 272.17, 221.12$ .

**(6u) 4-[1H-indol-3-yl(naphthalen-1-yl)methyl]-N-methylaniline.**  $\text{C}_{26}\text{H}_{22}\text{N}_2$ . Brown solid. M.P.: 104 °C. (Hexane/EtOAc 8:2). IR (KBr,  $\text{cm}^{-1}$ ): 3419 (s), 3350 (m), 3047 (m), 3012 (m), 2868 (m), 2810 (m), 1716 (m), 1683 (m), 1614 (m), 1519 (s), 1456 (s), 1417 (m), 1394 (m), 1338 (m), 1317 (m), 1263 (m), 1219 (m), 1180 (m), 1149 (m), 1105 (m), 1091 (m), 1049 (m), 1008 (w), 825 (m), 788 (m), 771 (m), 740 (s), 700 (m), 651 (w), 605 (w).  $^1\text{H}$  NMR (500 MHz,  $\text{CDCl}_3$ )  $\delta = 8.12$  (d,  $J = 8.5$  Hz, 1 H), 7.91 - 7.88 (m, 1 H), 7.85 (dd,  $J = 1.1, 8.4$  Hz, 1 H), 7.72 (d,  $J = 8.2$  Hz, 1 H), 7.45 - 7.38 (m, 2 H), 7.36 - 7.34 (m, 1 H), 7.34 - 7.28 (m, 1 H), 7.26 (d,  $J = 7.9$  Hz, 1H), 7.16 (dt,  $J = 0.9, 7.6$  Hz, 1 H), 7.13 (d,  $J = 7.0$  Hz, 1 H), 7.05 (d,  $J = 8.5$  Hz, 2 H), 6.97 (t,  $J = 7.5$  Hz, 1 H), 6.55 (d,  $J = 8.5$  Hz, 2 H), 6.48 (dd,  $J = 1.1, 2.3$  Hz, 1 H), 6.32 (s, 1 H), 2.81 (s, 3 H).  $^{13}\text{C}$  NMR (126 MHz,  $\text{CDCl}_3$ )  $\delta = 147.63, 140.33, 136.73, 133.93, 132.51, 131.95, 129.92, 128.58, 127.09, 126.86, 126.67, 125.82, 125.40, 125.23, 124.60, 124.45, 121.97, 120.50, 119.91, 119.28, 112.47, 110.99, 43.83, 30.87$ . MS(ES+):  $m/z = 361.14[\text{M}+\text{H}]^+, 254.10, 244.15, 229.06, 215.15, 202.07$ .

**(6v) N-ethyl-4-[1H-indol-3-yl(phenyl)methyl]aniline.**  $\text{C}_{23}\text{H}_{22}\text{N}_2$ . Light brown solid. M.P.: 49 °C. (Hexane/EtOAc 8.5:1.5). IR (KBr,  $\text{cm}^{-1}$ ): 3412 (br, s), 3082 (w), 3055 (w), 3022 (w), 3003 (w), 2968 (w), 2924 (w), 2870 (w), 1614 (s), 1519 (s), 1506 (s), 1492 (m), 1456 (s), 1417 (m), 1338 (m), 1317 (w), 1257 (w), 1217 (m), 1184 (w), 1147 (w), 1101 (w), 1093 (m), 1010 (w), 927 (w), 846 (w), 792 (w), 744 (s), 700 (m), 667 (w).  $^1\text{H}$  NMR (500 MHz,  $\text{CDCl}_3$ )  $\delta = 7.91$  (br s, 1 H), 7.33 (d,  $J = 7.9$  Hz, 1 H), 7.29 - 7.21 (m, 5 H), 7.21 - 7.13 (m, 2 H), 7.03 (d,  $J = 8.5$  Hz, 2 H), 6.97 (ddd,  $J = 0.9, 7.0, 7.9$  Hz, 1 H), 6.57 (dd,  $J = 1.2, 2.4$  Hz, 1 H), 6.54 (d,  $J = 8.5$  Hz, 2 H), 5.56 (s, 1 H), 3.49 (br s, 1H), 3.13 (q,  $J = 7.2$  Hz, 2 H), 1.24 (t,  $J = 7.2$  Hz, 3 H).  $^{13}\text{C}$  NMR (126 MHz,  $\text{CDCl}_3$ )  $\delta = 146.83, 144.87, 136.80, 133.04, 129.86, 129.07, 128.28, 127.19, 126.08, 124.12, 122.01, 120.59, 120.15, 119.33, 112.86, 111.14, 48.08, 38.78, 15.06$ . MS(ES+):  $m/z = 327.14[\text{M}+\text{H}]^+, 295.22, 268.16, 243.16, 204.04, 193.05$ .

**(6w) N-ethyl-4-[1H-indol-3-yl(4-methylphenyl)methyl]aniline.**  $\text{C}_{24}\text{H}_{24}\text{N}_2$ . Light brown solid. M.P.: 98 - 100 °C. (Hexane/EtOAc 8.5:1.5). IR (KBr,  $\text{cm}^{-1}$ ): 3408 (br, s), 3049 (m), 3007 (m), 2972 (m), 2924 (m), 2868 (m), 1614 (s), 1519 (s), 1456 (s), 1417 (m), 1338 (m), 1251 (m), 1246 (m), 1217 (m), 1180 (m), 1147 (m), 1122 (m), 1093 (m), 1039 (w), 1010 (m), 929 (w), 842 (w), 744 (s), 667 (m).  $^1\text{H}$  NMR (500 MHz,  $\text{CDCl}_3$ )  $\delta = 7.91$  (br s, 1 H), 7.33 (d,  $J = 8.2$  Hz, 1 H), 7.24 (d,  $J = 7.9$  Hz, 1 H), 7.14 (ddd,  $J = 0.9, 7.0, 7.7$  Hz, 1H), 7.11 (d,  $J = 7.9$  Hz, 2H), 7.06 (d,  $J = 7.9$  Hz, 2 H), 7.02 (d,  $J = 8.5$  Hz, 2H), 6.97 (ddd,  $J = 0.9, 7.0, 8.2$  Hz, 1H), 6.58 (dd,  $J = 1.2, 2.4$  Hz, 1 H), 6.53 (d,  $J = 8.5$  Hz, 2 H), 5.52 (s, 1 H), 3.12 (q,  $J = 7.2$  Hz, 2 H), 2.31 (s, 3 H), 1.23 (t,  $J = 7.2$  Hz, 3 H).  $^{13}\text{C}$  NMR (126 MHz,  $\text{CDCl}_3$ )  $\delta = 146.75, 141.80, 136.77, 135.38, 133.19, 129.73, 128.91, 128.85, 127.19, 123.96, 121.93, 120.83, 120.15, 119.25, 112.75, 110.99, 47.59, 38.72, 21.10, 15.03$ . MS(ES+):  $m/z = 341.22[\text{M}+\text{H}]^+, 312.16, 220.86, 204.14, 180.14$ .

**(6x) N-ethyl-4-[1H-indol-3-yl(4-nitrophenyl)methyl]aniline.** C<sub>23</sub>H<sub>21</sub>N<sub>3</sub>O<sub>2</sub>. Orange solid. M.P.: 116 – 119 °C. (Hexane/EtOAc 7.5:2.5). IR (KBr, cm<sup>-1</sup>): 3410 (br, s), 3105 (m), 3057 (m), 3020 (m), 2972 (m), 2929 (m), 2870 (m), 1732 (m), 1614 (s), 1608 (m), 1519 (s), 1489 (m), 1456 (s), 1417 (m), 1346 (s), 1267 (m), 1217 (m), 1184 (m), 1149 (m), 1109 (m), 1095 (m), 1049 (m), 1010 (m), 929 (w), 848 (w), 802 (m), 748 (s), 698 (m), 667 (m). <sup>1</sup>H NMR (500 MHz, CDCl<sub>3</sub>) δ = 8.12 (d, *J* = 8.9 Hz, 2 H), 8.01 (br s, 1 H), 7.42 - 7.35 (m, 3 H), 7.21 - 7.16 (m, 2 H), 7.03 - 6.97 (m, 3 H), 6.59 (dd, *J* = 0.9, 2.4 Hz, 1 H), 6.55 (d, *J* = 8.5 Hz, 2 H), 5.64 (s, 1 H), 3.60 (br s, 1H), 3.14 (q, *J* = 7.2 Hz, 2 H), 1.25 (t, *J* = 7.2 Hz, 3 H). <sup>13</sup>C NMR (126 MHz, CDCl<sub>3</sub>) δ = 152.66, 147.27, 146.40, 136.80, 131.05, 129.75, 129.73, 126.71, 124.12, 123.57, 122.37, 119.70, 119.63, 119.08, 112.88, 111.29, 47.97, 38.60, 14.94. MS(ES+): *m/z* = 372.16[M+H]<sup>+</sup>, 343.11, 251.09, 221.11, 204.14.

**(6y) N-ethyl-4-[1H-indol-3-yl(4-bromophenyl)methyl]aniline.** C<sub>23</sub>H<sub>21</sub>N<sub>2</sub>Br. Light brown solid. M.P.: 142 – 144 °C. (Hexane/EtOAc 8.5:1.5). IR (KBr, cm<sup>-1</sup>): 3406 (br, s), 2953 (s), 2922 (s), 2850 (s), 1614 (s), 1514 (s), 1485 (s), 1456 (s), 1417 (s), 1336 (m), 1317 (m), 1255 (m), 1242 (m), 1176 (m), 1093 (m), 1070 (m), 1010 (m), 854 (w), 785 (m), 742 (m). <sup>1</sup>H NMR (500 MHz, CDCl<sub>3</sub>) δ = 7.93 (br s, 1 H), 7.37 (d, *J* = 8.2 Hz, 2 H), 7.34 (d, *J* = 8.2 Hz, 1 H), 7.20 (d, *J* = 7.9 Hz, 1 H), 7.16 (ddd, *J* = 1.2, 7.0, 7.9 Hz, 1 H), 7.10 (d, *J* = 8.2 Hz, 2 H), 7.04 - 6.94 (m, 3 H), 6.56 (dd, *J* = 1.1, 2.3 Hz, 1 H), 6.53 (d, *J* = 8.5 Hz, 2 H), 5.50 (s, 1 H), 3.49 (br s, 1 H), 3.13 (q, *J* = 7.2 Hz, 2 H), 1.24 (t, *J* = 7.2 Hz, 3 H). <sup>13</sup>C NMR (126 MHz, CDCl<sub>3</sub>) δ = 146.98, 143.87, 136.77, 132.21, 131.28, 130.77, 129.71, 126.94, 124.03, 122.14, 120.07, 119.99, 119.83, 119.43, 112.78, 111.11, 47.46, 38.67, 15.00. MS(ES+): *m/z* = 407.07[M+1+H]<sup>+</sup>, 376.03, 283.95, 221.12, 204.02.

**(6z) N-ethyl-4-[1H-indol-3-yl(3,4-dichlorophenyl)methyl]aniline.** C<sub>23</sub>H<sub>21</sub>N<sub>2</sub>Cl<sub>2</sub>. Light brown solid. M.P.: 50 °C. (Hexane/EtOAc 8:2). IR (KBr, cm<sup>-1</sup>): 3454 (s), 3410 (s), 3223 (w), 3049 (m), 3018 (m), 2970 (m), 2926 (m), 2870 (m), 1726 (m), 1614 (s), 1514 (s), 1467 (s), 1454 (s), 1415 (s), 1384 (m), 1323 (s), 1265 (s), 1217 (m), 1184 (m), 1147 (m), 1130 (m), 1095 (m), 1049 (w), 1029 (s), 1010 (w), 904 (w), 817 (s), 792 (s), 732 (s), 704 (s), 673 (m). <sup>1</sup>H NMR (500 MHz, CDCl<sub>3</sub>) δ = 7.97 (br s, 1 H), 7.35 (d, *J* = 8.2 Hz, 1 H), 7.31 (d, *J* = 8.2 Hz, 1H), 7.31 (d, *J* = 2.1 Hz, 1H), 7.21 (d, *J* = 7.9 Hz, 1 H), 7.17 (ddd, *J* = 1.2 Hz, 7.0, 7.9 Hz, 1 H), 7.05 (dd, *J* = 2.1, 8.2 Hz, 1 H), 7.02 - 6.96 (m, 3 H), 6.57 (dd, *J* = 1.1, 2.3 Hz, 1 H), 6.54 (d, *J* = 8.5 Hz, 2 H), 5.50 (s, 1 H), 3.51 (br s, 1 H), 3.13 (q, *J* = 7.2 Hz, 2 H), 1.24 (t, *J* = 7.2 Hz, 3 H). <sup>13</sup>C NMR (126 MHz, CDCl<sub>3</sub>) δ = 147.13, 145.32, 136.80, 132.20, 131.64, 130.87, 130.17, 129.94, 129.71, 128.48, 126.81, 124.11, 122.28, 119.85, 119.57, 119.48, 112.93, 111.26, 47.28, 38.70, 14.99. MS(ES+): *m/z* = 397.14[M+1+H]<sup>+</sup>, 366.09, 274.00, 238.10, 221.13, 204.03.

**(6aa) 4-[1H-indol-3-yl(phenyl)methyl]aniline.** C<sub>21</sub>H<sub>18</sub>N<sub>2</sub>. Brown solid. M.P.: 164 °C. (Hexane/EtOAc 8:2, 7:3). IR (KBr, cm<sup>-1</sup>): 3423 (s), 3342 (s), 3251 (s), 3080 (m), 3057 (m), 3034 (m), 3016 (m), 2860 (m), 1683 (m), 1622 (m), 1516 (s), 1490 (s), 1456 (s), 1417 (m), 1338 (m), 1267 (m), 1234 (m), 1176 (m), 1157 (m), 1120 (m), 1089 (m), 1074 (m), 1051 (m), 1029 (m), 1006 (m), 929 (w), 871 (w), 846 (w), 837 (w), 808 (m), 802 (m), 790 (m), 742 (s), 694 (s), 607 (m). <sup>1</sup>H NMR (500 MHz, CDCl<sub>3</sub>) δ = 7.92 (br s, 1H), 7.34 (d, *J* = 8.2 Hz, 1 H), 7.28 - 7.26 (m, 1 H), 7.25 - 7.21 (m, 4 H), 7.21 - 7.17 (m, 1 H), 7.17 - 7.13 (m, 1 H), 7.00 (d, *J* = 8.5 Hz, 2 H), 6.97 (ddd, *J* = 0.7, 7.0, 8.2 Hz, 1 H), 6.61 (d, *J* = 8.5 Hz, 2 H), 6.57 (dd, *J* = 1.1, 2.3 Hz, 1 H), 5.56 (s, 1 H), 3.71 (br s, 2H). <sup>13</sup>C NMR (126 MHz, CDCl<sub>3</sub>) δ = 144.65, 144.45, 136.78, 134.40, 129.87, 129.01, 128.27, 127.11, 126.10, 124.08, 122.02, 120.42, 120.08, 119.33, 115.30, 111.10, 48.07. MS(ES+): *m/z* = 299.14[M+H]<sup>+</sup>, 206.12, 182.06, 165.08.

**(6bb) 4-[1H-indol-3-yl(4-methylphenyl)methyl]aniline.** C<sub>22</sub>H<sub>20</sub>N<sub>2</sub>. Brown solid. M.P.: 179 °C. (Hexane/EtOAc 8:2, 7:3). IR (KBr, cm<sup>-1</sup>): 3419 (s), 3342 (s), 3269 (m), 3057 (m), 2997 (m), 2937 (m), 2918 (m), 2870 (m), 2837 (m), 1780 (w), 1734 (w), 1718 (w), 1701 (w), 1616 (m), 1593 (s), 1512 (s), 1485 (s), 1456 (s), 1429 (m), 1340 (m), 1315 (m), 1267 (s), 1253 (s), 1242 (s), 1217 (m), 1180 (m), 1153 (m), 1122 (m), 1089 (m), 1076 (m), 1029 (s), 1012 (m), 993 (m), 943 (w), 927 (w), 893 (w), 877 (w), 866 (w), 837 (m), 786 (m), 771 (s), 750 (s), 696 (m), 619 (m). <sup>1</sup>H NMR (500 MHz, CDCl<sub>3</sub>) δ = 7.90 (br s, 1 H), 7.33 (d, *J* = 8.1 Hz, 1 H), 7.24 (d, *J* = 7.9 Hz, 1 H), 7.14 (ddd, *J* = 1.2, 7.0, 7.9 Hz, 1 H), 7.11 (d, *J* = 7.9 Hz, 2 H), 7.07 (d, *J* = 7.9 Hz, 2 H), 7.00 (d, *J* = 8.5 Hz, 2H), 6.97 (ddd, *J* = 1.2, 7.0, 8.1 Hz, 1 H), 6.60 (d, *J* = 8.5 Hz, 2 H), 6.57 (dd, *J* = 1.2, 2.4 Hz, 1 H), 3.61 (br s, 1H), 5.52 (s, 1 H), 2.31 (s, 3 H). <sup>13</sup>C NMR (126 MHz, CDCl<sub>3</sub>) δ = 144.44, 141.65, 136.77, 135.48, 134.59, 129.81, 128.96, 128.85, 127.14, 123.99, 121.98, 120.63, 120.11, 119.29, 115.22, 111.06, 47.64, 21.11. MS(ES+): *m/z* = 313.16[M+H]<sup>+</sup>, 220.28, 204.28, 196.09, 180.94, 180.74.

**(6cc) 4-[1H-indol-3-yl(3-methylphenyl)methyl]aniline.** C<sub>22</sub>H<sub>20</sub>N<sub>2</sub>. Light brown solid. M.P.: 64 °C. (Hexane/EtOAc 8:2, 7:3). IR (KBr, cm<sup>-1</sup>): 3408 (s), 3334 (s), 3213 (m), 3053 (m), 3032 (m), 3014 (m), 2920 (m), 2858 (m), 1724 (m), 1683 (m), 1616 (m), 1506 (s), 1489 (m), 1456 (s), 1436 (m), 1417 (m), 1373 (m), 1338 (m), 1246 (m), 1217 (m), 1176 (m), 1147 (w), 1122 (m), 1091 (m), 1041 (m), 1008 (m), 839 (w), 767 (m), 742 (s), 700 (s), 611 (m). <sup>1</sup>H NMR (500 MHz, CDCl<sub>3</sub>) δ = 7.92 (br s, 1 H), 7.33 (d, *J* = 8.2 Hz, 1 H), 7.24 (d, *J* = 7.9 Hz, 1 H), 7.18 - 7.12 (m, 2 H), 7.05 (s, 1 H), 7.03 - 6.95 (m, 5 H), 6.61 (d, *J* = 8.5 Hz, 2 H), 6.57 (dd, *J* = 0.9, 2.4 Hz, 1 H), 5.52 (s, 1 H), 3.57 (br s, 2 H), 2.28 (s, 3 H). <sup>13</sup>C NMR (126 MHz, CDCl<sub>3</sub>) δ = 144.65, 144.50, 137.76, 136.80, 134.49, 129.88, 129.79, 128.17, 127.18, 126.92, 126.09, 124.12, 121.98, 120.46, 120.10, 119.30, 115.27, 111.14, 48.06, 21.62. MS(ES+): *m/z* = 313.16[M+H]<sup>+</sup>, 220.28, 204.28, 196.09, 180.94, 180.74.

**(6dd) 4-[1H-indol-3-yl(4-nitrophenyl)methyl]aniline.** C<sub>21</sub>H<sub>17</sub>N<sub>3</sub>O<sub>2</sub>. Orange solid. M.P.: 53 °C. (Hexane/EtOAc 8:2, 7:3, 6:4). IR (KBr, cm<sup>-1</sup>): IR (KBr, cm<sup>-1</sup>): 3417 (br, m), 3217 (m), 3107 (m), 3053 (m), 3034 (m), 3012 (m), 2956 (m), 2924 (m), 2854 (m), 1930 (w), 1892 (w), 1726 (m), 1620 (m), 1514 (s), 1487 (m), 1456 (m), 1417 (m), 1346 (s), 1265 (m), 1219 (m), 1180 (m), 1149 (w), 1124 (m), 1109 (m), 1049 (m), 1012 (m), 960 (w), 931 (w), 850 (m), 742 (s), 696 (m), 667 (m), 613 (m). <sup>1</sup>H NMR (500 MHz, CDCl<sub>3</sub>) δ = 8.12 (d, *J* = 8.9 Hz, 2 H), 8.02 (br s, 1 H), 7.41 - 7.34 (m, 3 H), 7.22 - 7.15 (m, 2 H), 7.03 - 6.94 (m, 3 H), 6.63 (d, *J* = 8.5 Hz, 2 H), 6.58 (dd, *J* = 0.9, 2.4 Hz, 1 H), 5.65 (s, 1 H), 3.63 (br s, 2 H). <sup>13</sup>C NMR (126 MHz, CDCl<sub>3</sub>) δ = 152.48, 146.43, 145.15, 136.81, 132.47, 129.79, 129.75, 126.66, 124.13, 123.59, 122.38, 119.65, 119.64, 118.88, 115.35, 111.33, 47.98. Product had decomposed until mass spectrometry was performed.

**(6ee) 4-[1H-indol-3-yl(3-methoxyphenyl)methyl]aniline.** C<sub>22</sub>H<sub>20</sub>N<sub>2</sub>O. Yellow solid. M.P.: 137 °C. (Hexane/EtOAc 8:2, 7:3, 6.5:3.5). IR (KBr, cm<sup>-1</sup>): 3419 (s), 3404 (s), 3340 (s), 3275 (br, s), 3143 (s), 3057 (s), 2997 (s), 2937 (s), 2918 (s), 2870 (s), 2835 (s), 1734 (w), 1718 (w), 1701 (w), 1683 (m), 1652 (w), 1618 (s), 1593 (s), 1539 (w), 1512 (s), 1485 (s), 1467 (s), 1456 (s), 1452 (s), 1429 (s), 1419 (s), 1388 (w), 1340 (m), 1315 (m), 1265 (s), 1252 (s), 1242 (s), 1217 (m), 1180 (m), 1153 (m), 1122 (m), 1089 (m), 1076 (m), 1029 (s), 1012 (m), 993 (m), 943 (w), 927 (w), 893 (w), 877 (w), 866 (w), 837 (m), 808 (w), 786 (s), 771 (s), 750 (s), 696 (m), 619 (m), 607

(m). <sup>1</sup>H NMR (500 MHz, CDCl<sub>3</sub>) δ = 7.92 (br s, 1 H), 7.33 (d, *J* = 8.2 Hz, 1 H), 7.25 (d, *J* = 7.9 Hz, 2 H), 7.20 - 7.13 (m, 2 H), 7.01 (d, *J* = 8.5 Hz, 2 H), 6.98 (ddd, *J* = 0.9, 7.2, 8.2 Hz, 1 H), 6.82 (d, *J* = 7.6 Hz, 1 H), 6.79 (t, *J* = 2.1 Hz, 1 H), 6.74 (ddd, *J* = 0.9, 2.5, 8.2 Hz, 1 H), 6.64 - 6.58 (m, 3 H), 5.53 (s, 1 H), 3.72 (s, 3 H). <sup>13</sup>C NMR (126 MHz, CDCl<sub>3</sub>) δ = 159.55, 146.29, 144.49, 136.73, 134.12, 129.78, 129.10, 127.10, 123.93, 121.99, 121.53, 120.32, 120.02, 119.31, 115.20, 114.96, 111.19, 110.99, 55.13, 48.05. MS(ES<sup>+</sup>): *m/z* = 329.16[M+H]<sup>+</sup>, 236.16, 221.13, 212.16, 196.95, 180.95.

**(6ff) 4-[1*H*-indol-3-yl(4-methoxyphenyl)methyl]aniline.** C<sub>21</sub>H<sub>20</sub>N<sub>2</sub>O. Light red solid. M.P.: 80 °C. (Hexane/EtOAc 8:2, 7:3, 6.5:3.5). IR (KBr, cm<sup>-1</sup>): 3441 (br, s), 3059 (m), 3034 (m), 2960 (m), 2931 (s), 2904 (m), 2858 (m), 2835 (m), 1888 (w), 1770 (w), 1732 (m), 1716 (m), 1699 (m), 1622 (s), 1614 (m), 1539 (m), 1519 (s), 1504 (s), 1456 (s), 1435 (m), 1417 (m), 1373 (m), 1338 (m), 1338 (m), 1298 (m), 1246 (m), 1219 (m), 1172 (m), 1123 (m), 1105 (m), 1087 (m), 1033 (m), 1008 (m), 929 (w), 873 (w), 842 (m), 810 (m), 790 (m), 773 (m), 759 (m), 738 (m), 667 (m). <sup>1</sup>H NMR (500 MHz, CDCl<sub>3</sub>) δ = 7.92 (br s, 1 H), 7.33 (d, *J* = 8.2 Hz, 1 H), 7.23 (d, *J* = 7.9 Hz, 1 H), 7.19 - 7.12 (m, 3 H), 7.02 - 6.94 (m, 3 H), 6.81 (d, *J* = 8.9 Hz, 2 H), 6.61 (d, *J* = 8.5 Hz, 2 H), 6.56 (dd, *J* = 1.1, 2.3 Hz, 1 H), 5.51 (s, 1 H), 3.77 (s, 3 H), 3.58 (br s, 2 H). <sup>13</sup>C NMR (126 MHz, CDCl<sub>3</sub>) δ = 157.88, 144.47, 136.89, 136.80, 134.67, 129.88, 129.77, 127.10, 123.98, 121.97, 120.77, 120.11, 119.27, 115.21, 113.62, 111.08, 55.27, 47.20 (s). MS(ES<sup>+</sup>): *m/z* = 329.07[M+H]<sup>+</sup>, 236.14, 221.12, 212.14, 197.06, 168.24.

**(6gg) 4-[1*H*-indol-3-yl(4-bromophenyl)methyl]aniline.** C<sub>21</sub>H<sub>17</sub>BrN<sub>2</sub>. Yellow solid. M.P.: 78 °C. (Hexane/EtOAc 8:2, 7:3). IR (KBr, cm<sup>-1</sup>): 3408 (br, m), 3340 (m), 3051 (m), 3032 (m), 3012 (m), 2999 (m), 2978 (m), 2920 (m), 2858 (m), 1890 (w), 1734 (m), 1718 (m), 1701 (m), 1683 (m), 1616 (m), 1516 (s), 1506 (s), 1481 (m), 1456 (s), 1436 (m), 1417 (m), 1398 (m), 1373 (w), 1338 (m), 1257 (m), 1246 (m), 1217 (m), 1178 (m), 1149 (w), 1122 (w), 1093 (m), 1070 (m), 1047 (m), 1008 (m), 871 (w), 844 (w), 810 (m), 783 (m), 742 (m), 669 (m), 603 (m). <sup>1</sup>H NMR (500 MHz, CDCl<sub>3</sub>) δ = 7.94 (br s, 1 H), 7.37 (d, *J* = 8.2 Hz, 2 H), 7.34 (d, *J* = 8.2 Hz, 1 H), 7.21 (d, *J* = 7.9 Hz, 1 H), 7.16 (ddd, *J* = 0.9, 7.1, 7.9 Hz, 1 H), 7.09 (d, *J* = 8.2 Hz, 2 H), 7.01 - 6.94 (m, 3 H), 6.61 (d, *J* = 8.5 Hz, 2 H), 6.55 (dd, *J* = 1.1, 2.3 Hz, 1 H), 5.50 (s, 1 H), 3.58 (br s, 2 H). <sup>13</sup>C NMR (126 MHz, CDCl<sub>3</sub>) δ = 144.67, 144.65, 143.63, 143.61, 136.68, 133.53, 131.23, 130.67, 129.69, 123.96, 122.09, 119.85, 119.82, 119.37, 115.16, 111.08, 47.40. MS(ES<sup>+</sup>): *m/z* = 378.04[M+H]<sup>+</sup>, 285.84, 221.13, 204.16, 180.09

**(6hh) 4-[1*H*-indol-3-yl(3,4-dichlorophenyl)methyl]aniline.** C<sub>21</sub>H<sub>16</sub>Cl<sub>2</sub>N<sub>2</sub>. Yellow solid. M.P.: 69 °C. (Hexane/EtOAc 8:2, 7:3). IR (KBr, cm<sup>-1</sup>): 3444 (m), 3408 (m), 3224 (m), 3053 (m), 3003 (m), 2924 (w), 2866 (w), 1732 (m), 1716 (m), 1620 (m), 1514 (s), 1506 (s), 1467 (s), 1456 (s), 1417 (m), 1392 (m), 1338 (m), 1265 (m), 1219 (m), 1180 (m), 1130 (m), 1049 (m), 1029 (m), 1010 (m), 904 (m), 889 (m), 825 (m), 790 (m), 744 (s), 705 (m), 667 (m). <sup>1</sup>H NMR (500 MHz, CDCl<sub>3</sub>) δ = 7.98 (br s, 1 H), 7.35 (d, *J* = 8.2 Hz, 1 H), 7.32 (d, *J* = 8.5 Hz, 1 H), 7.30 (d, *J* = 2.1 Hz, 1H) 7.21 (d, *J* = 7.9 Hz, 1 H), 7.17 (ddd, *J* = 0.9, 7.1, 7.9 Hz, 1 H), 7.04 (ddd, *J* = 0.6, 2.1, 8.3 Hz, 1 H), 7.00 (ddd, *J* = 1.1, 7.1, 8.2 Hz, 1 H), 6.96 (d, *J* = 8.5 Hz, 2 H), 6.62 (d, *J* = 8.5 Hz, 2 H), 6.57 (dd, *J* = 0.9, 2.4 Hz, 1 H), 5.50 (s, 1 H), 3.61 (br s, 2 H). <sup>13</sup>C NMR (126 MHz, CDCl<sub>3</sub>) δ = 145.01, 144.90, 136.72, 132.88, 132.17, 130.78, 130.11, 129.96, 129.68, 128.37, 126.70, 123.96, 122.26, 119.74, 119.54, 119.36, 115.24, 111.14, 47.22. MS(ES<sup>+</sup>): *m/z* = 367.10[M+H]<sup>+</sup>, 274.06, 250.06, 204.07, 180.09, 152.05.

**(6II) 4-[1*H*-indol-3-yl(phenyl)methyl]-3-methylaniline.** C<sub>22</sub>H<sub>20</sub>N<sub>2</sub>. Brown solid. M.P.: 84 °C. (Hexane/EtOAc 7.5:2.5). IR (KBr, cm<sup>-1</sup>): 3402 (s), 3325 (s), 3242 (br, s), 3078 (s), 3057 (s), 3016 (s), 2920 (m), 2887 (m), 1732 (m), 1620 (s), 1614 (s), 1583 (m), 1573 (m), 1519 (m), 1492 (s), 1456 (s), 1435 (m), 1417 (m), 1352 (m), 1338 (m), 1303 (m), 1273 (m), 1244 (m), 1217 (s), 1199 (s), 1184 (w), 1109 (w), 1101 (m), 1074 (m), 1051 (m), 1029 (m), 1006 (m), 952 (w), 923 (w), 912 (w), 869 (m), 835 (m), 817 (m), 798 (m), 752 (s), 696 (s), 667 (s), 653 (m), 623 (m), 609 (m). <sup>1</sup>H NMR (500 MHz, CDCl<sub>3</sub>) δ = 7.90 (br s, 1 H), 7.33 (d, *J* = 8.2 Hz, 1 H), 7.27 - 7.13 (m, 7 H), 6.98 (ddd, *J* = 0.9, 7.0, 8.2 Hz, 1 H), 6.72 (d, *J* = 8.2 Hz, 1 H), 6.55 (d, *J* = 2.4 Hz, 1 H), 6.47 (dd, *J* = 0.9, 2.4 Hz, 1 H), 6.40 (dd, *J* = 2.4, 8.2 Hz, 1 H), 5.69 (s, 1 H), 2.22 (s, 3 H). <sup>13</sup>C NMR (126 MHz, CDCl<sub>3</sub>) δ = 144.30, 144.04, 137.28, 136.80, 132.69, 129.91, 129.18, 128.19, 127.17, 125.99, 124.24, 121.99, 120.13, 119.93, 119.28, 117.46, 112.75, 111.05, 44.45, 19.81. MS(ES<sup>+</sup>): *m/z* = 313.28[M+H]<sup>+</sup>, 196.16.

**(6mm) 4-[1*H*-indol-3-yl(3-methylphenyl)methyl]-3-methylaniline.** C<sub>23</sub>H<sub>22</sub>N<sub>2</sub>. Yellow solid. M.P.: 64 °C. (Hexane/EtOAc 7.5:2.5). IR (KBr, cm<sup>-1</sup>): 3402 (s), 3325 (s), 3219 (br, s), 3105 (s), 3043 (s), 3014 (s), 2993 (s), 2920 (s), 2866 (s), 1734 (m), 1683 (m), 1608 (s), 1606 (s), 1581 (s), 1516 (m), 1496 (s), 1456 (s), 1436 (s), 1379 (s), 1352 (m), 1338 (m), 1301 (m), 1273 (m), 1247 (m), 1217 (m), 1195 (m), 1166 (m), 1145 (m), 1124 (m), 1101 (m), 1049 (m), 1006 (m), 954 (m), 923 (w), 904 (w), 867 (m), 837 (m), 819 (m), 800 (m), 763 (s), 740 (s), 698 (s), 667 (s), 617 (s). <sup>1</sup>H NMR (500 MHz, CDCl<sub>3</sub>) δ = 7.90 (br s, 1 H), 7.34 (d, *J* = 8.2 Hz, 1 H), 7.24 (d, *J* = 7.9 Hz, 1 H), 7.18 - 7.10 (m, 2 H), 7.02 - 6.94 (m, 4 H), 6.72 (d, *J* = 8.2 Hz, 1 H), 6.54 (d, *J* = 2.4 Hz, 1 H), 6.48 (dd, *J* = 1.1, 2.3 Hz, 1 H), 6.40 (dd, *J* = 2.4, 8.2 Hz, 1 H), 5.65 (s, 1 H), 2.27 (s, 3 H), 2.22 (s, 3 H). <sup>13</sup>C NMR (126 MHz, CDCl<sub>3</sub>) δ = 144.33, 143.97, 137.64, 137.27, 136.79, 132.75, 129.94, 129.91, 128.04, 127.22, 126.79, 126.26, 124.23, 121.97, 120.26, 119.95, 119.27, 117.40, 112.70, 111.03, 44.40, 21.57, 19.85. MS(ES<sup>+</sup>): *m/z* = 327.15[M+H]<sup>+</sup>, 312.06, 297.04, 220.88, 210.15, 204.03.

**(6nn) 4-[1*H*-indol-3-yl(3-methoxyphenyl)methyl]-3-methylaniline.** C<sub>23</sub>H<sub>22</sub>N<sub>2</sub>O. Yellow solid. M.P.: 159 °C. (Hexane/EtOAc 5.5:4.5). IR (KBr, cm<sup>-1</sup>): 3408 (s), 3331 (s), 3242 (br, s), 3078 (s), 3034 (s), 3010 (s), 3003 (s), 2960 (s), 2939 (s), 2910 (s), 2850 (m), 2835 (m), 2744 (m), 2729 (m), 1932 (w), 1886 (w), 1884 (w), 1734 (w), 1683 (m), 1622 (s), 1604 (s), 1581 (s), 1573 (s), 1539 (m), 1500 (s), 1489 (s), 1456 (s), 1431 (s), 1379 (w), 1354 (m), 1338 (m), 1303 (m), 1265 (s), 1219 (m), 1197 (m), 1165 (m), 1143 (m), 1095 (m), 1082 (m), 1045 (s), 1008 (m), 968 (w), 952 (m), 931 (m), 918 (m), 869 (s), 835 (m), 823 (m), 798 (m), 781 (s), 772 (s), 750 (s), 715 (m), 694 (s), 655 (s), 615 (s). <sup>1</sup>H NMR (500 MHz, CDCl<sub>3</sub>) δ = 7.91 (br s, 1 H), 7.33 (d, *J* = 8.2 Hz, 1 H), 7.23 (d, *J* = 7.9 Hz, 1 H), 7.20 - 7.12 (m, 2 H), 6.98 (ddd, *J* = 0.9, 7.0, 8.2 Hz, 1 H), 6.78 (d, *J* = 7.3 Hz, 1 H), 6.76 - 6.71 (m, 3 H), 6.54 (d, *J* = 2.6 Hz, 1 H), 6.50 (dd, *J* = 1.1, 2.3 Hz, 1 H), 6.39 (dd, *J* = 2.6, 8.1 Hz, 1 H), 5.66 (s, 1 H), 3.72 (s, 3 H). <sup>13</sup>C NMR (126 MHz, CDCl<sub>3</sub>) δ = 159.57, 145.82, 144.41, 137.26, 136.77, 132.43, 129.84, 129.07, 127.18, 124.19, 121.98, 121.80, 119.98, 119.87, 119.28, 117.38, 115.20, 112.70, 111.12, 111.04, 55.13, 44.47, 19.82. MS(ES<sup>+</sup>): *m/z* = 343.30[M+H]<sup>+</sup>, 313.25, 236.17, 226.18, 196.19.

**(6oo) 4-[1*H*-indol-3-yl(4-bromophenyl)methyl]-3-methylaniline.** C<sub>22</sub>H<sub>19</sub>N<sub>2</sub>Br. Yellow solid. M.P.: 130 - 131 °C. (Hexane/EtOAc 7:3). IR (KBr, cm<sup>-1</sup>): 3406 (s), 3329 (s), 3201 (s), 3159 (s), 3101 (s), 3053 (s), 3037 (s), 3012 (s), 2978 (s), 2922 (s), 2870 (s), 1734 (m), 1718 (m), 1683 (m), 1616 (s), 1581 (m), 1541 (m), 1496 (s), 1485 (s), 1456 (s), 1400 (m), 1346 (m), 1338 (m), 1300 (m), 1273 (m), 1244 (m), 1217 (m), 1195 (m), 1180 (m), 1165 (m), 1122 (m), 1101 (m), 1070 (m), 1049 (m), 1010 (s), 950 (m), 939 (w), 925 (w), 920 (w), 864 (s), 848 (m), 835 (m), 817 (m), 800 (m), 786 (s), 740 (s), 702 (m), 630 (m), 615 (s). <sup>1</sup>H NMR (500 MHz, CDCl<sub>3</sub>) δ = 7.95 (br s, 1 H), 7.37 (d, *J* = 8.2 Hz, 2 H), 7.35 (d, *J* = 8.2 Hz, 1 H), 7.20 (d, *J* = 7.9 Hz, 1 H), 7.16 (ddd, *J* = 0.9, 7.1, 7.9 Hz, 1 H), 7.05 (d, *J* = 8.2 Hz, 2 H), 6.99 (ddd, *J* = 0.9, 7.0, 8.2 Hz, 1 H), 6.67 (d, *J* = 8.1 Hz, 1 H), 6.55 (d, *J* = 2.6 Hz, 1



H), 6.47 (dd,  $J = 1.2, 2.4$  Hz, 1 H), 6.40 (dd,  $J = 2.6, 8.1$  Hz, 1 H), 5.64 (s, 1 H), 3.53 (br s, 2 H), 2.20 (s, 3 H).  $^{13}\text{C}$  NMR (126 MHz,  $\text{CDCl}_3$ )  $\delta = 144.65, 143.31, 137.33, 136.85, 132.07, 131.37, 131.05, 129.91, 127.03, 124.36, 122.22, 119.92, 119.87, 119.50, 119.48, 117.56, 112.85, 111.32, 44.00, 19.87$ . MS(ES+):  $m/z = 393.10[\text{M}+1+\text{H}]^+$ , 286.08, 276.07, 204.20, 194.13, 180.08.

**(6pp) 4-[1H-indol-3-yl(3,4-dichlorophenyl)methyl]-3-methylaniline.**  $\text{C}_{22}\text{H}_{18}\text{N}_2\text{Cl}_2$ . Yellow solid. M.P.: 84 °C. (Hexane/EtOAc 7:3). IR (KBr,  $\text{cm}^{-1}$ ): 3466 (s), 3410 (s), 3223 (m), 3057 (m), 3010 (s), 2976 (m), 2918 (m), 2868 (m), 1892 (w), 1728 (m), 1629 (s), 1582 (m), 1562 (m), 1504 (s), 1467 (s), 1456 (s), 1417 (m), 1392 (m), 1336 (m), 1309 (m), 1249 (m), 1215 (s), 1184 (m), 1130 (m), 1093 (m), 1049 (m), 1029 (m), 1010 (m), 950 (w), 927 (w), 902 (m), 860 (m), 794 (s), 748 (br, s), 705 (m), 667 (s), 621 (m).  $^1\text{H}$  NMR (500 MHz,  $\text{CDCl}_3$ )  $\delta = 7.97$  (br s, 1 H), 7.36 (d,  $J = 8.2$  Hz, 1 H), 7.32 (d,  $J = 8.2$  Hz, 1 H), 7.26 (d, 1 H), 7.23 - 7.15 (m, 2 H), 7.03 - 6.98 (m, 2 H), 6.66 (d,  $J = 8.2$  Hz, 1 H), 6.55 (d,  $J = 2.6$  Hz, 1 H), 6.48 (dd,  $J = 0.9, 2.6$  Hz, 1 H), 6.41 (dd,  $J = 2.6, 8.2$  Hz, 1 H), 5.64 (s, 1 H), 3.55 (br s, 2 H), 2.20 (s, 3 H).  $^{13}\text{C}$  NMR (126 MHz,  $\text{CDCl}_3$ )  $\delta = 144.76, 144.60, 137.15, 136.74, 136.73, 132.17, 131.24, 130.94, 130.06, 129.91, 129.71, 128.57, 126.79, 124.13, 122.24, 119.61, 119.50, 118.99, 117.39, 112.72, 111.13, 43.63, 19.70$ . MS(ES+):  $m/z = 383.29[\text{M}+\text{H}]^+$ , 381.29, 276.10, 274.10, 266.10, 264.10.

**(6qq) 4-[1H-indol-3-yl(phenyl)methyl]-2-methylaniline.**  $\text{C}_{22}\text{H}_{20}\text{N}_2$ . Yellow solid. M.P.: 65 °C. (Hexane/EtOAc 7:3). IR (KBr,  $\text{cm}^{-1}$ ): 3417 (br, s), 3219 (m), 3080 (m), 3055 (m), 3022 (m), 2980 (m), 2922 (m), 2899 (m), 2858 (m), 1734 (m), 1683 (m), 1652 (m), 1624 (m), 1612 (m), 1506 (s), 1490 (m), 1456 (s), 1417 (m), 1373 (w), 1354 (w), 1338 (m), 1265 (m), 1219 (m), 1153 (w), 1122 (w), 1093 (m), 1076 (w), 1049 (w), 1029 (w), 1010 (w), 894 (w), 808 (m), 792 (m), 740 (m), 702 (m), 611 (m).  $^1\text{H}$  NMR (500 MHz,  $\text{CDCl}_3$ )  $\delta = 7.92$  (br s, 1 H), 7.34 (d,  $J = 8.2$  Hz, 1 H), 7.28 - 7.26 (m, 1 H), 7.25 - 7.21 (m, 4 H), 7.21 - 7.13 (m, 2 H), 6.97 (t,  $J = 7.6$  Hz, 1 H), 6.93 (d,  $J = 1.8$  Hz, H), 6.86 (dd,  $J = 2.1, 7.9$  Hz, 1 H), 6.61 - 6.56 (m, 2 H), 5.54 (s, 1 H), 2.10 (s, 3 H).  $^{13}\text{C}$  NMR (126 MHz,  $\text{CDCl}_3$ )  $\delta = 144.67, 142.60, 136.69, 134.30, 131.02, 128.91, 128.15, 127.36, 127.08, 125.95, 123.96, 122.31, 121.91, 120.49, 120.01, 119.22, 114.97, 110.95, 48.04, 17.47$ . MS(ES+):  $m/z = 313.25[\text{M}+\text{H}]^+$ , 206.18, 195.93.

**(6rr) 4-[1H-indol-3-yl(3-methoxyphenyl)methyl]-2-methylaniline.**  $\text{C}_{23}\text{H}_{22}\text{N}_2\text{O}$ . Yellow solid. M.P.: 135 °C. (Hexane/EtOAc 6:4). IR (KBr,  $\text{cm}^{-1}$ ): 3417 (s), 3223 (m), 3049 (m), 3003 (m), 2956 (s), 2926 (s), 2856 (m), 2837 (m), 1732 (m), 1622 (s), 1606 (s), 1597 (s), 1581 (s), 1539 (w), 1504 (s), 1485 (s), 1456 (s), 1435 (s), 1417 (s), 1373 (w), 1338 (m), 1311 (m), 1265 (s), 1219 (m), 1149 (m), 1139 (m), 1122 (w), 1093 (m), 1047 (m), 1010 (w), 995 (w), 889 (w), 875 (w), 825 (w), 773 (m), 742 (s), 698 (m), 624 (w).  $^1\text{H}$  NMR (500 MHz,  $\text{CDCl}_3$ )  $\delta = 7.92$  (br s, 1 H), 7.33 (d,  $J = 7.9$  Hz, 1 H), 7.26 (d,  $J = 7.9$  Hz, 1 H), 7.20 - 7.12 (m, 2 H), 6.97 (ddd,  $J = 0.9, 7.0, 7.9$  Hz, 1 H), 6.93 (d,  $J = 2.0$  Hz, 1 H), 6.87 (dd,  $J = 2.0, 8.2$  Hz, 1 H), 6.83 (d,  $J = 7.9$  Hz, 1 H), 6.80 (t,  $J = 2.4$  Hz, 1 H), 6.73 (ddd,  $J = 0.8, 2.6, 8.2$  Hz, 1 H), 6.60 (dd,  $J = 1.1, 2.3$  Hz, 1 H), 6.58 (d,  $J = 8.2$  Hz, 1 H), 5.51 (s, 1 H), 3.73 (s, 3 H), 2.10 (s, 3 H).  $^{13}\text{C}$  NMR (126 MHz,  $\text{CDCl}_3$ )  $\delta = 159.55, 146.47, 142.71, 136.73, 134.17, 131.03, 129.12, 127.37, 127.15, 123.98, 123.97, 122.34, 121.95, 121.57, 120.36, 120.03, 119.28, 115.02, 111.14, 111.01, 55.15, 48.14, 17.54$ . MS(ES+):  $m/z = 343.30[\text{M}+\text{H}]^+$ , 236.17, 226.18.

**(6ss) 4-[1H-indol-3-yl(3,4-dichlorophenyl)methyl]-2-methylaniline.**  $\text{C}_{22}\text{H}_{18}\text{N}_2\text{Cl}_2$ . Yellow solid. M.P.: 66 °C. (Hexane/EtOAc 7:3). IR (KBr,  $\text{cm}^{-1}$ ): 3468 (s), 3415 (s), 3223 (m), 3057 (m), 3010 (s), 2976 (m), 2922 (w), 2868 (m), 1728 (w), 1620 (s), 1581 (m), 1504 (s), 1467 (s), 1456 (s), 1417 (m), 1392 (m), 1336 (s), 1309 (m), 1276 (m), 1265 (m), 1249 (m), 1130 (m), 1093 (m), 1047 (m), 1029 (s), 101 (m), 950 (w), 927 (w), 902 (m), 860 (m), 817 (m), 794 (s), 752 (br, s), 721 (m), 667 (s), 621 (m).  $^1\text{H}$  NMR (500 MHz,  $\text{CDCl}_3$ )  $\delta = 7.97$  (br s, 1 H), 7.36 (d,  $J = 8.2$  Hz, 1 H), 7.33 - 7.29 (m, 2 H), 7.21 (d,  $J = 7.9$  Hz, 1 H), 7.17 (ddd,  $J = 1.2, 7.0, 7.7$  Hz, 1 H), 7.05 (dd,  $J = 2.4$  Hz, 8.3 Hz, 1 H), 7.00 (ddd,  $J = 0.9, 7.0, 8.2$  Hz, 1 H), 6.88 (d,  $J = 2.1$  Hz, 1 H), 6.82 (dd,  $J = 2.1, 7.9$  Hz, 1 H), 6.60 (d,  $J = 7.9$  Hz, 1 H), 6.58 (dd,  $J = 1.2, 2.4$  Hz, 1 H), 5.48 (s, 1 H), 3.55 (br s, 2 H), 2.11 (s, 3 H).  $^{13}\text{C}$  NMR (126 MHz,  $\text{CDCl}_3$ )  $\delta = 145.20, 143.12, 136.75, 133.00, 132.17, 130.92, 130.82, 130.12, 129.92, 128.41, 127.29, 126.78, 124.04, 122.50, 122.26, 119.78, 119.55, 119.44, 115.07, 111.16, 47.31, 17.53$ . MS(ES+):  $m/z = 383.29[\text{M}+\text{H}]^+$ , 381.29, 276.10, 274.10, 266.10, 264.10.

**(6tt) 4-[1H-indol-3-yl(phenyl)methyl]-N,N-dimethylaniline.**  $\text{C}_{23}\text{H}_{22}\text{N}_2$ . White solid. M.P.: 162 °C. (Hexane/EtOAc 8.7:1.3). IR (KBr,  $\text{cm}^{-1}$ ): 3394 (s), 3082 (m), 3057 (m), 3047 (m), 3020 (m), 3001 (m), 2873 (m), 2810 (m), 1683 (m), 1610 (m), 1521 (s), 1506 (s), 1510 (m), 1456 (s), 1415 (m), 1357 (m), 1334 (m), 1328 (m), 1294 (w), 1236 (m), 1219 (m), 1201 (m), 1186 (w), 1166 (w), 1122 (w), 1093 (m), 1064 (w), 1055 (w), 1010 (w), 947 (w), 927 (w), 912 (w), 877 (w), 842 (w), 827 (w), 813 (w), 798 (s), 788 (m), 742 (s), 725 (s), 696 (s), 601 (m).  $^1\text{H}$  NMR (500 MHz,  $\text{CDCl}_3$ )  $\delta = 7.34$  (d,  $J = 7.9$  Hz, 1 H), 7.28 - 7.26 (m, 1 H), 7.25 - 7.22 (m, 4 H), 7.21 - 7.12 (m, 2 H), 7.09 (d,  $J = 8.5$  Hz, 2 H), 6.97 (ddd,  $J = 0.9, 7.0, 7.9$  Hz, 1 H), 6.67 (d,  $J = 8.5$  Hz, 2 H), 6.58 (dd,  $J = 1.1, 2.3$  Hz, 1 H), 5.58 (s, 1 H), 2.91 (s, 6 H). MS(ES+):  $m/z = 327.10[\text{M}+\text{H}]^+$ , 312.07, 235.13, 219.79, 204.17.

**(6uu) 4-[1H-indol-3-yl(4-methylphenyl)methyl]-N,N-dimethylaniline.**  $\text{C}_{24}\text{H}_{24}\text{N}_2$ . Yellow-brown solid. M.P.: 162 °C. (Hexane/EtOAc 8.7:1.3). IR (KBr,  $\text{cm}^{-1}$ ): 3396 (m), 3207 (br, m), 3059 (m), 3047 (m), 3018 (m), 2995 (m), 2914 (m), 2891 (m), 2858 (m), 2816 (m), 1683 (m), 1616 (m), 1608 (m), 1516 (m), 1506 (s), 1456 (s), 1417 (m), 1357 (m), 1338 (m), 1317 (m), 1296 (w), 1236 (w), 1219 (m), 1199 (m), 1182 (w), 1161 (w), 1136 (m), 1122 (m), 1093 (m), 1055 (m), 1022 (w), 1008 (m), 941 (w), 925 (w), 856 (m), 835 (m), 800 (m), 773 (m), 761 (m), 734 (m), 630 (w).  $^1\text{H}$  NMR (500 MHz,  $\text{CDCl}_3$ )  $\delta = 7.91$  (br s, 1 H), 7.33 (d,  $J = 8.2$  Hz, 1 H), 7.26 (d,  $J = 7.9$  Hz, 1 H), 7.16 - 7.04 (m, 7 H), 6.97 (t,  $J = 7.5$  Hz, 1 H), 6.60 (d,  $J = 8.5$  Hz, 1 H), 5.54 (s, 1 H), 2.90 (s, 6 H), 2.31 (s, 3 H).

**(6vv) 4-[1H-indol-3-yl(4-bromophenyl)methyl]-N,N-dimethylaniline.**  $\text{C}_{23}\text{H}_{21}\text{N}_2\text{Br}$ . White solid. M.P.: 162 °C. (Hexane/EtOAc 8:2). IR (KBr,  $\text{cm}^{-1}$ ): 3402 (m), 3213 (m), 3182 (m), 3105 (m), 3070 (m), 3059 (m), 3039 (m), 3014 (m), 2985 (m), 2962 (m), 2887 (m), 2848 (m), 2802 (m), 1734 (w), 1683 (m), 1614 (m), 1516 (s), 1506 (s), 1481 (m), 1471 (m), 1456 (s), 1398 (w), 1338 (m), 1321 (m), 1280 (w), 1242 (w), 1219 (m), 1199 (m), 1184 (w), 1159 (w), 1136 (m), 1095 (m), 1070 (m), 1051 (m), 1014 (m), 1008 (m), 941 (m), 929 (w), 858 (w), 839 (w), 815 (m), 806 (m), 798 (s), 788 (s), 765 (m), 742 (s), 669 (w), 617 (m).  $^1\text{H}$  NMR (500 MHz,  $\text{CDCl}_3$ )  $\delta = 7.93$  (br s, 1 H), 7.37 (d,  $J = 8.2$  Hz, 2 H), 7.34 (d,  $J = 7.9$  Hz, 1 H), 7.22 (d,  $J = 7.9$  Hz, 1 H), 7.16 (ddd,  $J = 0.9, 7.2, 7.9$  Hz, 1 H), 7.10 (d,  $J = 8.2$  Hz, 2 H), 7.05 (d,  $J = 8.5$  Hz, 2 H), 6.99 (ddd,  $J = 0.9, 7.2, 8.2$  Hz, 1 H), 6.67 (d,  $J = 8.5$  Hz, 2 H), 6.57 (dd,  $J = 1.1, 2.3$  Hz, 1 H), 5.53 (s, 1 H), 2.92 (s, 6 H).  $^{13}\text{C}$  NMR (126 MHz,  $\text{CDCl}_3$ )  $\delta = 147.28, 136.29, 136.25(s), 133.91, 129.11, 127.81, 121.67, 121.61, 120.80, 120.25, 119.73, 119.64, 119.07, 118.99, 112.44, 110.98, 48.99, 31.00$ . MS(ES+):  $m/z = 407.28[\text{M}+\text{H}]^+$ , 405.22, 290.16, 284.22, 257.33, 251.20, 158.07.

**(6ww) 4-[(1-methyl-1H-indol-3-yl)(phenyl)methyl]-N-methylaniline.** C<sub>23</sub>H<sub>22</sub>N<sub>2</sub>. White solid. M.P.: 36 °C. (Hexane/EtOAc 9.5:0.5). IR (KBr, cm<sup>-1</sup>): 3412 (m), 3049 (m), 3003 (m), 2924 (m), 2875 (m), 2854 (m), 2819 (w), 1614 (m), 1549 (w), 1519 (s), 1510 (m), 1483 (m), 1471 (m), 1423 (w), 1371 (m), 1345 (w), 1327 (m), 1323 (m), 1269 (w), 1217 (m), 1180 (w), 1153 (m), 1130 (w), 1118 (w), 1055 (w), 1012 (w), 852 (w), 810 (m), 796 (m), 752 (s), 740 (s), 667 (m). <sup>1</sup>H NMR (500 MHz, CDCl<sub>3</sub>) δ = 7.27 (d, *J* = 8.2 Hz, 1 H), 7.24 (d, *J* = 7.9 Hz, 1 H), 7.16 (ddd, *J* = 0.9, 7.0, 7.6 Hz, 1 H), 7.12 (d, *J* = 7.9 Hz, 2 H), 7.06 (d, *J* = 7.9 Hz, 2 H), 7.03 (d, *J* = 8.5 Hz, 2 H), 6.95 (ddd, *J* = 0.9, 6.9 Hz, 8.0 Hz, 1 H), 6.54 (d, *J* = 8.5 Hz, 1 H), 6.42 (d, *J* = 0.9 Hz, 1 H), 5.52 (s, 1 H), 3.68 (s, 3 H), 3.67 (s, 1 H), 2.81 (s, 3 H), 2.31 (s, 3 H). <sup>13</sup>C NMR (126 MHz, CDCl<sub>3</sub>) δ = 147.71, 142.13, 137.61, 135.45, 133.45, 129.81, 129.08, 129.05, 128.99, 127.71, 121.64, 120.37, 119.37, 118.86, 112.48, 109.19, 47.74, 32.71, 30.93, 21.25. MS(ES<sup>+</sup>): *m/z* = 341.30[M+H]<sup>+</sup>, 234.17, 210.18.

**(6xx) 4-[(1-methyl-1H-indol-3-yl)(4-nitrophenyl)methyl]-N-methylaniline.** C<sub>23</sub>H<sub>21</sub>N<sub>3</sub>O<sub>2</sub>. Orange-brown solid. M.P.: 61 °C. (Hexane/EtOAc 8.5:1.5). IR (KBr, cm<sup>-1</sup>): 3419 (m), 3101 (w), 3049 (m), 3018 (s), 2929 (m), 2881 (m), 2814 (m), 1614 (s), 1602 (s), 1519 (s), 1485 (s), 1471 (s), 1423 (m), 1371 (m), 1342 (s), 1269 (m), 1217 (m), 1184 (m), 1155 (m), 1132 (m), 1109 (m), 1058 (m), 1014 (m), 925 (w), 871 (m), 850 (m), 806 (m), 742 (s), 709 (m), 698 (m), 667 (m), 628 (w), 603 (w). <sup>1</sup>H NMR (500 MHz, CDCl<sub>3</sub>) δ = 8.11 (d, *J* = 8.9 Hz, 2 H), 7.42 (d, *J* = 8.9 Hz, 2 H), 7.30 (d, *J* = 8.2 Hz, 1 H), 7.21 (ddd, *J* = 1.2, 7.0, 7.9 Hz, 1 H), 7.16 (d, *J* = 7.9 Hz, 1 H), 7.03 - 6.96 (m, 3 H), 6.55 (d, *J* = 8.5 Hz, 2 H), 6.42 (d, *J* = 0.9 Hz, 1 H), 5.64 (s, 1 H), 3.71 (s, 3 H), 3.69 (br s, 1 H), 2.82 (s, 3 H). <sup>13</sup>C NMR (126 MHz, CDCl<sub>3</sub>) δ = 152.74, 148.05, 146.31, 137.49, 131.12, 129.66, 129.61, 128.70, 127.03, 123.48, 121.85, 119.70, 119.04, 117.44, 112.43, 109.29, 47.87, 32.67, 30.72. MS(ES<sup>+</sup>): *m/z* = 372.26[M+H]<sup>+</sup>, 257.33, 241.14.

[1] Using the secondary amine – *N*-Methylaniline

1.1 Benzaldehyde (1a) + indole (2a) + *N*-methylaniline (3a): (6a) 4-[1*H*-indol-3-yl(phenyl)methyl]-*N*-methylaniline

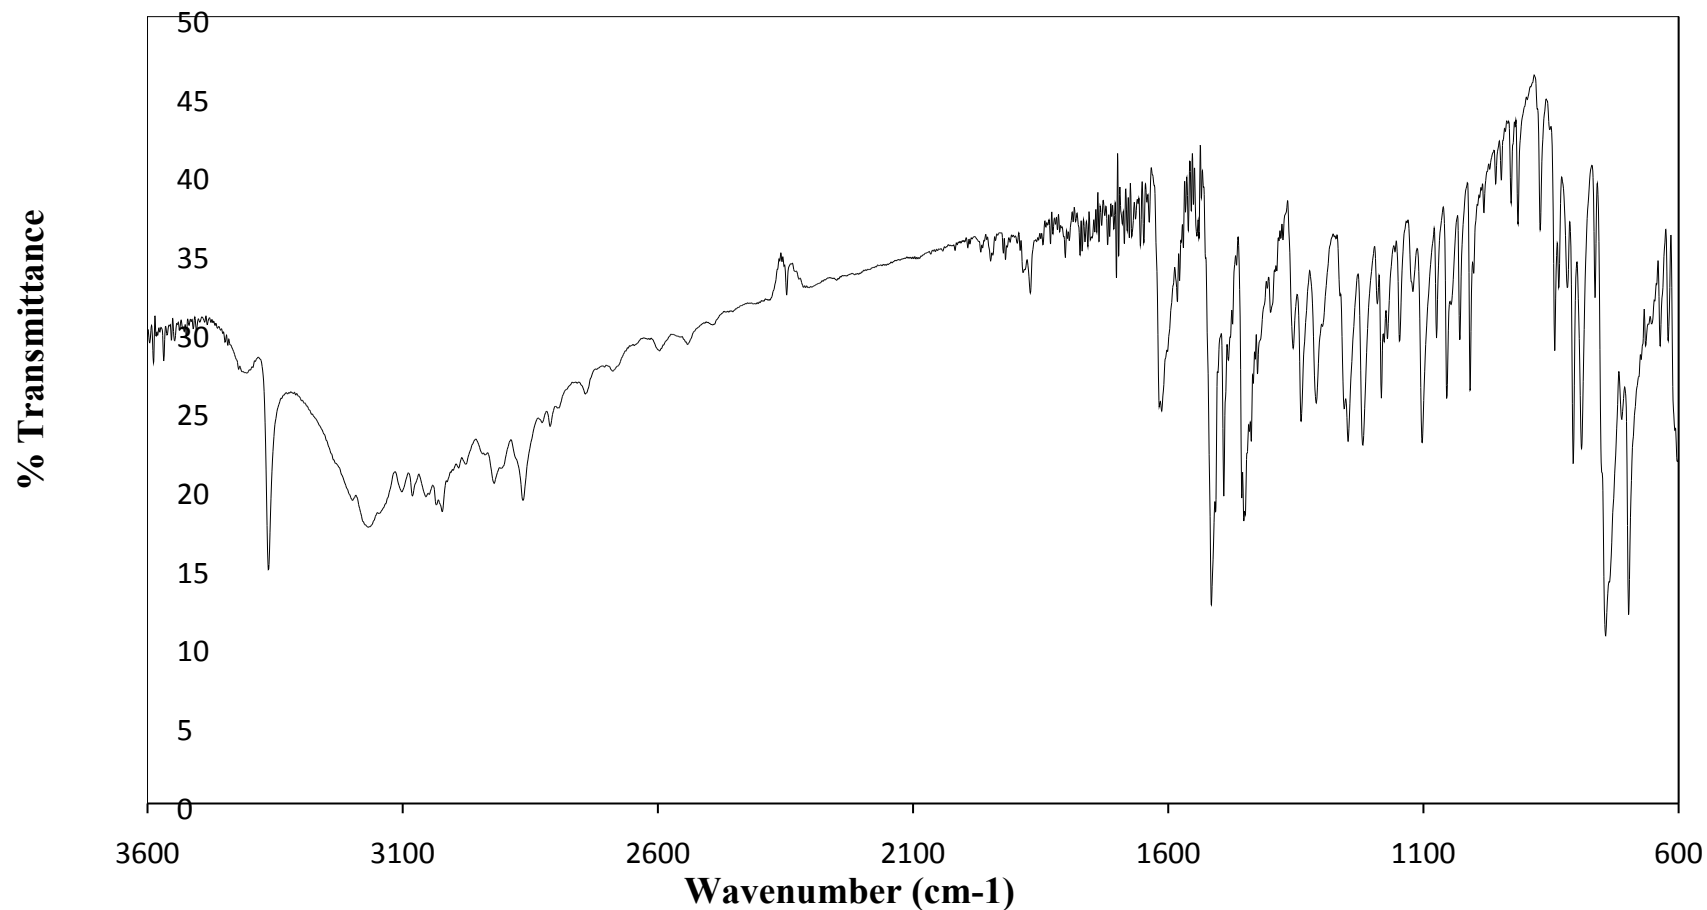

IR (KBr,  $\text{cm}^{-1}$ ): 3402 (w), 3363 (m), 3201 (m), 3163 (m), 3101 (m), 3080 (m), 3055 (m), 3022 (m), 2920 (m), 2864 (m), 1612 (m), 1516 (s), 1490 (s), 1452 (s), 1340 (m), 1309 (m), 1247 (m), 1219 (m), 1182 (w), 1145 (w), 1103 (m), 1055 (m), 1008 (m), 914 (w), 871 (w), 842 (m), 806 (m), 790 (m), 742 (s), 698 (s).

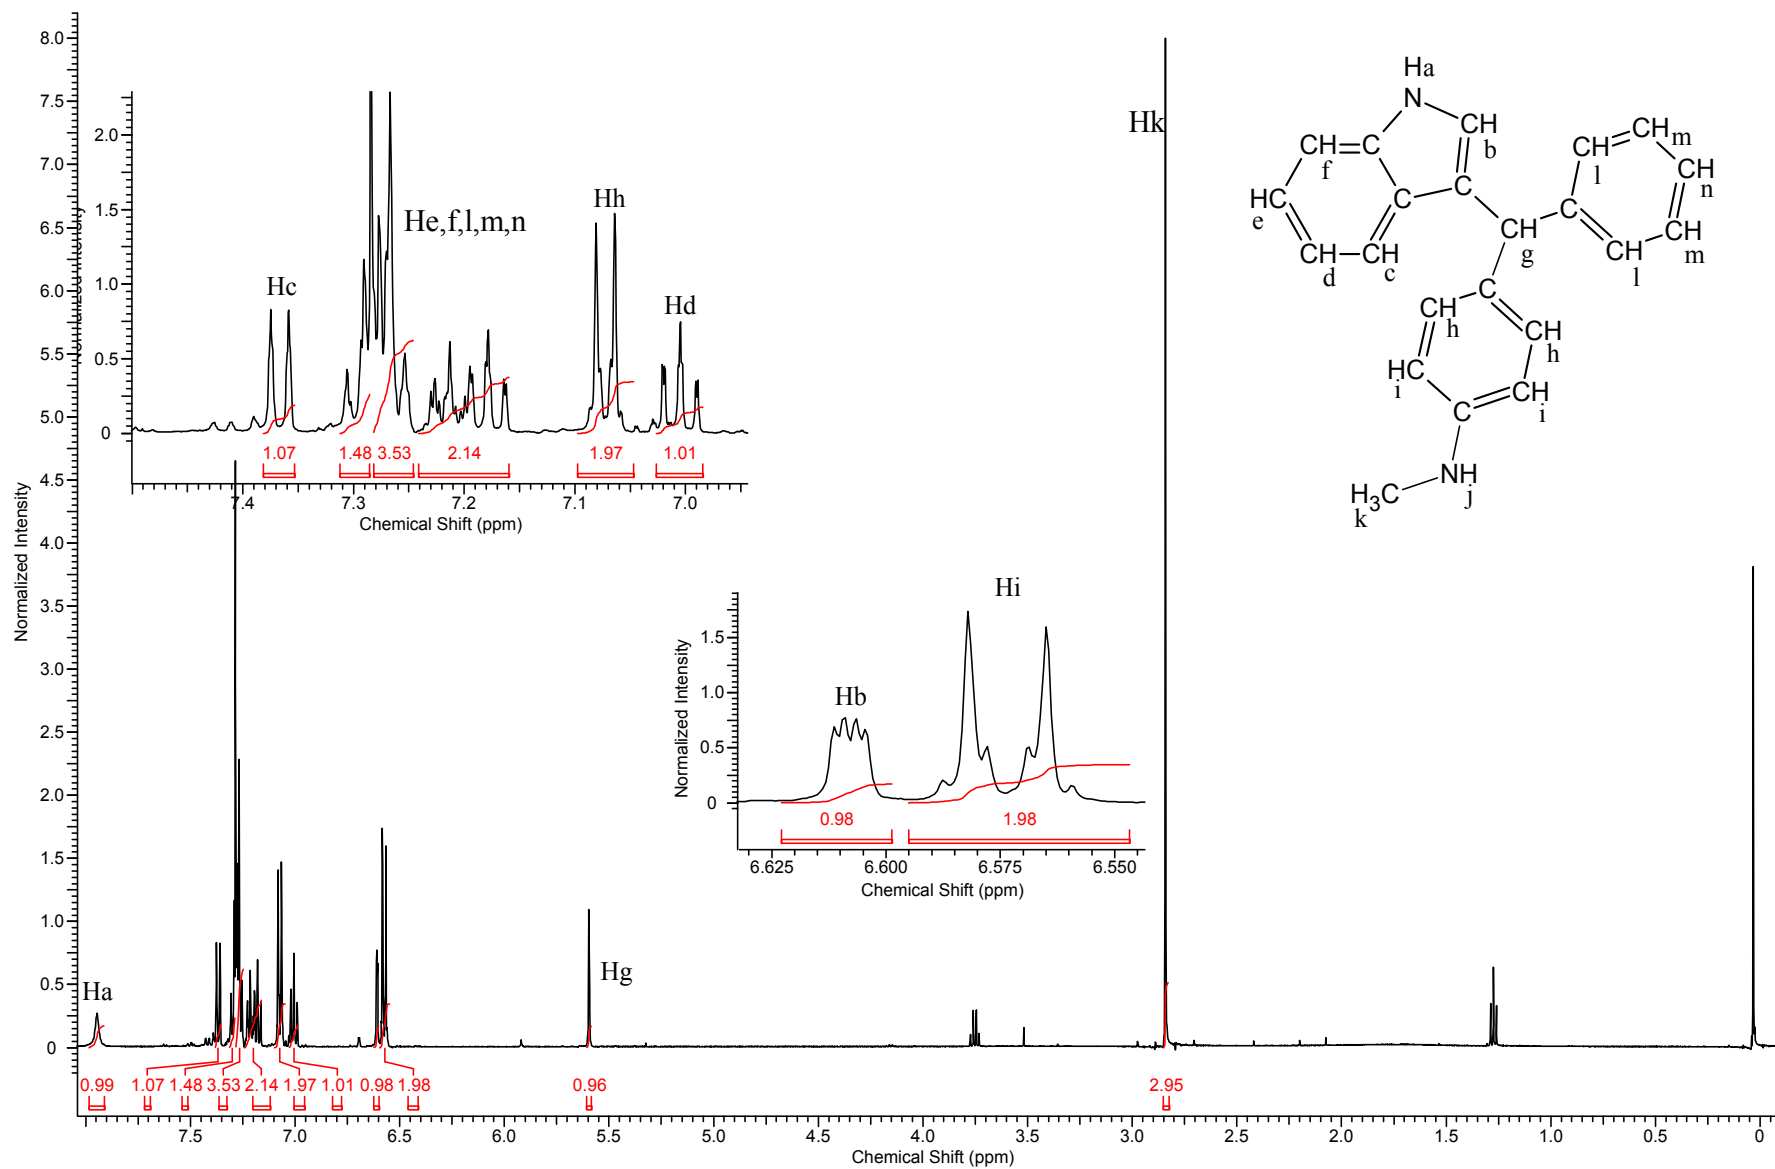

<sup>1</sup>H NMR (500MHz, CDCl<sub>3</sub>)  $\delta$  = 7.95 (br s, 1 H), 7.37 (d,  $J$  = 8.2 Hz, 1 H), 7.32 - 7.15 (m, 7 H), 7.07 (d,  $J$  = 8.5 Hz, 2 H), 7.00 (ddd,  $J$  = 8.2, 7.2, 0.9 Hz, 1 H), 6.61 (dd,  $J$  = 1.1, 2.3 Hz, 1 H), 6.57 (d,  $J$  = 8.5 Hz, 2 H), 5.60 (s, 1 H), 2.84 (s, 3 H).

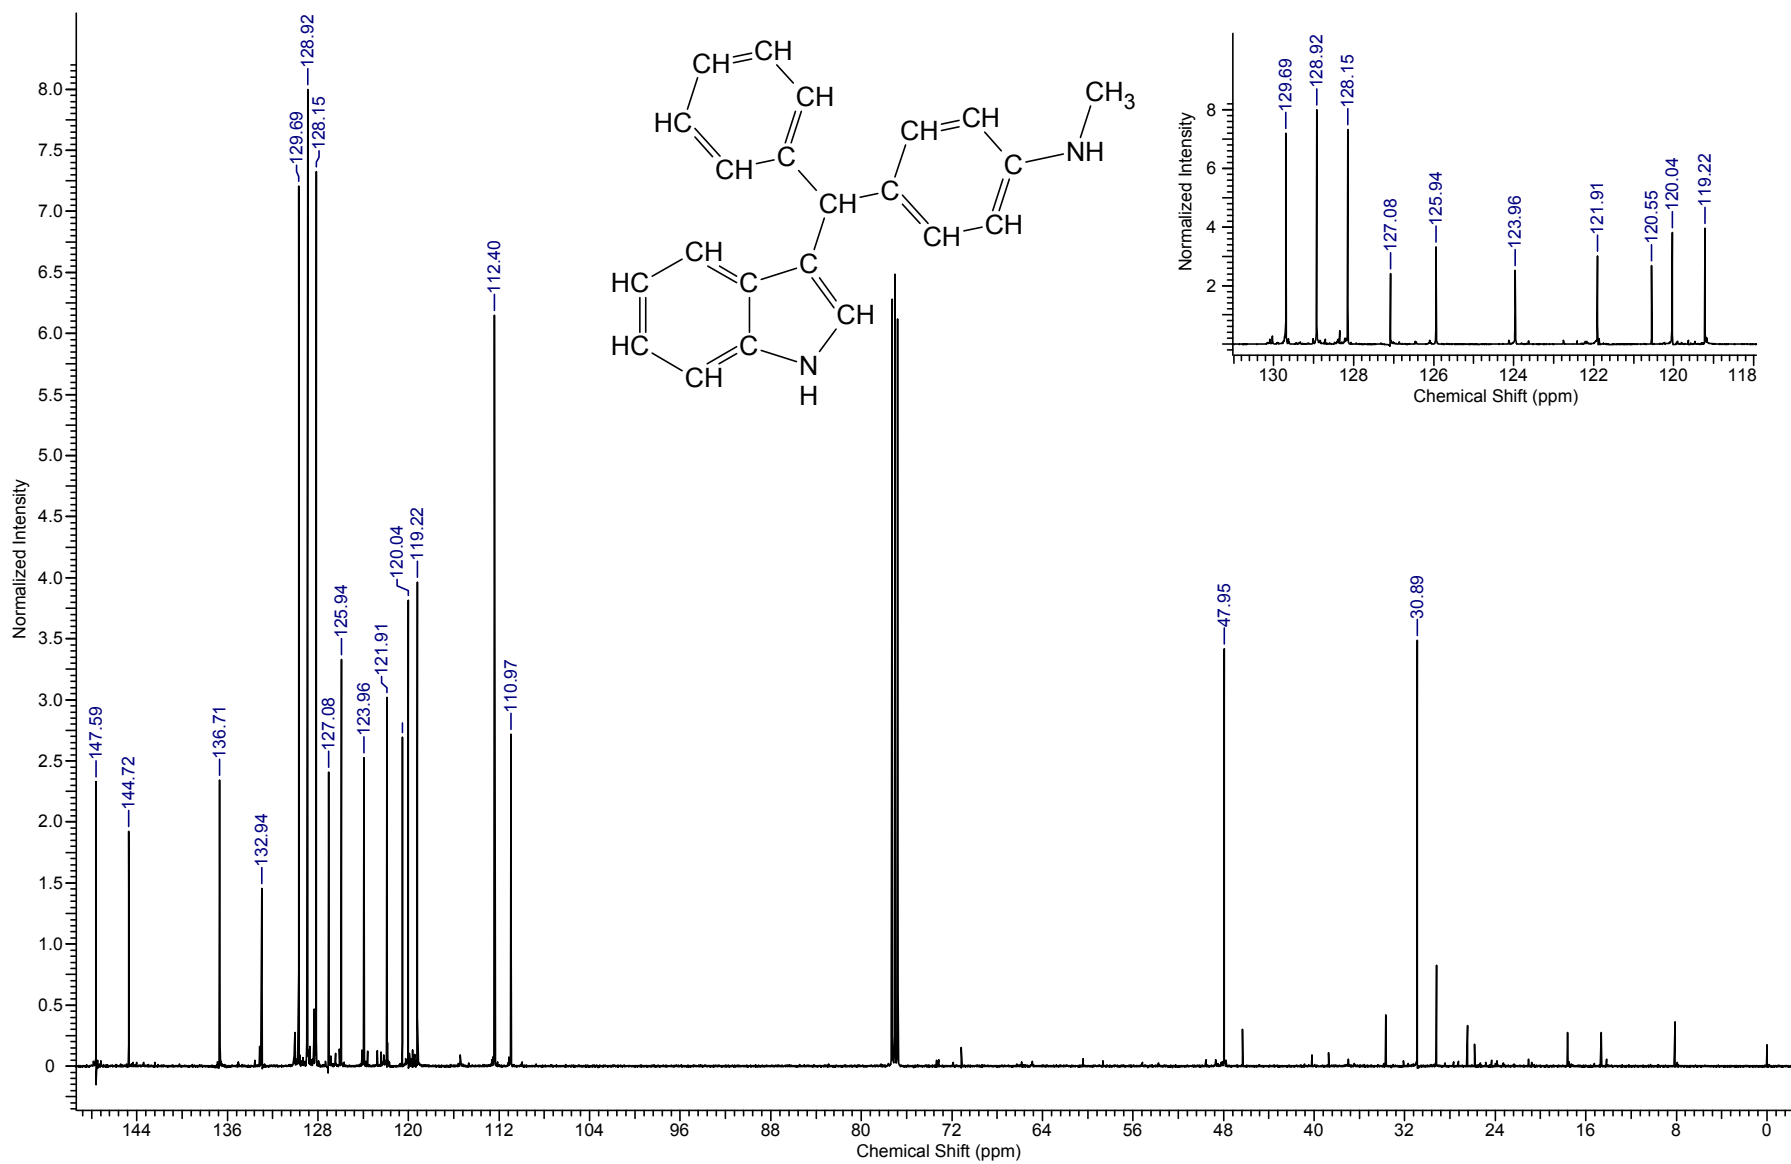

<sup>13</sup>C NMR (126 MHz, CDCl<sub>3</sub>) δ = 147.59, 144.72, 136.71, 132.94, 129.69, 128.92, 128.15, 127.08, 125.94, 123.96, 121.91, 120.55, 120.04, 119.22, 112.40, 110.97, 47.95, 30.89.

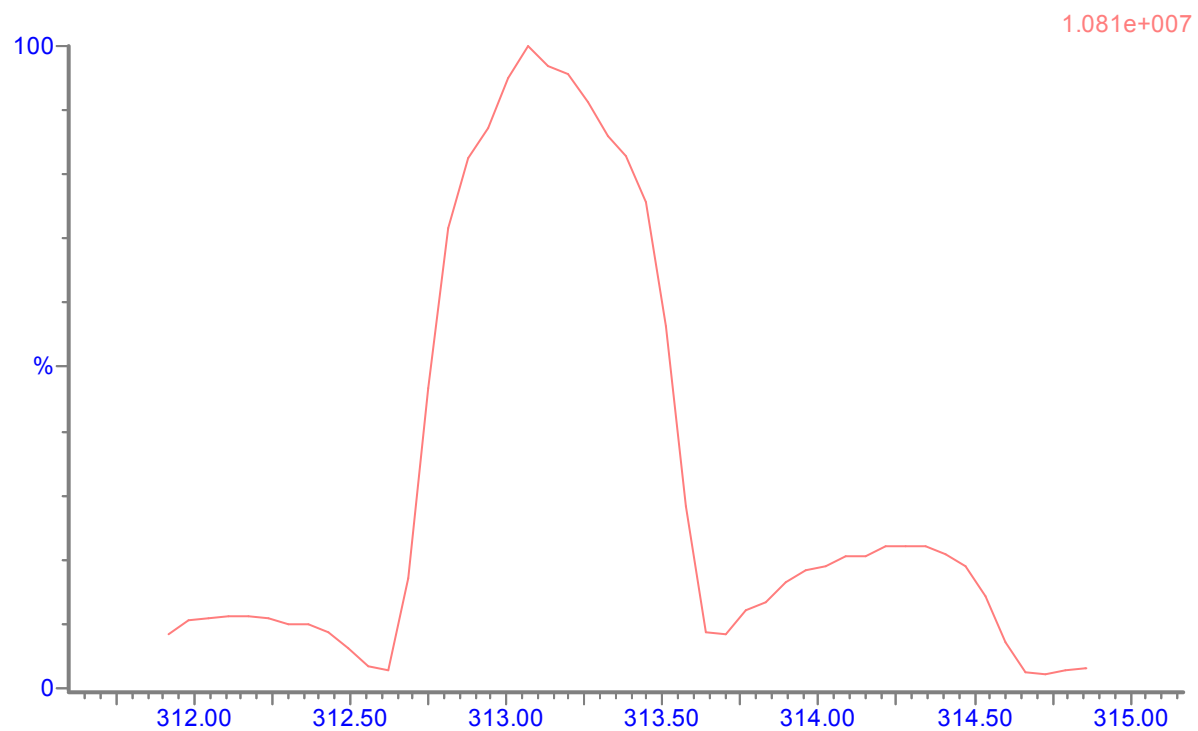

| Formula Mass | Daughter number | Parent m/z | Cone Voltage (V) | Daughters | Collision Energy (eV) | Ion Mode |
|--------------|-----------------|------------|------------------|-----------|-----------------------|----------|
| 312.41       | 1               | 313.11     | 44               | 221.08    | 32                    | ES+      |
|              | 2               | 313.11     | 44               | 298.09    | 20                    | ES+      |
|              | 3               | 313.11     | 44               | 196.10    | 20                    | ES+      |
|              | 4               | 313.11     | 44               | 204.10    | 52                    | ES+      |
|              | 5               | 313.11     | 44               | 180.10    | 50                    | ES+      |

**1.2 4-methylbenzaldehyde (1b) + indole (2a) + N-methylaniline (3a): (6b) 4-[1H-indol-3-yl(4-methylphenyl)methyl]-N-methylaniline.**

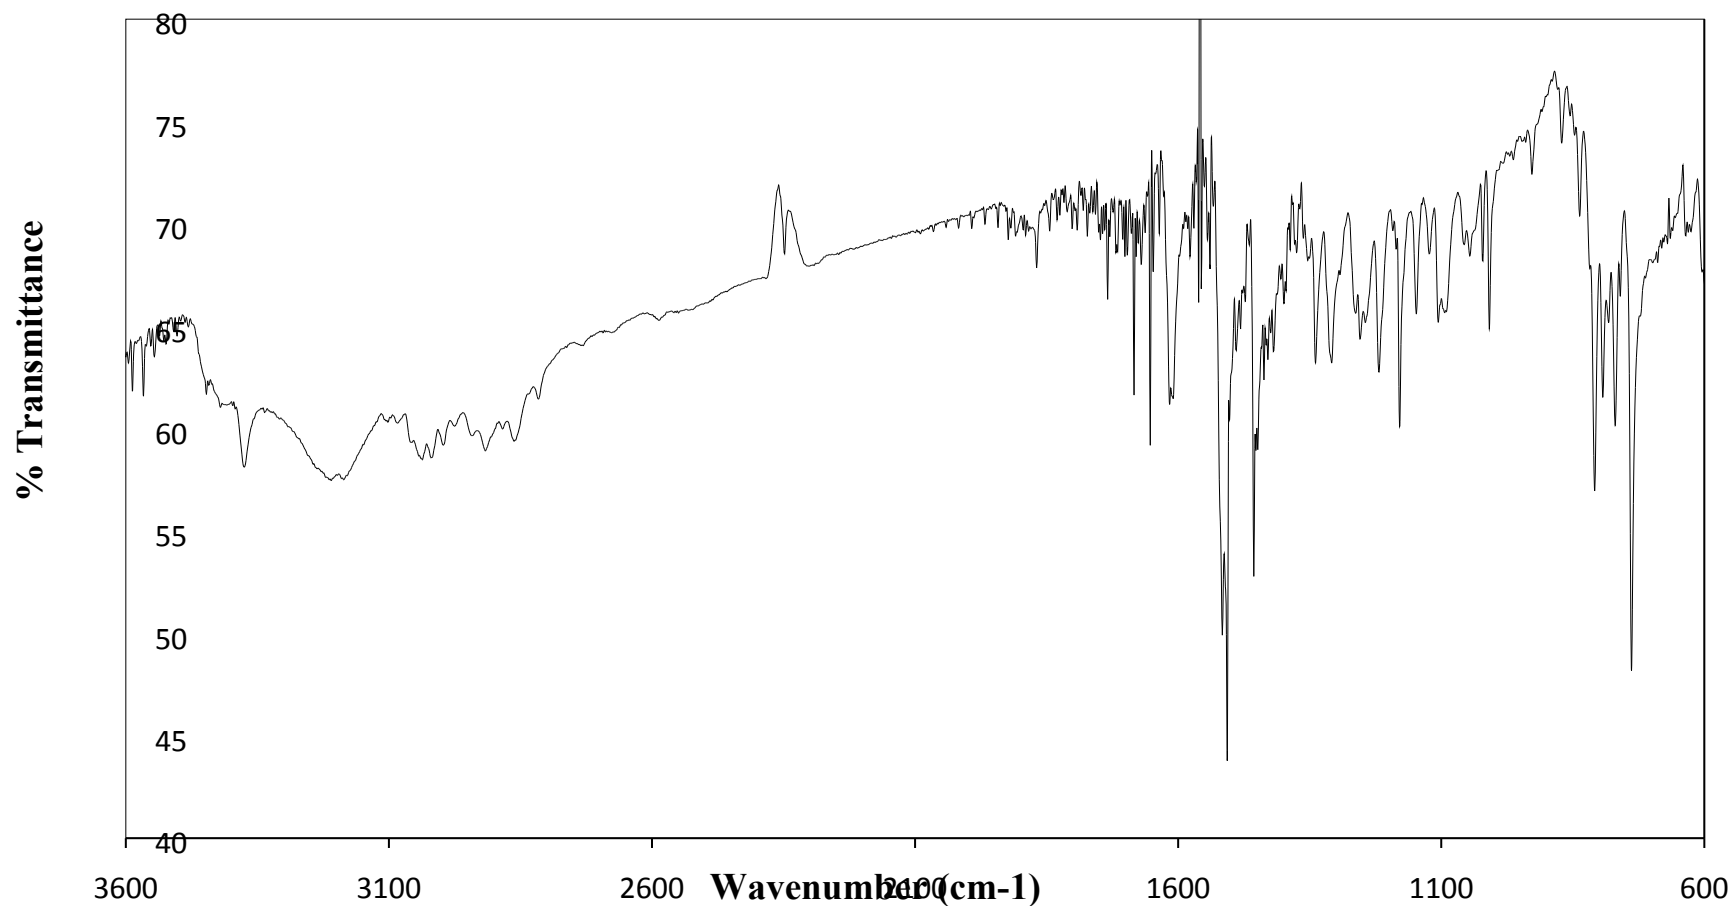

IR (KBr,  $\text{cm}^{-1}$ ): 3419 (w), 3375 (w), 3212 (w), 3186 (w), 3059 (w), 3039 (w), 3018 (w), 2997 (w), 2993 (w), 2941 (w), 2918 (w), 2862 (w), 2814 (w), 1683 (m), 1652 (m), 1616 (m), 1516 (s), 1506 (s), 1456 (m), 1338 (w), 1307 (w), 1253 (w), 1219 (w), 1178 (w), 1147 (w), 1093 (w), 1008 (w), 808 (m), 792 (w), 769 (w), 738 (s).

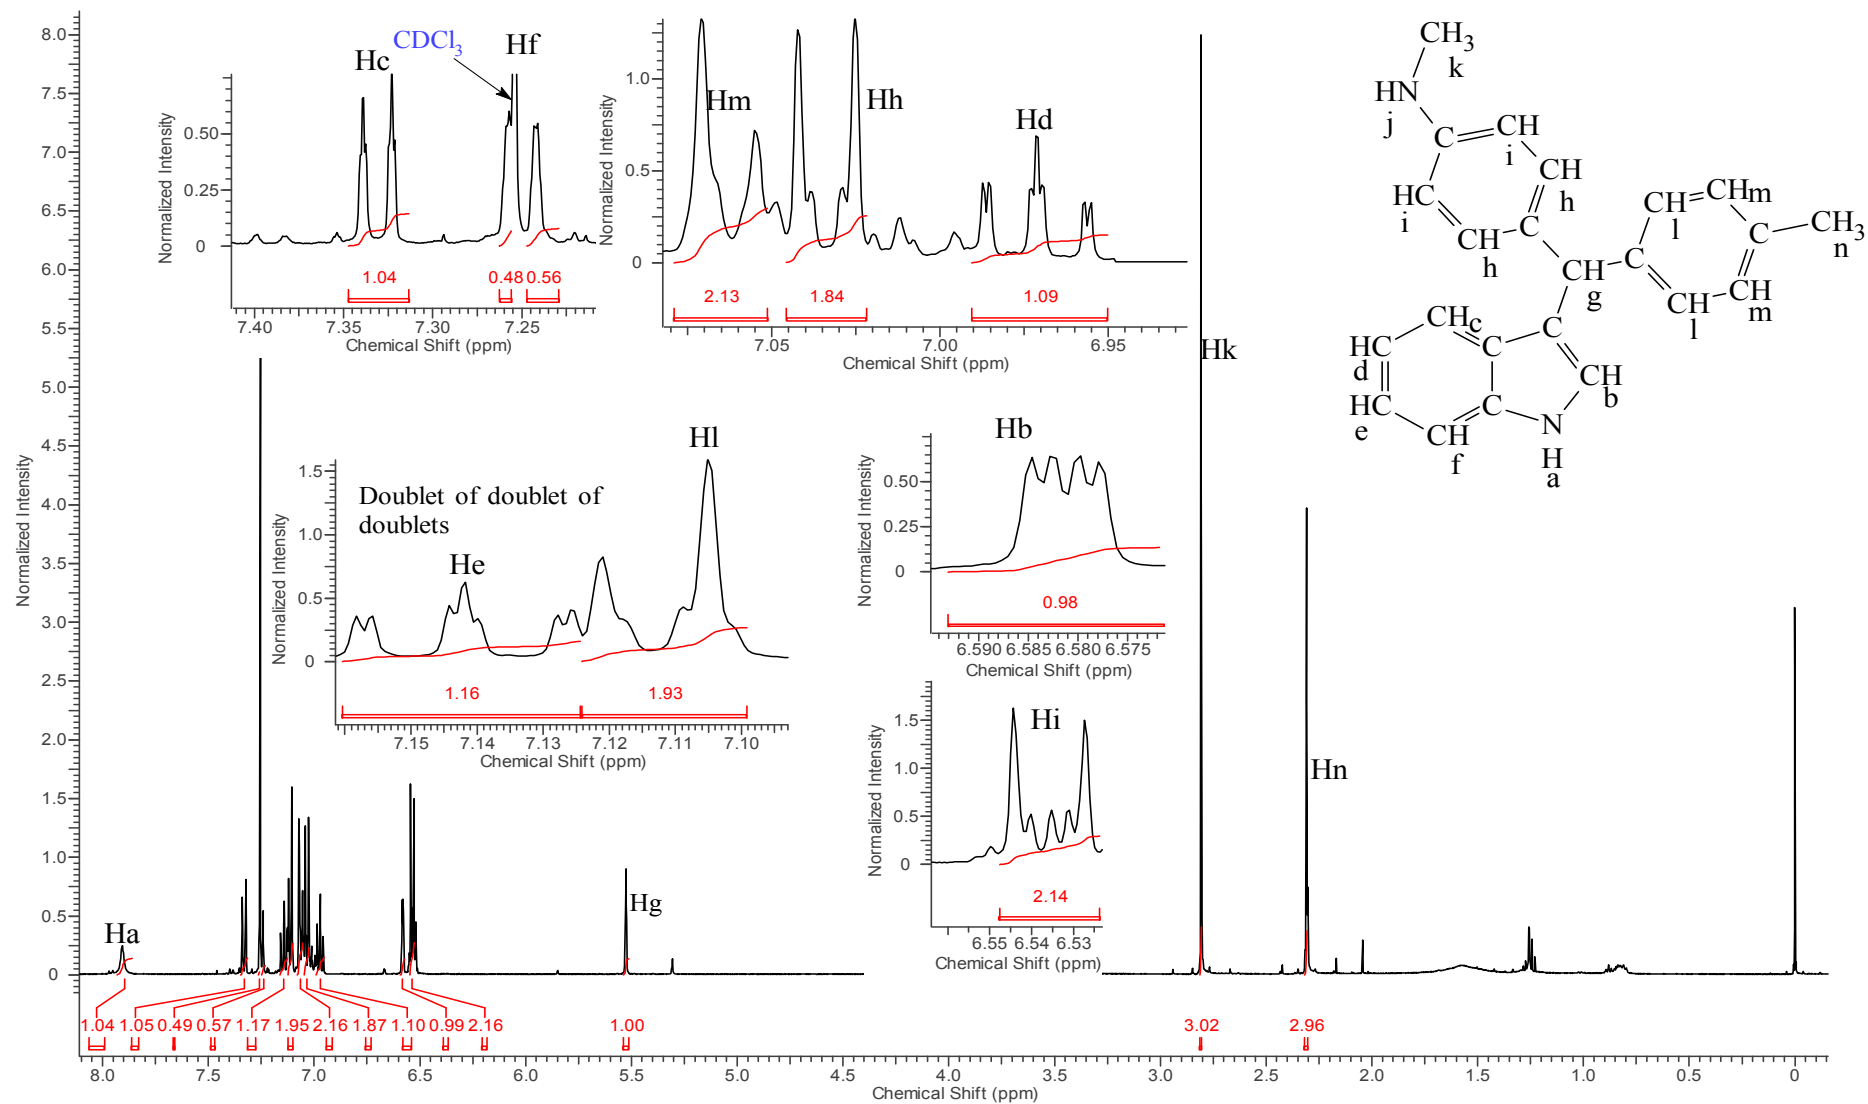

<sup>1</sup>H NMR (500 MHz, CDCl<sub>3</sub>) δ = 7.91 (br s, 1 H), 7.33 (d, *J* = 8.2 Hz, 1 H), 7.25 (d, *J* = 7.9 Hz, 1 H), 7.14 (ddd, *J* = 0.9, 7.0, 7.9 Hz, 1H), 7.11 (d, *J* = 7.9 Hz, 2H), 7.06 (d, *J* = 7.9 Hz, 2H), 7.03 (d, *J* = 8.5 Hz, 2H), 6.97 (ddd, *J* = 0.9, 7.0, 8.2 Hz, 1 H), 6.58 (dd, *J* = 0.9, 2.4 Hz, 1H), 6.54 (d, *J* = 8.5 Hz, 2H), 5.53 (s, 1 H), 2.81 (s, 3 H), 2.31 (s, 3 H).



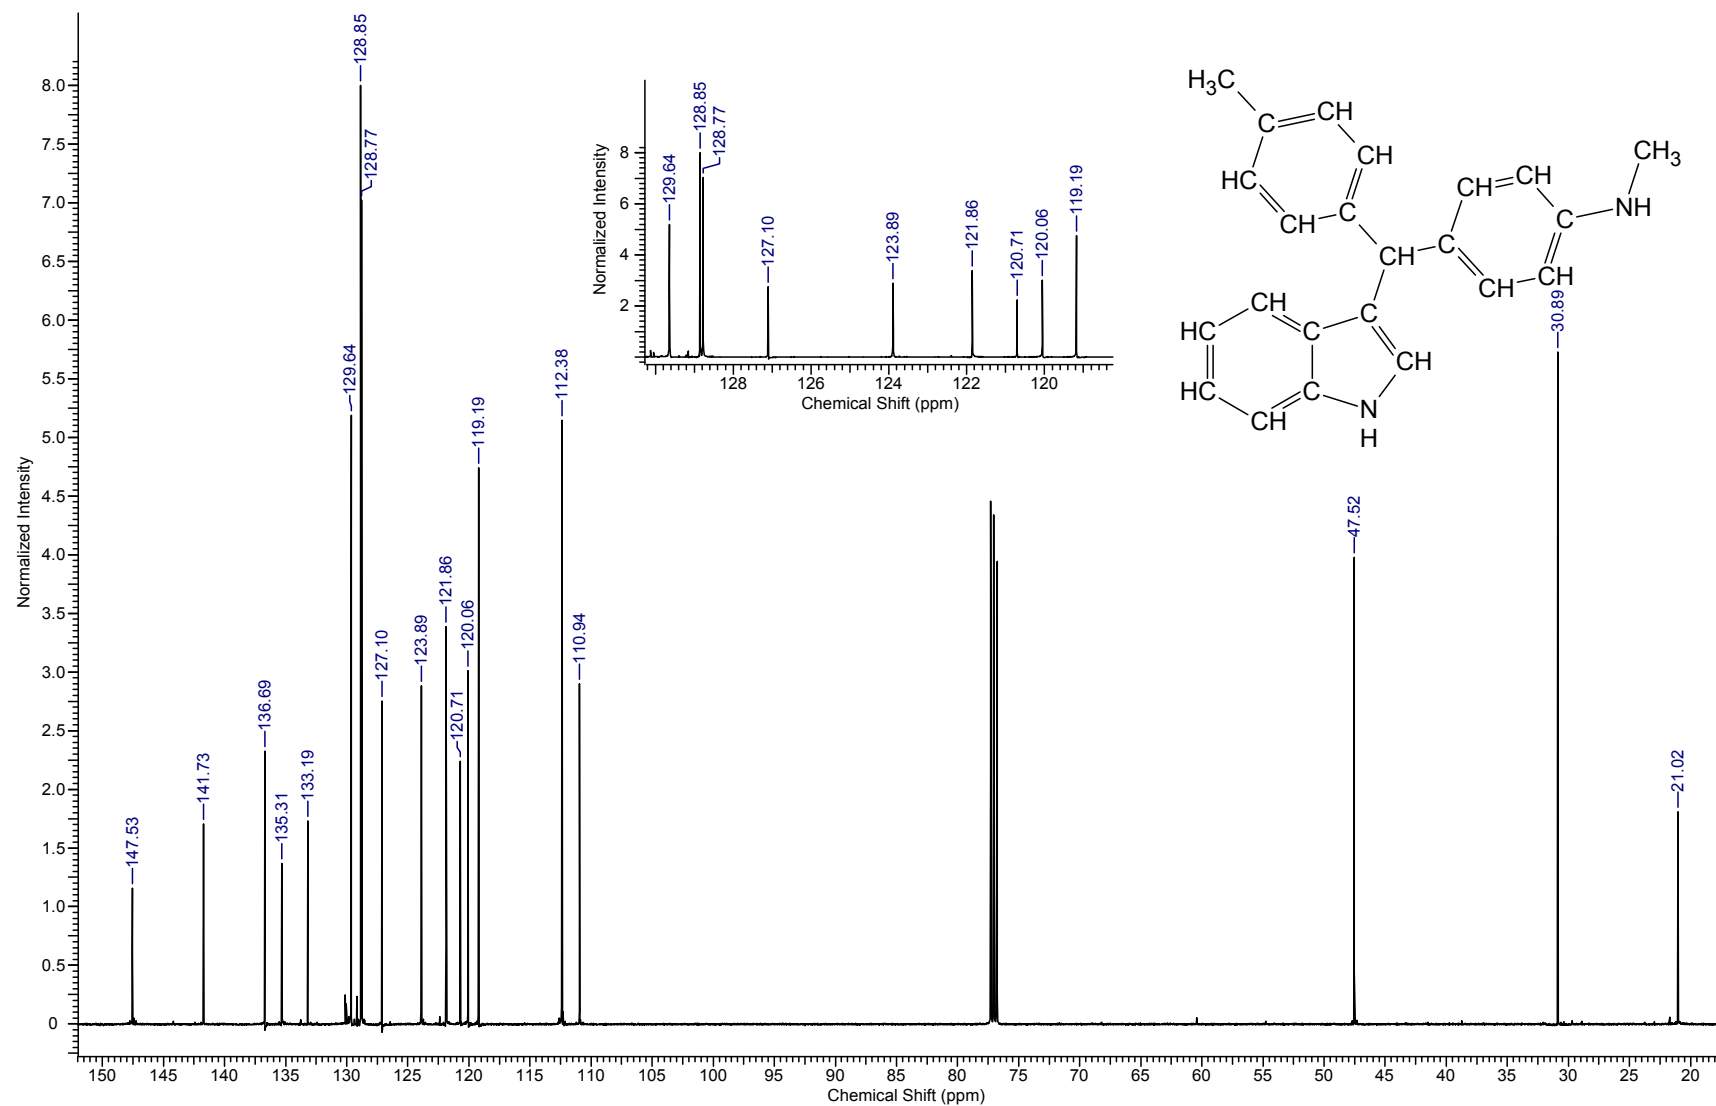

$^{13}\text{C}$  NMR (126 MHz,  $\text{CDCl}_3$ )  $\delta$  = 147.53, 141.73, 136.69, 135.31, 133.19, 129.64, 128.85, 128.77, 127.10, 123.89, 121.86, 120.71, 120.06, 119.19, 112.38, 110.94, 47.52, 30.89, 21.02.

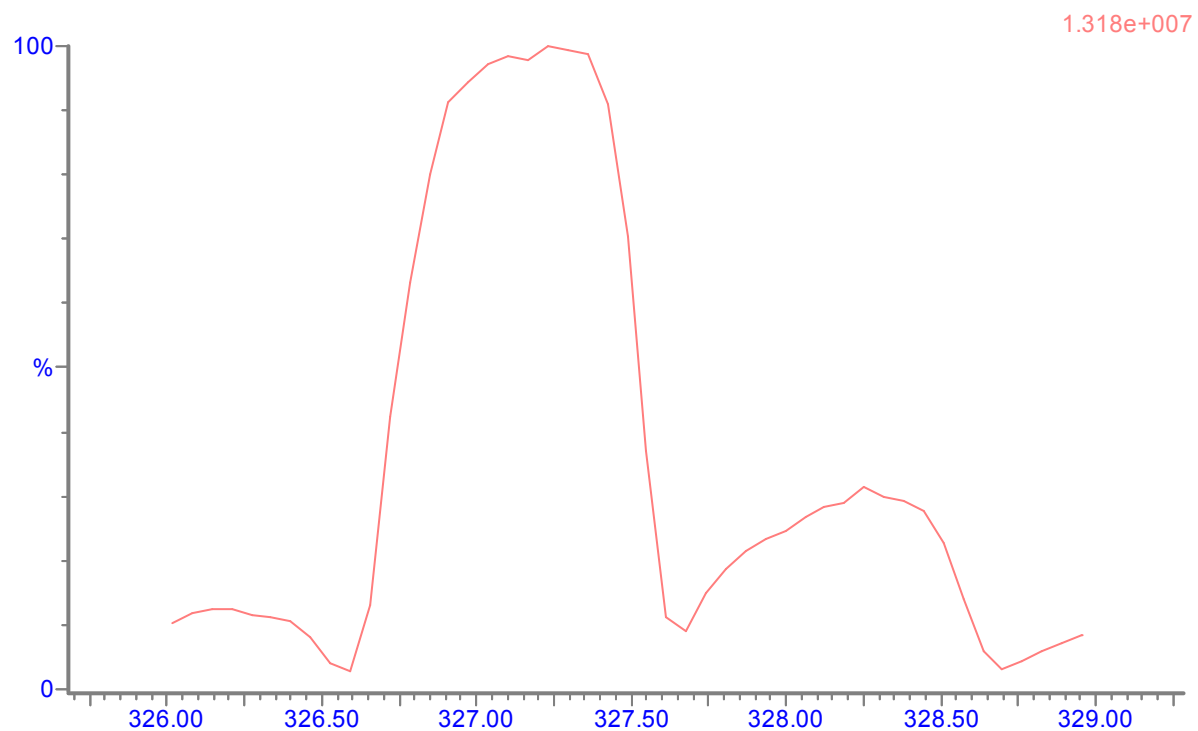

| Formula Mass | Daughter number | Parent m/z | Cone Voltage (V) | Daughters | Collision Energy (eV) | Ion Mode |
|--------------|-----------------|------------|------------------|-----------|-----------------------|----------|
| 326.43       | 1               | 327.15     | 44               | 220.88    | 32                    | ES+      |
|              | 2               | 327.15     | 44               | 312.06    | 22                    | ES+      |
|              | 3               | 327.15     | 44               | 210.15    | 22                    | ES+      |
|              | 4               | 327.15     | 44               | 204.03    | 58                    | ES+      |
|              | 5               | 327.15     | 44               | 297.04    | 32                    | ES+      |

**1.3 3-methylbenzaldehyde (1c) + indole (2a) + N-methylaniline (3a): (6c) 4-[1H-indol-3-yl(4-methylphenyl)methyl]-N-methylaniline**

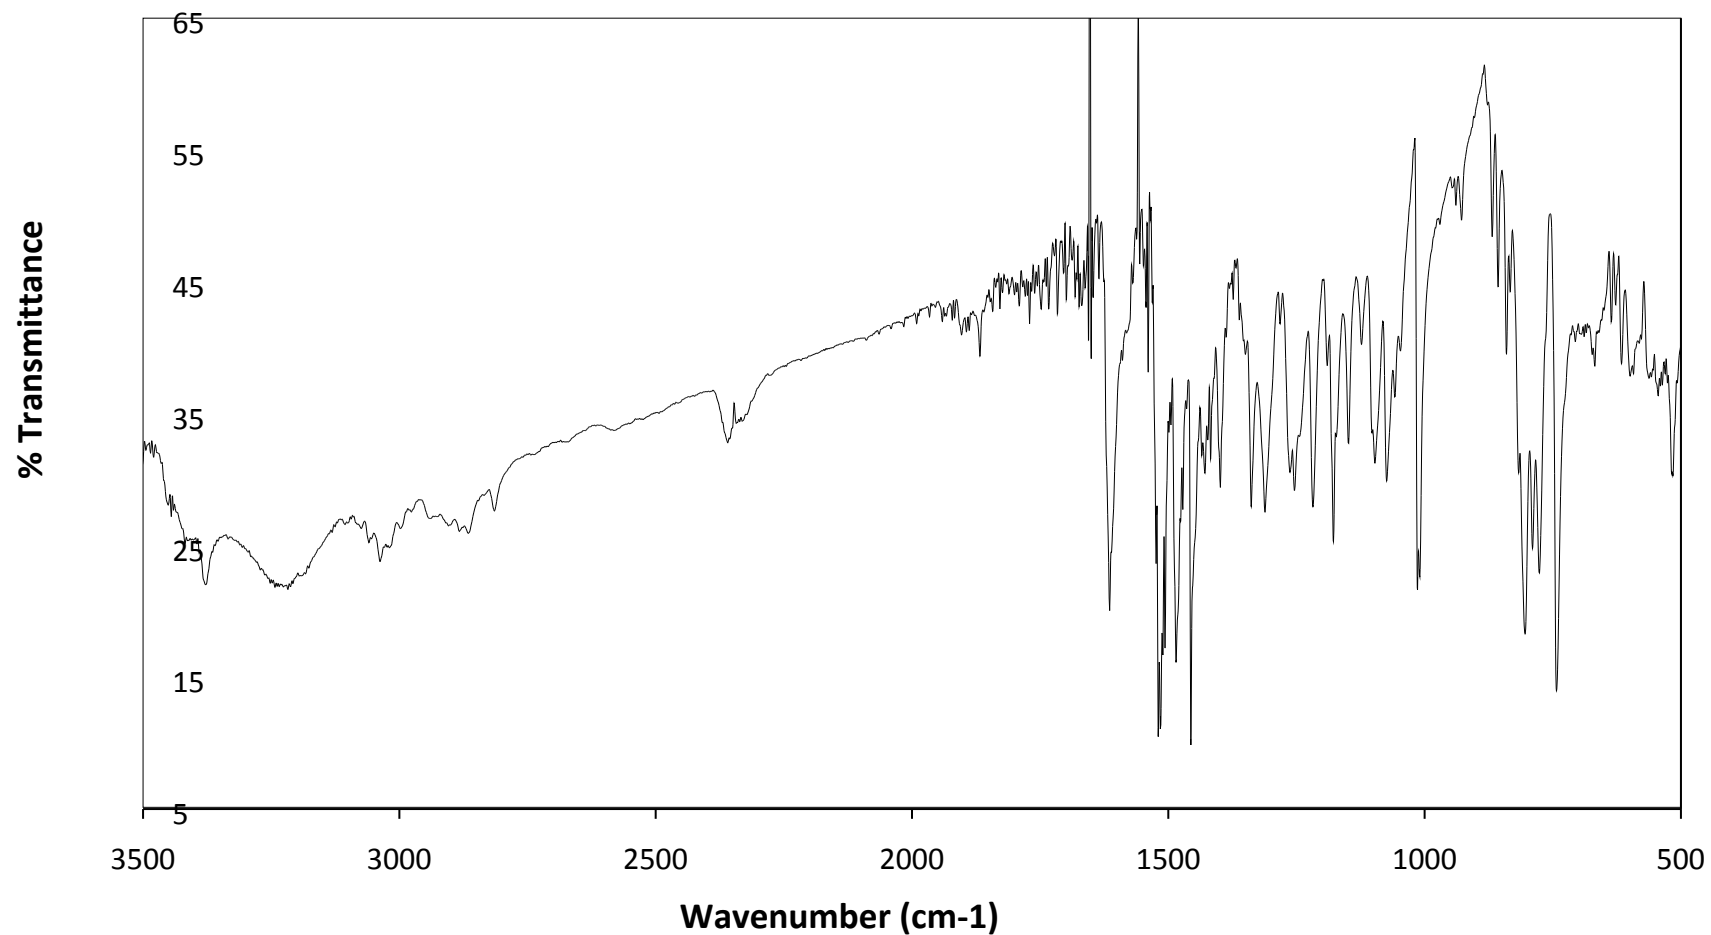

IR (KBr,  $\text{cm}^{-1}$ ): 3417 (m), 3379 (m), 3234 (br, m), 3101 (m), 3074 (m), 3059 (m), 3037 (m), 3018 (m), 2997 (m), 2985 (m), 2943 (m), 2910 (m), 2883 (m), 2866 (m), 1614 (m), 1519 (s), 1485 (m), 1456 (s), 1398 (m), 1338 (m), 1311 (m), 1253 (m), 1217 (m), 1178 (m), 1149 (m), 1097 (m), 1074 (m), 1014 (m), 840 (w), 804 (s), 788 (m), 775 (m), 742 (s), 667 (w), 615 (w), 597 (w).

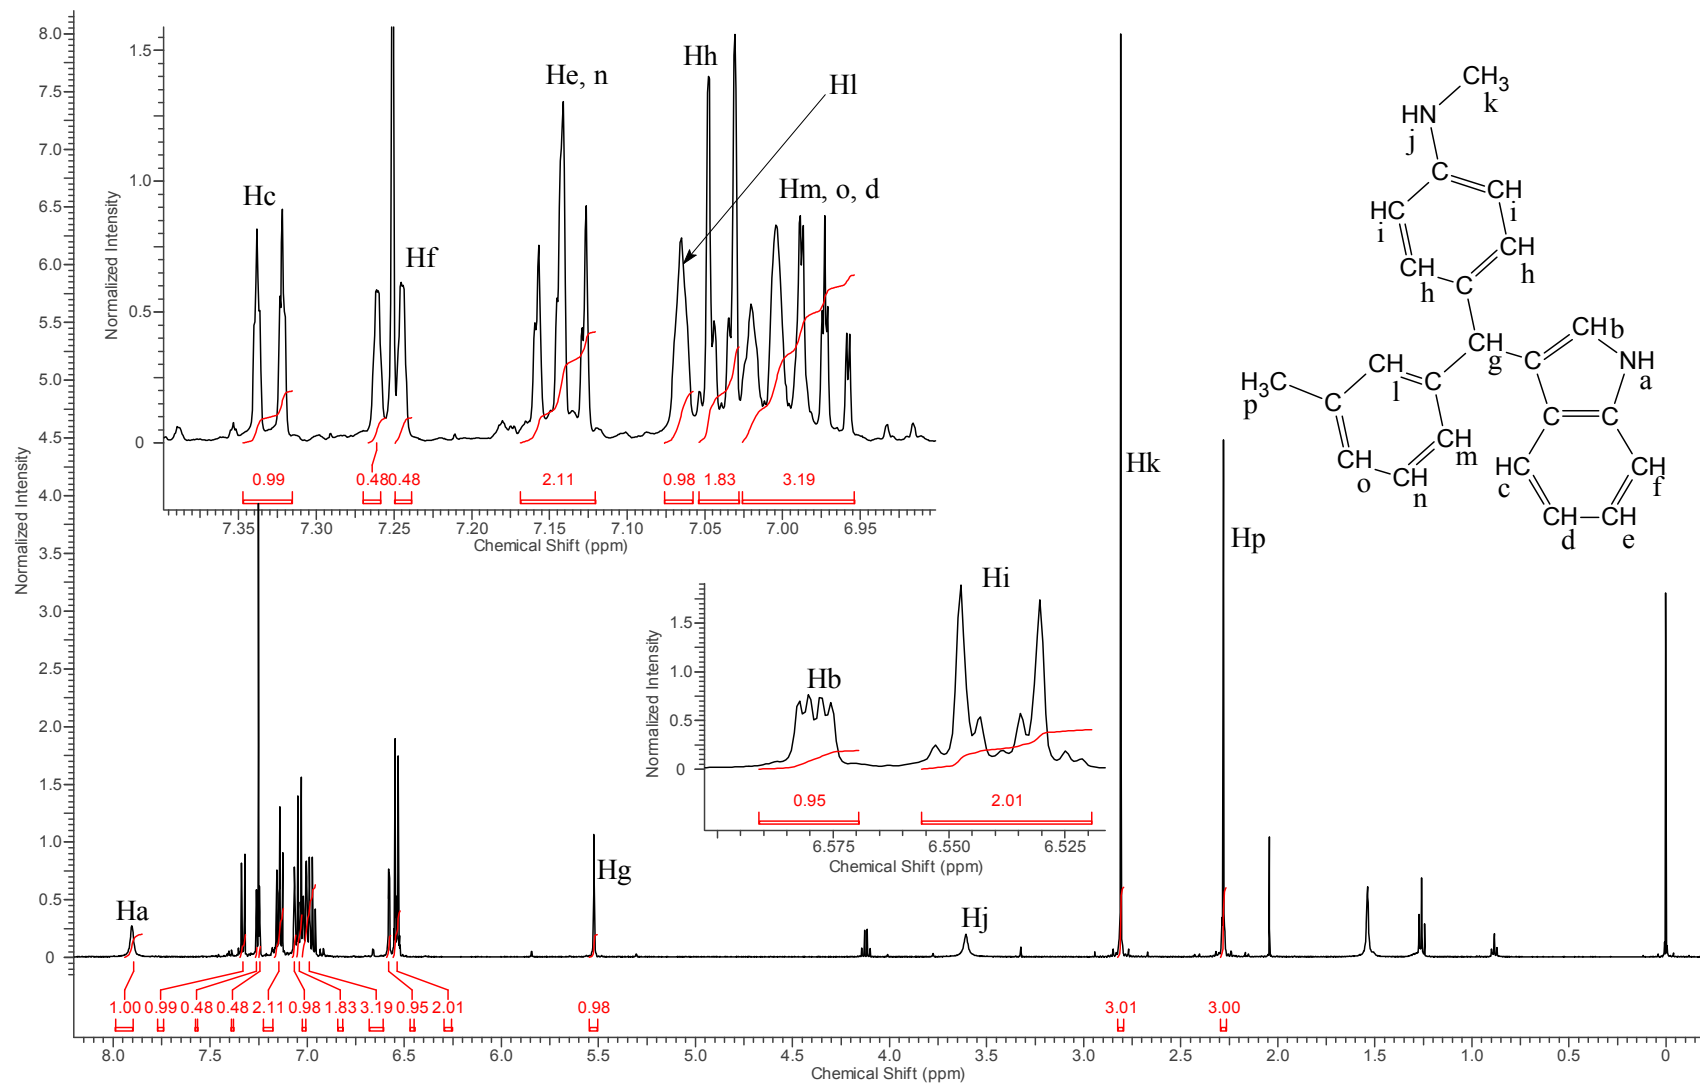

<sup>1</sup>H NMR (500MHz, CDCl<sub>3</sub>) δ = 7.90 (br s, 1 H), 7.33 (d, *J* = 8.2 Hz, 1 H), 7.26 (d, *J* = 7.9 Hz, 1 H), 7.17 - 7.12 (m, 2 H), 7.06 (s, 1 H), 7.04 (d, *J* = 8.5 Hz, 2 H), 7.02 - 6.95 (m, 3 H), 6.58 (dd, *J* = 1.1, 2.3 Hz, 1 H), 6.53 (d, *J* = 8.5 Hz, 2 H), 5.52 (s, 1 H), 3.61 (br s, 1 H), 2.81 (s, 3 H), 2.28 (s, 3 H).

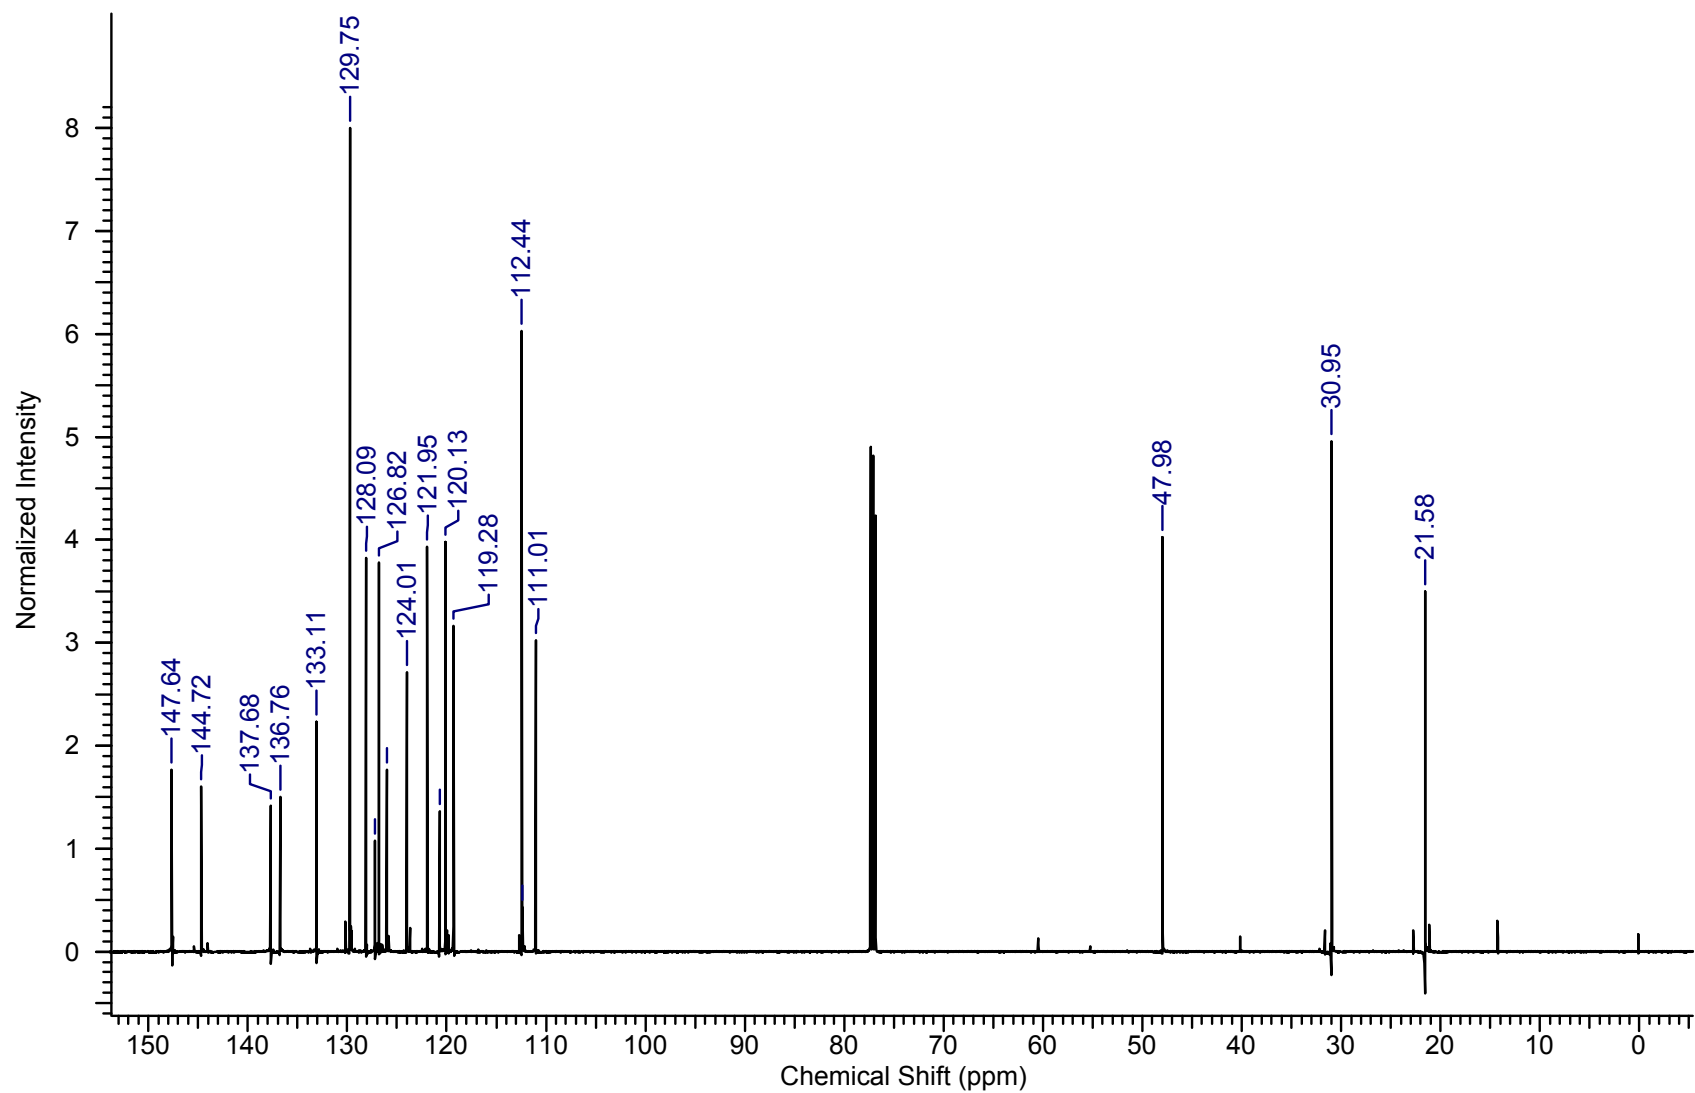

<sup>13</sup>C NMR (126 MHz, CDCl<sub>3</sub>) δ = 147.64, 144.72, 137.68, 136.76, 133.11, 129.75, 128.09, 127.21, 126.82, 126.04, 124.01, 121.95, 120.71, 120.13, 119.28, 112.44, 112.35, 111.01, 47.98, 30.95, 21.58.



| Formula Mass | Daughter number | Parent m/z | Cone Voltage (V) | Daughters | Collision Energy (eV) | Ion Mode |
|--------------|-----------------|------------|------------------|-----------|-----------------------|----------|
| 326.43       | 1               | 327.15     | 44               | 220.88    | 32                    | ES+      |
|              | 2               | 327.15     | 44               | 312.06    | 22                    | ES+      |
|              | 3               | 327.15     | 44               | 210.15    | 22                    | ES+      |
|              | 4               | 327.15     | 44               | 204.03    | 58                    | ES+      |
|              | 5               | 327.15     | 44               | 297.04    | 32                    | ES+      |

1.4 2-nitrobenzaldehyde (1d) + indole (2a) + N-methylaniline (3a): (6d) 4-[1H-indol-3-yl(2-nitrophenyl)methyl]-N-methylaniline

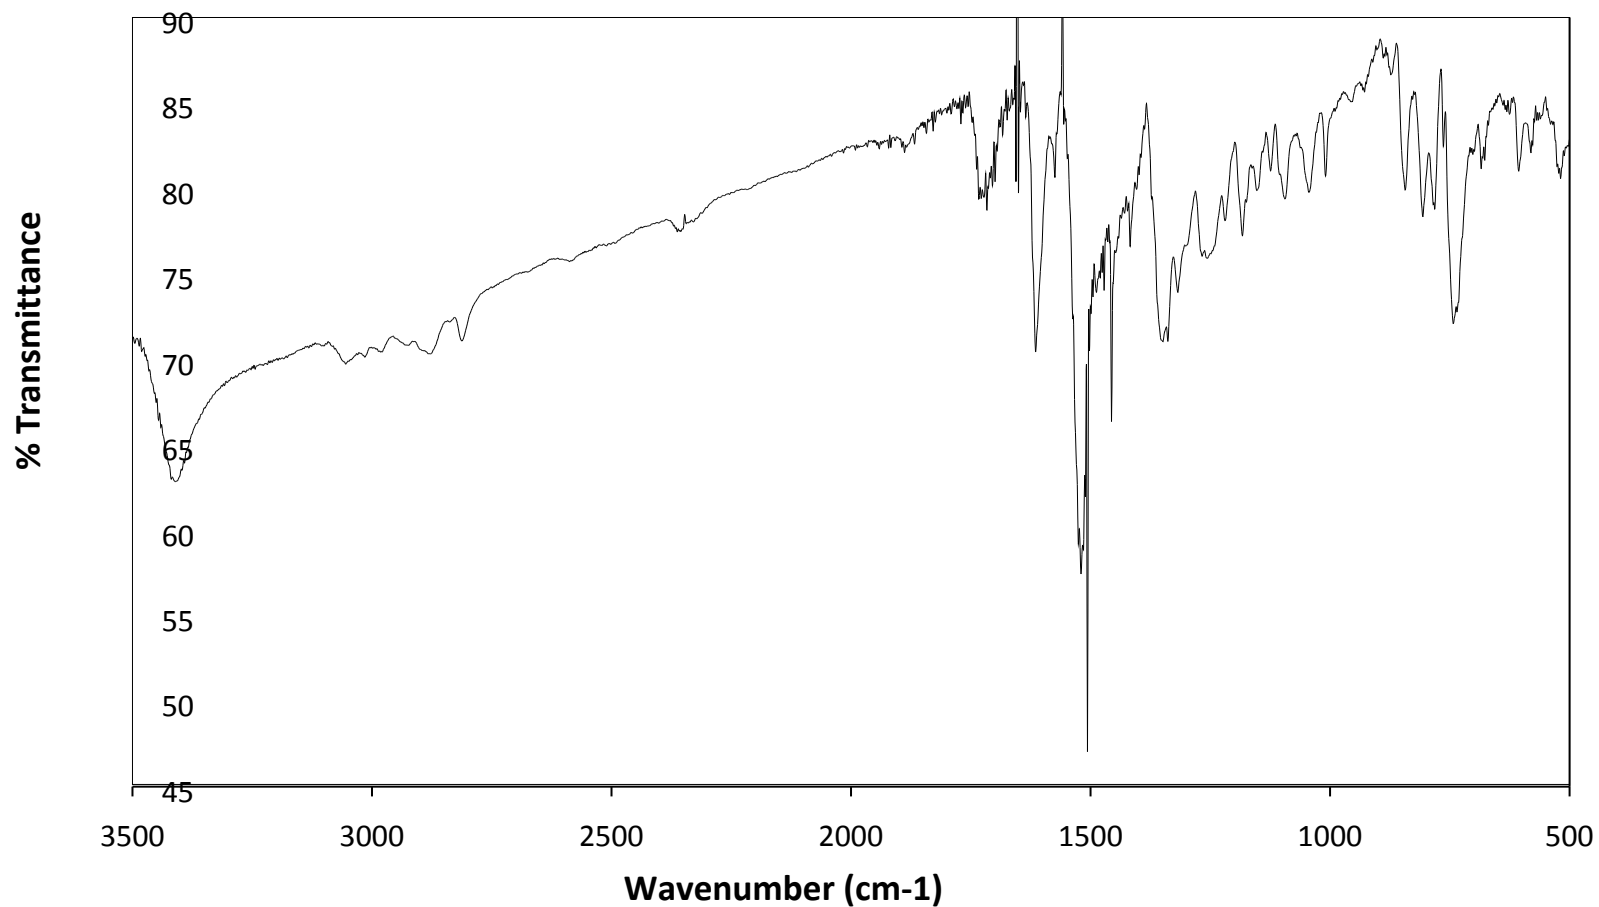

IR (KBr,  $\text{cm}^{-1}$ ): 3412 (br, m), 3055 (w), 3010 (w), 2981 (w), 2924 (w), 2877 (w), 2812 (w), 1716 (w), 1614 (m), 1519 (s), 1506 (s), 1456 (m), 1350 (m), 1338 (m), 1317 (w), 1267 (w), 1255 (w), 1219 (w), 1182 (w), 1153 (w), 1093 (w), 1008 (w), 842 (w), 806 (w), 781 (w), 742 (m), 684 (w).

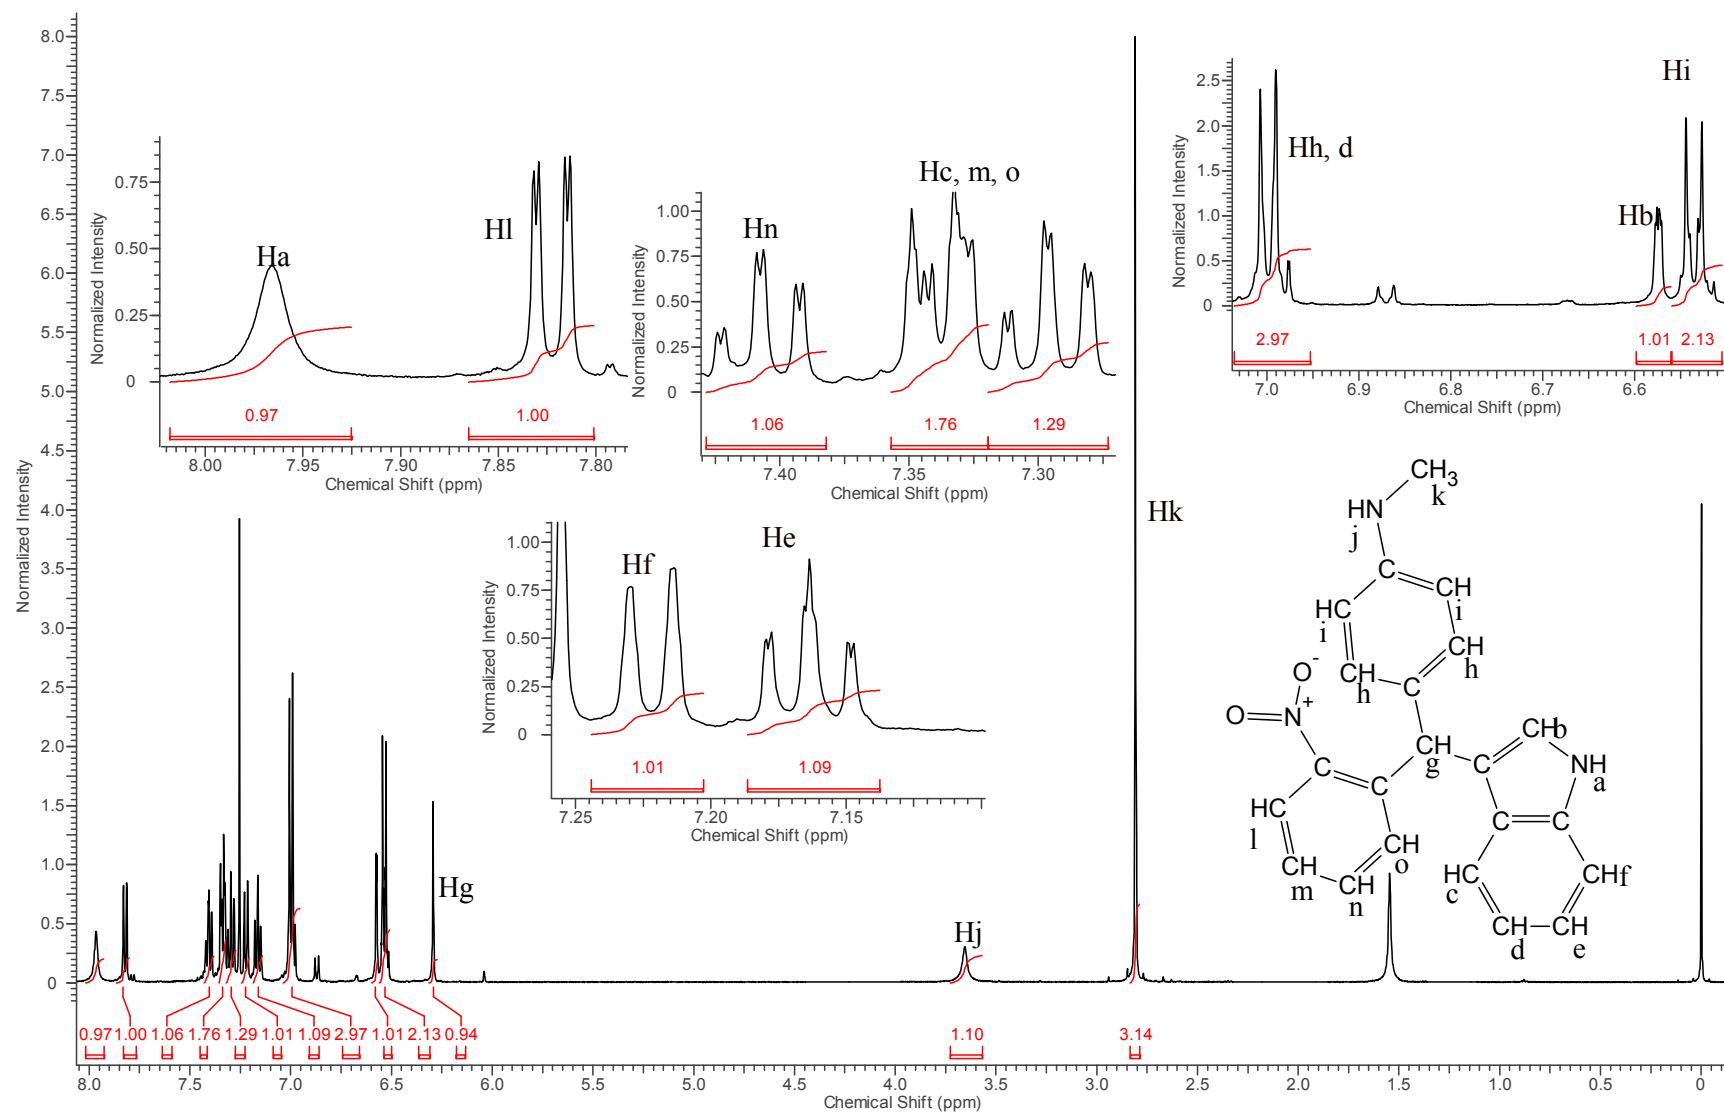

<sup>1</sup>H NMR (500MHz, CDCl<sub>3</sub>) δ = 7.97 (br s, 1 H), 7.82 (dd, J = 1.2, 7.9 Hz, 1 H), 7.41 (td, J = 1.2, 7.6 Hz, 1 H), 7.36 - 7.32 (m, 2 H), 7.30 (td, J = 1.2, 7.6 Hz, 1 H), 7.22 (d, J = 7.9 Hz, 1 H), 7.16 (ddd, J = 1.1, 7.0, 7.9 Hz, 1 H), 7.04 – 6.98 (m, 3H), 6.57 (dd, J = 0.9, 2.1 Hz, 1 H), 6.54 (d, J = 8.5 Hz, 2 H), 6.29 (s, 1 H), 3.66 (br s, 1 H), 2.81 (s, 3 H).



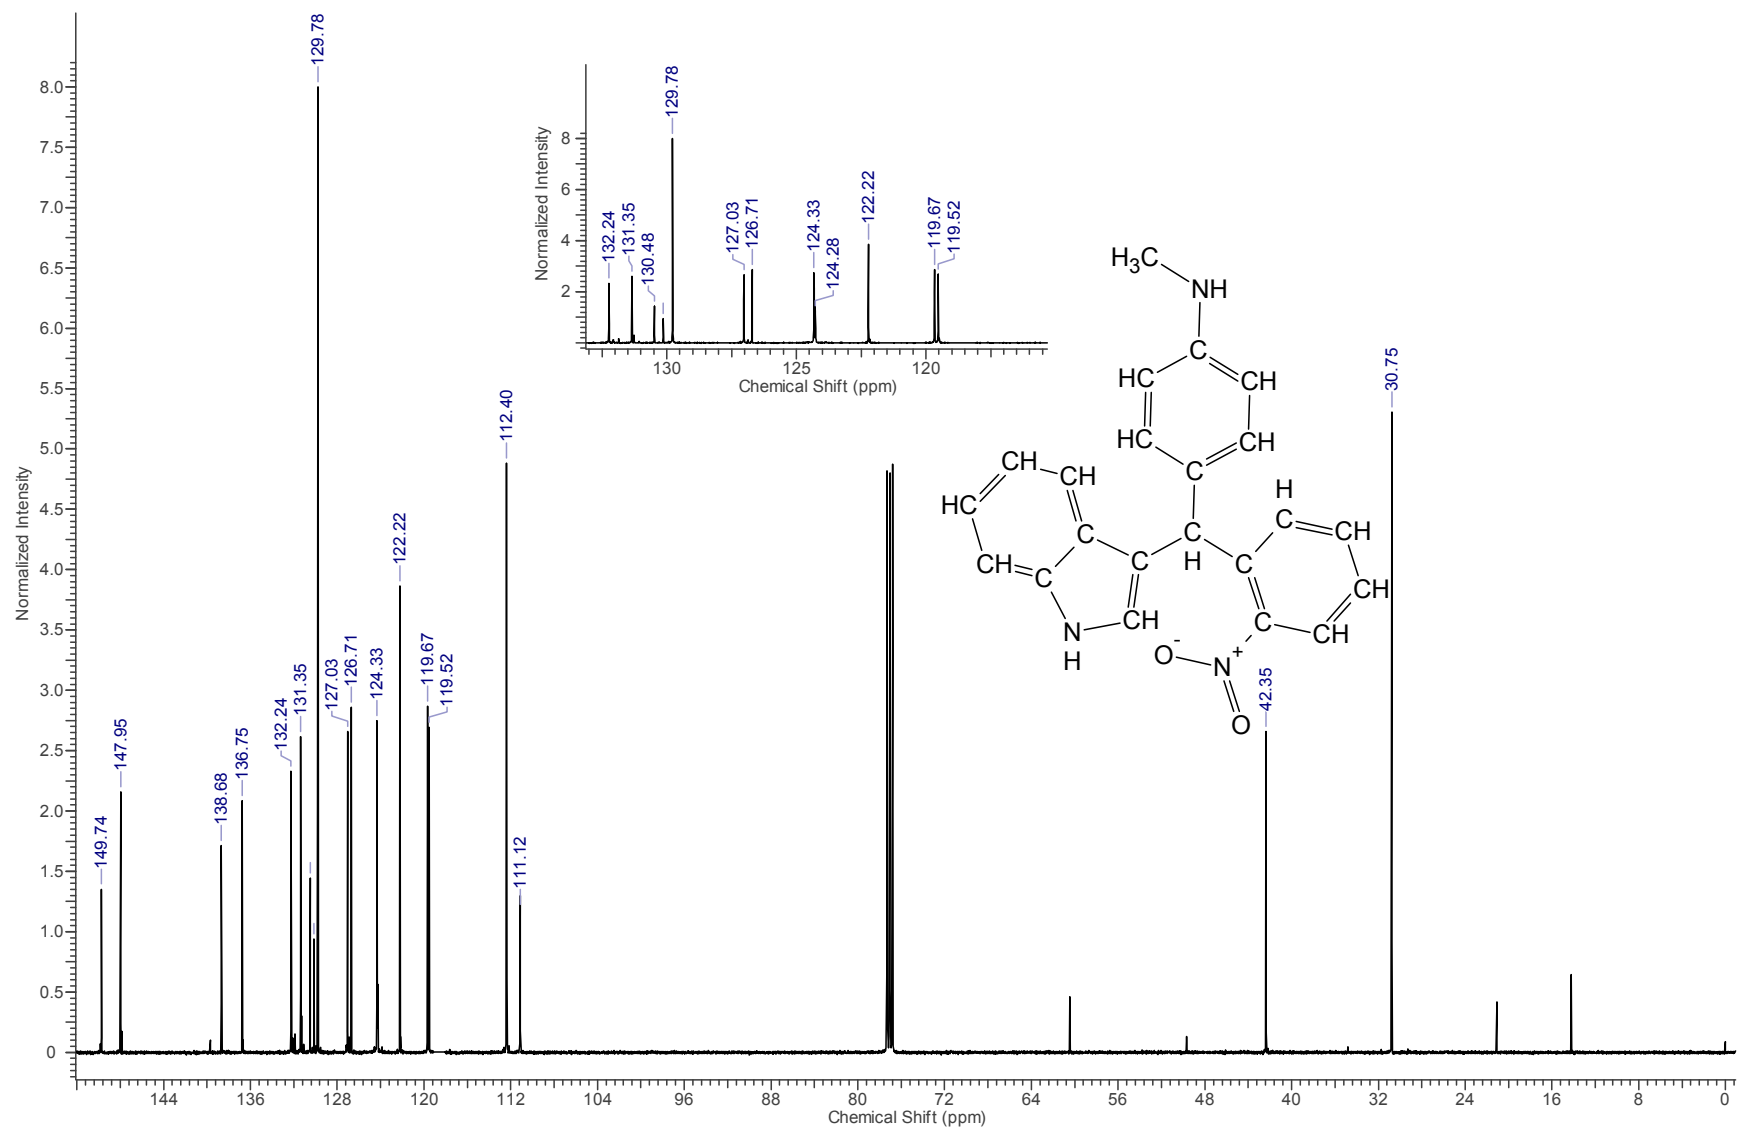

$^{13}\text{C}$  NMR (126 MHz,  $\text{CDCl}_3$ )  $\delta$  = 149.74, 147.95, 138.68, 136.75, 132.24, 131.35, 130.48, 130.14, 129.78, 127.03, 126.71, 124.33, 124.28, 122.22, 119.67, 119.52, 112.40, 111.12, 42.35, 30.75.

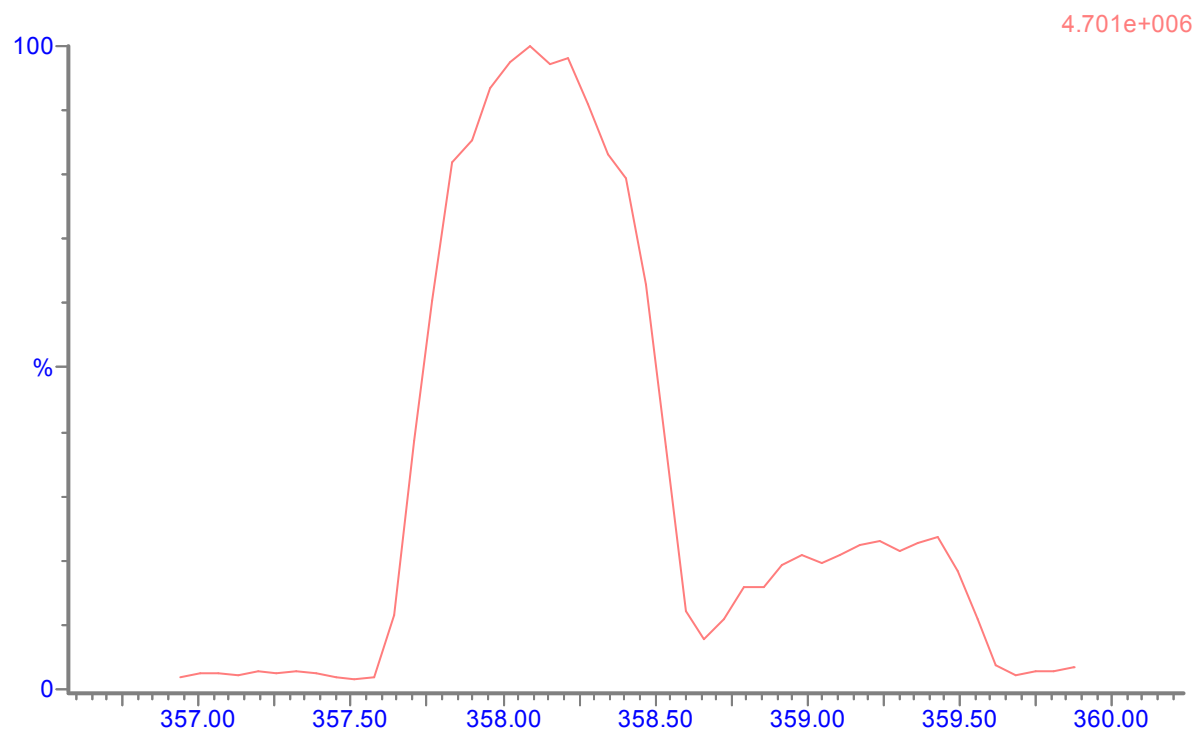

| Formula Mass | Daughter number | Parent m/z | Cone Voltage (V) | Daughters | Collision Energy (eV) | Ion Mode |
|--------------|-----------------|------------|------------------|-----------|-----------------------|----------|
| 357.42       | 1               | 358.07     | 36               | 324.07    | 26                    | ES+      |
|              | 2               | 358.07     | 36               | 122.01    | 28                    | ES+      |
|              | 3               | 358.07     | 36               | 205.12    | 22                    | ES+      |
|              | 4               | 358.07     | 36               | 241.09    | 20                    | ES+      |

**1.5 3-nitrobenzaldehyde (1e) + indole (2a) + N-methylaniline (3a): (6e) 4-[1*H*-indol-3-yl(3-nitrophenyl)methyl]-*N*-methylaniline**

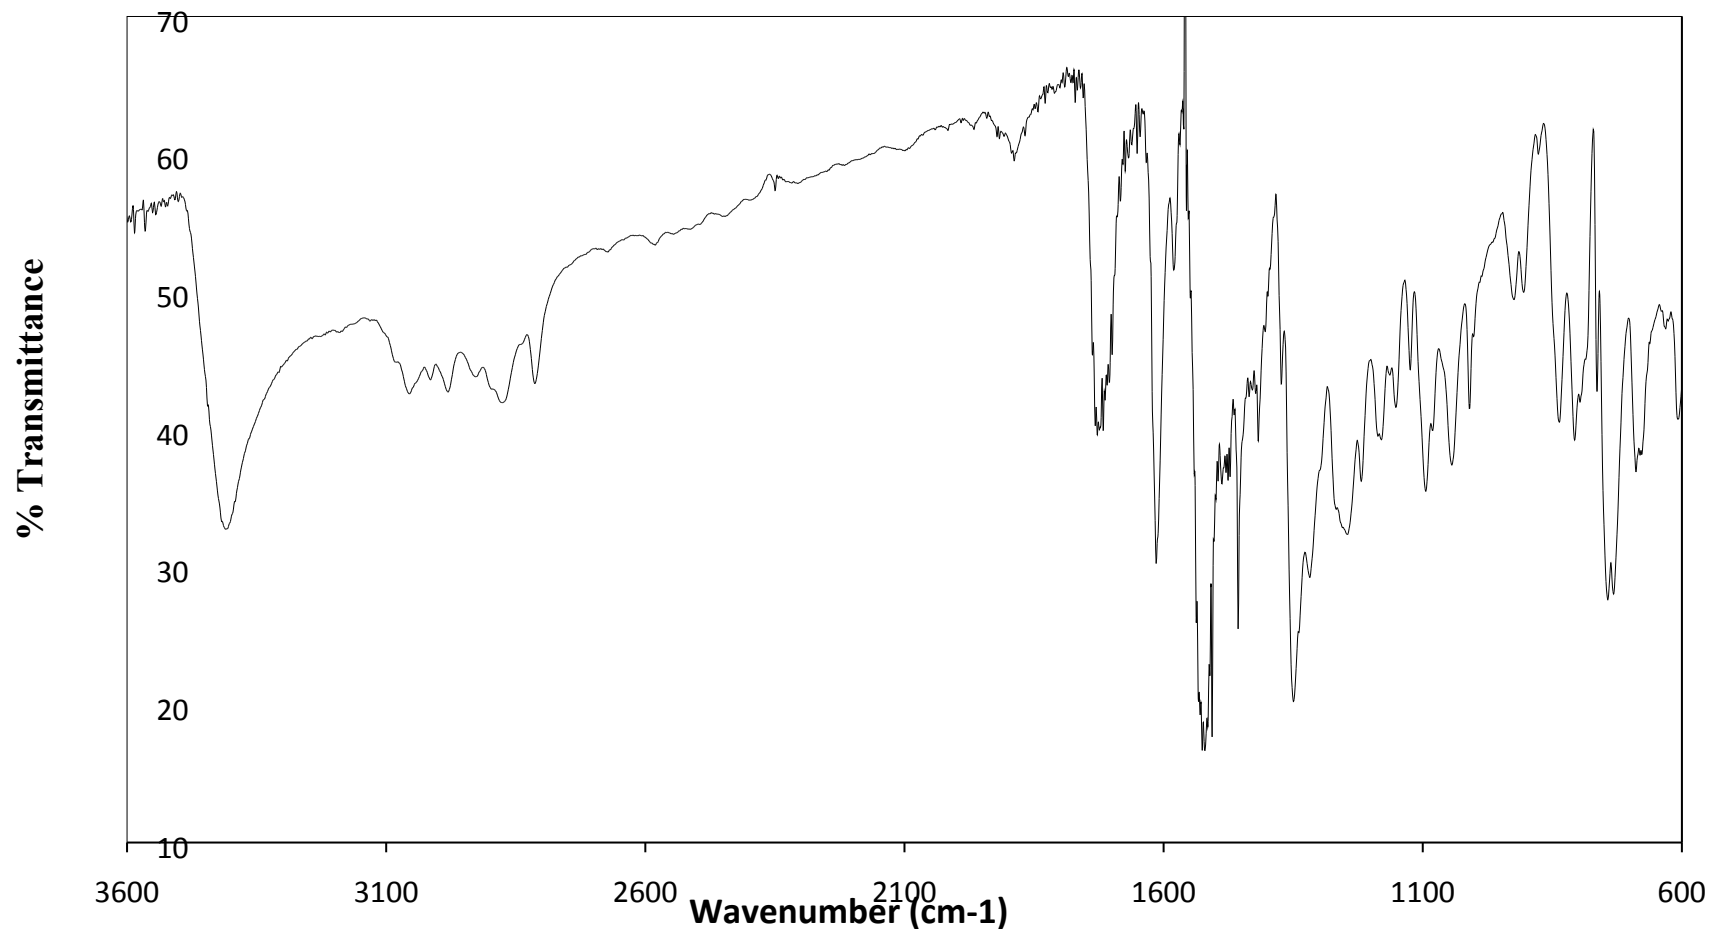

IR (KBr,  $\text{cm}^{-1}$ ): 3410 (br, m), 3055 (w), 3012 (w), 2980 (w), 2927 (w), 2877 (w), 2816 (w), 1728 (m), 1614 (m), 1525 (s), 1506 (s), 1456 (s), 1348 (s), 1332 (m), 1246 (m), 1217 (w), 1178 (w), 1151 (w), 1093 (w), 1043 (w), 1008 (w), 923 (w), 904 (w), 837 (m), 806 (m), 742 (m), 731 (m), 688 (w).

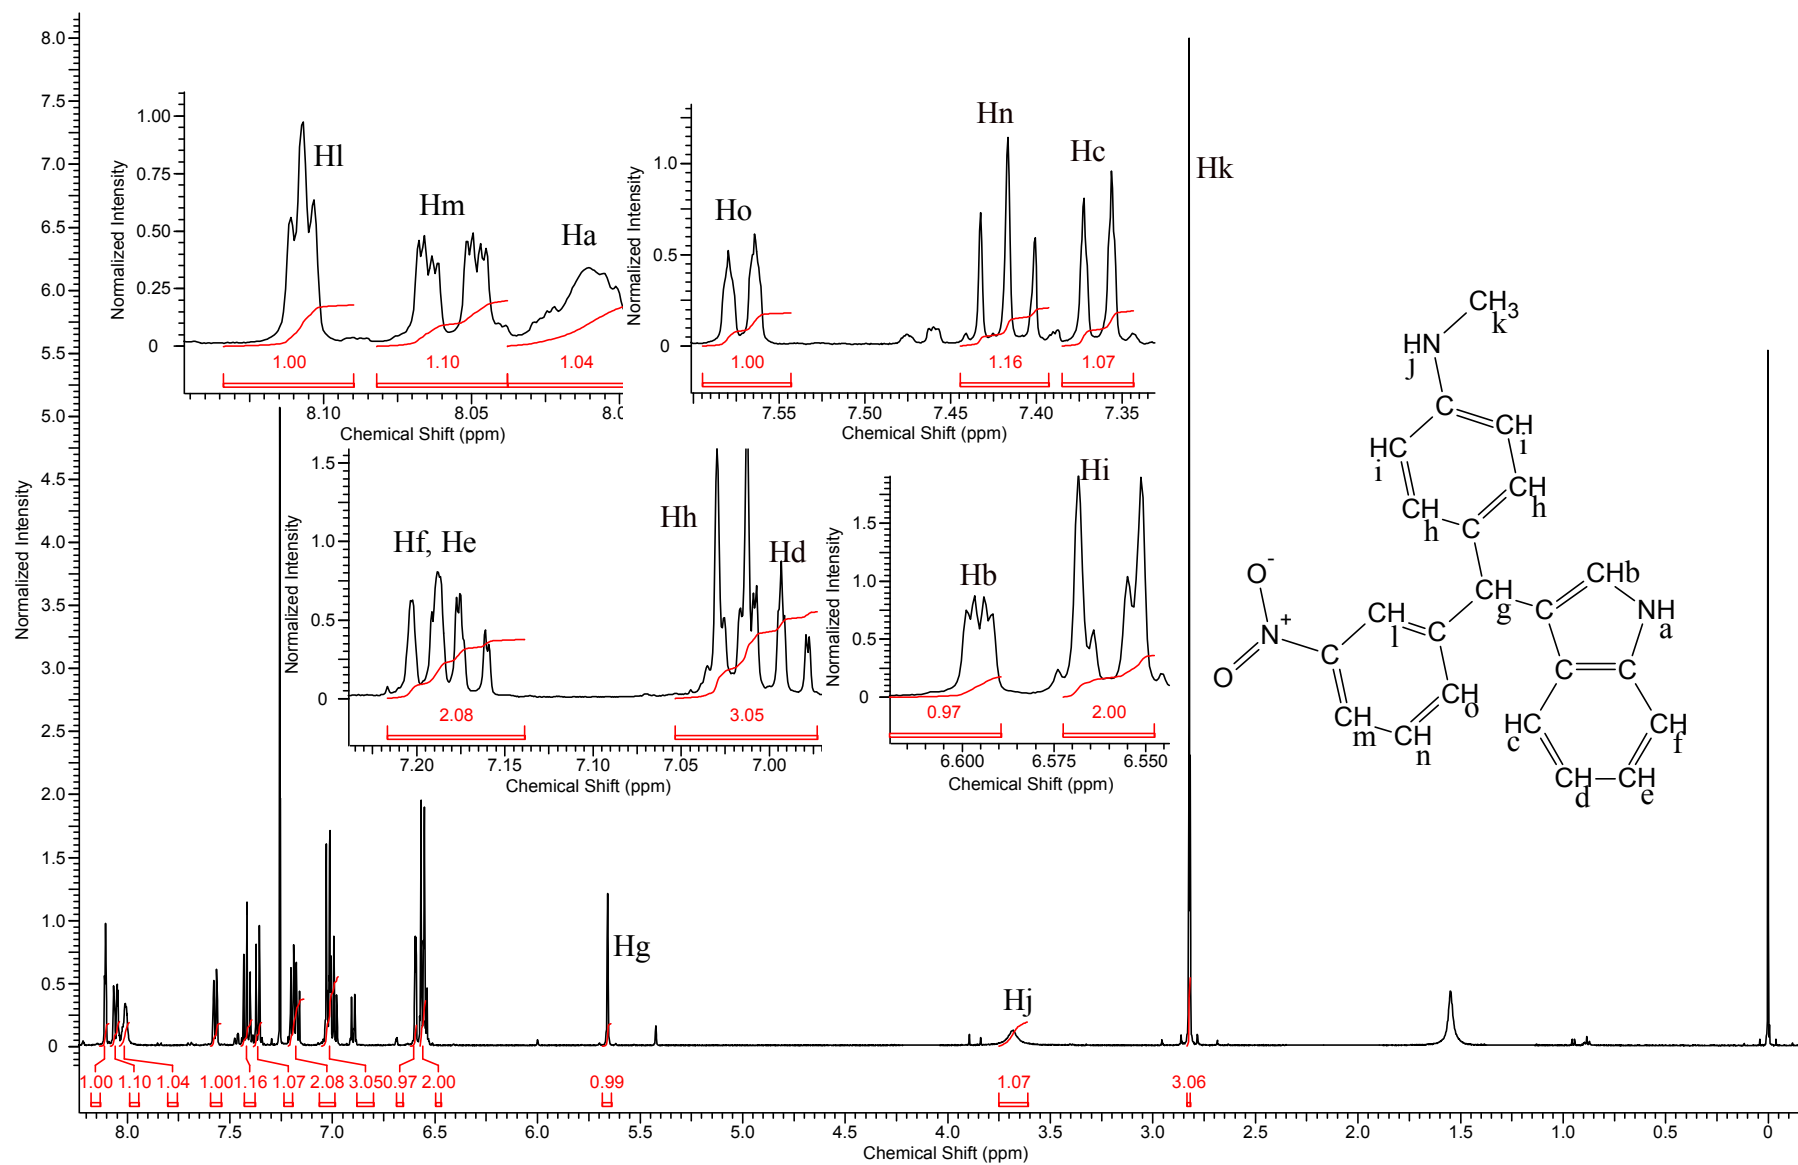

<sup>1</sup>H NMR (500MHz, CDCl<sub>3</sub>)  $\delta$  = 8.11 (t,  $J$  = 2.1 Hz, 1 H), 8.05 (ddd,  $J$  = 0.9, 2.1, 8.3 Hz, 1 H), 8.02 (br s, 1 H), 7.57 (d,  $J$  = 7.6 Hz, 1 H), 7.42 (t,  $J$  = 7.9 Hz, 1 H), 7.36 (d,  $J$  = 8.1 Hz, 1 H), 7.21 - 7.15 (m, 2 H), 7.04 - 6.97 (m, 3 H), 6.60 (dd,  $J$  = 1.2, 2.4 Hz, 1 H), 6.56 (d,  $J$  = 8.5 Hz, 2 H), 5.66 (s, 1 H), 3.68 (br, s, 1 H), 2.82 (s, 3 H).

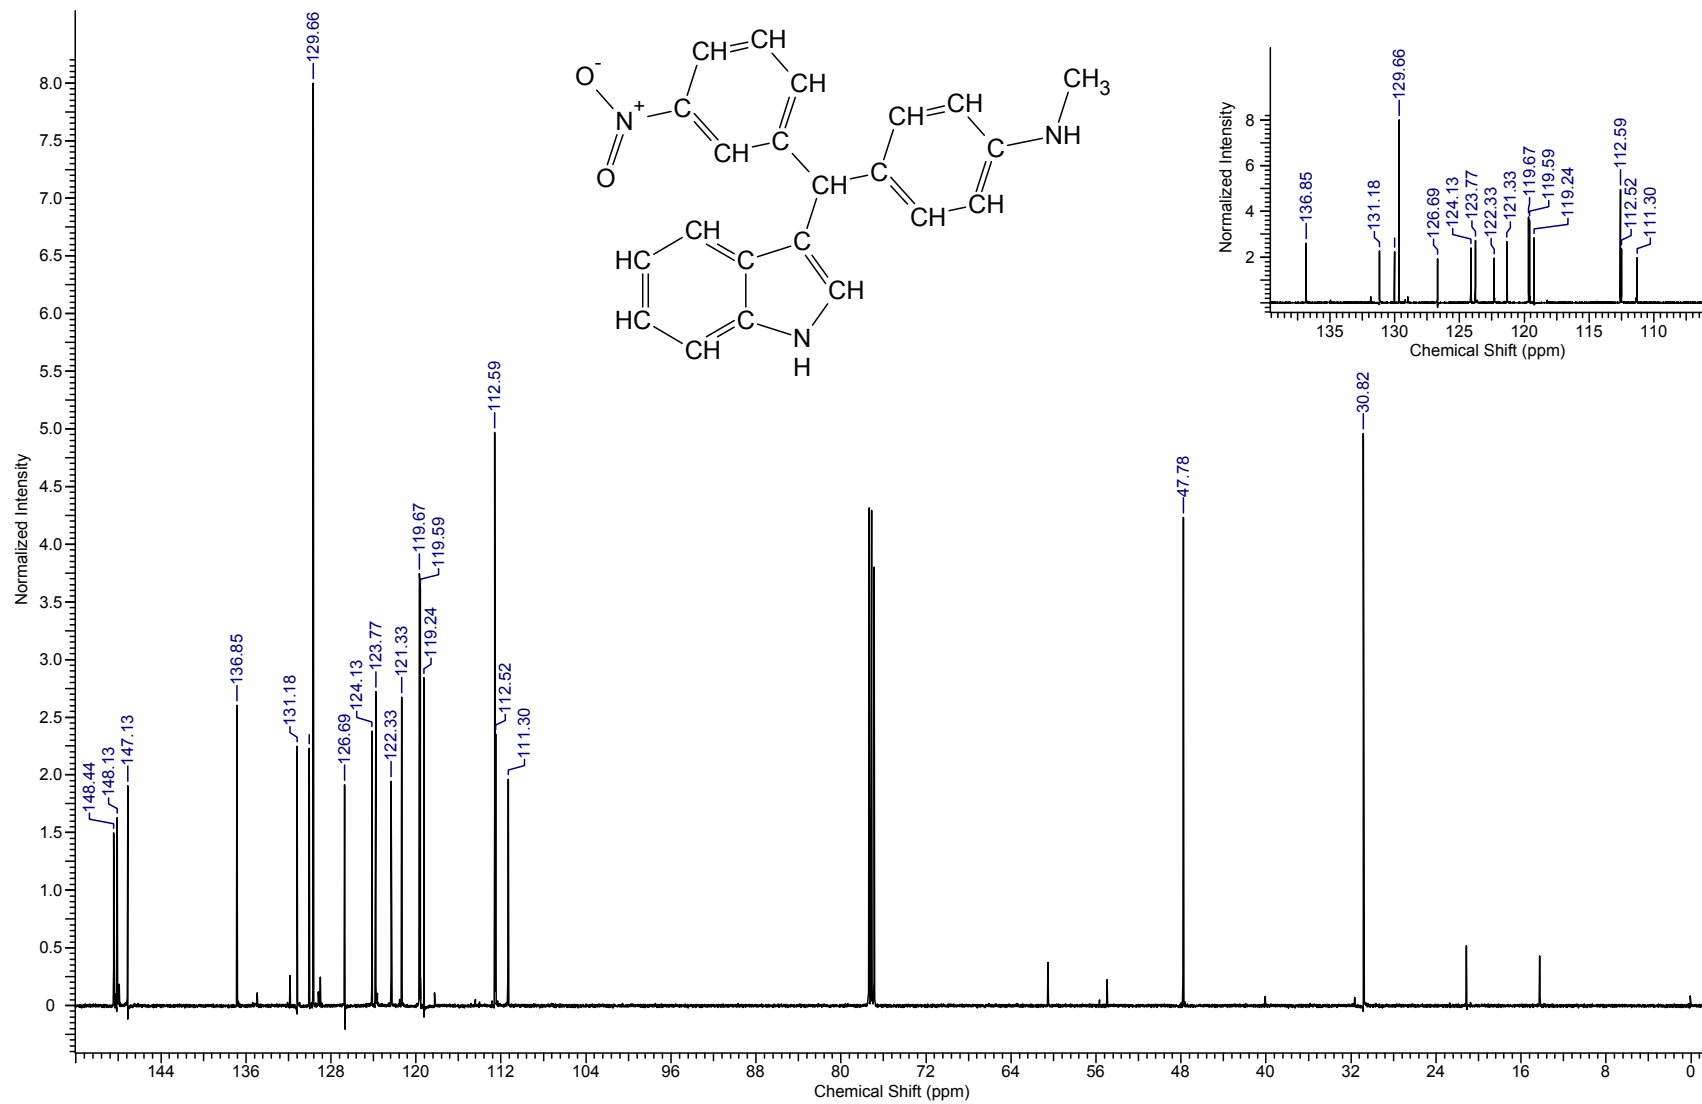

<sup>13</sup>C NMR (126 MHz, CDCl<sub>3</sub>) δ = 148.44, 148.13, 147.13, 136.85, 131.18, 130.02, 129.66, 126.69, 124.13, 123.77, 122.33, 121.33, 119.67, 119.59, 119.24, 112.59, 112.52, 111.30, 47.78, 30.82.

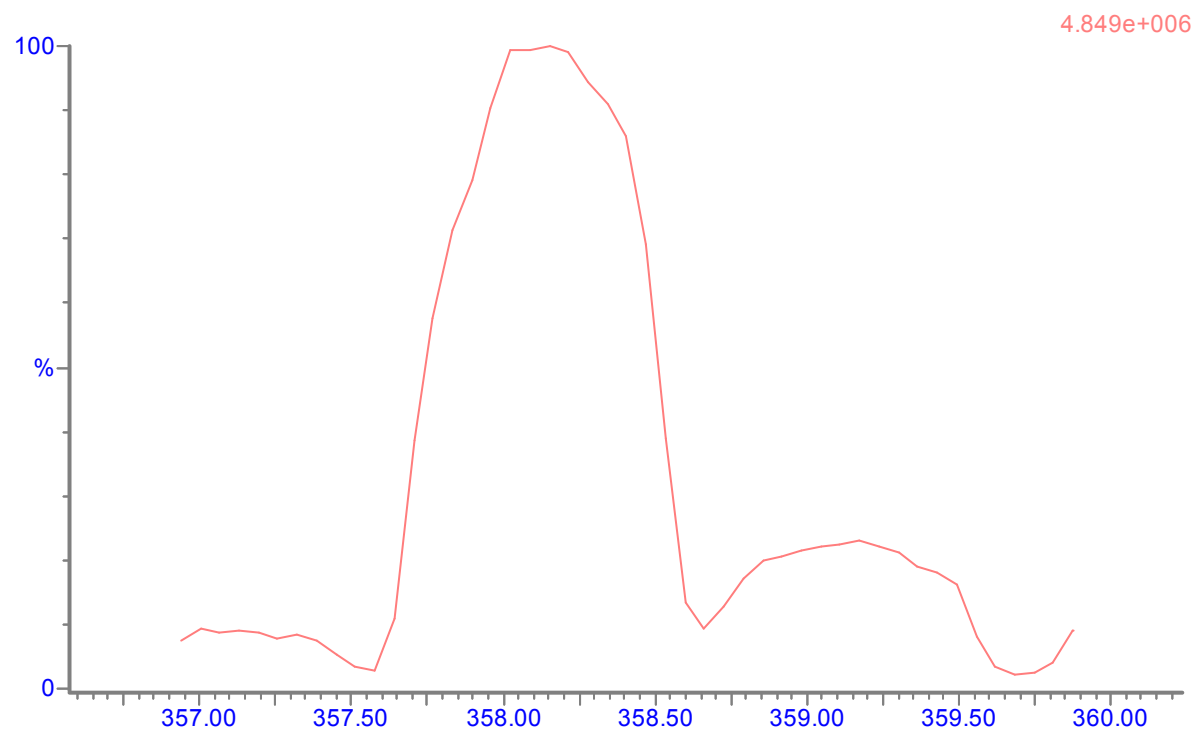

| Formula/Mass | Daughter number | Parent m/z | Cone Voltage | Daughters | Collision Energy | Ion Mode |
|--------------|-----------------|------------|--------------|-----------|------------------|----------|
| 357.42       | 1               | 358.13     | 38           | 241.09    | 20               | ES+      |
|              | 2               | 358.13     | 38           | 221.12    | 34               | ES+      |
|              | 3               | 358.13     | 38           | 251.10    | 20               | ES+      |
|              | 4               | 358.13     | 38           | 204.20    | 52               | ES+      |

**1.6 4-nitrobenzaldehyde (1f) + indole (2a) + N-methylaniline (3a): (6f) 4-[1*H*-indol-3-yl(4-nitrophenyl)methyl]-*N*-methylaniline**

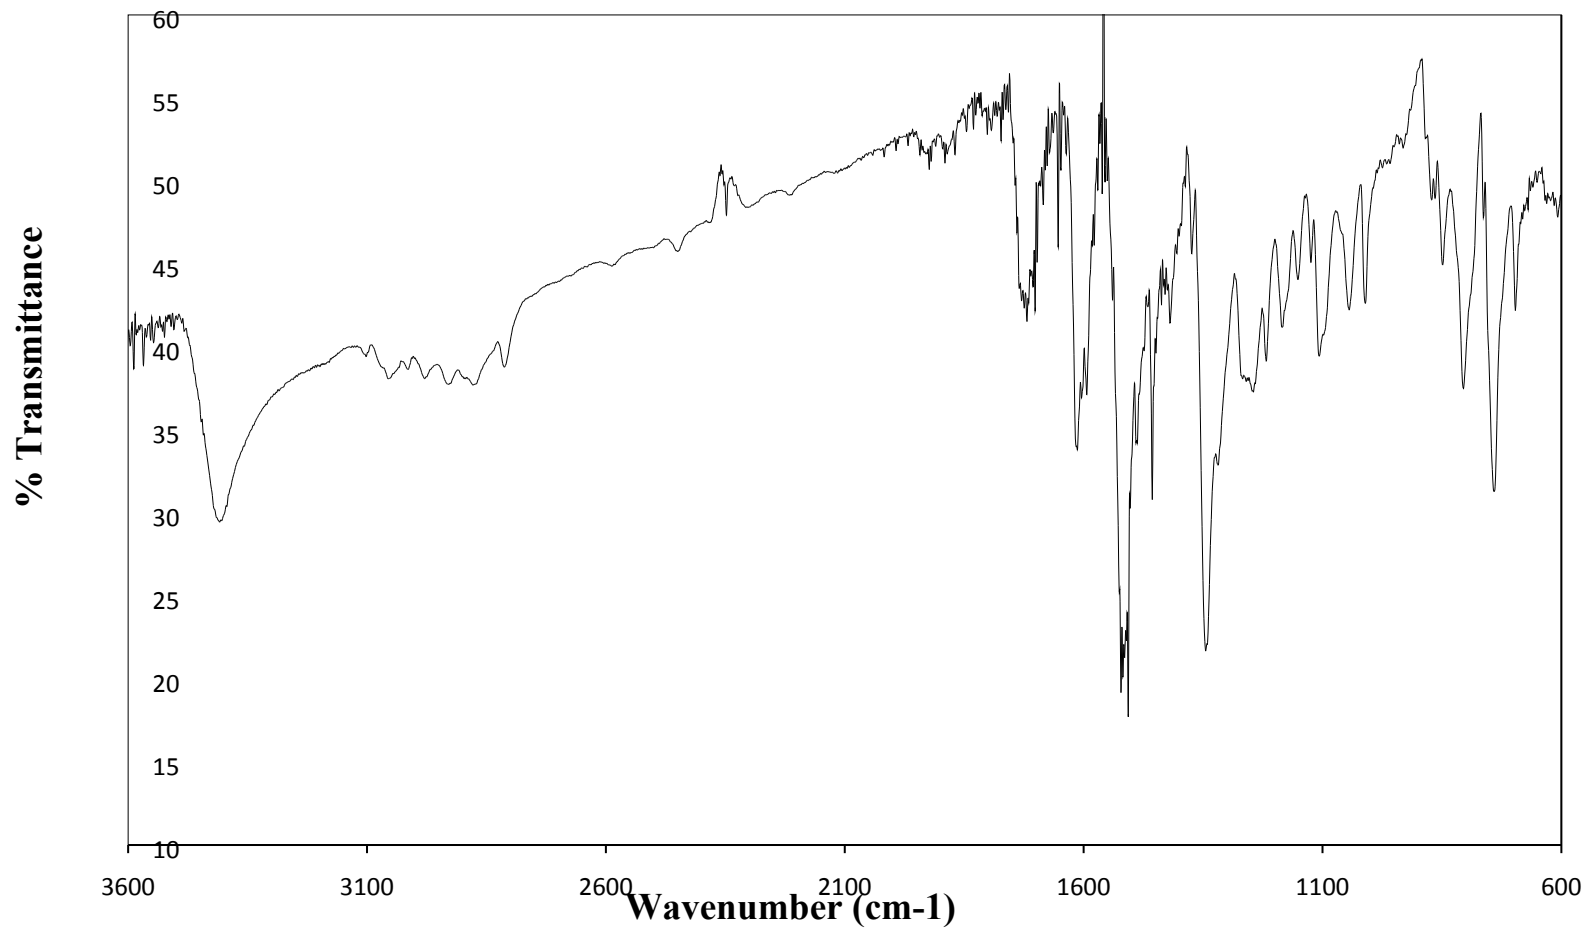

IR (KBr, cm<sup>-1</sup>): 3408 (br, m), 3101 (w), 3053 (w), 3014 (w), 2978 (w), 2931 (w), 2870 (w), 2816 (w), 1718 (m), 1612 (m), 1521 (s), 1506 (s), 1456 (m), 1344 (s), 1319 (m), 1244 (w), 1219 (w), 1184 (w), 1107 (w), 1045 (w), 1010 (w), 848 (w), 804 (m), 740 (m), 696 (w).

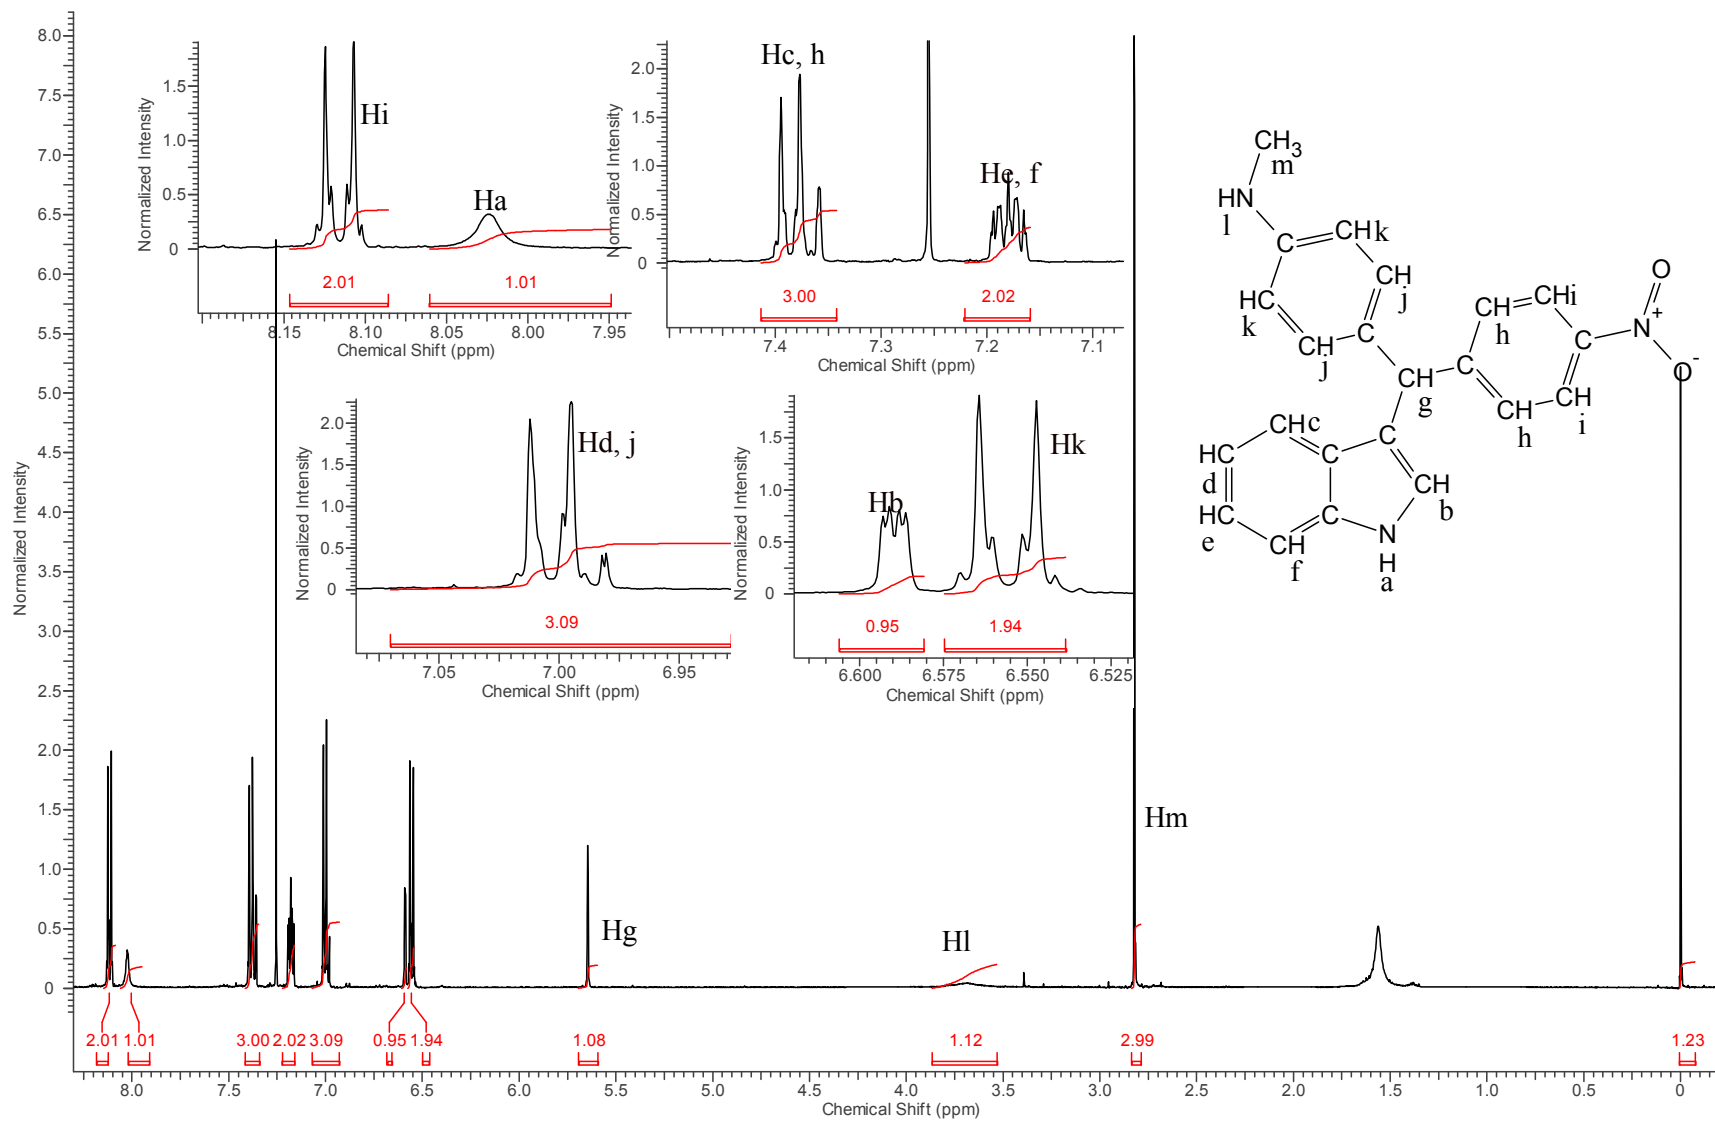

<sup>1</sup>H NMR (500MHz, CDCl<sub>3</sub>)  $\delta$  = 8.11(d,  $J$  = 8.8 Hz, 2 H), 8.02 (br s, 1 H), 7.43 - 7.33 (m, 3 H), 7.23 - 7.14 (m, 2 H), 7.04 - 6.95 (m, 3 H), 6.59 (dd,  $J$  = 0.9, 2.4 Hz, 1 H), 6.55 (d,  $J$  = 8.5 Hz, 2 H), 5.64 (s, 1 H), 3.67 (s, 1H), 2.82 (s, 3 H).



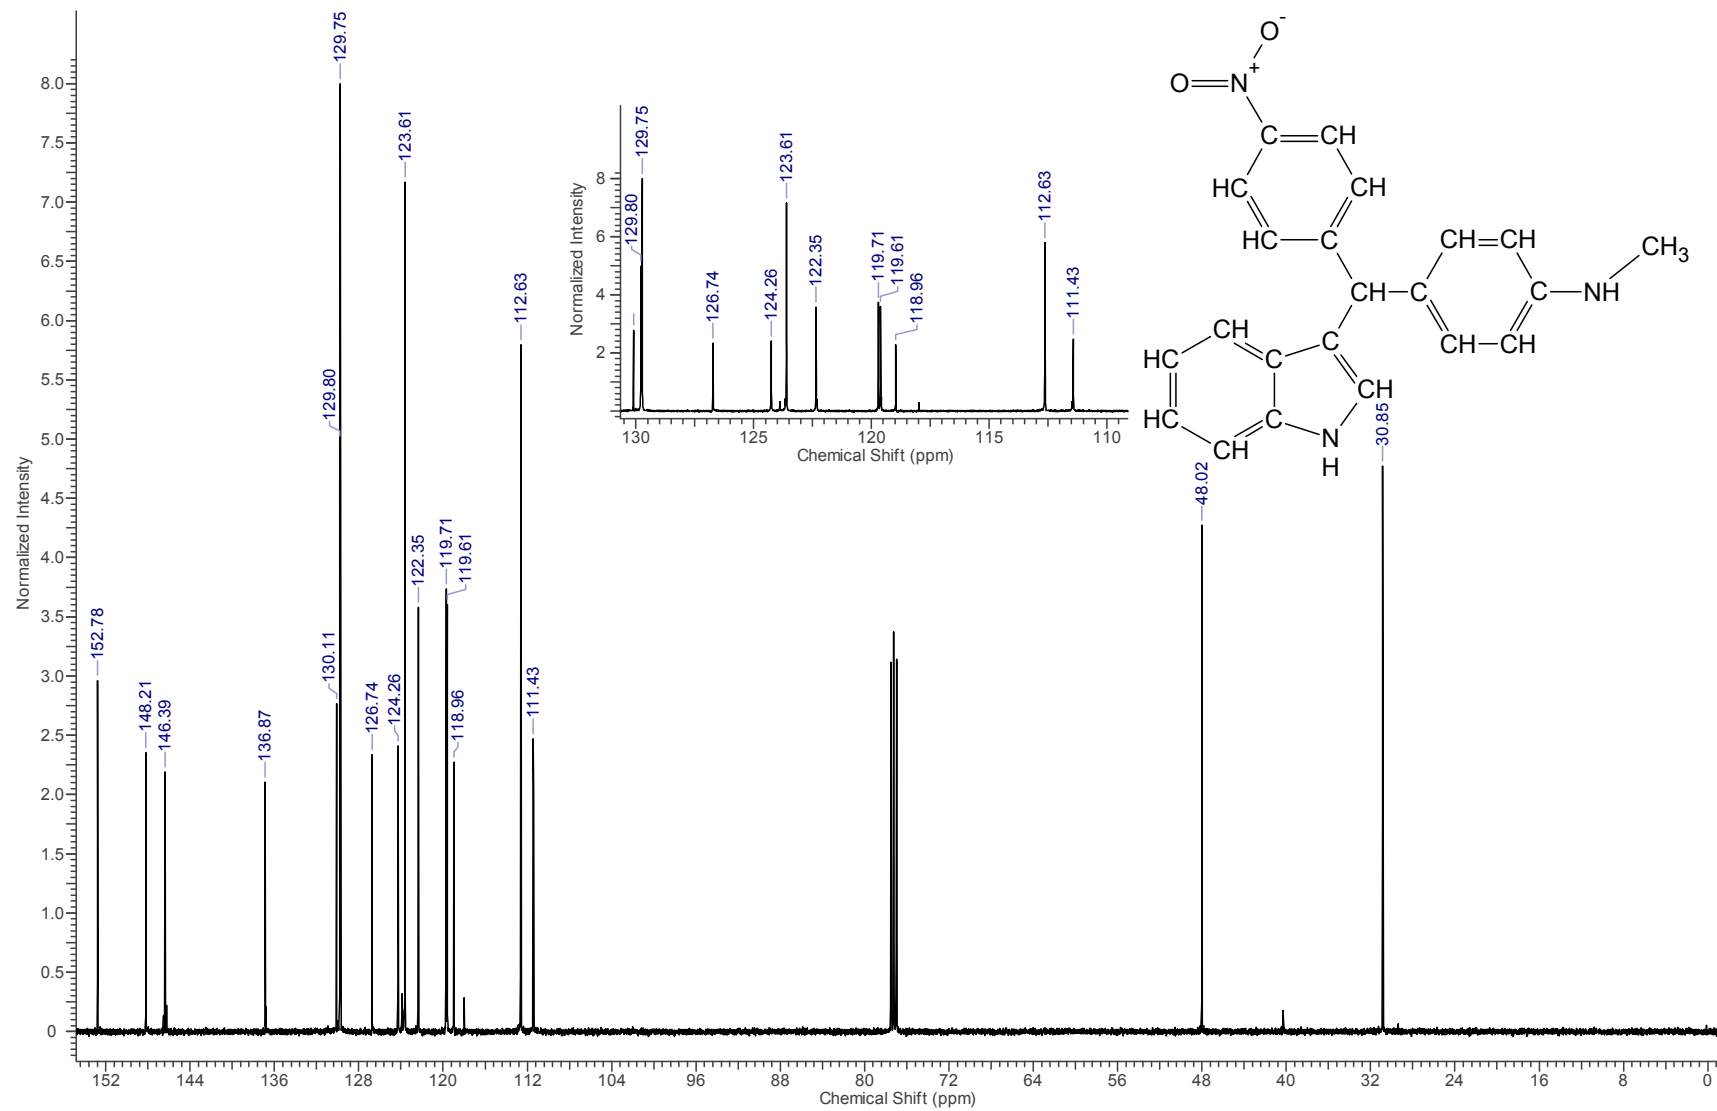

<sup>13</sup>C NMR (126 MHz, CDCl<sub>3</sub>) δ = 152.78, 148.21, 146.39, 136.87, 130.11, 129.80, 129.75, 126.74, 124.26, 123.61, 122.35, 119.71, 119.61, 118.96, 112.63, 111.43, 48.02, 30.85.

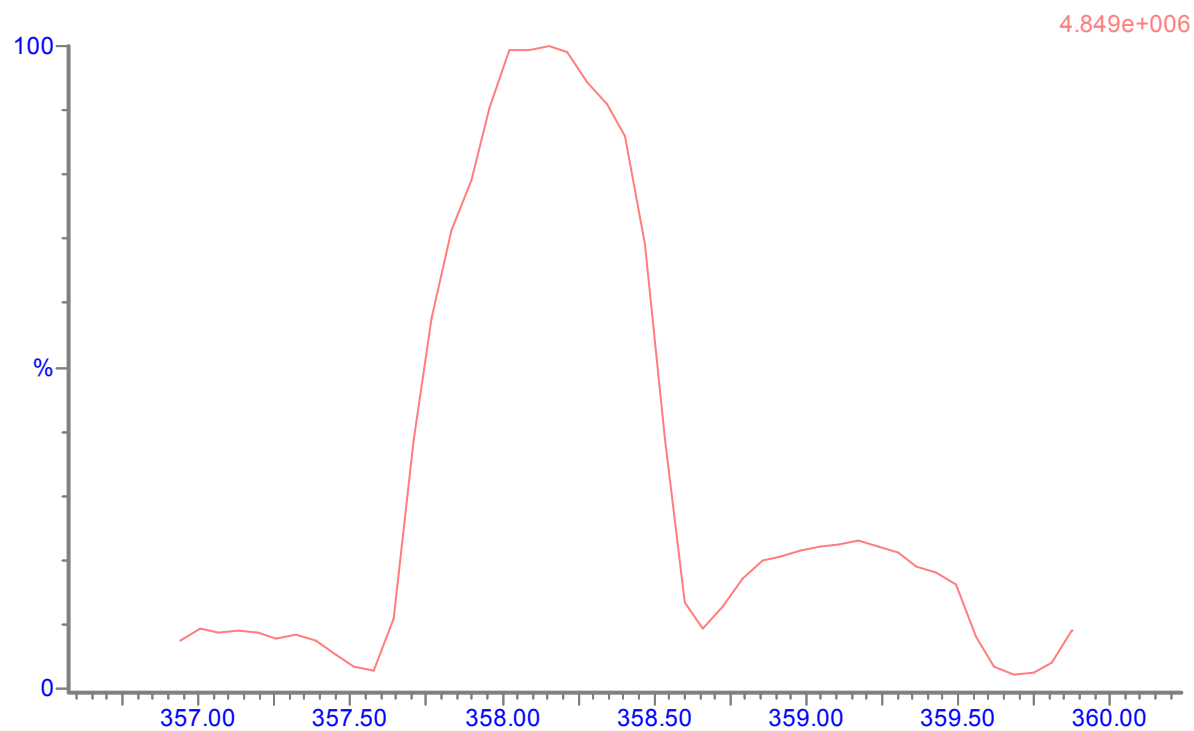

| Formula Mass | Daughter number | Parent m/z | Cone Voltage (V) | Daughters | Collision Energy (eV) | Ion Mode |
|--------------|-----------------|------------|------------------|-----------|-----------------------|----------|
| 357.42       | 1               | 358.13     | 38               | 241.09    | 20                    | ES+      |
|              | 2               | 358.13     | 38               | 221.12    | 34                    | ES+      |
|              | 3               | 358.13     | 38               | 251.10    | 20                    | ES+      |
|              | 4               | 358.13     | 38               | 204.20    | 52                    | ES+      |

**1.7 2-methoxybenzaldehyde (1g) + indole (2a) + N-methylaniline (3a): (6g) 4-[1H-indol-3-yl(2-methoxyphenyl)methyl]-N-methylaniline**

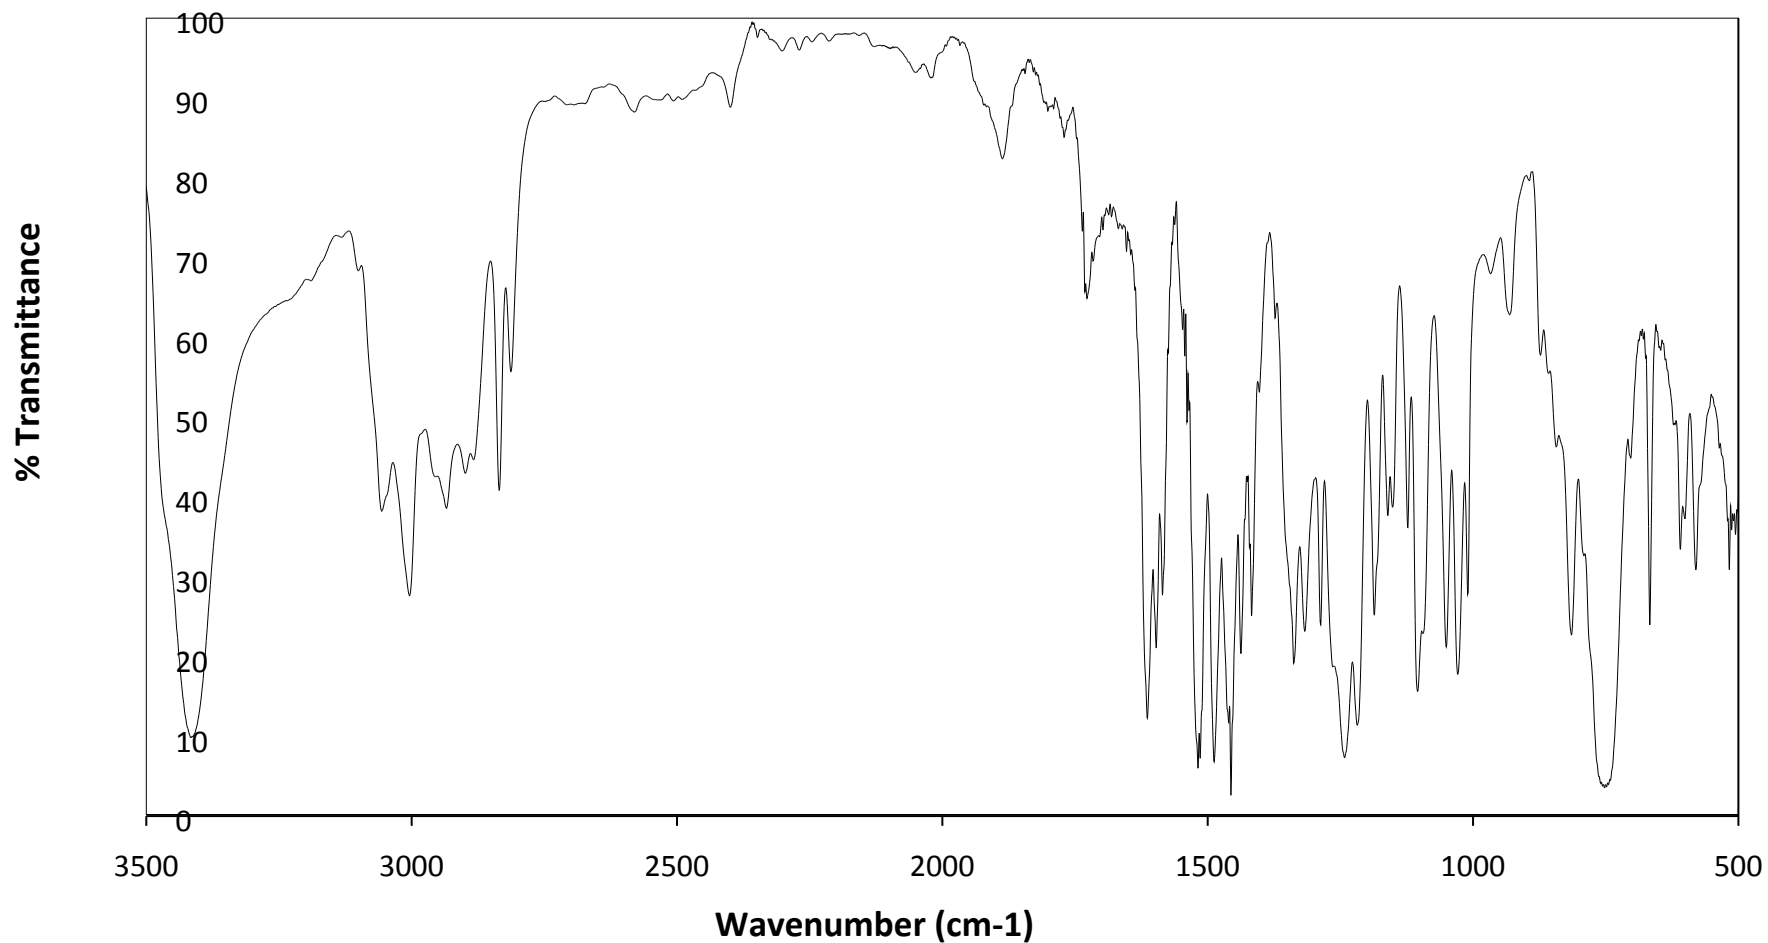

IR (KBr,  $\text{cm}^{-1}$ ): 3412 (s), 3059 (m), 3003 (m), 2933 (w), 2897 (w), 2835 (w), 2812 (w), 1726 (w), 1614 (s), 1597 (s), 1517 (s), 1487 (s), 1456 (s), 1436 (m), 1338 (m), 1317 (m), 1269 (m), 1242 (s), 1217 (m), 1186 (m), 1105 (m), 1051 (m), 1022 (m), 931 (w), 815 (m), 748 (s).

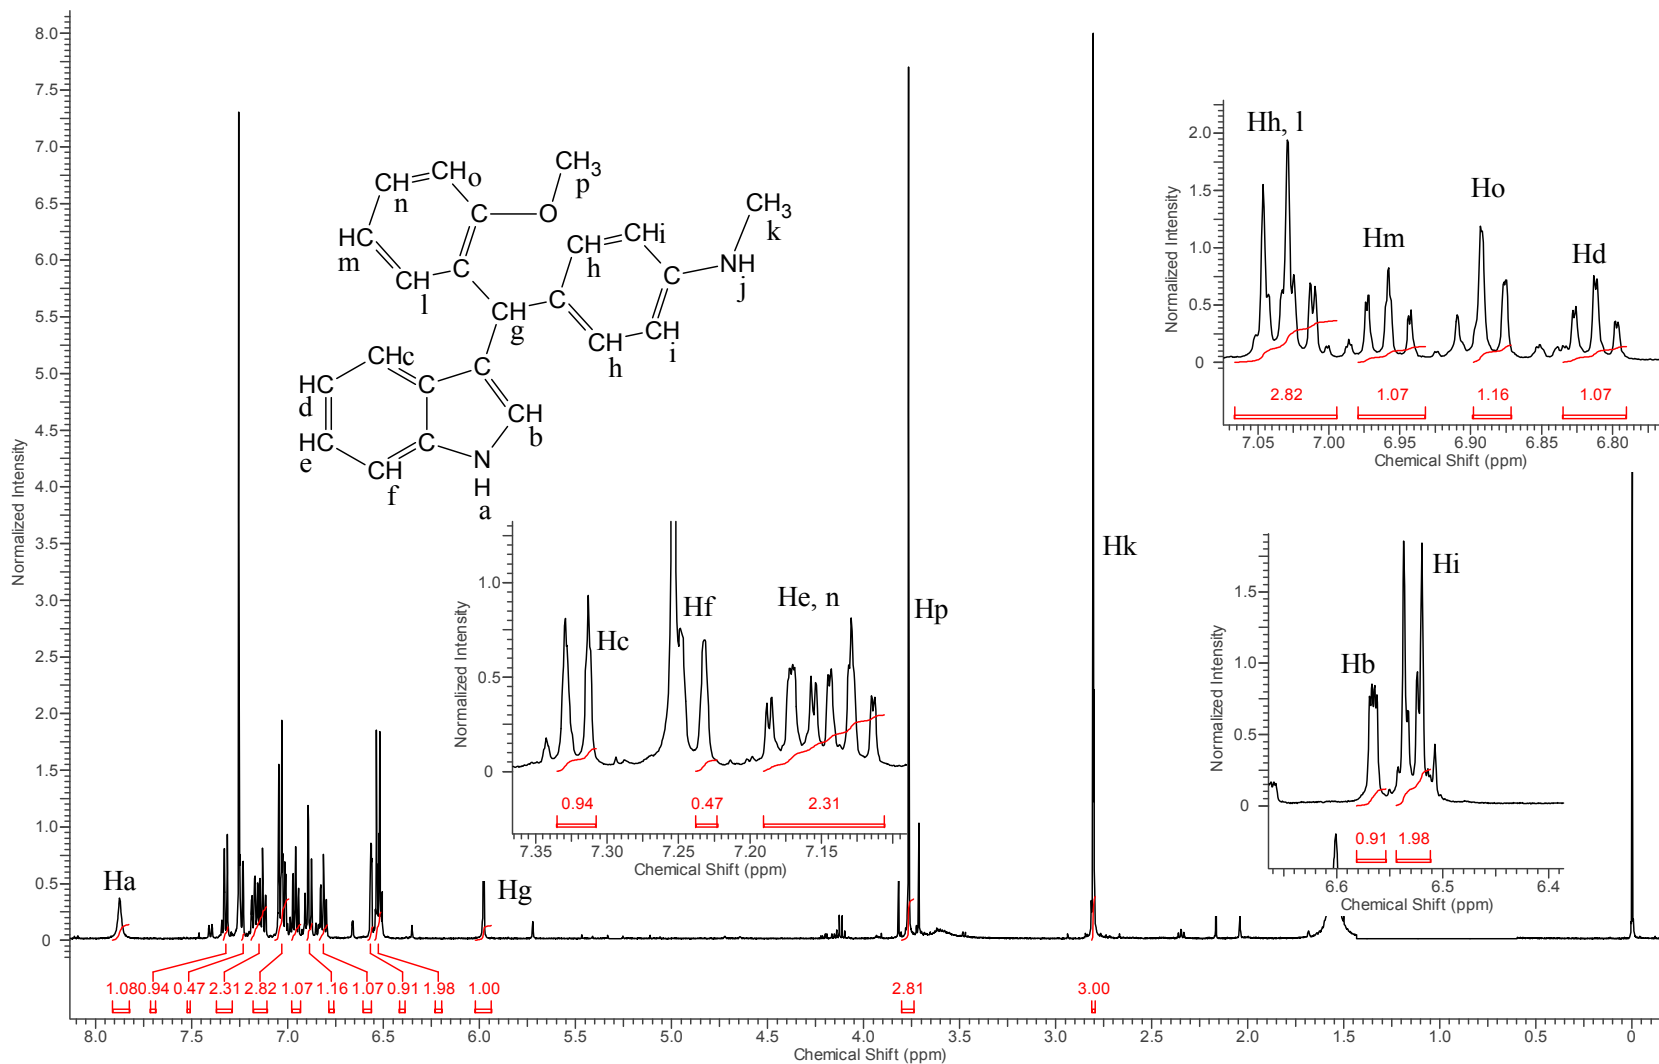

<sup>1</sup>H NMR (500MHz, CDCl<sub>3</sub>) δ = 7.87 (br s, 1 H), 7.32 (d, *J* = 8.2 Hz, 1 H), 7.24 (d, *J* = 7.9 Hz, 1 H), 7.19 - 7.10 (m, 2 H), 7.07 - 6.99 (m, 3 H), 6.96 (t, *J* = 7.6 Hz, 1 H), 6.89 (d, *J* = 6.9 Hz, 1 H), 6.81 (ddd, *J* = 0.9, 7.0, 8.2 Hz, 1 H), 6.57 (dd, *J* = 1.1, 2.3 Hz, 1 H), 6.52 (d, *J* = 8.5 Hz, 2 H), 5.98 (s, 1 H), 3.77 (s, 3 H), 2.81 (s, 3 H).

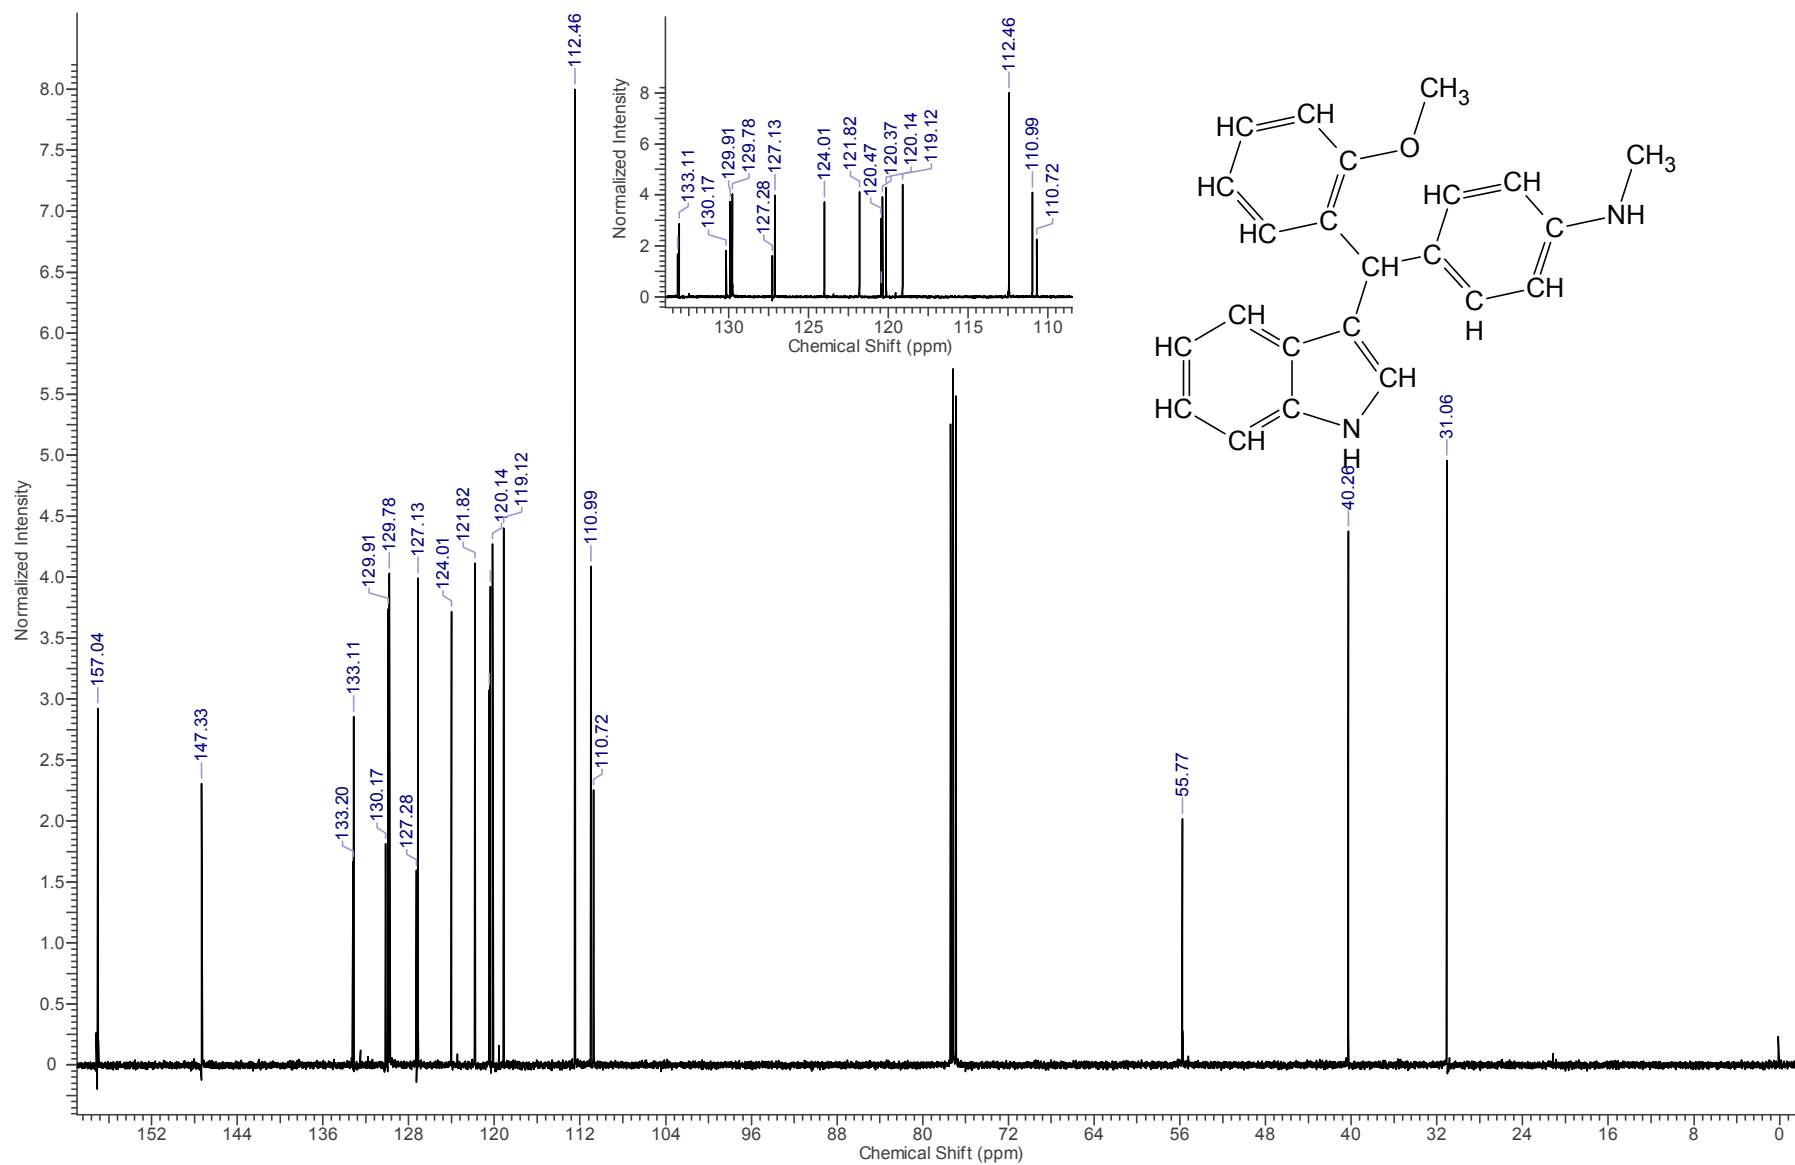

$^{13}\text{C}$  NMR (126 MHz,  $\text{CDCl}_3$ )  $\delta$  = 157.04, 147.33, 133.20, 133.11, 130.17, 129.91, 129.78, 127.28, 127.13, 124.01, 121.82, 120.47, 120.37, 120.14, 119.12, 112.46, 110.99, 110.72, 55.77, 40.26, 31.06.

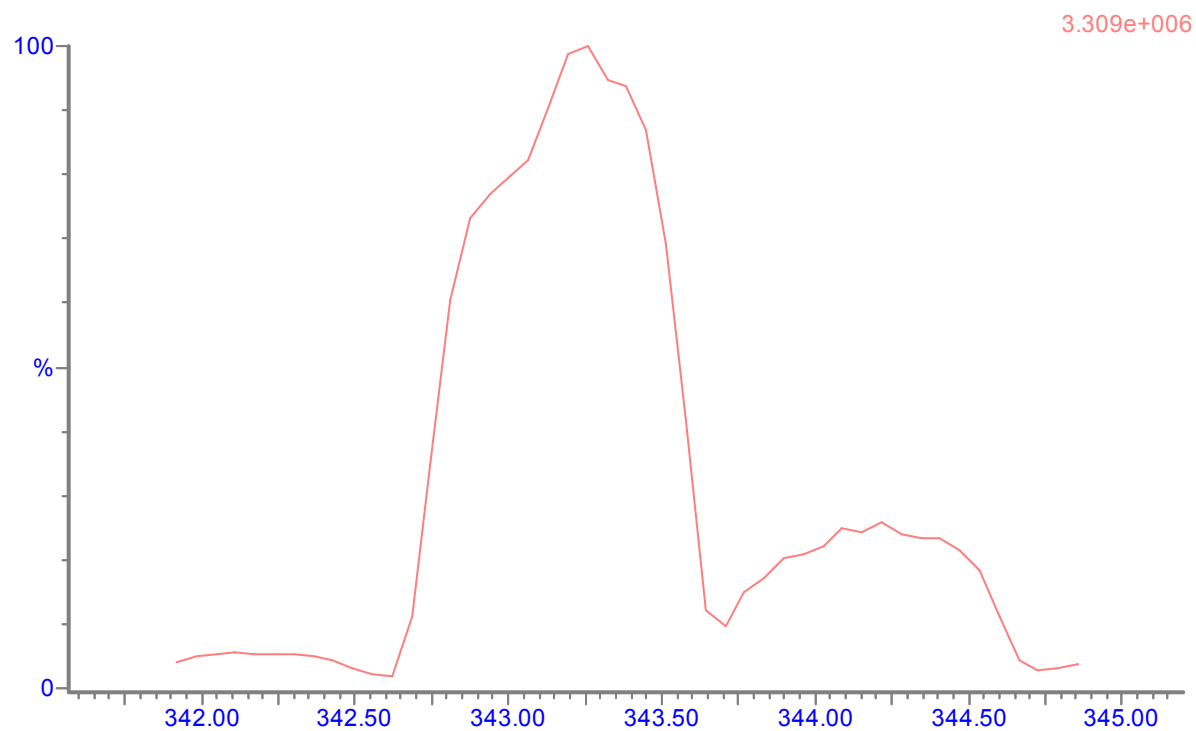

| Formula Mass | Daughter number | Parent m/z | Cone Voltage (V) | Daughters | Collision Energy (eV) | Ion Mode |
|--------------|-----------------|------------|------------------|-----------|-----------------------|----------|
| 342.43       | 1               | 343.18     | 46               | 328.10    | 22                    | ES+      |
|              | 2               | 343.18     | 46               | 226.12    | 24                    | ES+      |
|              | 3               | 343.18     | 46               | 235.92    | 24                    | ES+      |
|              | 4               | 343.18     | 46               | 204.02    | 70                    | ES+      |

**1.8 3-methoxybenzaldehyde (1h) + indole (2a) + N-methylaniline (3a): (6h) 4-[1H-indol-3-yl(3-methoxyphenyl)methyl]-N-methylaniline**

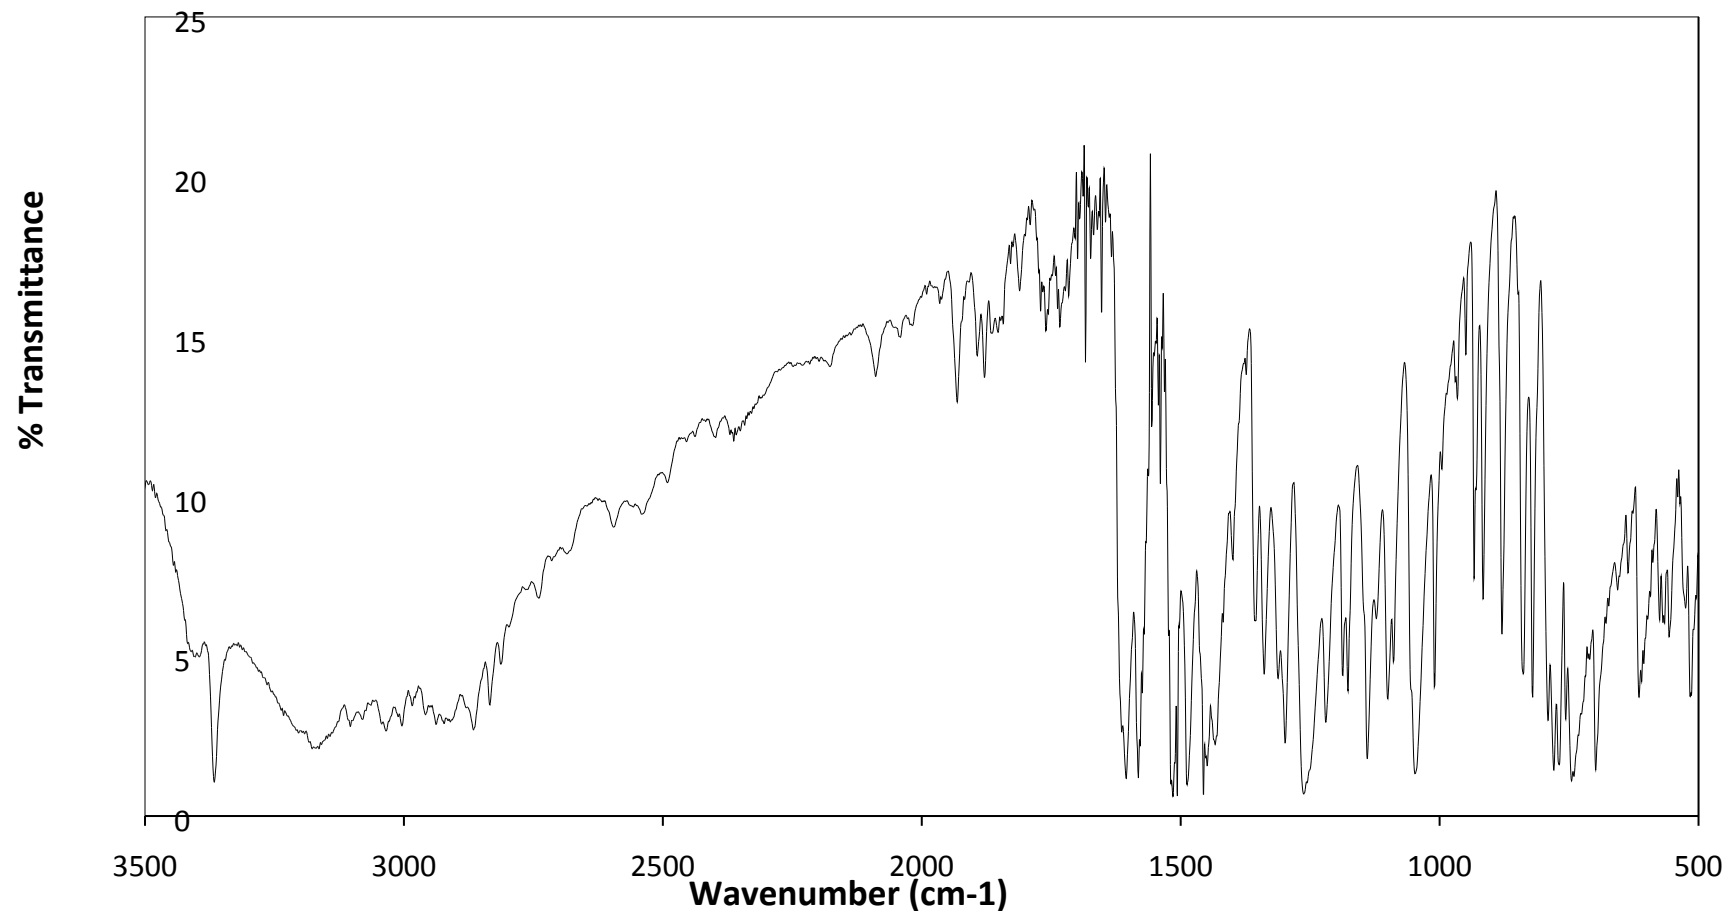

IR (KBr,  $\text{cm}^{-1}$ ): 3406 (m), 3367 (s), 3169 (s), 3103 (s), 3084 (s), 3034 (s), 3003 (s), 2983 (s), 2958 (s), 2937 (s), 2922 (s), 2866 (s), 2833 (w), 1683 (w), 1604 (s), 1581 (s), 1539 (w), 1516 (s), 1506 (s), 1487 (s), 1456 (s), 1448 (s), 1433 (s), 1355 (m), 1338 (m), 1298 (m), 1263 (s), 1219 (m), 1139 (m), 1099 (m), 1045 (s), 1008 (m), 933 (m), 916 (m), 879 (m), 839 (m), 819 (m), 779 (s), 767 (s), 744 (s), 698 (s), 615 (m).

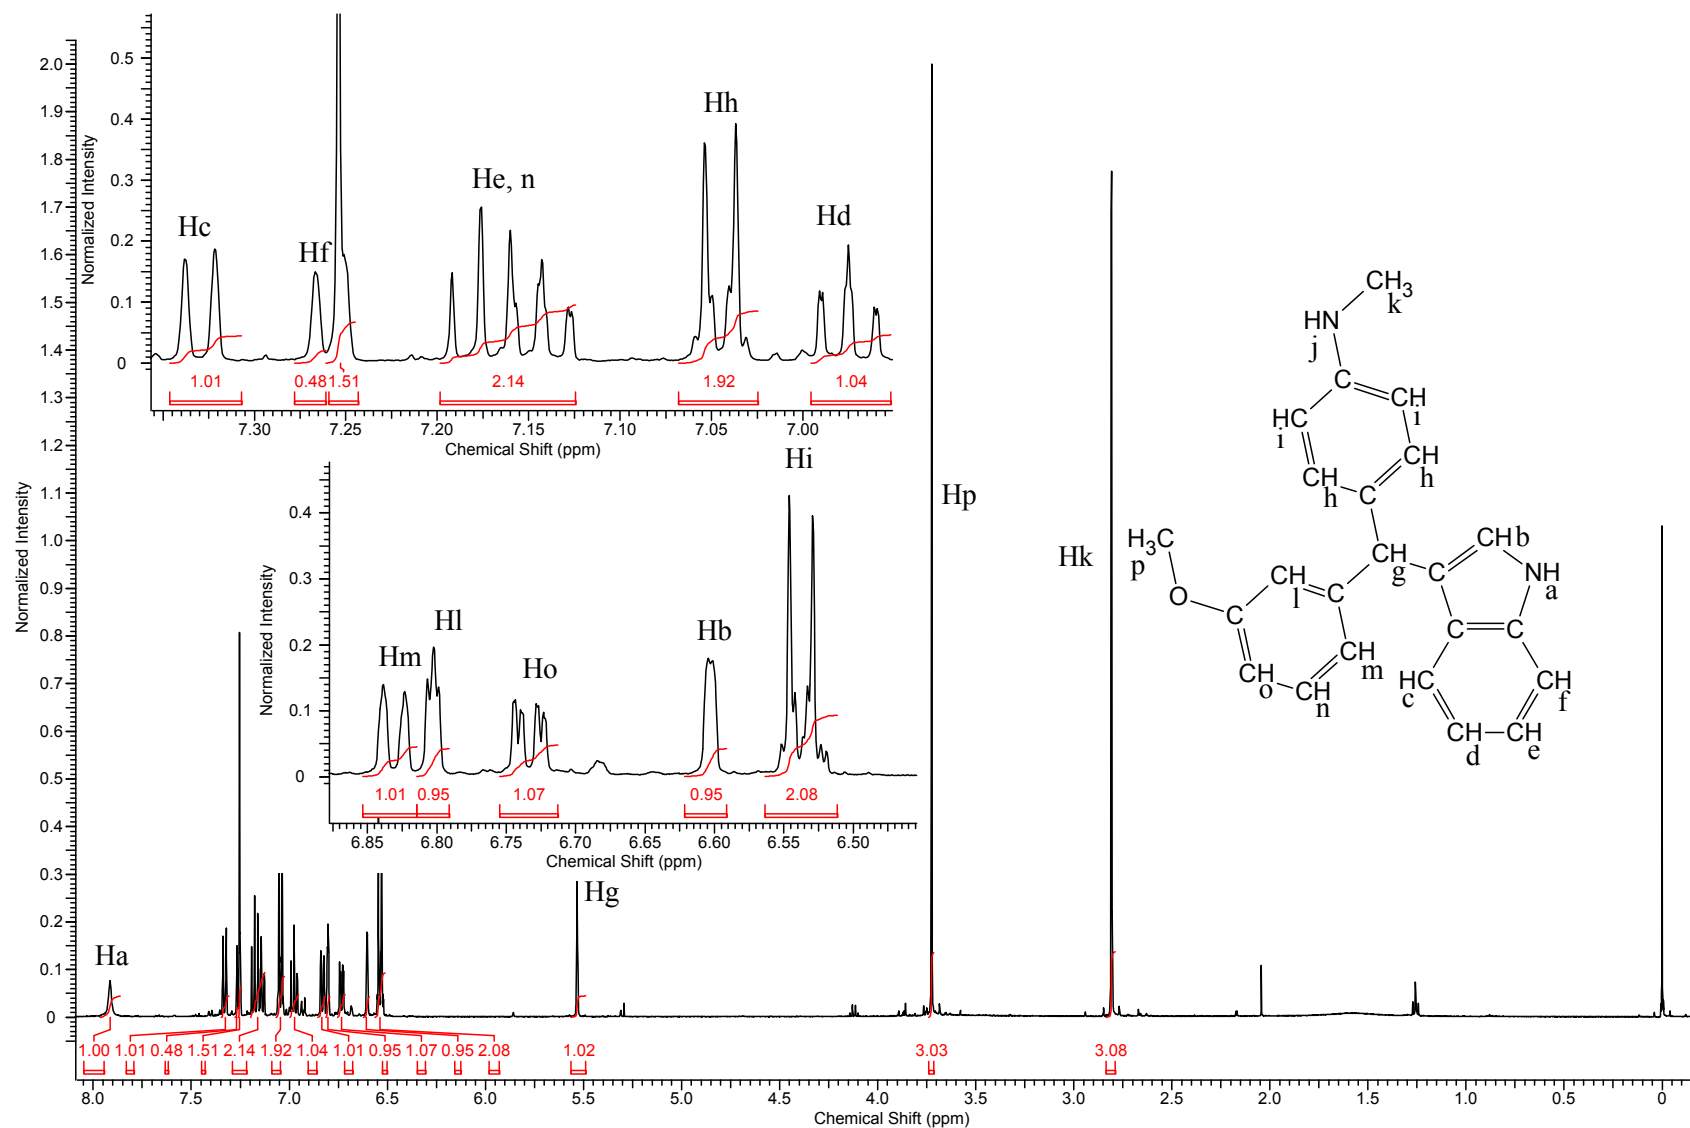

<sup>1</sup>H NMR (500MHz, CDCl<sub>3</sub>) δ = 7.91 (br s, 1 H), 7.33 (d, *J* = 8.2 Hz, 1 H), 7.26 (d, *J* = 7.9 Hz, 1 H), 7.22 - 7.11 (m, 2 H), 7.05 (d, *J* = 8.5 Hz, 2 H), 6.98 (ddd, *J* = 0.9, 7.0, 8.2 Hz, 1 H), 6.83 (d, *J* = 7.6 Hz, 1 H), 6.80 (t, *J* = 2.3 Hz, 1 H), 6.73 (ddd, *J* = 0.6, 2.3, 8.2 Hz, 1 H), 6.60 (d, *J* = 1.5 Hz, 1 H), 6.54 (d, *J* = 8.5 Hz, 2 H), 5.53 (s, 1 H), 3.72 (s, 3 H), 2.81 (s, 3 H).



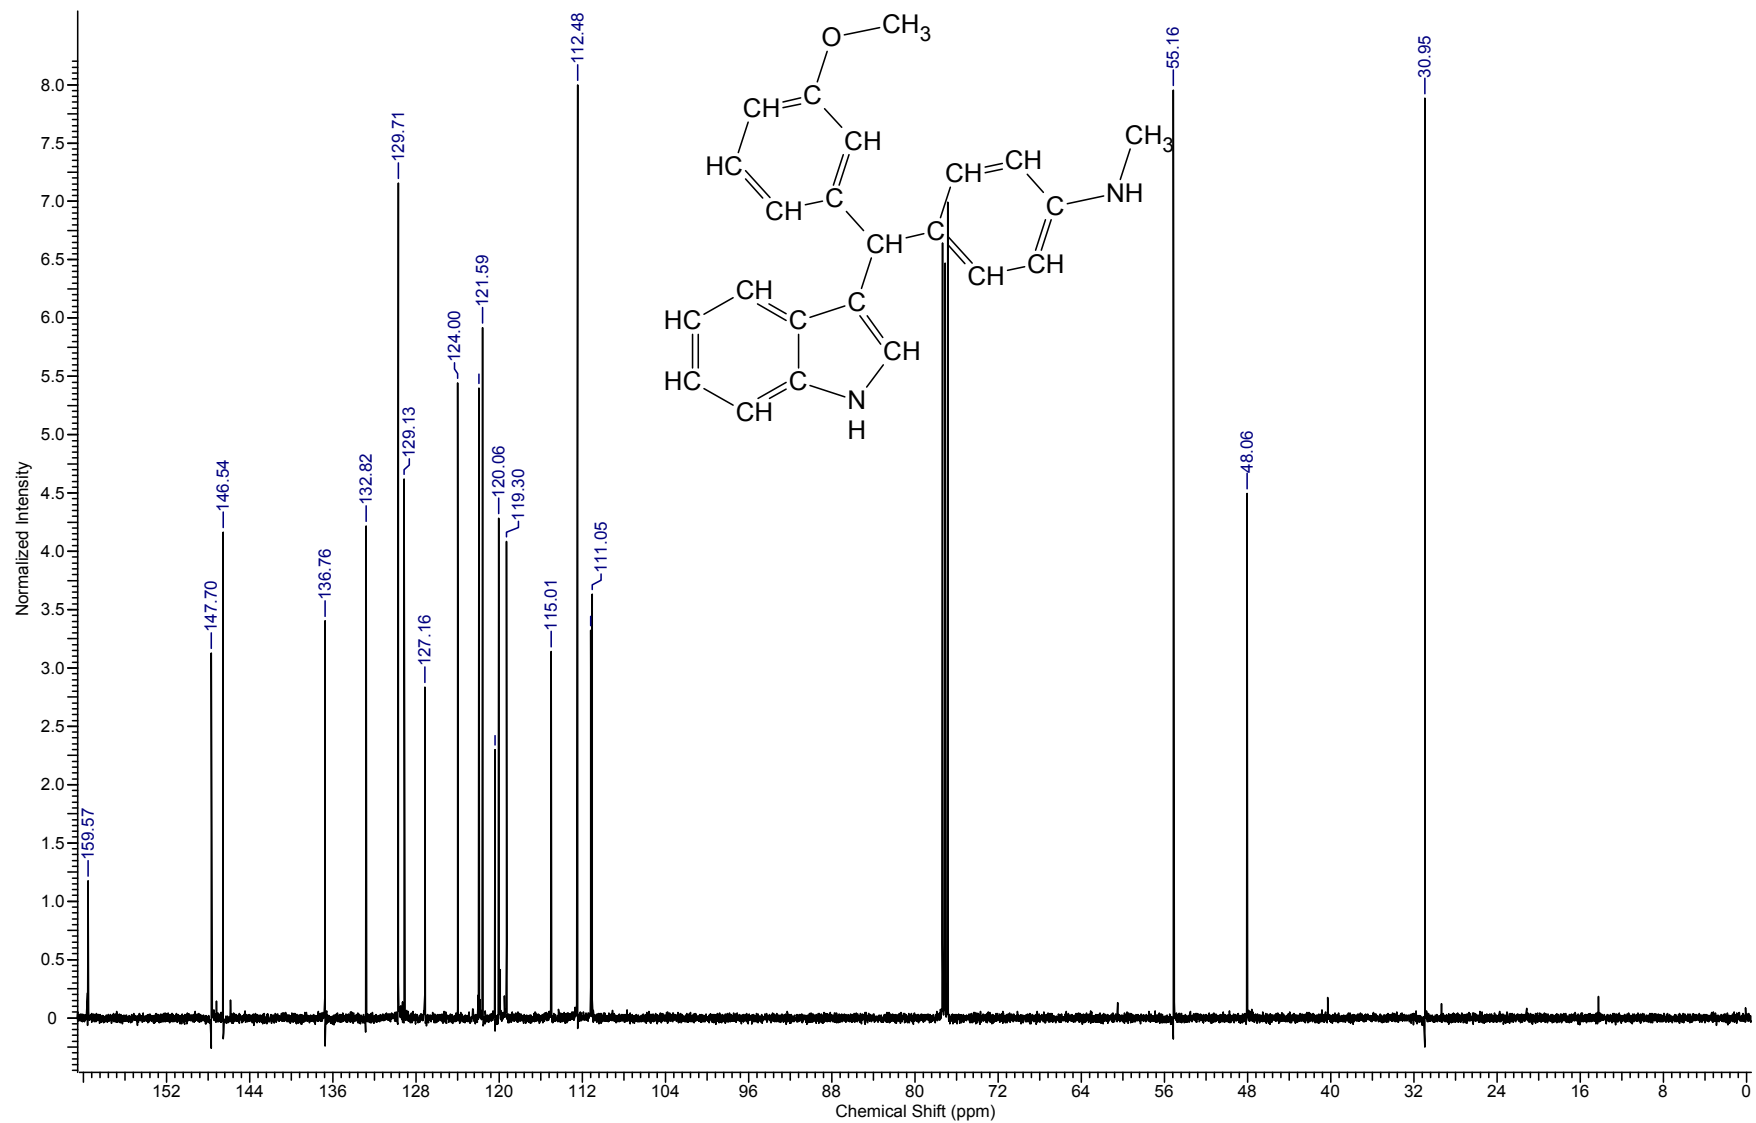

$^{13}\text{C}$  NMR (126 MHz,  $\text{CDCl}_3$ )  $\delta$  = 159.57, 147.70, 146.54, 136.76, 132.82, 129.71, 129.13, 127.16, 124.00, 121.96, 121.59, 120.41, 120.06, 119.30, 115.01, 112.48, 111.19, 111.05, 55.16, 48.06, 30.95.

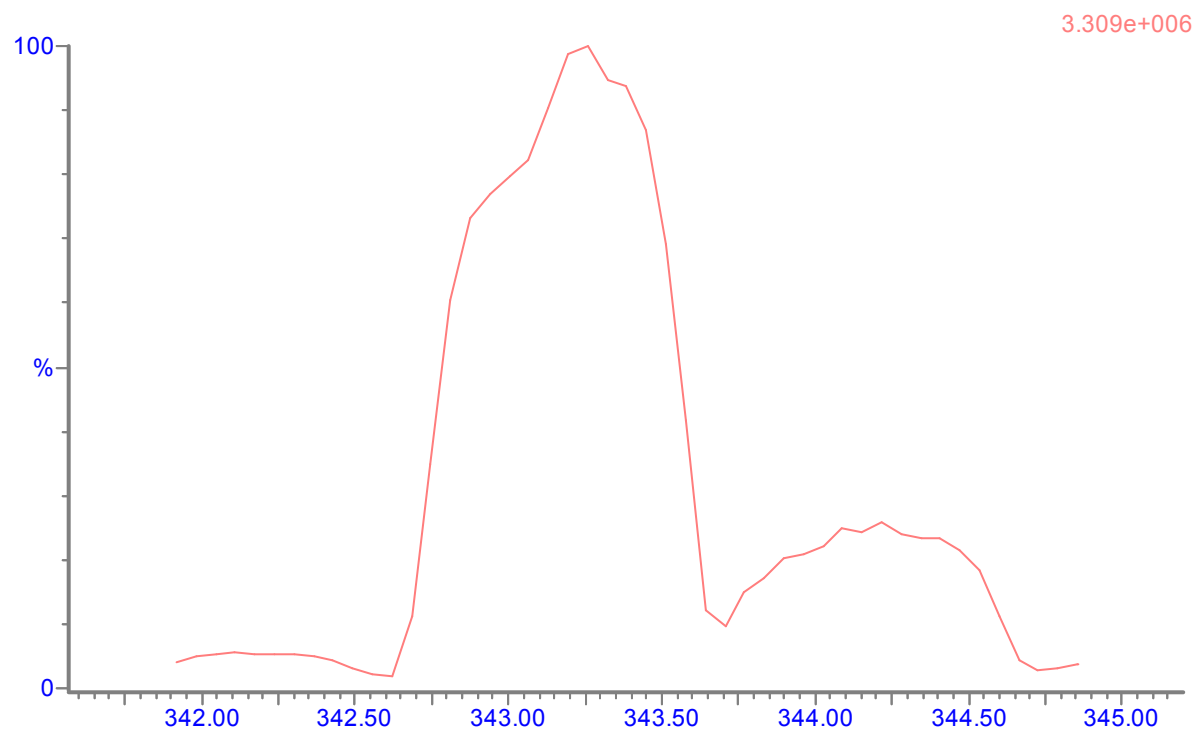

| Formula Mass | Daughter number | Parent m/z | Cone Voltage (V) | Daughters | Collision Energy (eV) | Ion Mode |
|--------------|-----------------|------------|------------------|-----------|-----------------------|----------|
| 342.4        | 1               | 343.18     | 46               | 328.10    | 22                    | ES+      |
|              | 2               | 343.18     | 46               | 226.12    | 24                    | ES+      |
|              | 3               | 343.18     | 46               | 235.92    | 24                    | ES+      |
| 3            | 4               | 343.18     | 46               | 204.02    | 70                    | ES+      |

**1.9 4-methoxybenzaldehyde (1i) + indole (2a) + N-methylaniline (3a): (6i) 4-[1H-indol-3-yl(4-methoxyphenyl)methyl]-N-methylaniline**

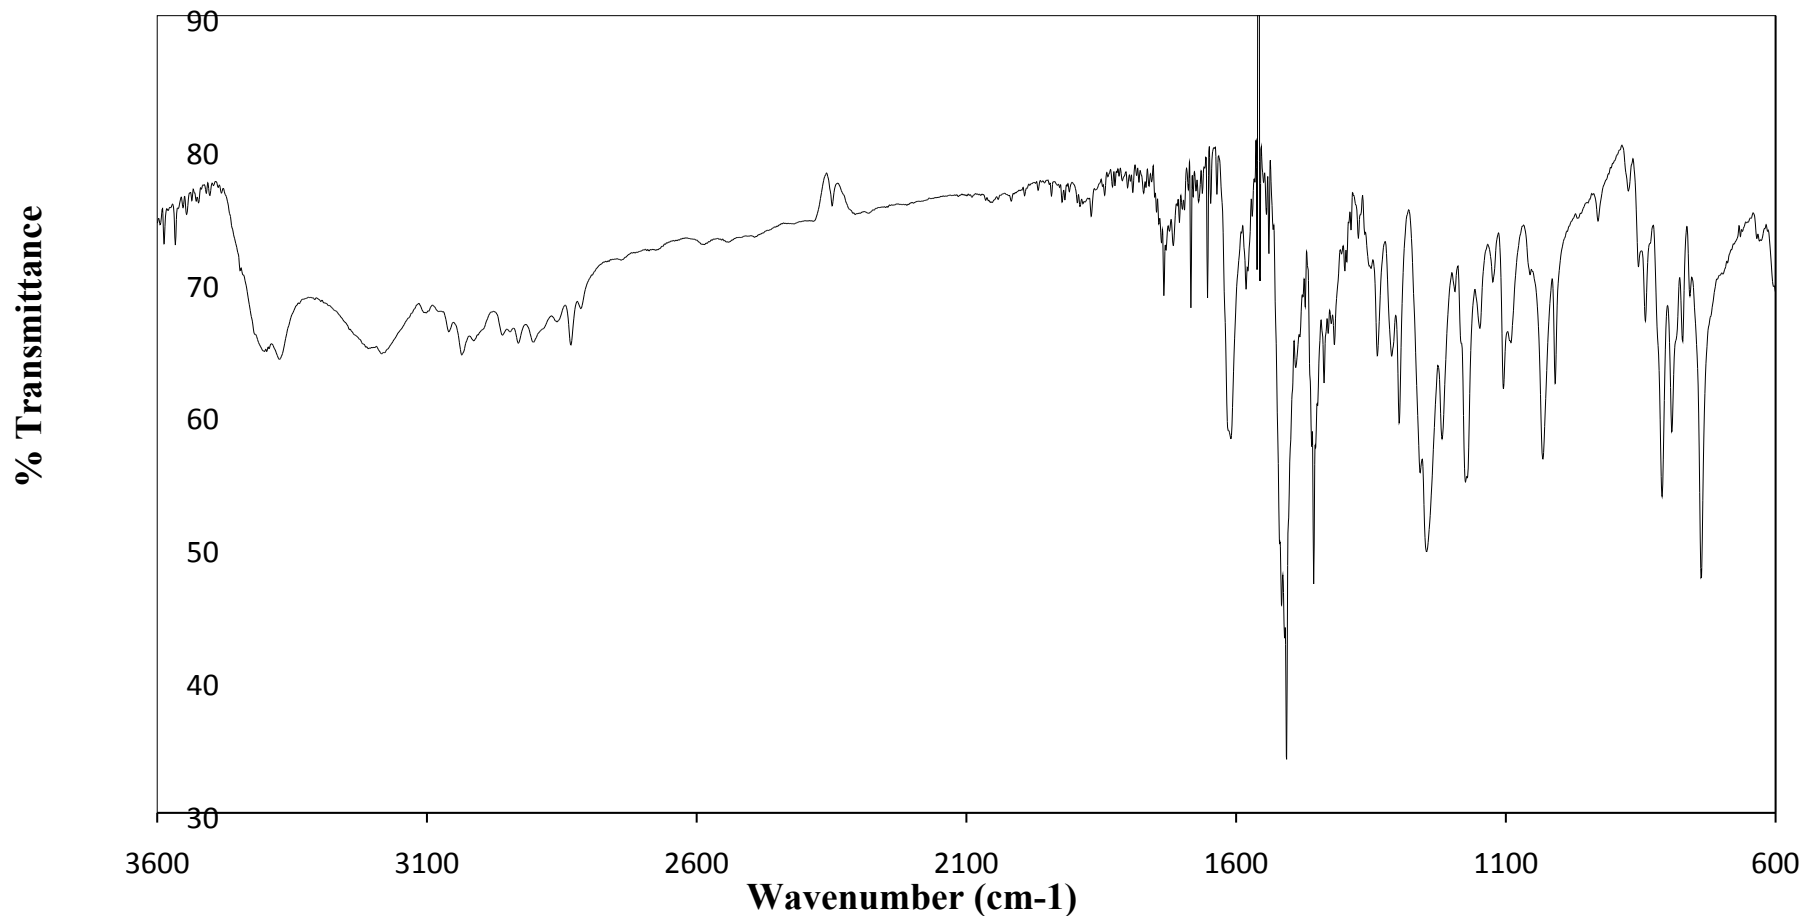

IR (KBr, cm<sup>-1</sup>): 3404 (w), 3373 (w), 3207 (w), 3182 (w), 3059 (w), 3034 (w), 3012 (w), 2931 (w), 2900 (w), 2860 (w), 2833 (w), 2812 (w), 1734 (w), 1683 (w), 1652 (w), 1610 (m), 1516 (s), 1506 (s), 1456 (s), 1338 (w), 1311 (w), 1298 (w), 1246 (m), 1219 (m), 1174 (m), 1105 (w), 1031 (m), 1008 (w), 840 (w), 810 (m), 792 (m).

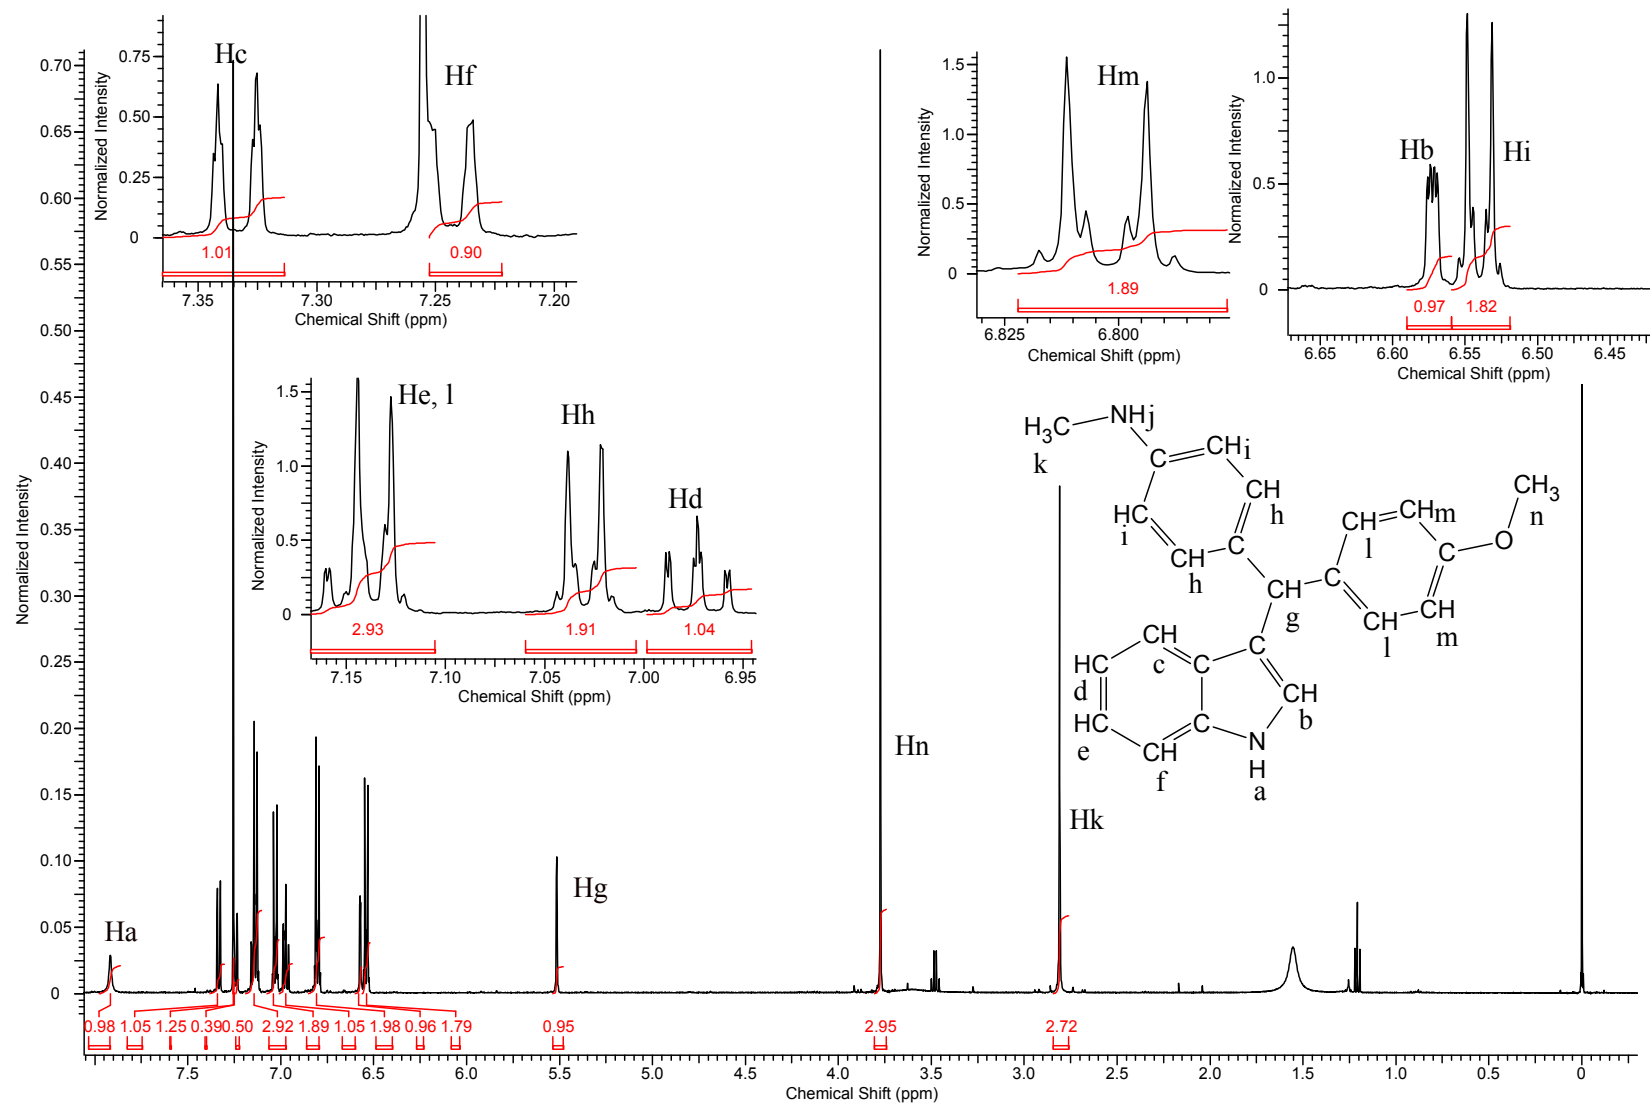

<sup>1</sup>H NMR (500MHz, CDCl<sub>3</sub>)  $\delta$  = 7.92 (br s, 1 H), 7.34 (d,  $J$  = 8.2 Hz, 1 H), 7.24 (d,  $J$  = 7.9 Hz, 1 H), 7.17 - 7.11 (m, 3 H), 7.03 (d,  $J$  = 8.5 Hz, 2 H), 6.97 (ddd,  $J$  = 1.1, 7.1, 8.2 Hz, 1 H), 6.80 (d,  $J$  = 8.9 Hz, 2 H), 6.57 (dd,  $J$  = 0.9, 2.4 Hz, 1 H), 6.54 (d,  $J$  = 8.5 Hz, 2 H), 5.52 (s, 1 H), 3.77 (s, 3 H), 2.81 (s, 3 H).

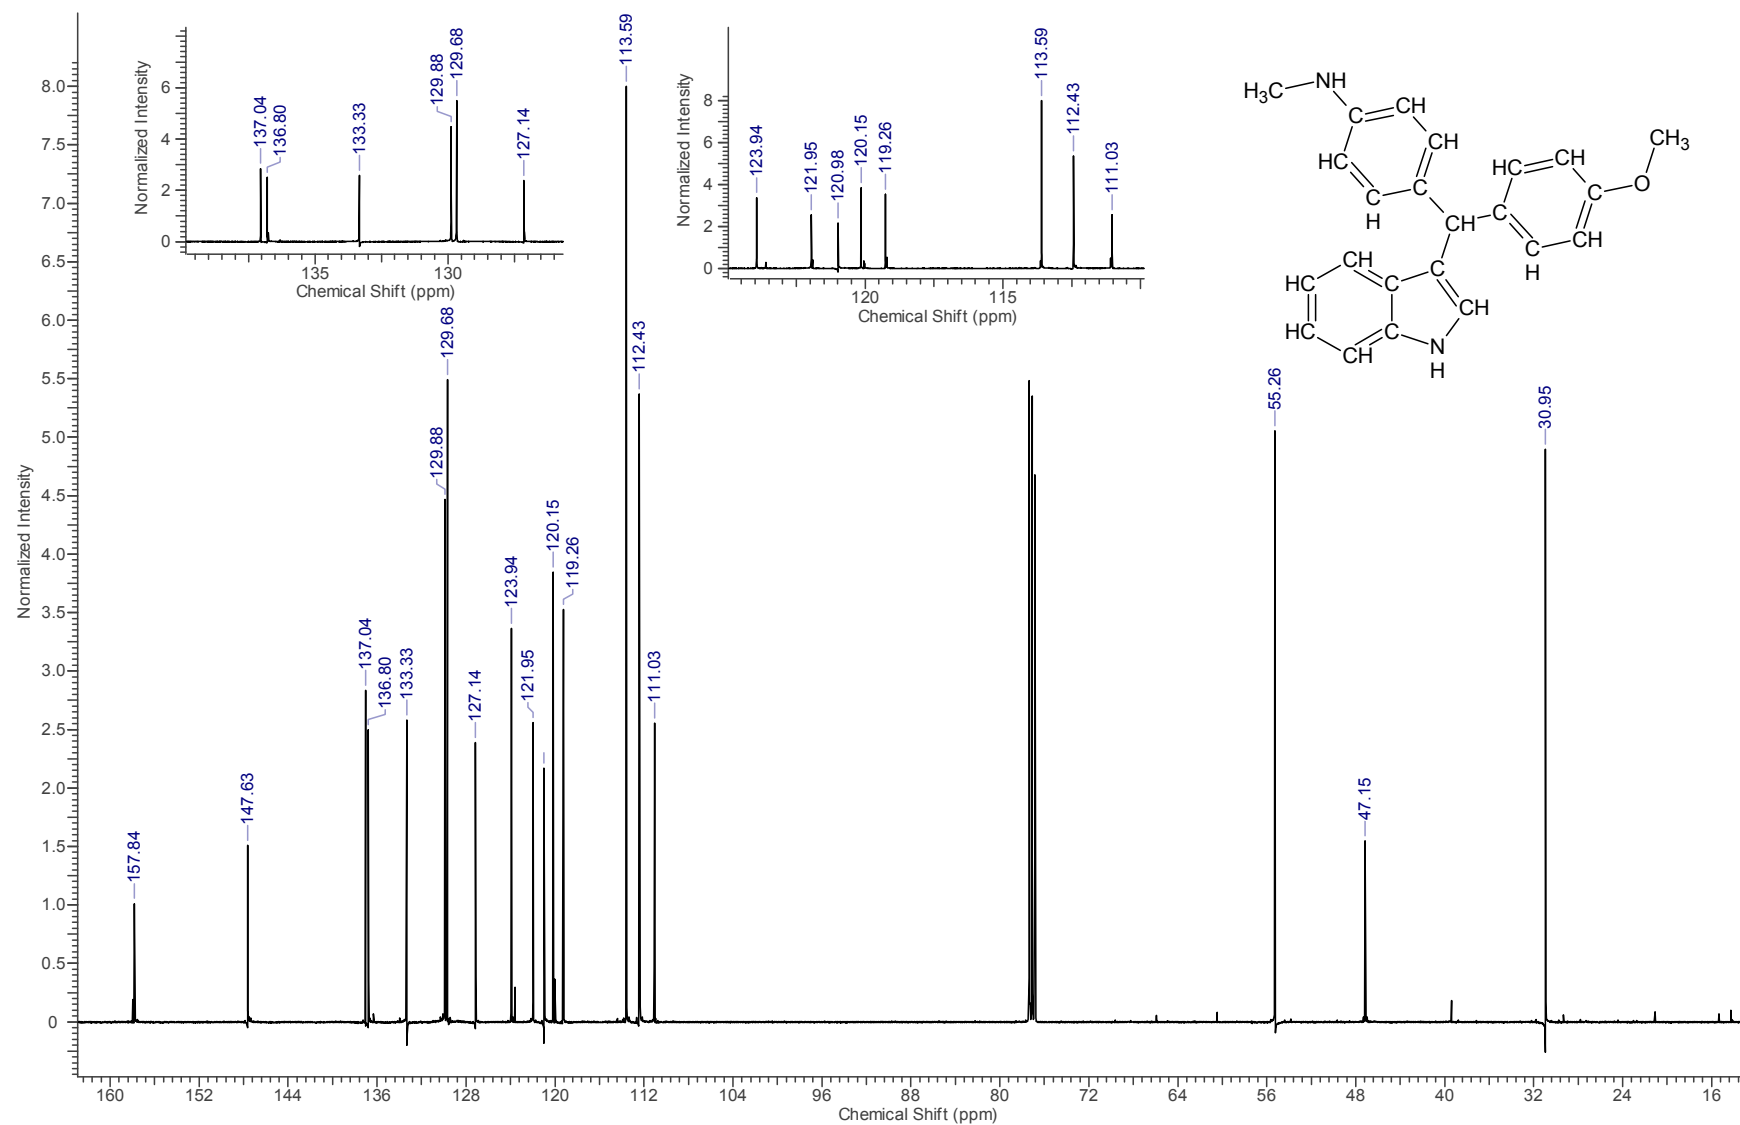

$^{13}\text{C}$  NMR (126 MHz,  $\text{CDCl}_3$ )  $\delta$  = 157.84, 147.63, 137.04, 136.80, 133.33, 129.88, 129.68, 127.14, 123.94, 121.95, 120.98, 120.15, 119.26, 113.59, 112.43, 111.03, 55.26, 47.15, 30.95.



| Formula Mass | Daughter number | Parent m/z | Cone Voltage (V) | Daughters | Collision Energy (eV) | Ion Mode |
|--------------|-----------------|------------|------------------|-----------|-----------------------|----------|
| 342.43       | 1               | 343.18     | 46               | 328.10    | 22                    | ES+      |
|              | 2               | 343.18     | 46               | 226.12    | 24                    | ES+      |
|              | 3               | 343.18     | 46               | 235.92    | 24                    | ES+      |
|              | 4               | 343.18     | 46               | 204.02    | 70                    | ES+      |

**1.10 2-hydroxybenzaldehyde (1j) + indole (2a) + *N*-methylaniline (3a): (6j) 4-[1*H*-indol-3-yl(2-hydroxyphenyl)methyl]-*N*-methylaniline**

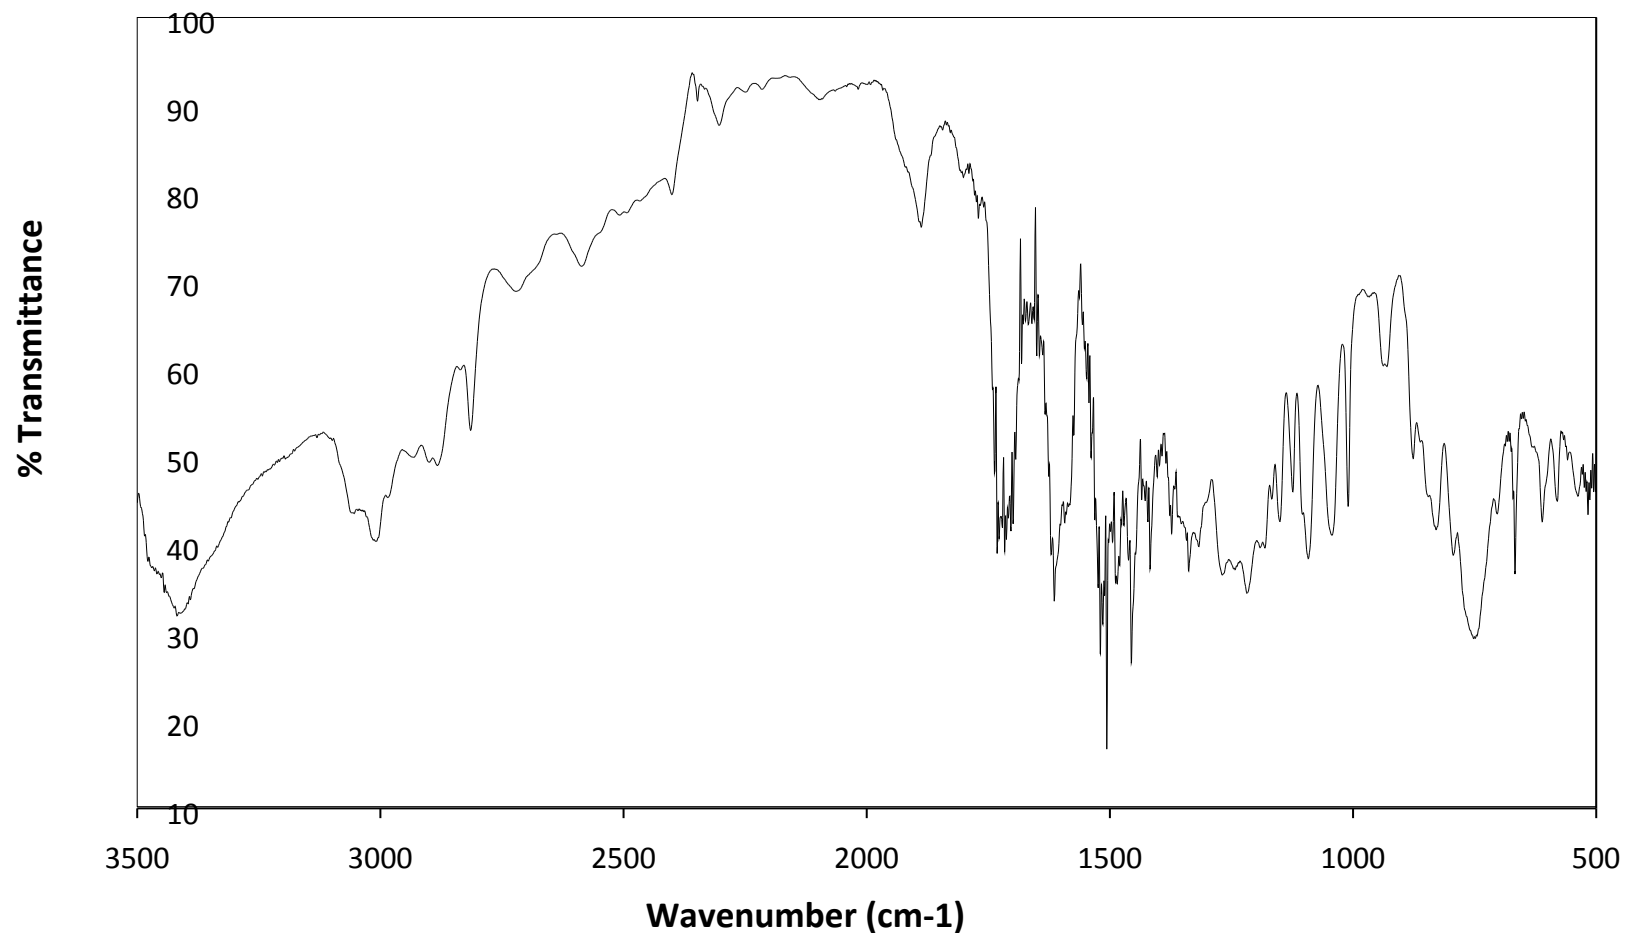

IR (KBr, cm<sup>-1</sup>): 3417 (br, m), 3057 (m), 3007 (m), 2981 (m), 2929 (m), 2904 (m), 2883 (m), 2814 (m), 1886 (w), 1732 (m), 1716 (m), 1614 (s), 1519 (s), 1506 (s), 1456 (s), 1417 (m), 1338 (m), 1265 (m), 1242 (m), 1219 (m), 1149 (m), 1091 (m), 1043 (m), 1010 (m), 937 (w), 875 (m), 829 (m), 794 (m), 748 (s), 704 (w), 667 (m), 611 (m).

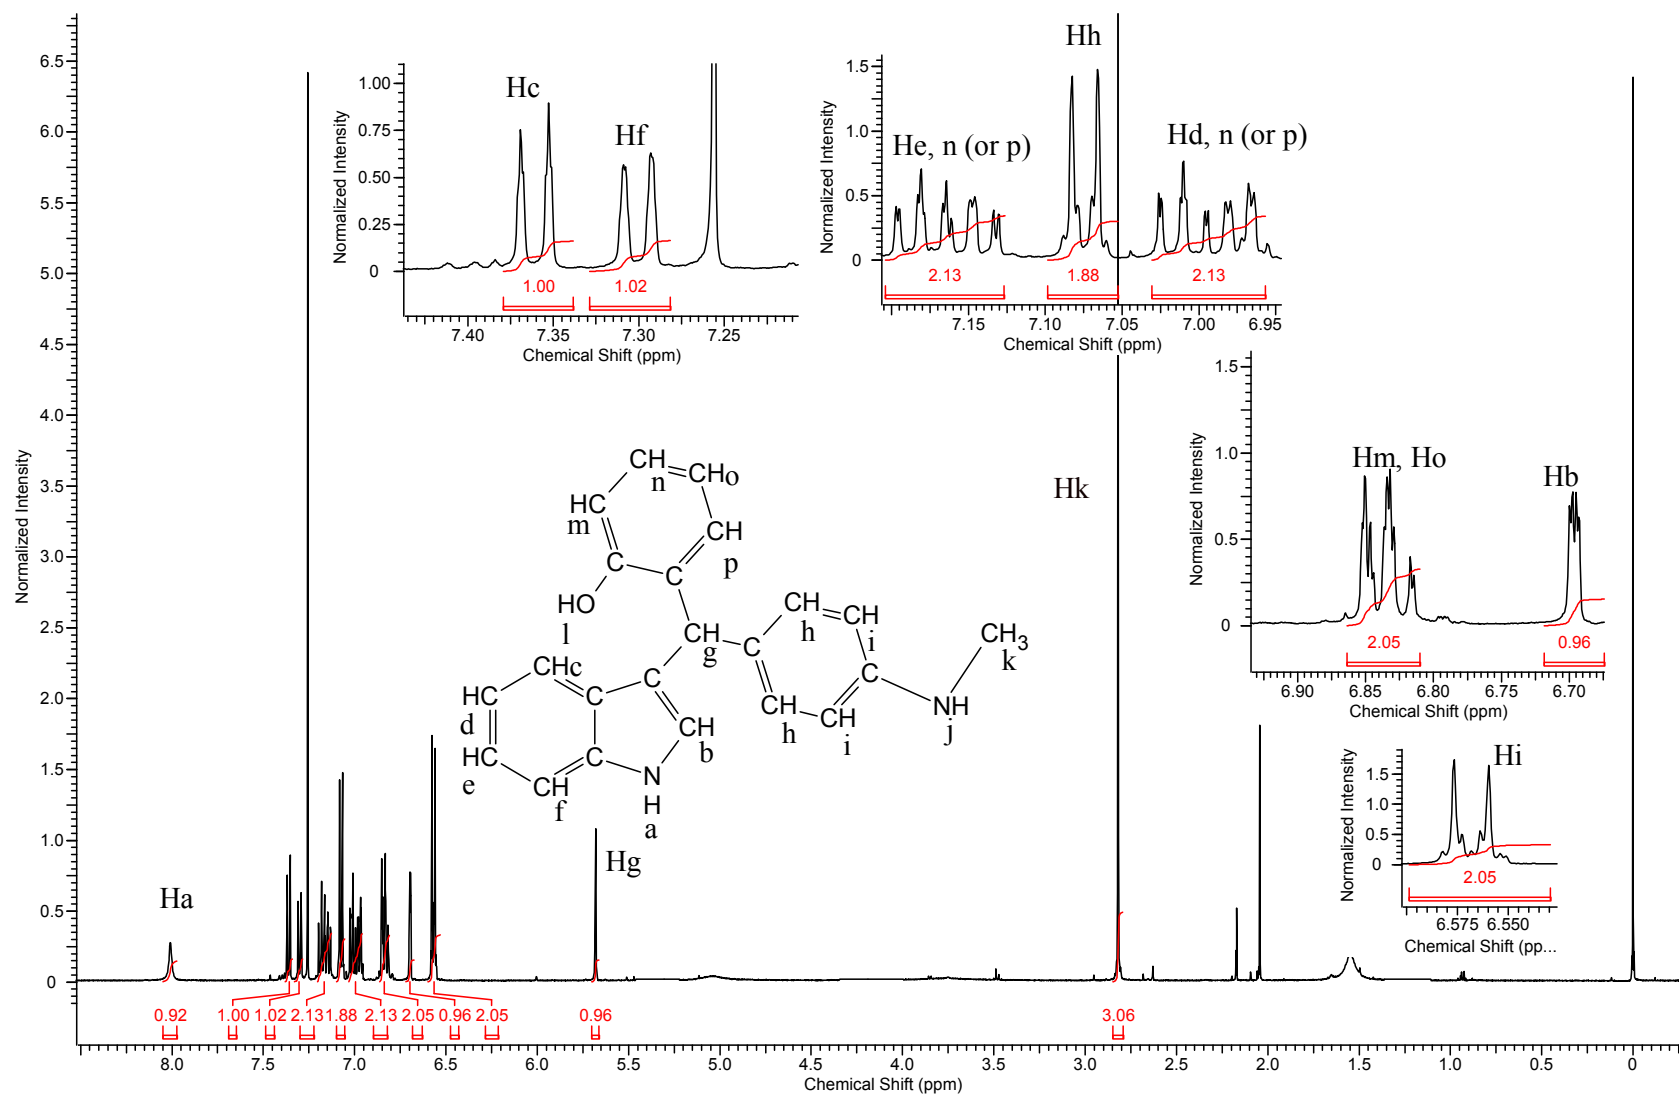

<sup>1</sup>H NMR (500MHz, CDCl<sub>3</sub>)  $\delta$  = 8.01 (br s, 1 H), 7.36 (d,  $J$  = 8.2 Hz, 1 H), 7.31 (d,  $J$  = 7.9 Hz, 1 H), 7.20 - 7.13 (m, 2 H), 7.08 (d,  $J$  = 8.5 Hz, 2 H), 7.03 - 6.96 (m, 2 H), 6.86 - 6.81 (m, 2 H), 6.70 (dd,  $J$  = 1.1, 2.3 Hz, 1 H), 6.57 (d,  $J$  = 8.5 Hz, 2 H), 5.68 (s, 1 H), 2.82 (s, 3 H).



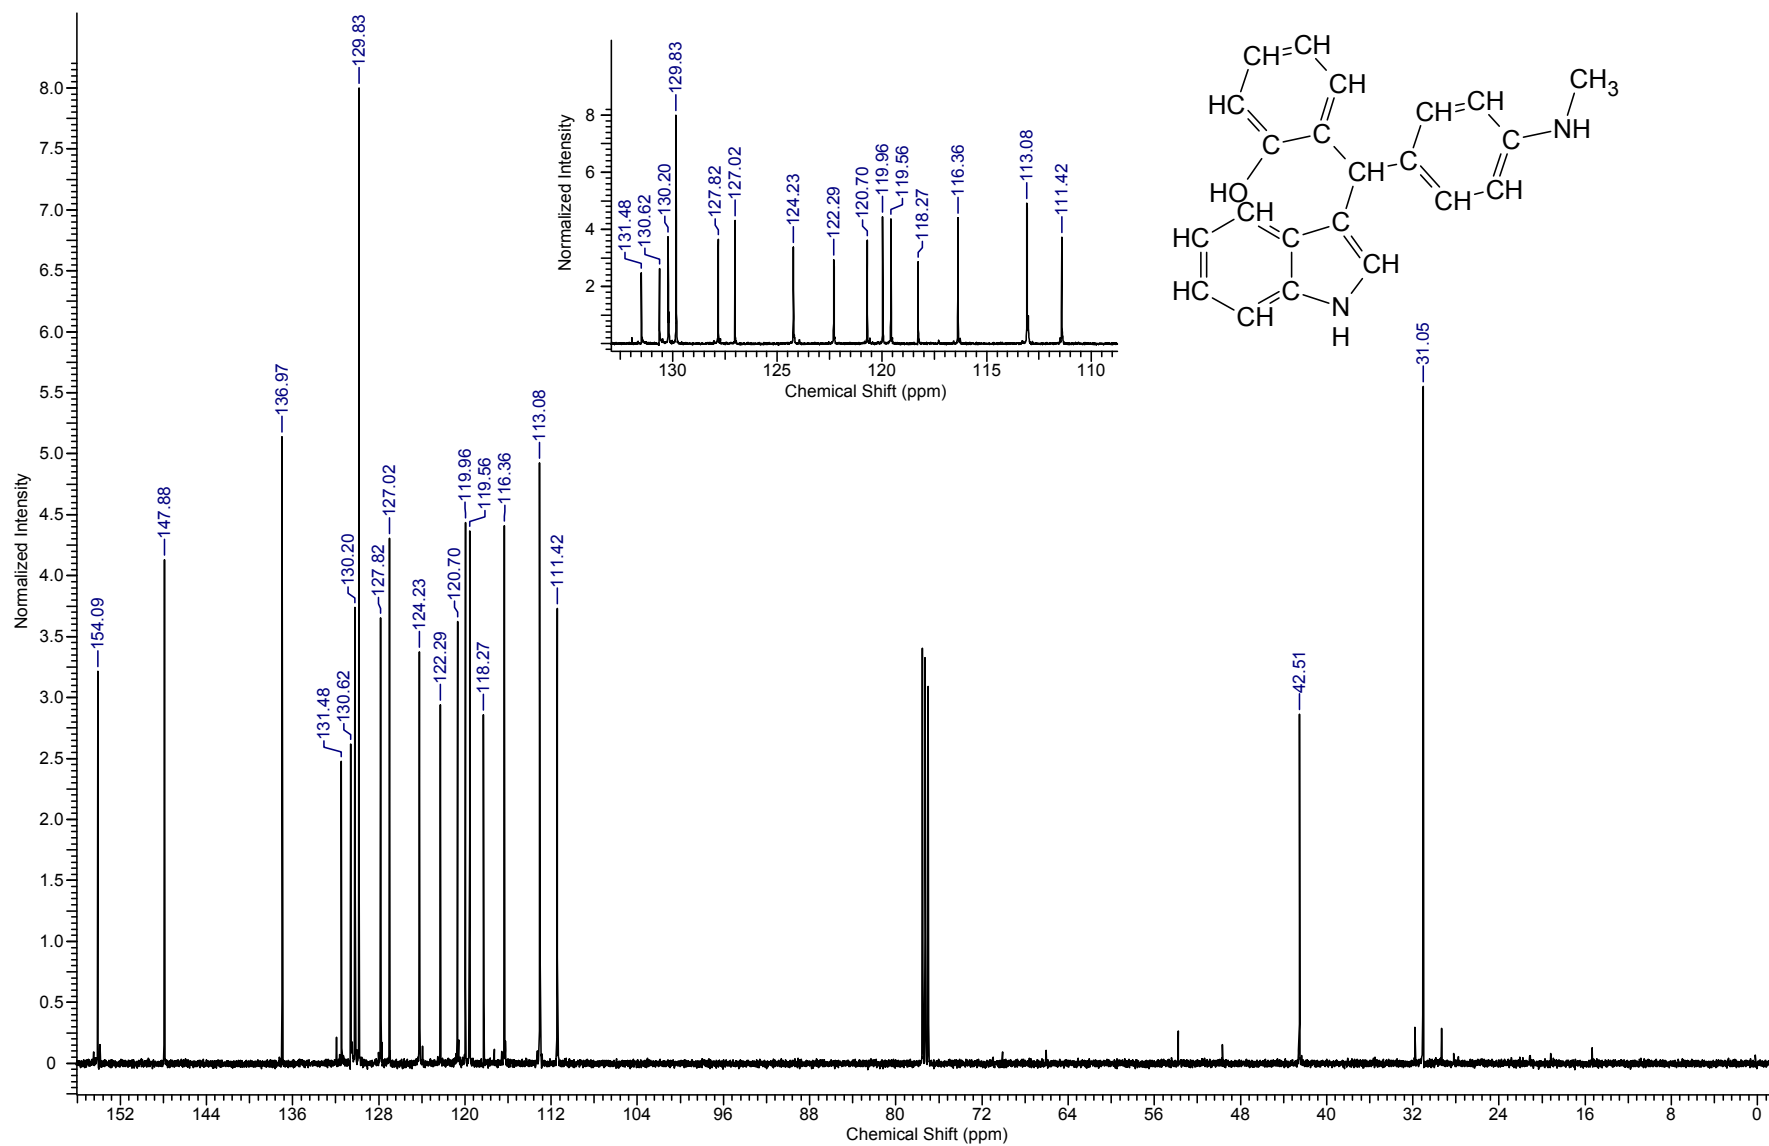

$^{13}\text{C}$  NMR (126 MHz,  $\text{CDCl}_3$ )  $\delta$  = 154.09, 147.88, 136.97, 131.48, 130.62, 130.20, 129.83, 127.82, 127.02, 124.23, 122.29, 120.70, 119.96, 119.56, 118.27, 116.36, 113.08, 111.42, 42.51, 31.05.

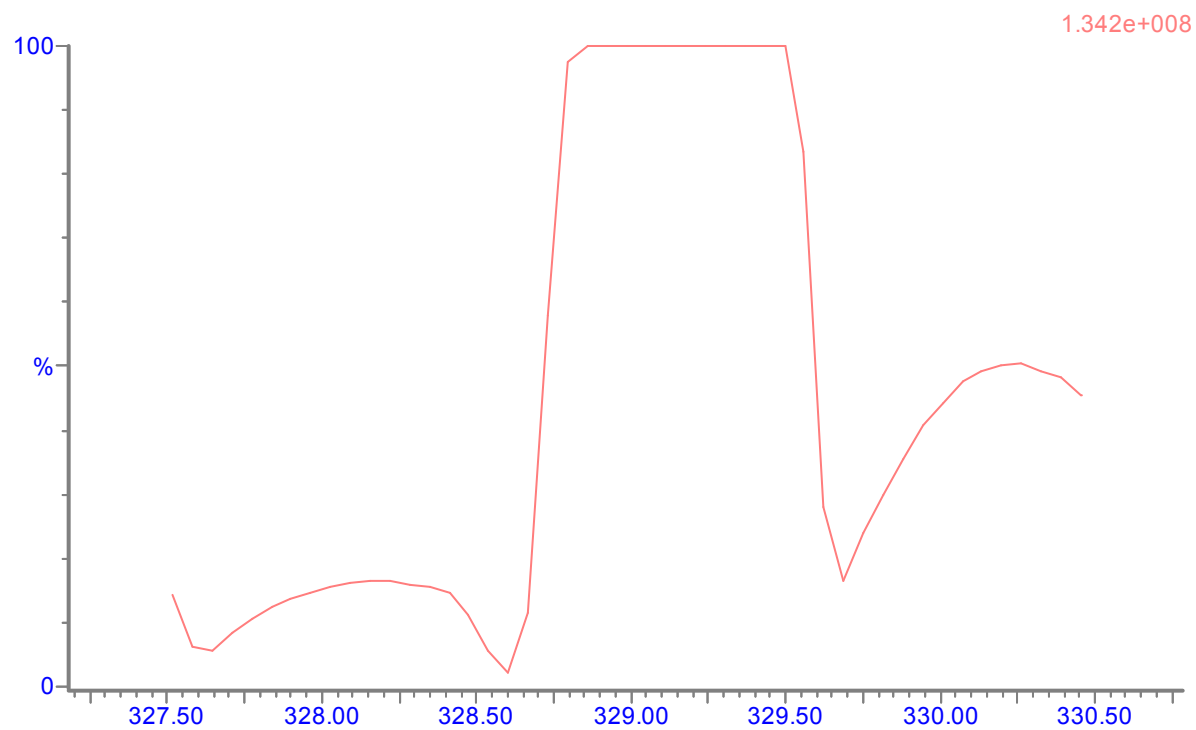

| Formula Mass | Daughter number | Parent m/z | Cone Voltage (V) | Daughters | Collision Energy (eV) | Ion Mode |
|--------------|-----------------|------------|------------------|-----------|-----------------------|----------|
| 328.41       | 1               | 329.16     | 46               | 196.09    | 32                    | ES+      |
|              | 2               | 329.16     | 46               | 212.10    | 22                    | ES+      |
|              | 3               | 329.16     | 46               | 220.28    | 34                    | ES+      |
|              | 4               | 329.16     | 46               | 180.94    | 34                    | ES+      |
|              | 5               | 329.16     | 46               | 165.14    | 62                    | ES+      |

**1.11 3-hydroxybenzaldehyde (1k) + indole (2a) + *N*-methylaniline (3a): (6k) 4-[1*H*-indol-3-yl(3-hydroxyphenyl)methyl]-*N*-methylaniline**

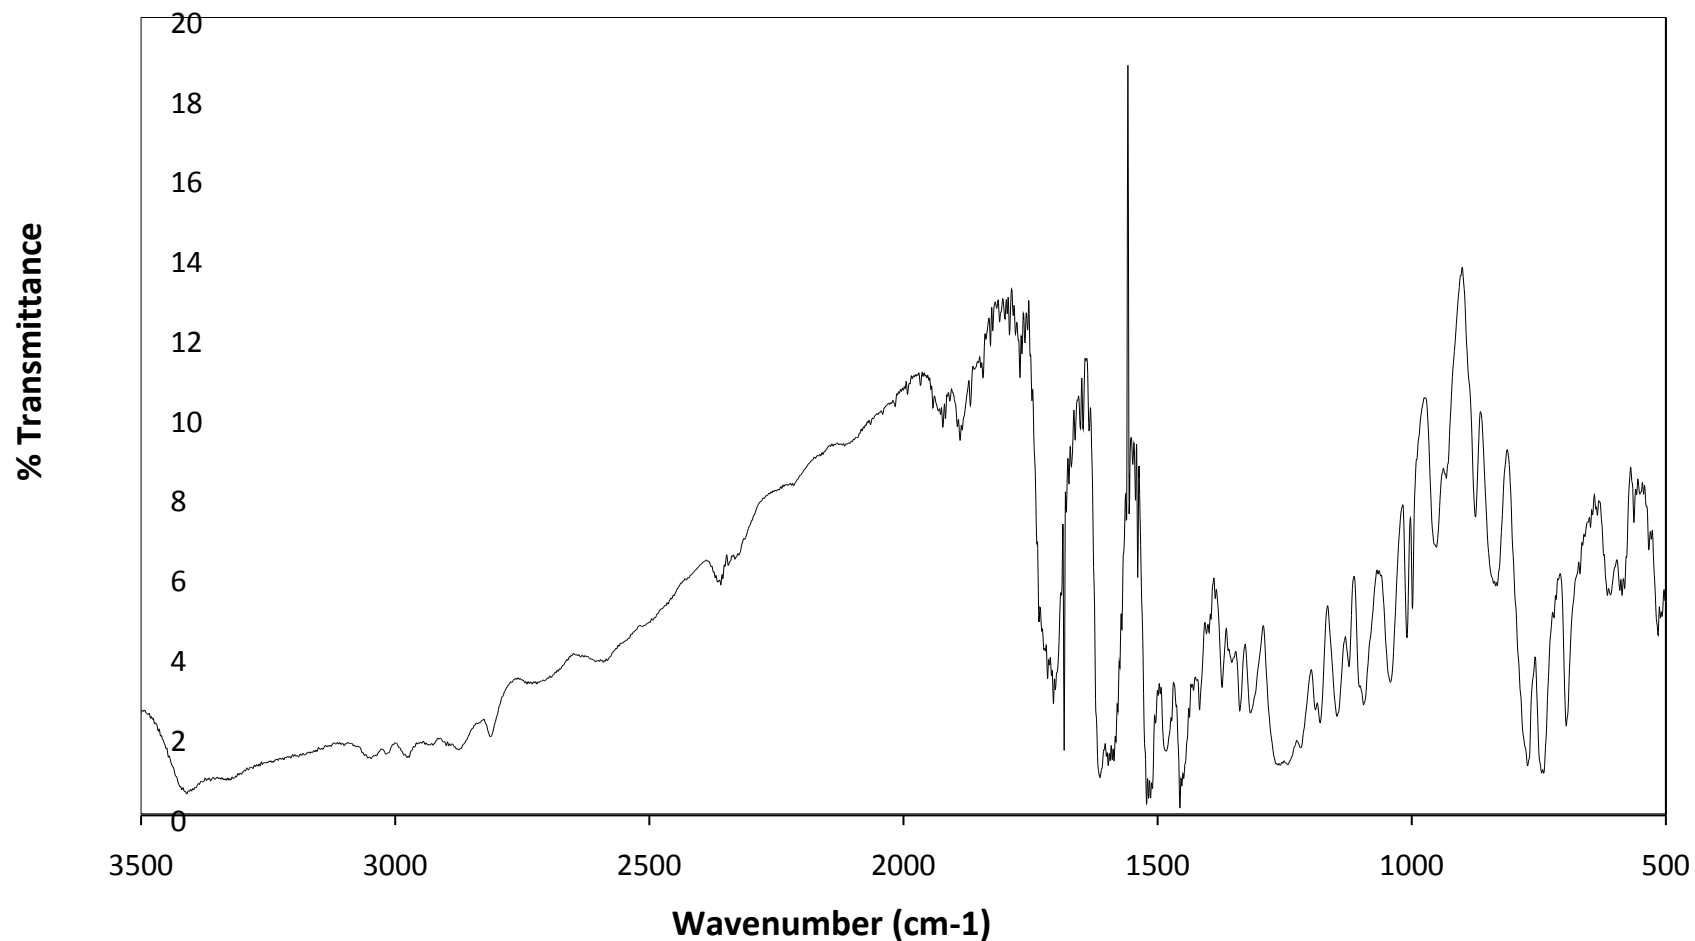

IR (KBr,  $\text{cm}^{-1}$ ): 3410 (br, m), 3331 (br, m), 3053 (s), 3012 (s), 2976 (s), 2877 (s), 2812 (s), 1716 (s), 1705 (s), 1683 (s), 1614 (s), 1521 (s), 1487 (w), 1456 (s), 1373 (m), 1338 (m), 1317 (m), 1263 (m), 1242 (m), 1219 (w), 1180 (m), 1145 (m), 1136 (m), 1093 (m), 1043 (m), 1008 (m), 999 (w), 950 (w), 931 (w), 873 (w), 835 (m), 771 (s), 740 (s), 696 (s), 607 (w).

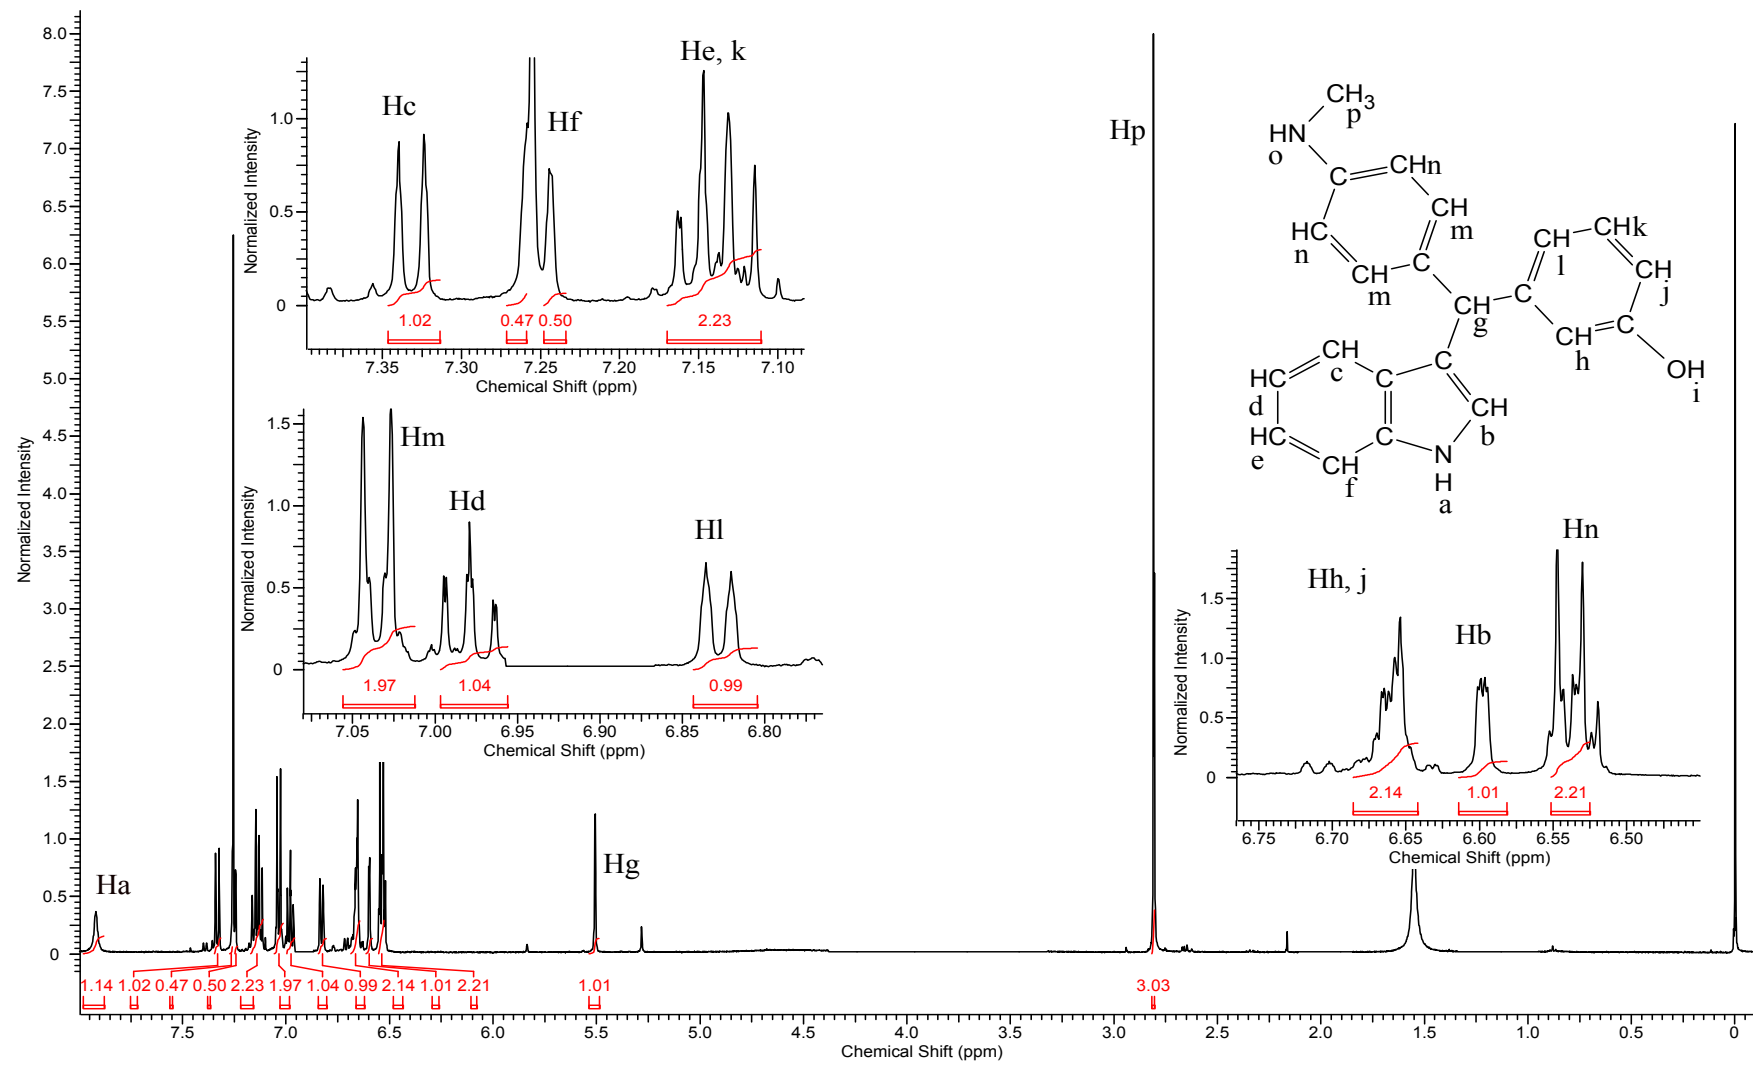

<sup>1</sup>H NMR (500MHz, CDCl<sub>3</sub>) δ = 7.92 (br s, 1 H), 7.33 (d, *J* = 7.9 Hz, 1 H), 7.25 (d, *J* = 7.9 Hz, 1 H), 7.17 – 7.09 (m, 2 H), 7.04 (d, *J* = 8.5 Hz, 2 H), 6.98 (ddd, *J* = 0.9, 7.0, 7.9 Hz, 1 H), 6.83 (d, *J* = 7.6 Hz, 1 H), 6.67 - 6.64 (m, 2 H), 6.60 (dd, *J* = 1.1, 2.3 Hz, 1 H), 6.54 (d, *J* = 8.5 Hz, 2 H), 5.51 (s, 1 H), 2.83 (s, 3 H).

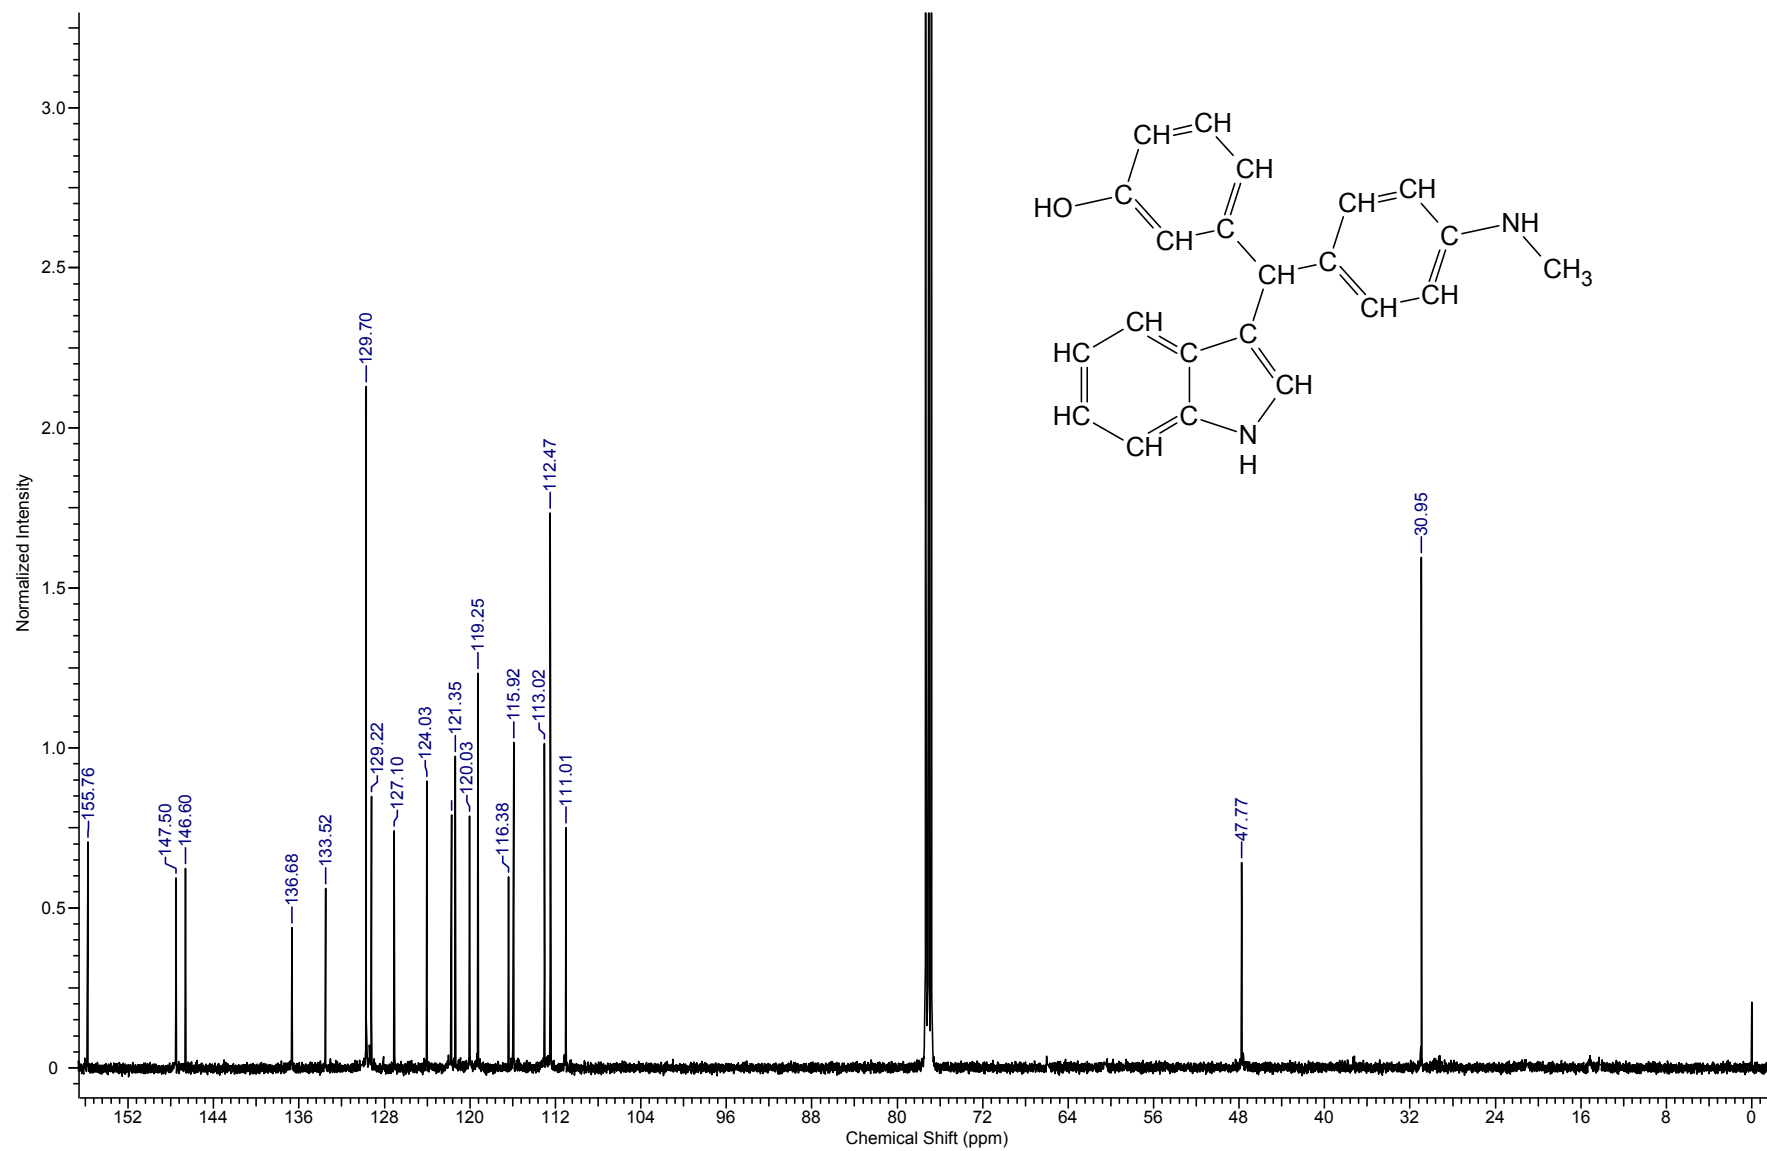

$^{13}\text{C}$  NMR (126 MHz,  $\text{CDCl}_3$ )  $\delta$  = 155.76, 147.50, 146.60, 136.68, 133.52, 129.70, 129.22, 127.10, 124.03, 121.74, 121.35, 120.03, 119.25, 116.38, 115.92, 113.02, 112.47, 111.01, 47.77, 30.95.

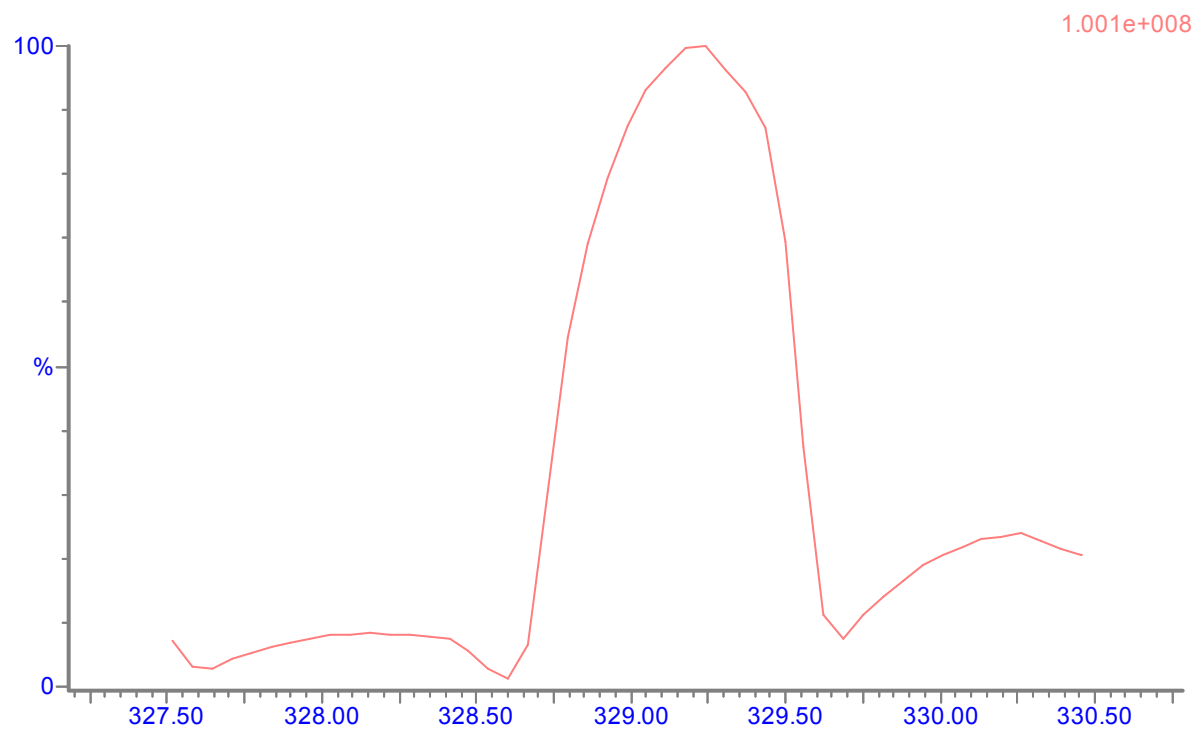

| Formula Mass | Daughter number | Parent m/z | Cone Voltage (V) | Daughters | Collision Energy (eV) | Ion Mode |
|--------------|-----------------|------------|------------------|-----------|-----------------------|----------|
| 328.41       | 1               | 329.16     | 46               | 221.20    | 28                    | ES+      |
|              | 2               | 329.16     | 46               | 212.16    | 22                    | ES+      |
|              | 3               | 329.16     | 46               | 314.14    | 16                    | ES+      |
|              | 4               | 329.16     | 46               | 196.22    | 38                    | ES+      |
|              | 5               | 329.16     | 46               | 204.16    | 50                    | ES+      |

**1.12 4-hydroxybenzaldehyde (1) + indole (2a) + *N*-Methylaniline (3a): (6l) 4-[1*H*-indol-3-yl(4-hydroxyphenyl)methyl]-*N*-methylaniline**

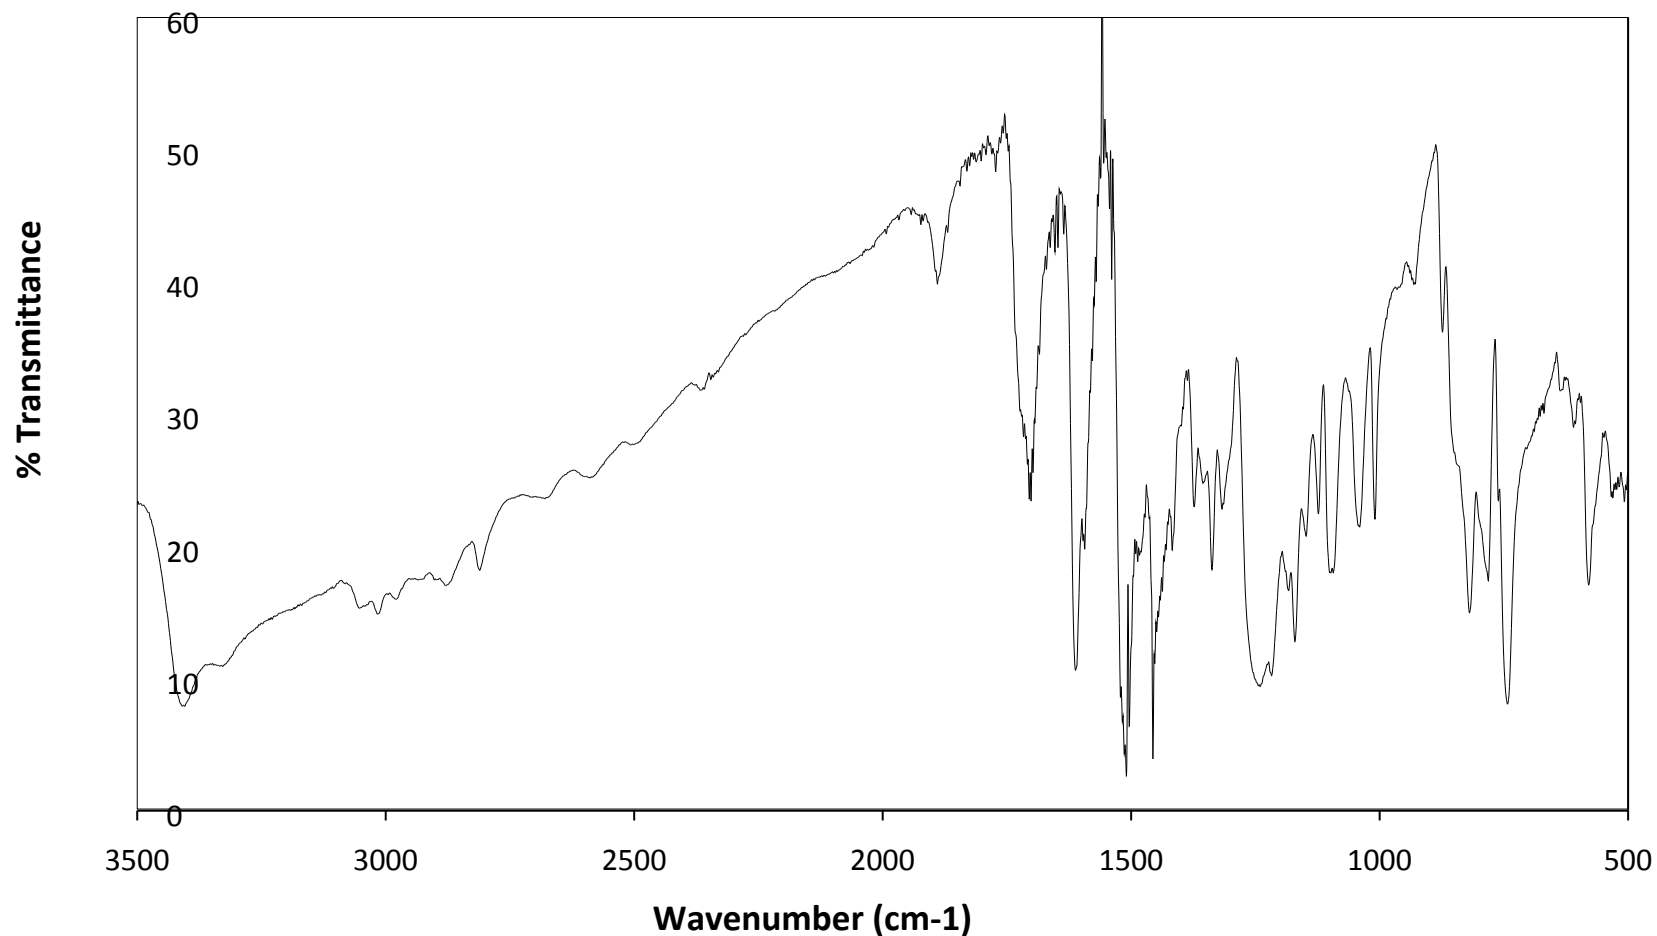

IR (KBr, cm<sup>-1</sup>): 3406 (br, m), 3332 (m), 3053 (m), 3016 (m), 2980 (m), 2881 (m), 2810 (m), 1705 (m), 1612 (s), 1593 (m), 1510 (s), 1456 (s), 1417 (m), 1338 (m), 1240 (s), 1217 (s), 1170 (m), 1101 (m), 1043 (m), 1008 (m), 873 (w), 819 (m), 781 (m), 742 (s), 632 (w), 609 (w).

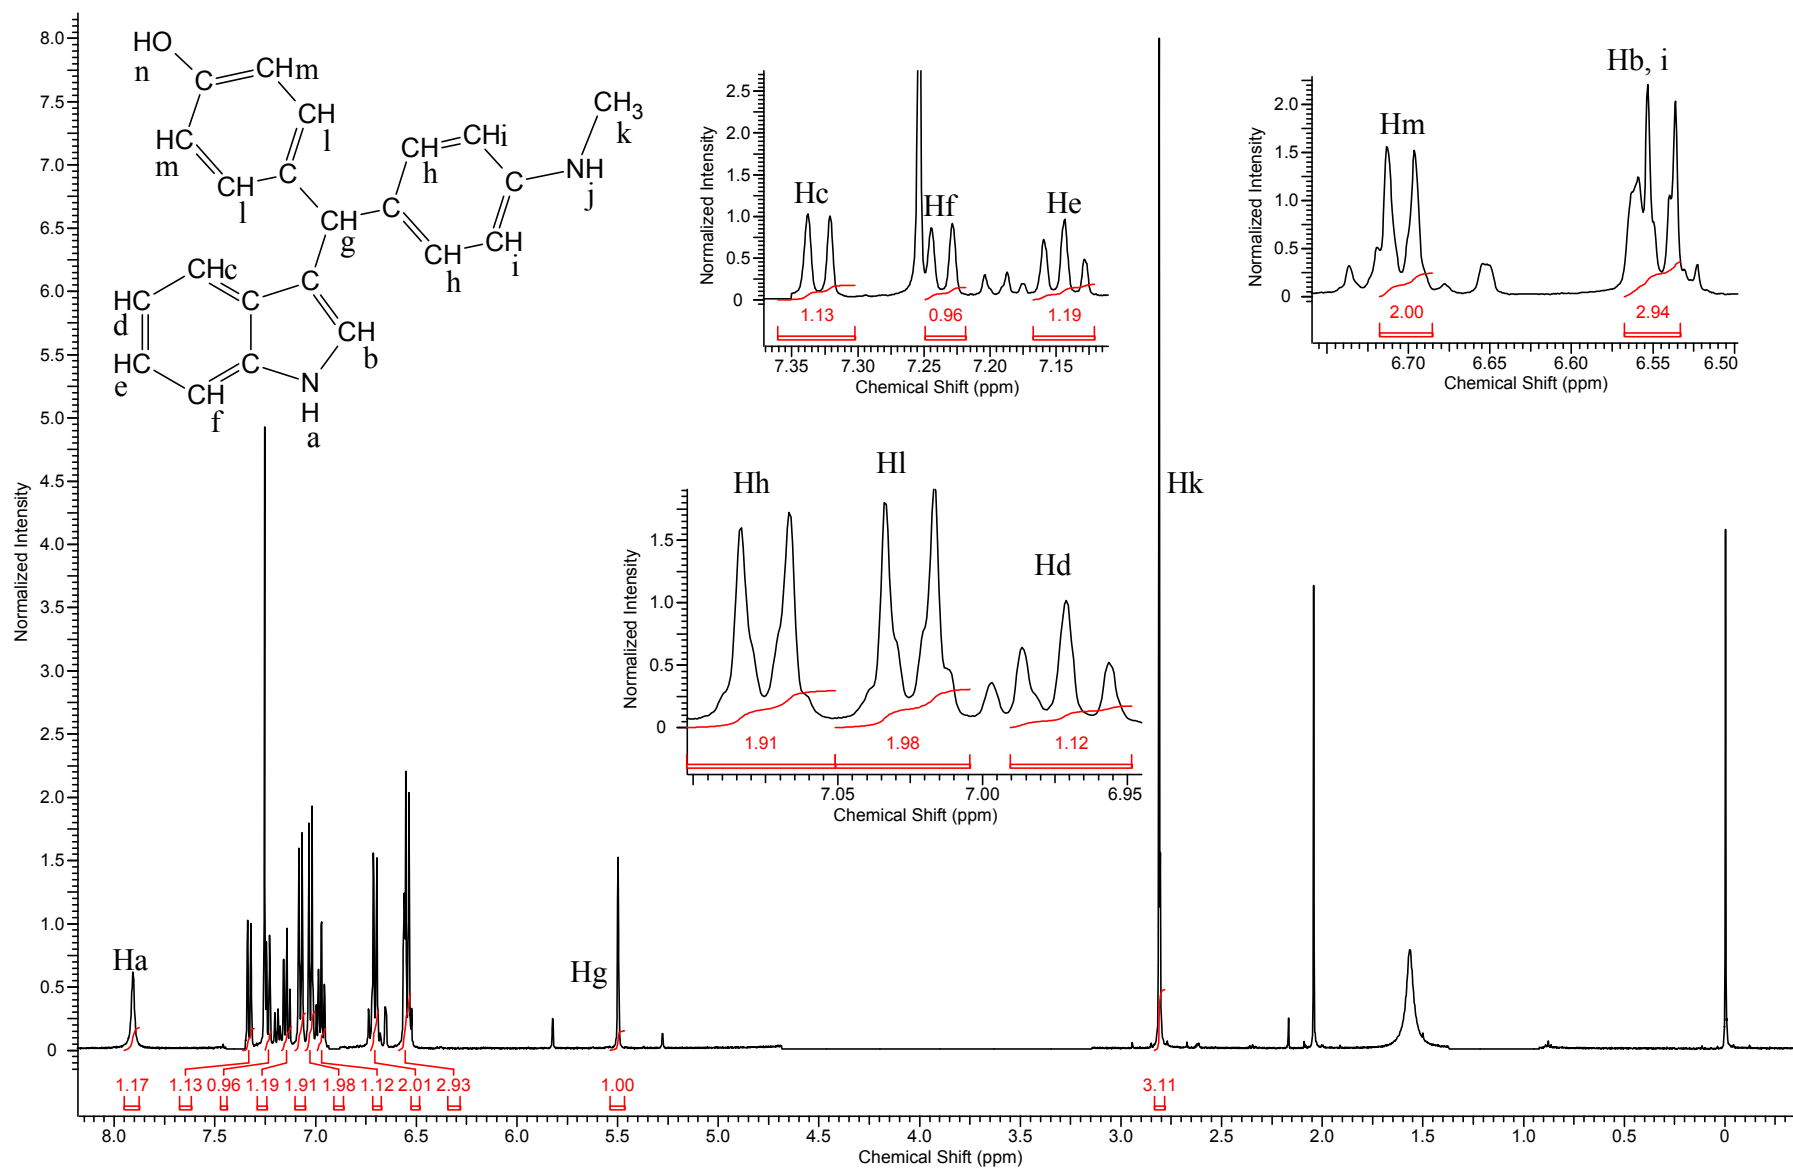

<sup>1</sup>H NMR (500MHz, CDCl<sub>3</sub>)  $\delta$  = 7.91 (br s, 1 H), 7.33 (d,  $J$  = 8.2 Hz, 1 H), 7.24 (d,  $J$  = 7.9 Hz, 1 H), 7.14 (t,  $J$  = 7.9 Hz, 1 H), 7.08 (d,  $J$  = 8.2 Hz, 2 H), 7.03 (d,  $J$  = 8.5 Hz, 2 H), 6.97 (t,  $J$  = 7.5 Hz, 1 H), 6.70 (d,  $J$  = 8.5 Hz, 2 H), 6.59 - 6.52 (m, 3 H), 5.50 (s, 1 H), 2.81 (s, 3 H).



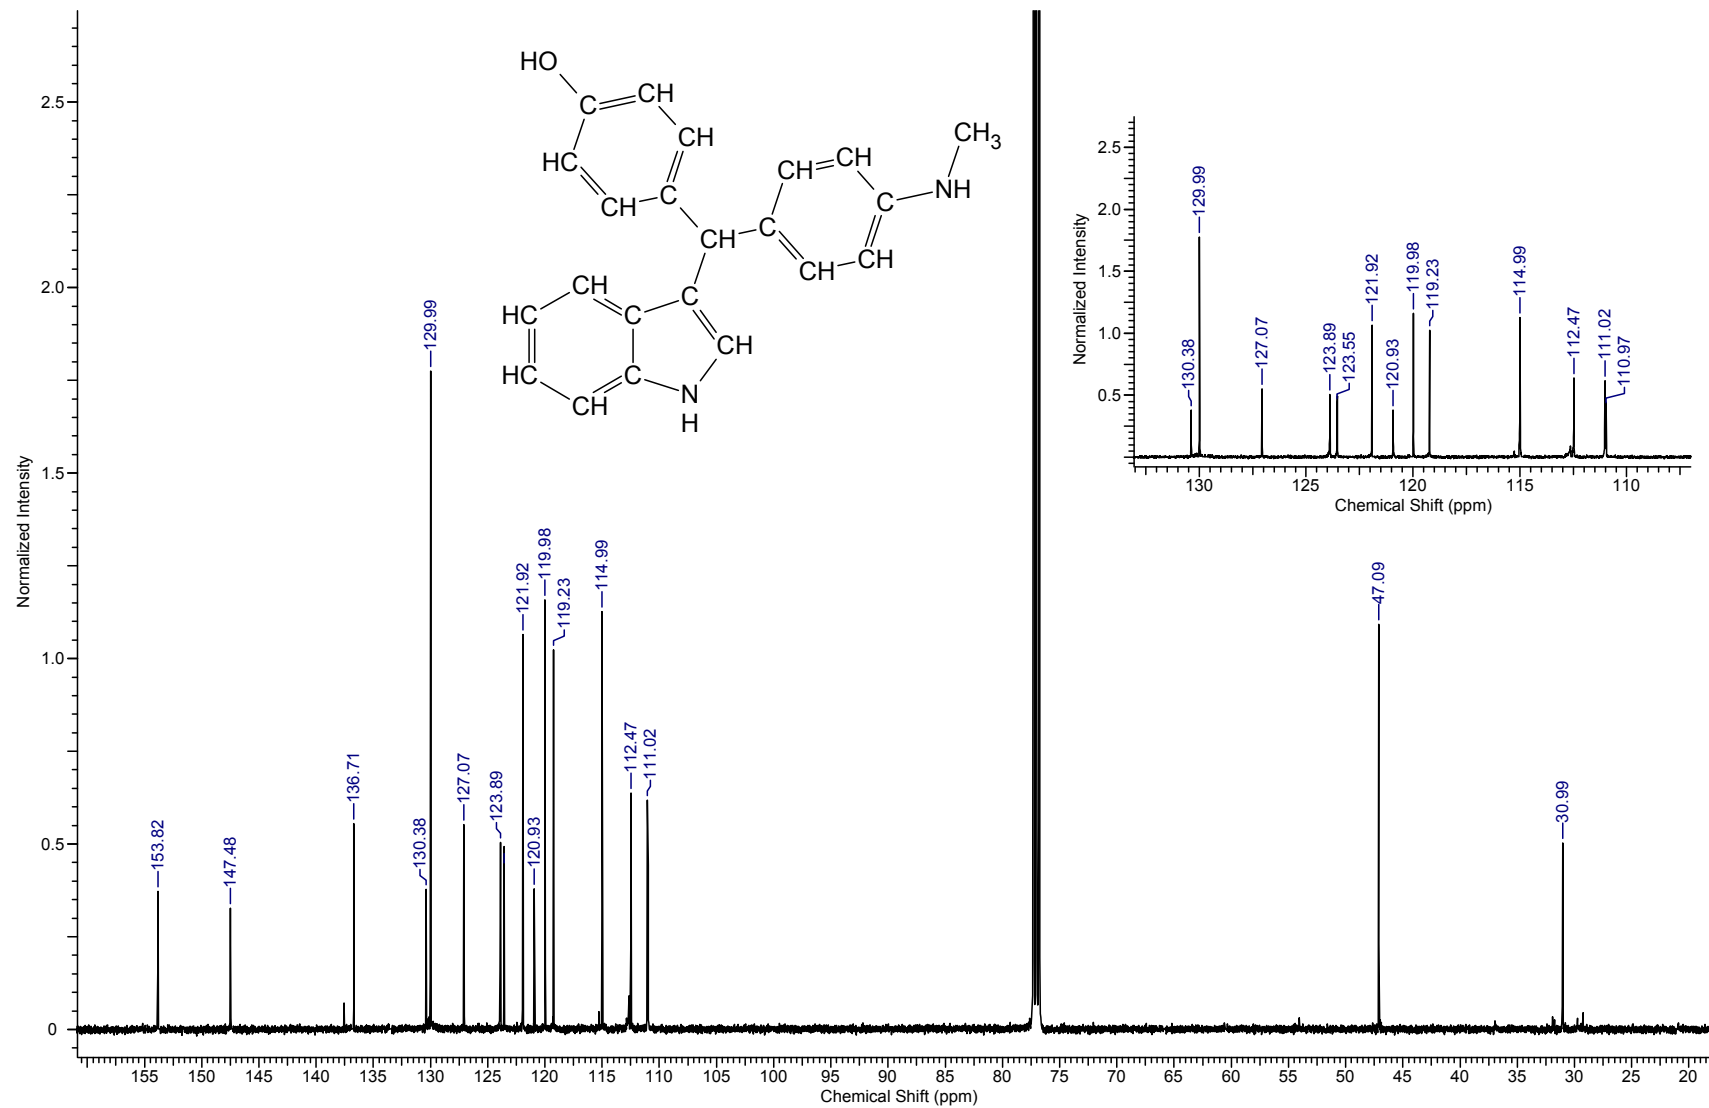

<sup>13</sup>C NMR (126 MHz, CDCl<sub>3</sub>) δ = 153.82, 147.48, 136.71, 130.38, 129.99, 127.07, 123.89, 123.55, 121.92, 120.93, 119.98, 119.23, 114.99, 112.47, 111.02, 110.97, 47.09, 30.99.

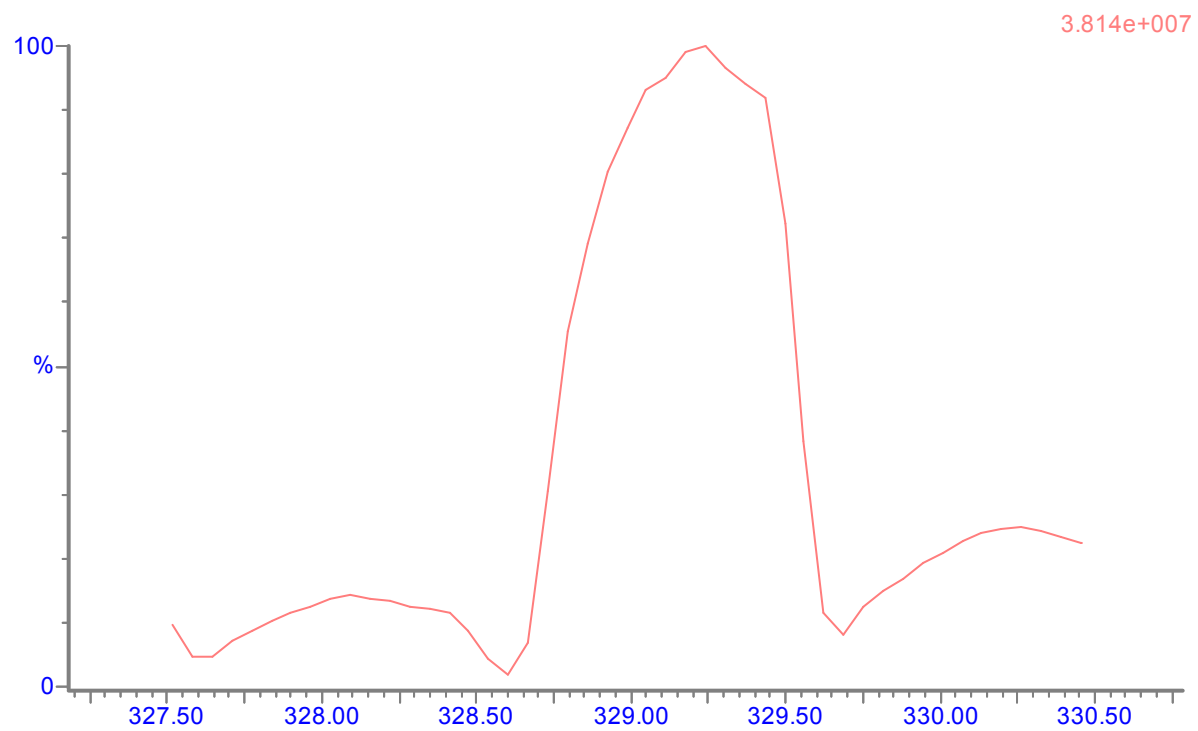

| Formula Mass | Daughter number | Parent m/z | Cone Voltage (V) | Daughters | Collision Energy (eV) | Ion Mode |
|--------------|-----------------|------------|------------------|-----------|-----------------------|----------|
| 328.41       | 1               | 329.16     | 52               | 221.20    | 32                    | ES+      |
|              | 2               | 329.16     | 52               | 212.10    | 24                    | ES+      |
|              | 3               | 329.16     | 52               | 314.14    | 16                    | ES+      |
|              | 4               | 329.16     | 52               | 196.28    | 38                    | ES+      |

**1.13 2-hydroxy-5-nitrobenzaldehyde (1m) + indole (2a) + N-methylaniline (3a): (6m) 4-[1H-indol-3-yl(2-hydroxy-5-nitrophenyl)methyl]-N-methylaniline**

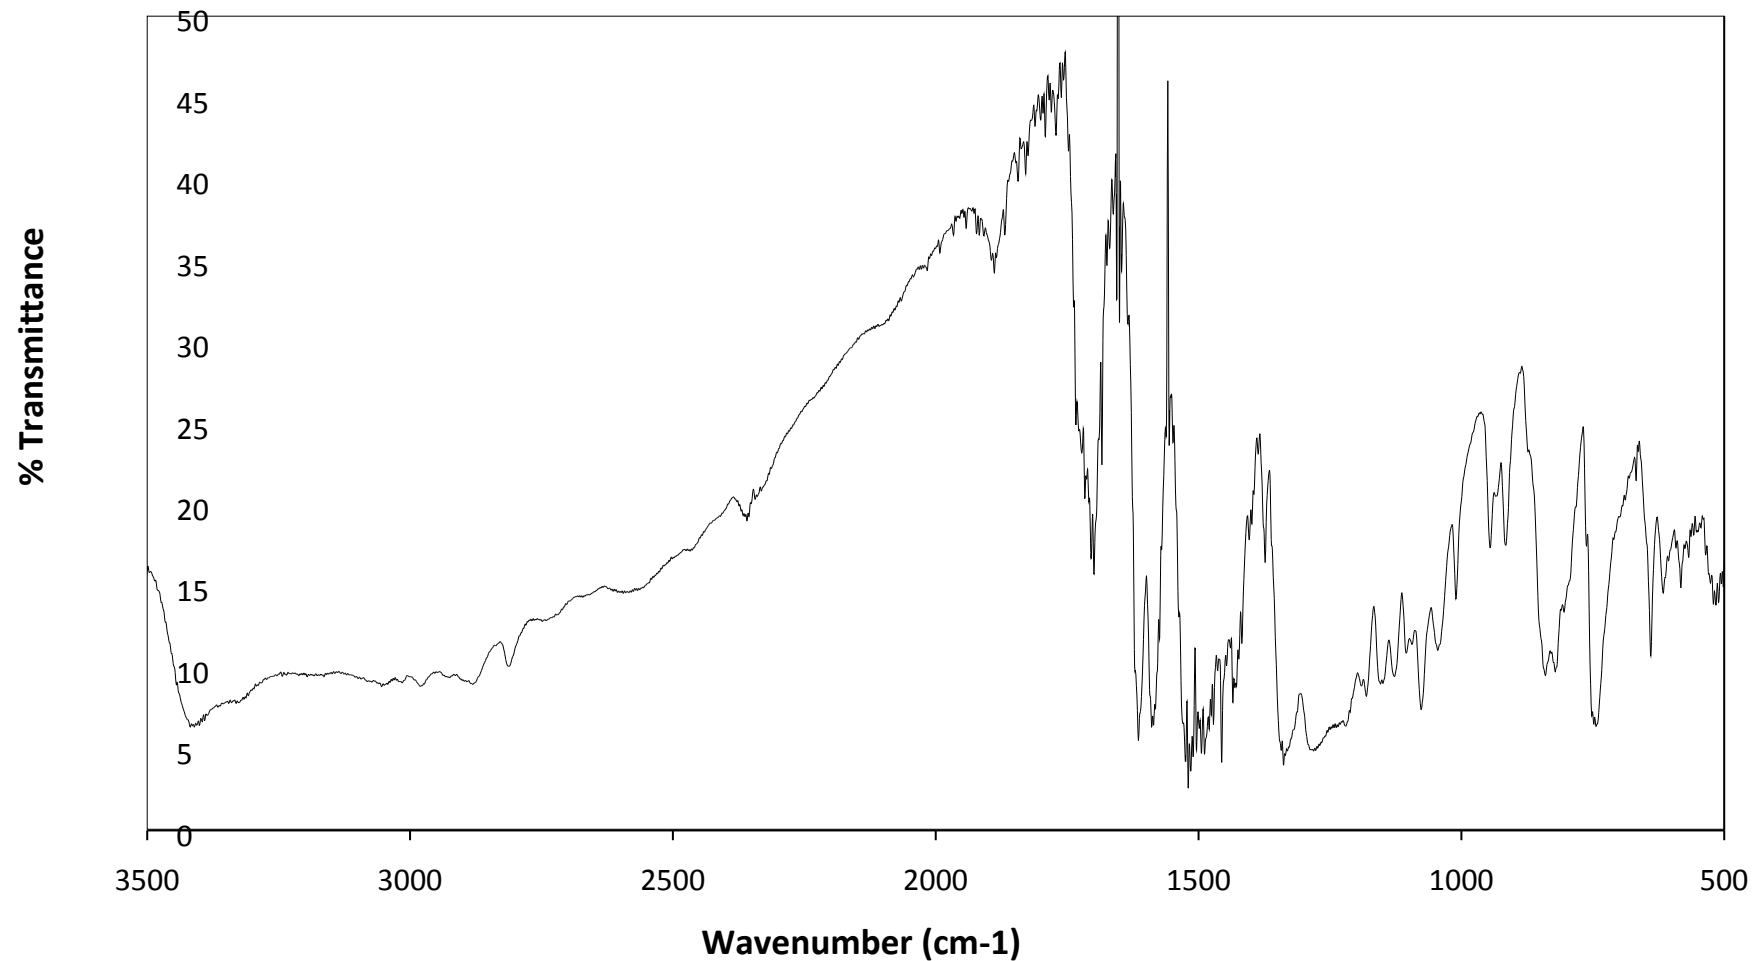

IR (KBr, cm<sup>-1</sup>): 3417 (br, m), 3331 (s), 3053 (s), 3014 (s), 2980 (s), 2924 (s), 2881 (s), 2808 (s), 1699 (m), 1614 (s), 1585 (s), 1519 (s), 1456 (s), 1373 (s), 1338 (s), 1284 (br, s), 1180 (m), 1153 (m), 1126 (m), 1076 (m), 1045 (m), 1010 (m), 945 (w), 916 (w), 840 (s), 821 (s), 744 (s), 640 (m).

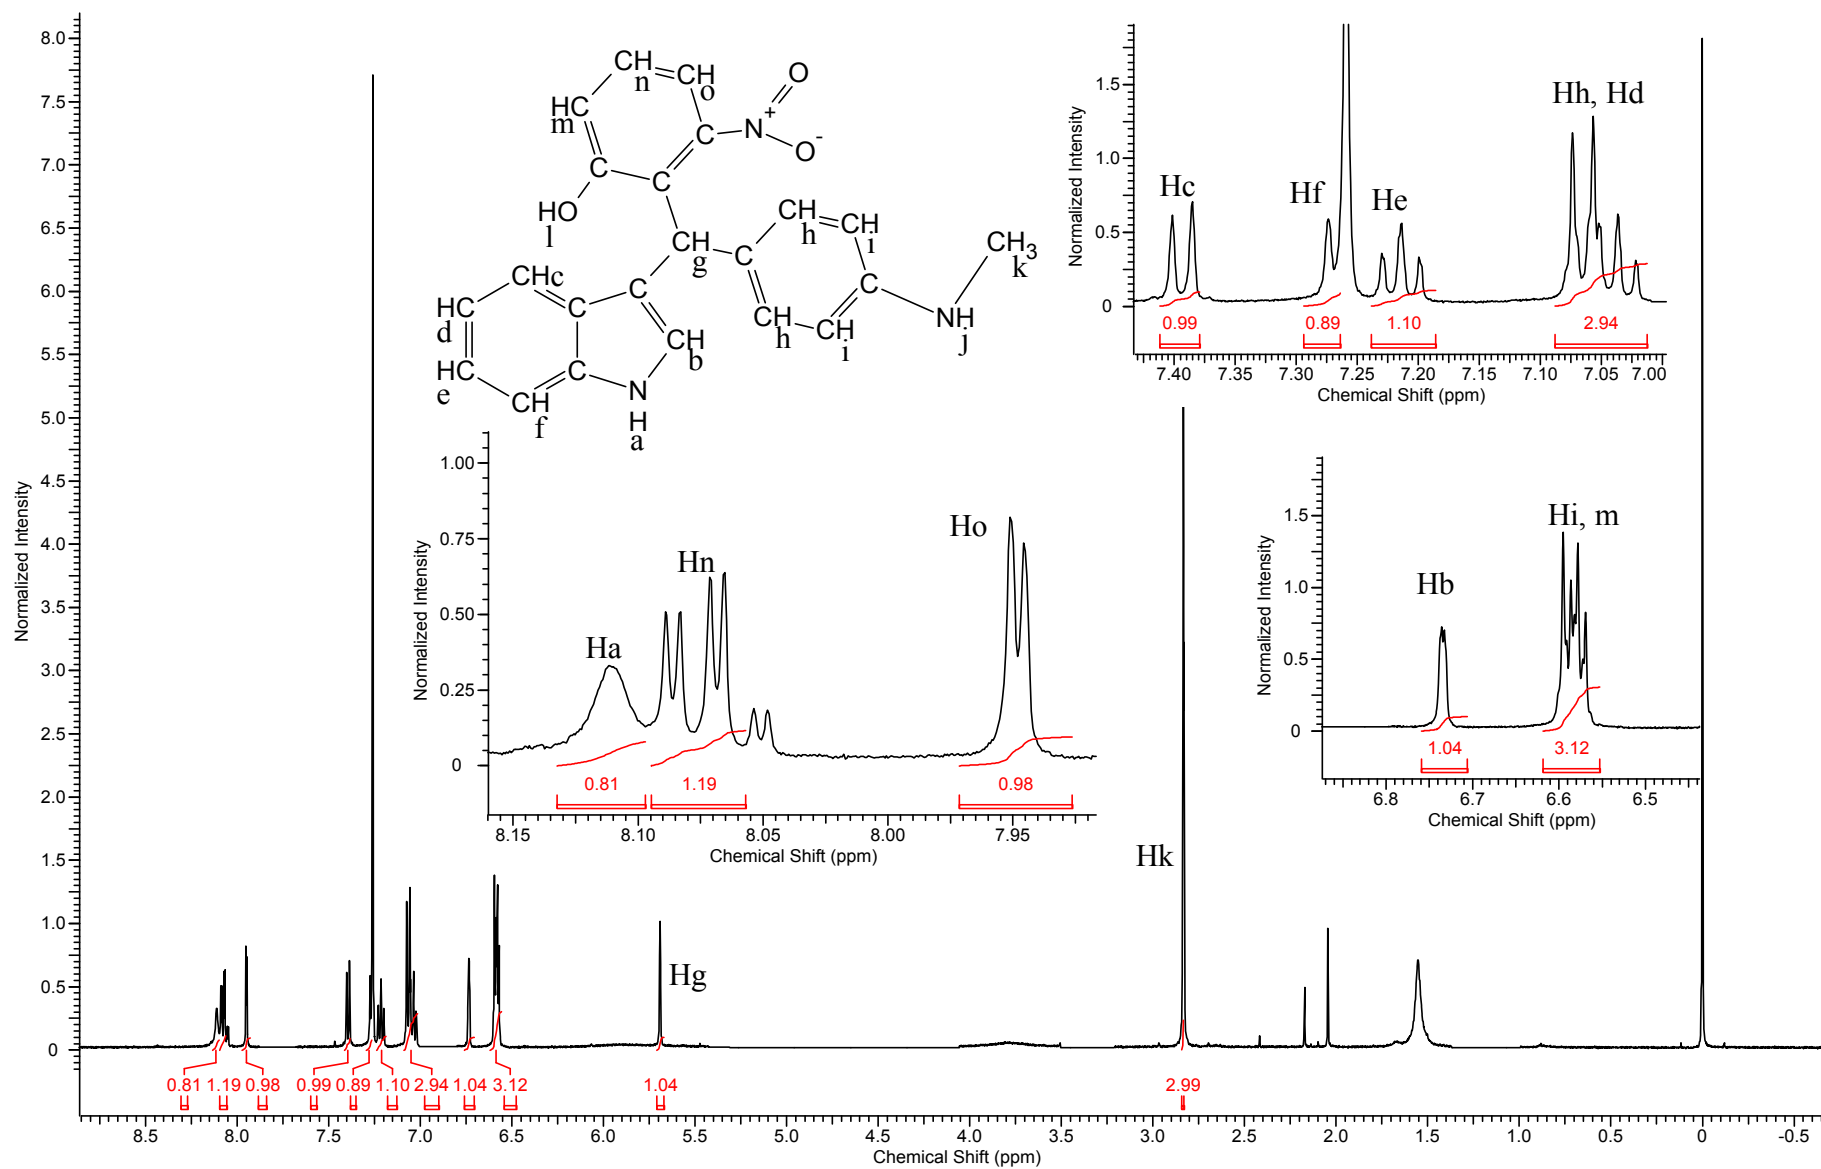

<sup>1</sup>H NMR (500MHz, CDCl<sub>3</sub>) δ = 8.11 (br s, 1 H), 8.08 (dd, *J* = 3.1, 8.9 Hz, 1 H), 7.95 (d, *J* = 2.7 Hz, 1 H), 7.39 (d, *J* = 8.2 Hz, 1 H), 7.27 (d, *J* = 7.9 Hz, 1 H), 7.21 (t, *J* = 7.2 Hz, 1 H), 7.09 - 7.01 (m, 3 H), 6.73 (d, *J* = 1.5 Hz, 1 H), 6.62 - 6.55 (m, 3 H), 5.69 (s, 1 H), 2.83 (s, 3 H).

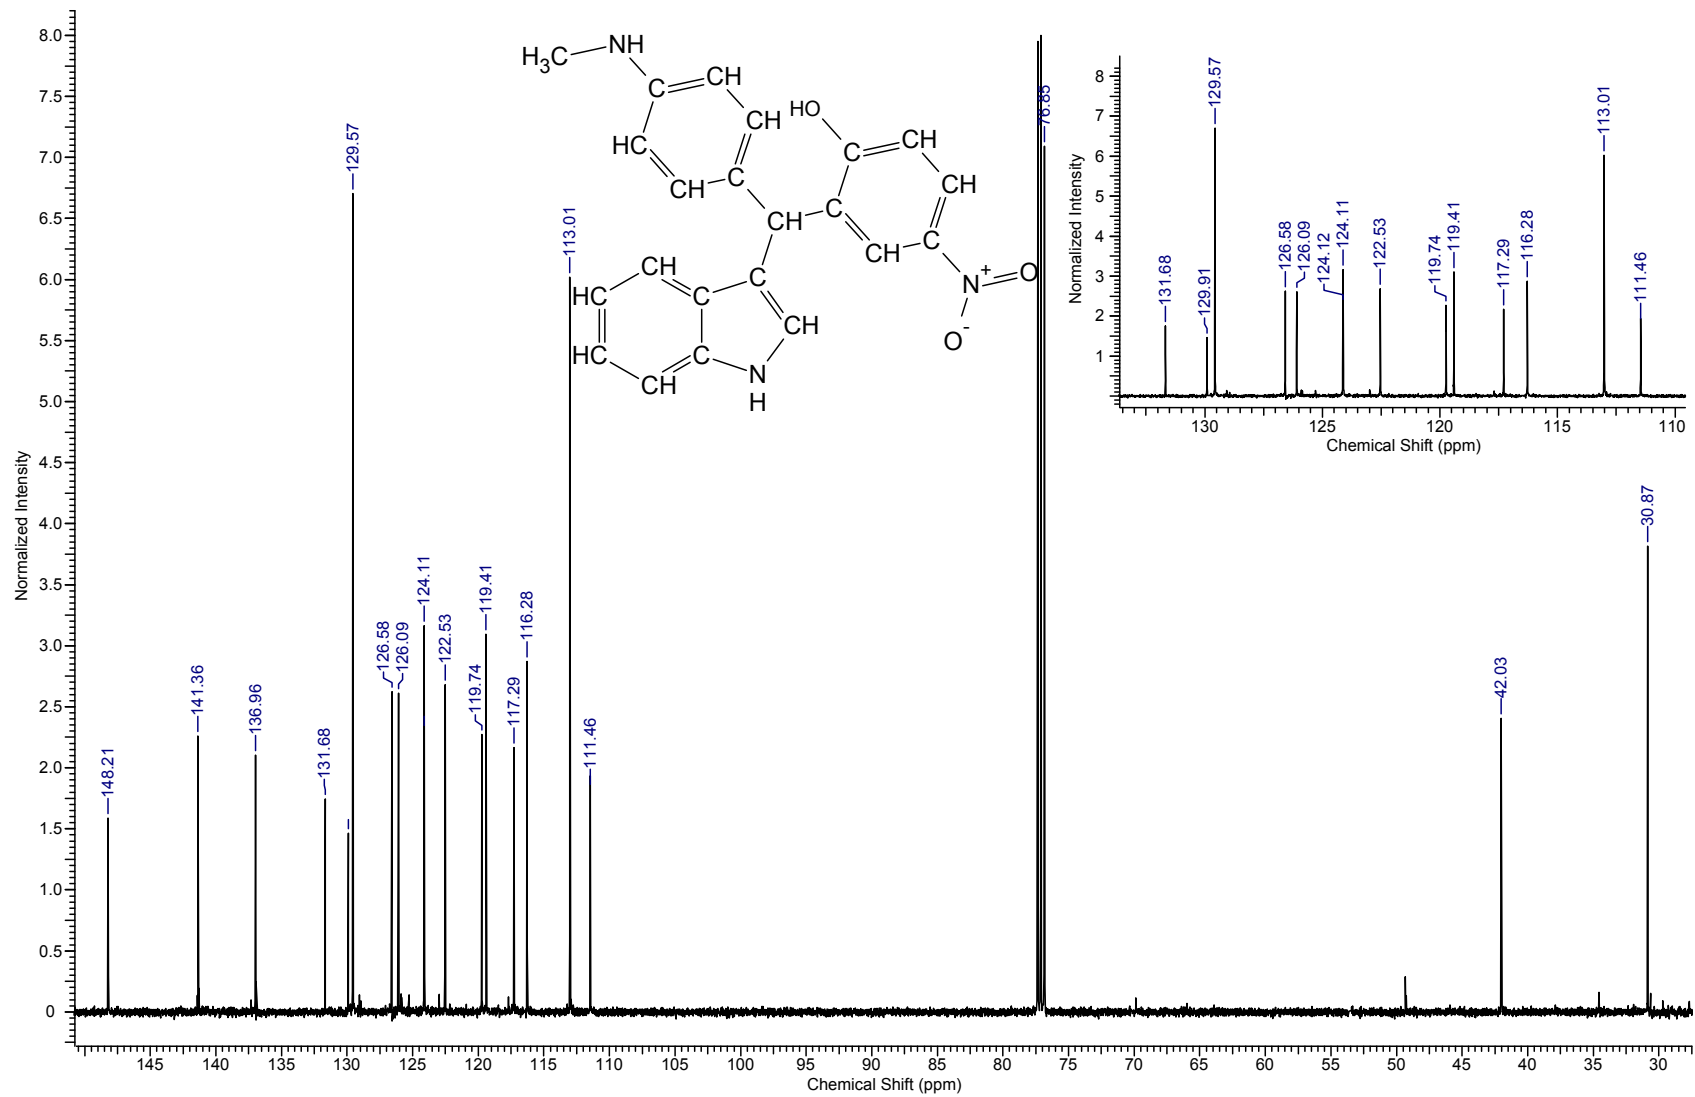

<sup>13</sup>C NMR (126 MHz, CDCl<sub>3</sub>) δ = 148.21, 141.36, 136.96, 131.68, 129.91, 129.57, 126.58, 126.09, 124.12, 124.11, 122.53, 119.74, 119.41, 117.29, 116.28, 113.01, 111.46, 76.85, 42.03, 30.87.

The mass spectrum of this compound was obtained using a direct probe. The following peaks were observed:

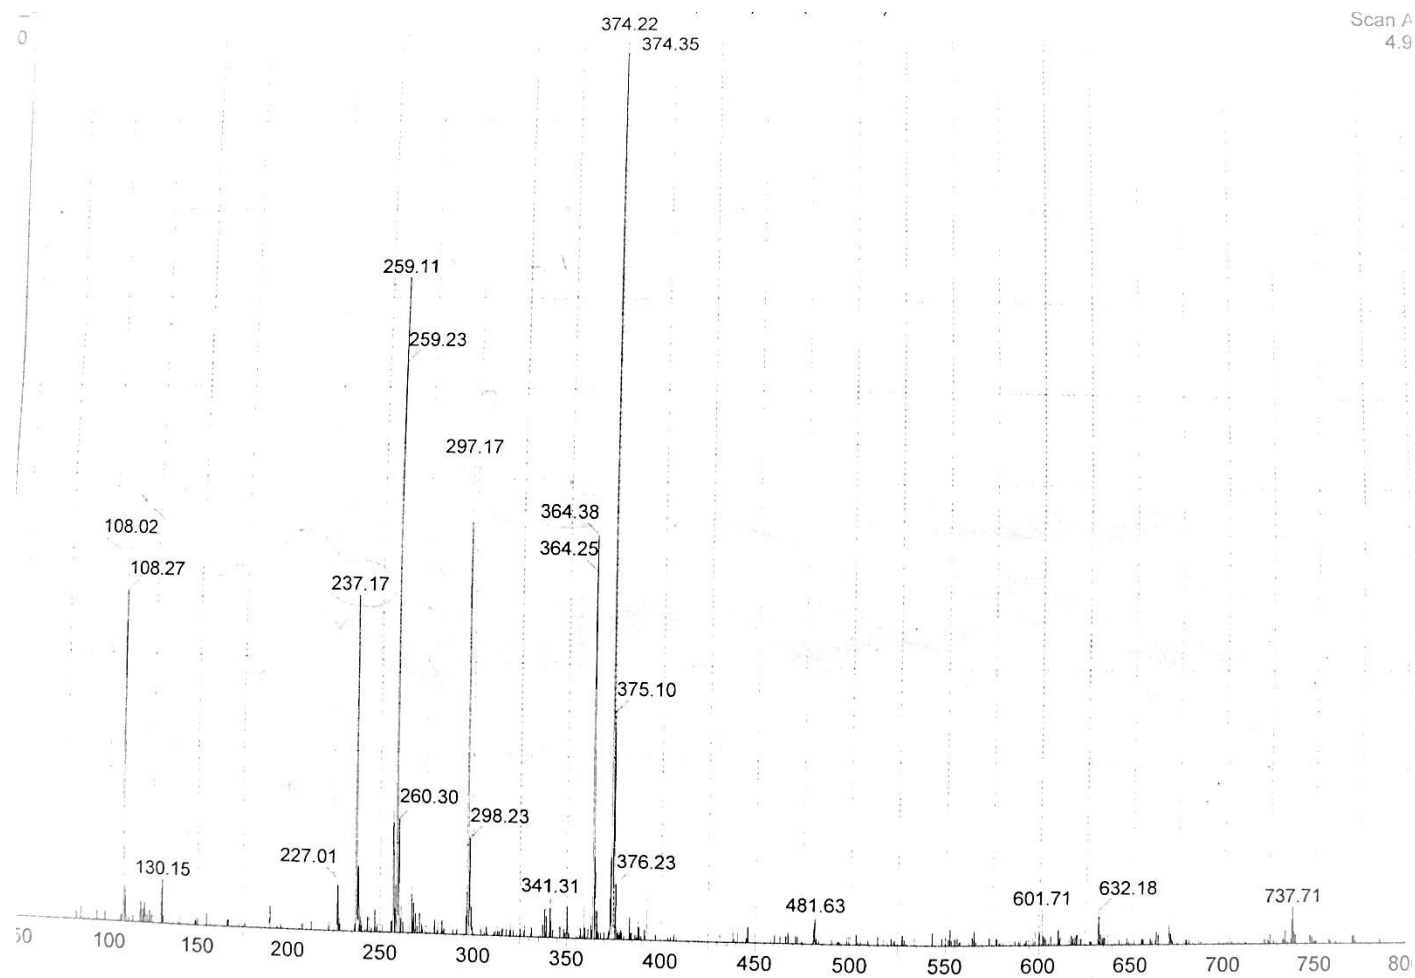

**1.14 4-bromobenzaldehyde (1n) + indole (2a) + N-Methylaniline (3a): (6n) 4-[1H-indol-3-yl(4-bromophenyl)methyl]-N-methylaniline**

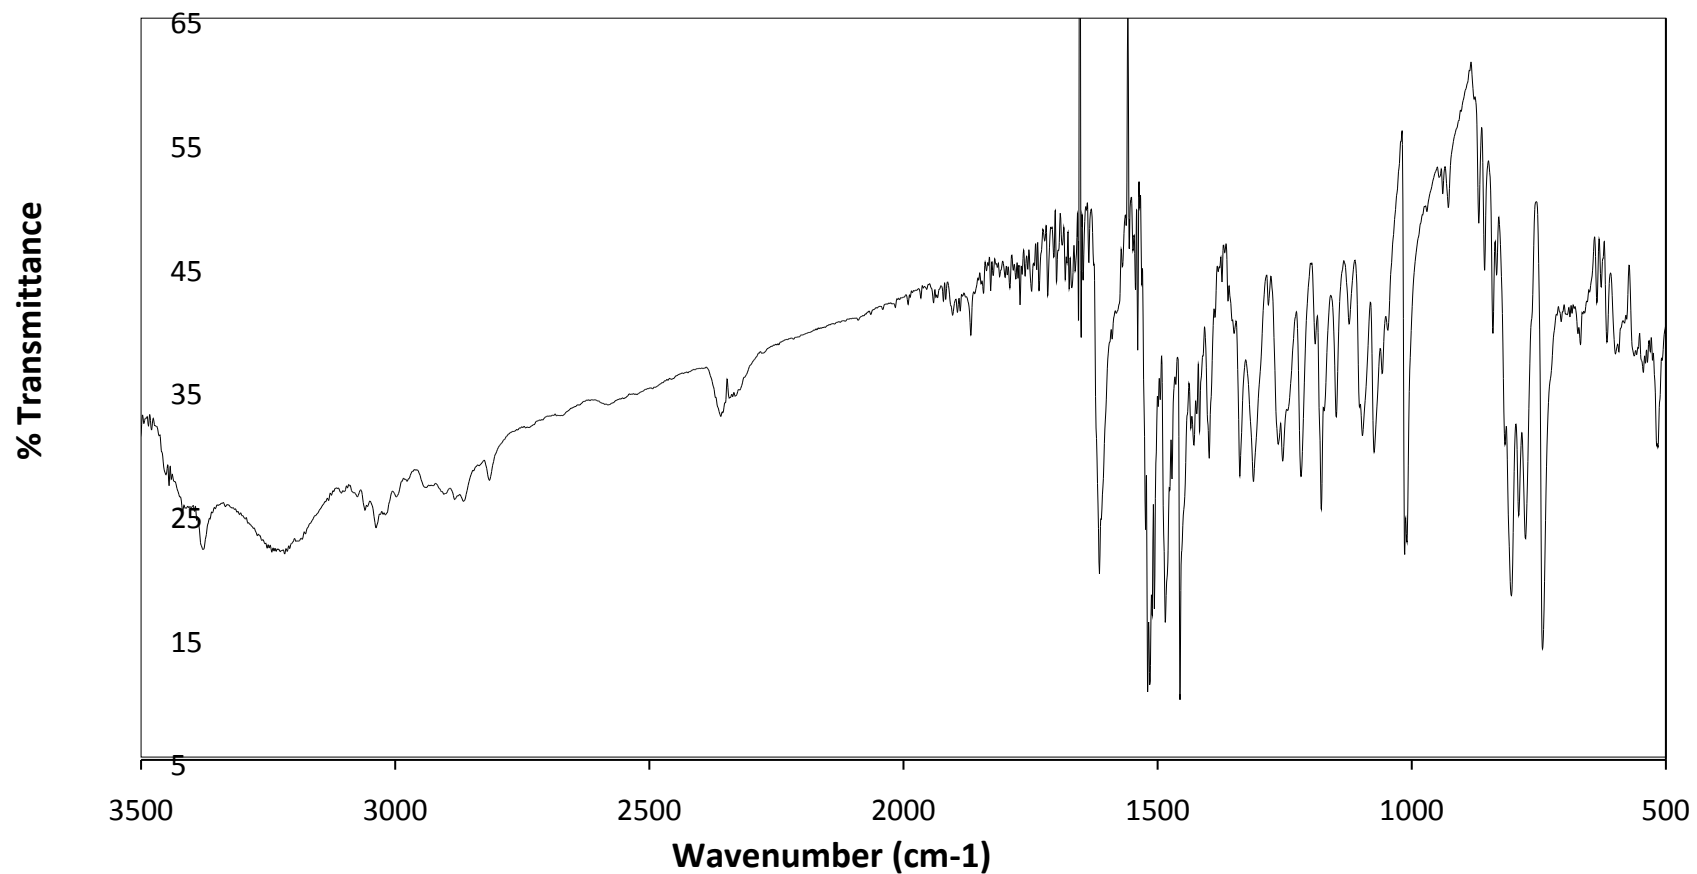

IR (KBr,  $\text{cm}^{-1}$ ): 3416 (w), 3379 (m), 3226 (br, m), 3099 (m), 3074 (m), 3059 (m), 3037 (m), 3018 (m), 2997 (m), 2985 (m), 2937 (m), 2899 (m), 2883 (m), 2866 (m), 2814 (m), 1614 (m), 1519 (s), 1485 (s), 1456 (s), 1398 (w), 1338 (m), 1311 (m), 1263 (m), 1253 (m), 1217 (m), 1178 (m), 1147 (m), 1097 (m), 1074 (m), 1014 (s), 840 (w), 804 (s), 788 (s), 775 (s), 742 (s).

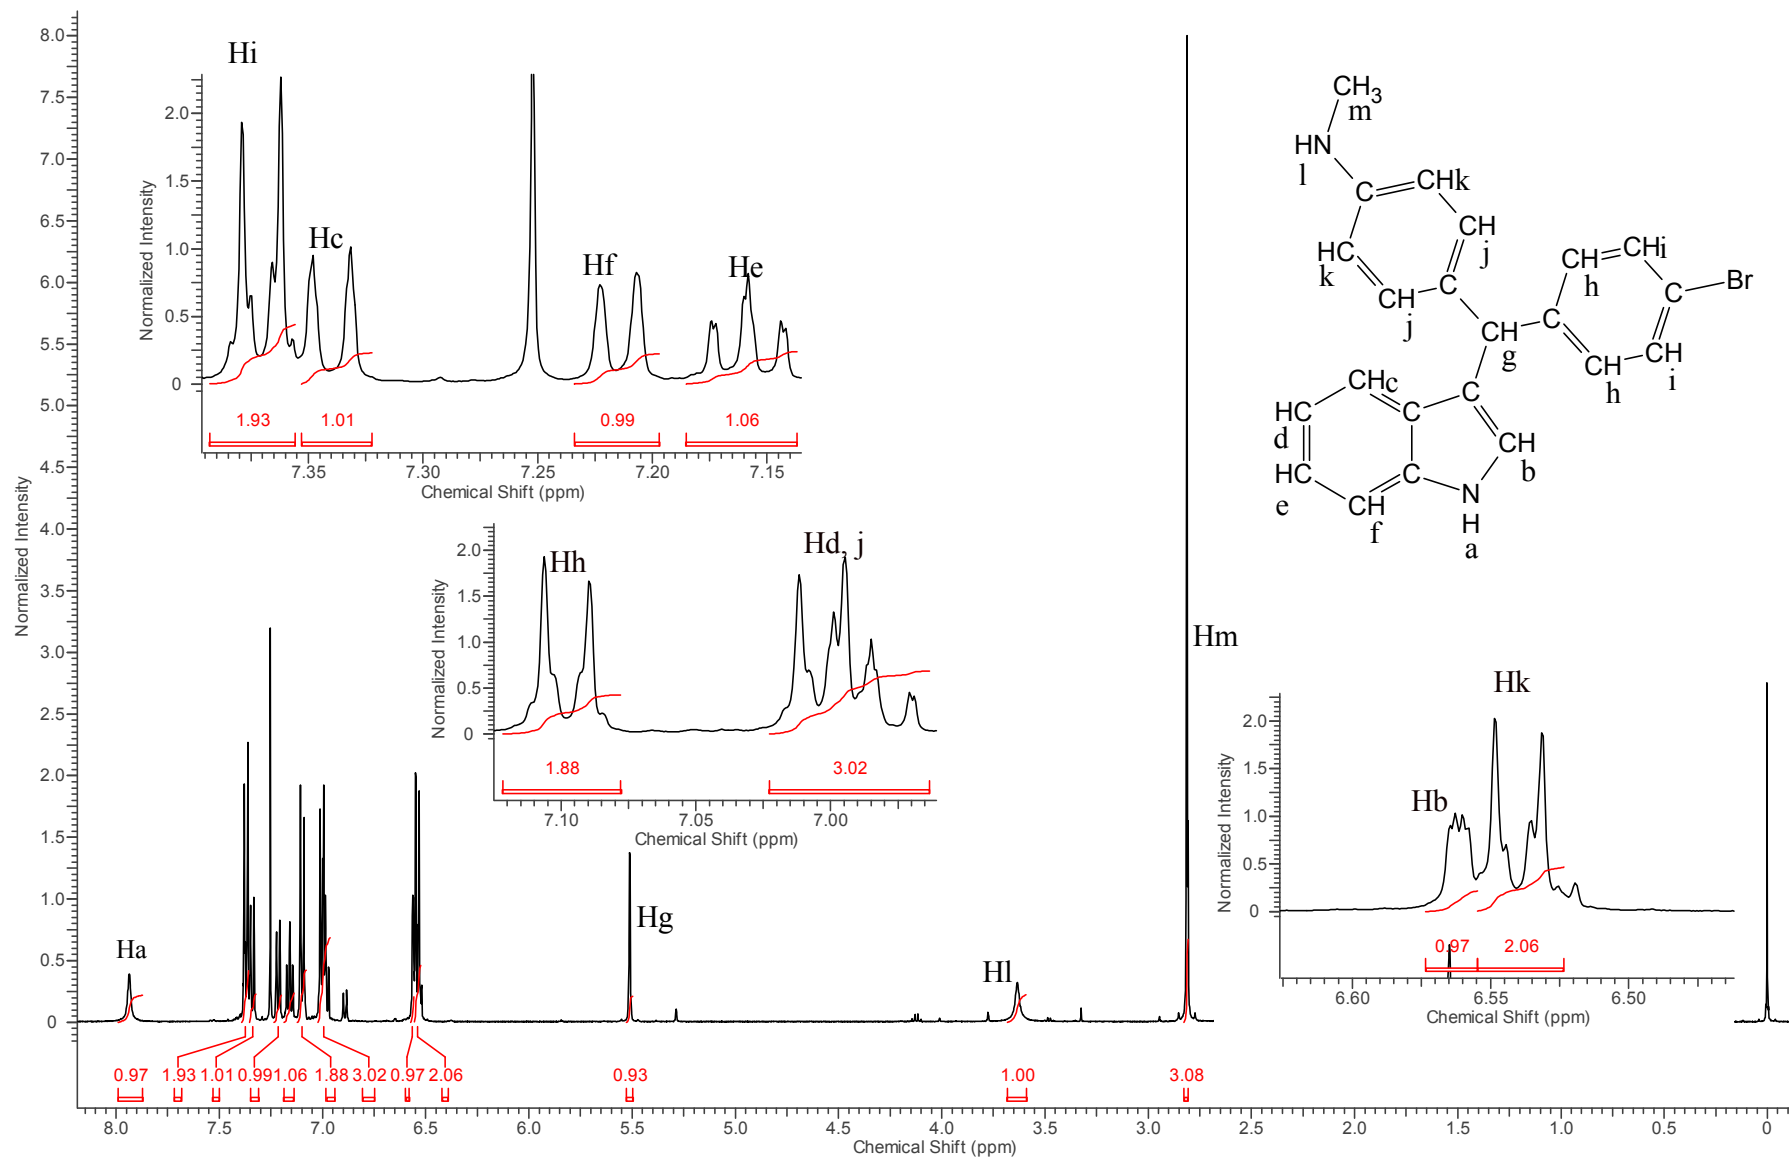

<sup>1</sup>H NMR (500MHz, CDCl<sub>3</sub>) δ = 7.94 (br s, 1 H), 7.37 (d, J = 8.5 Hz, 2 H), 7.34 (d, J = 8.2 Hz, 1 H), 7.21 (d, J = 7.9 Hz, 1 H), 7.16 (ddd, J = 1.1, 7.0, 7.9 Hz, 1 H), 7.10 (d, J = 8.2 Hz, 2 H), 7.02 - 6.96 (m, 3 H), 6.56 (dd, J = 1.1, 2.3 Hz, 1 H), 6.54 (d, J = 8.5 Hz, 2 H), 5.51 (s, 1 H), 3.63 (br s, 1 H), 2.81 (s, 3 H).



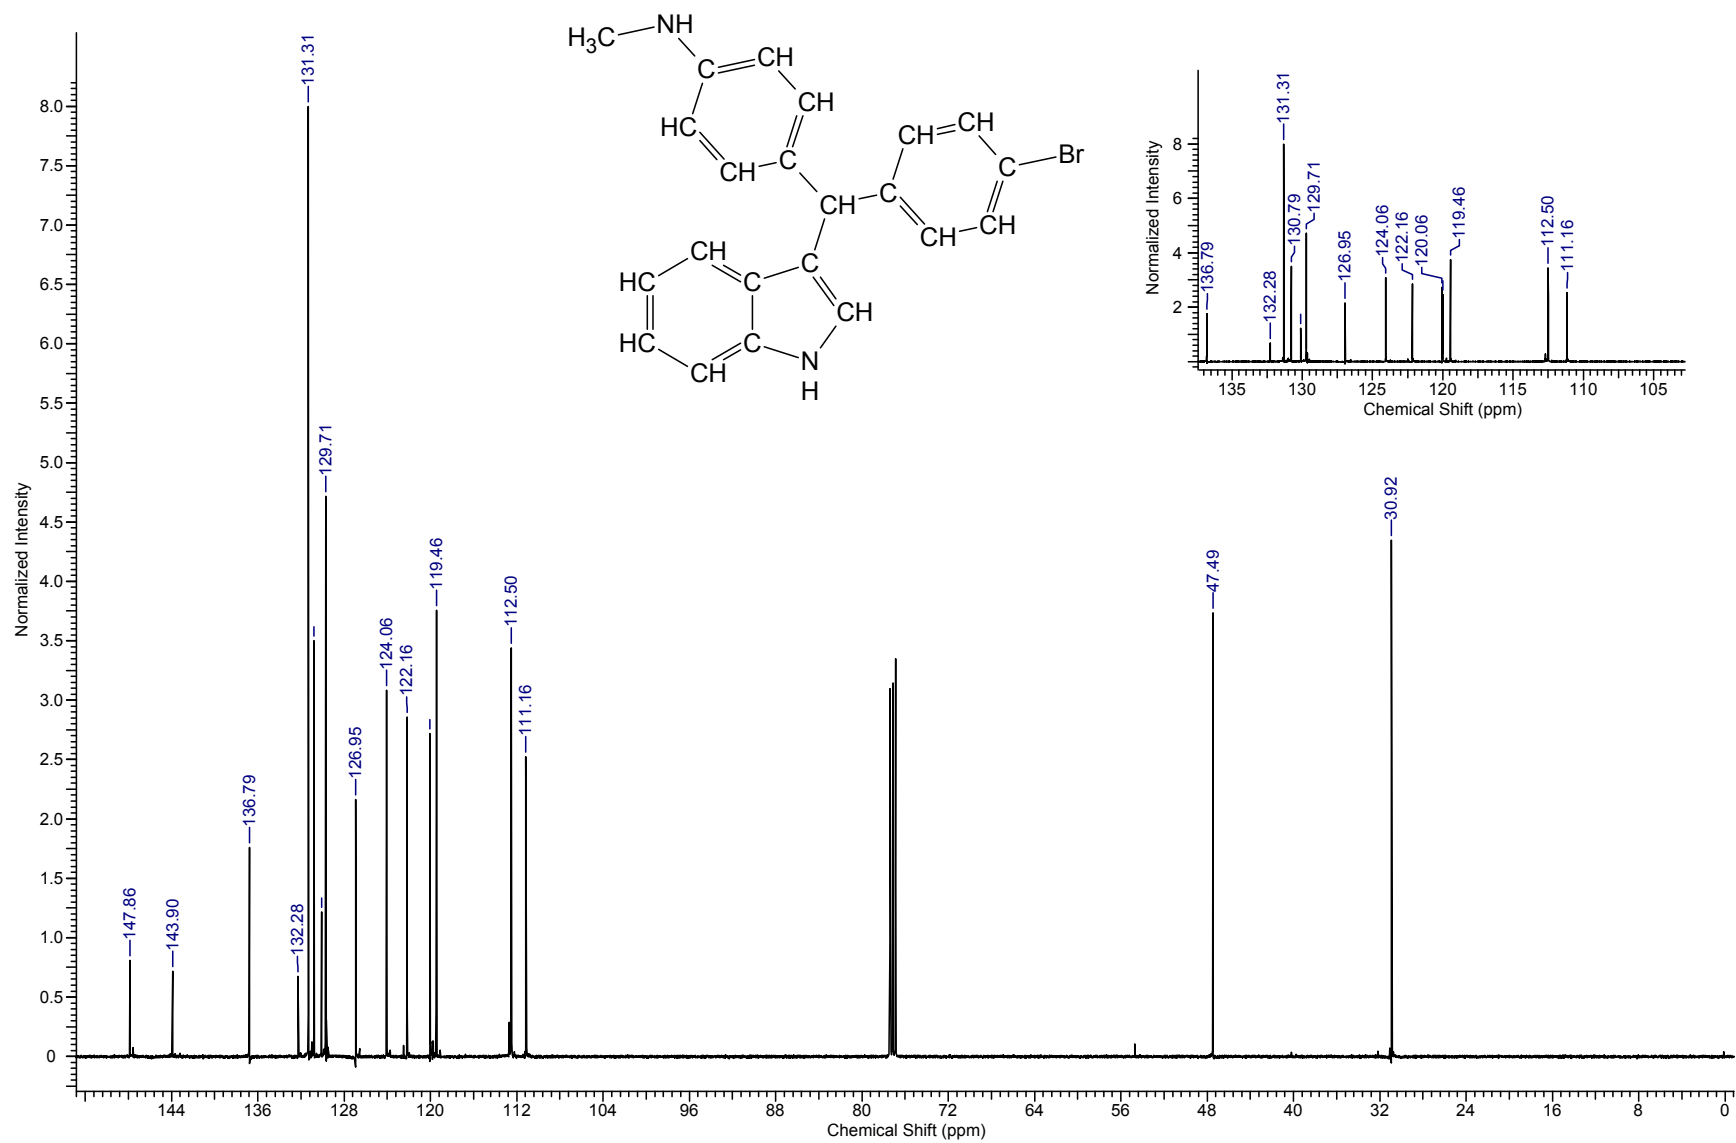

<sup>13</sup>C NMR (126 MHz, CDCl<sub>3</sub>) δ = 147.86, 143.90, 136.79, 132.28, 131.31, 130.79, 130.09, 129.71, 126.95, 124.06, 122.16, 120.06, 120.00, 119.46, 112.50, 111.16, 47.49, 30.92.

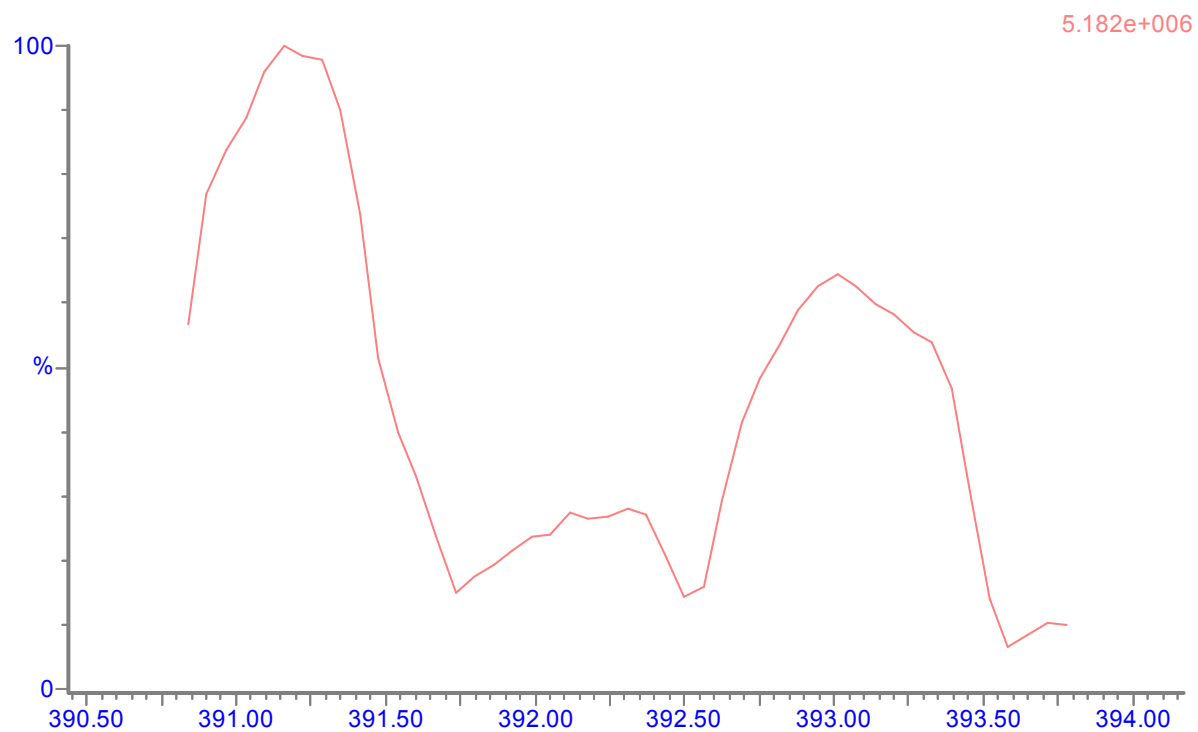

| Formula Mass | Daughter number | Parent m/z | Cone Voltage (V) | Daughters | Collision Energy (eV) | Ion Mode |
|--------------|-----------------|------------|------------------|-----------|-----------------------|----------|
| 391.32       | 1               | 393.05     | 36               | 221.12    | 46                    | ES+      |
|              | 2               | 393.05     | 36               | 377.99    | 22                    | ES+      |
|              | 3               | 393.05     | 36               | 285.96    | 26                    | ES+      |
|              | 4               | 393.05     | 36               | 204.02    | 66                    | ES+      |
|              | 5               | 393.05     | 36               | 276.08    | 20                    | ES+      |

**1.15 3,4-dichlorobenzaldehyde (1o) + indole (2a) + N-methylaniline (3a): (6o) 4-[1H-indol-3-yl(3,4-dichlorophenyl)methyl]-N-methylaniline**

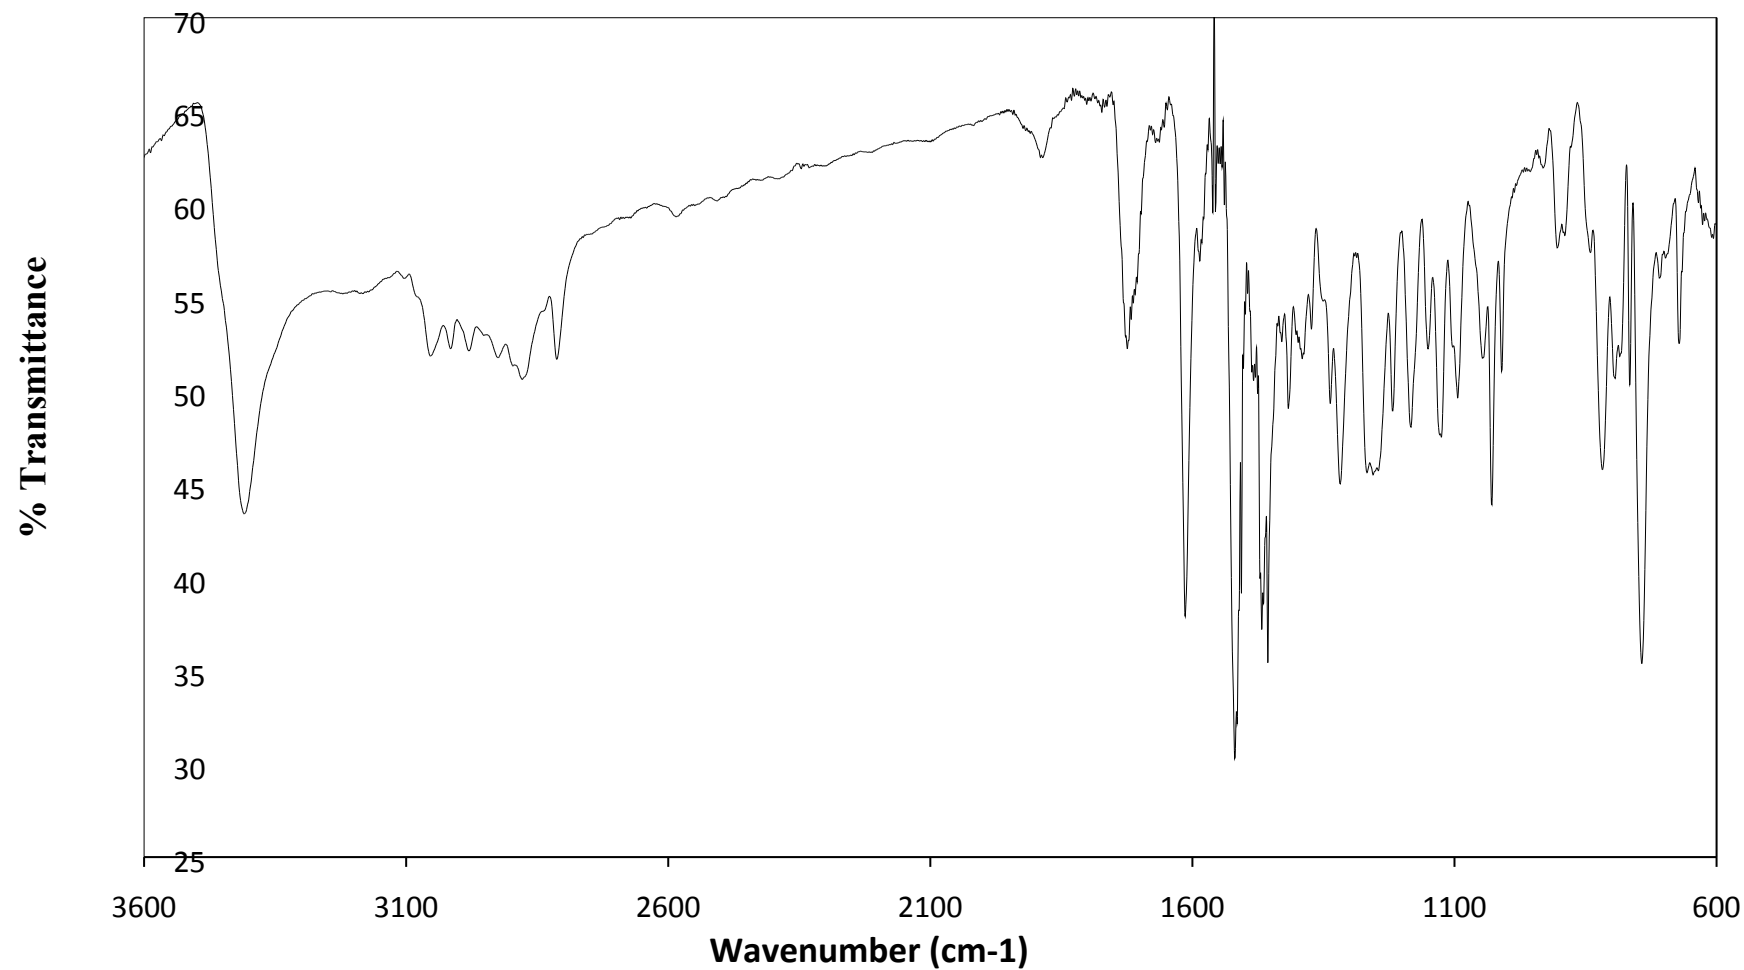

IR (KBr,  $\text{cm}^{-1}$ ): 3410 (br, m), 3053 (w), 3014 (w), 2978 (w), 2927 (w), 2877 (w), 2812 (w), 1724 (w), 1612 (s), 1519 (s), 1467 (s), 1456 (s), 1444 (w), 1336 (w), 1317 (m), 1255 (m), 1217 (w), 1182 (w), 1149 (w), 1124 (w), 1093 (w), 1045 (w), 1028 (m), 1024 (w), 904 (w), 889 (w), 842 (w), 817 (m), 742 (s).

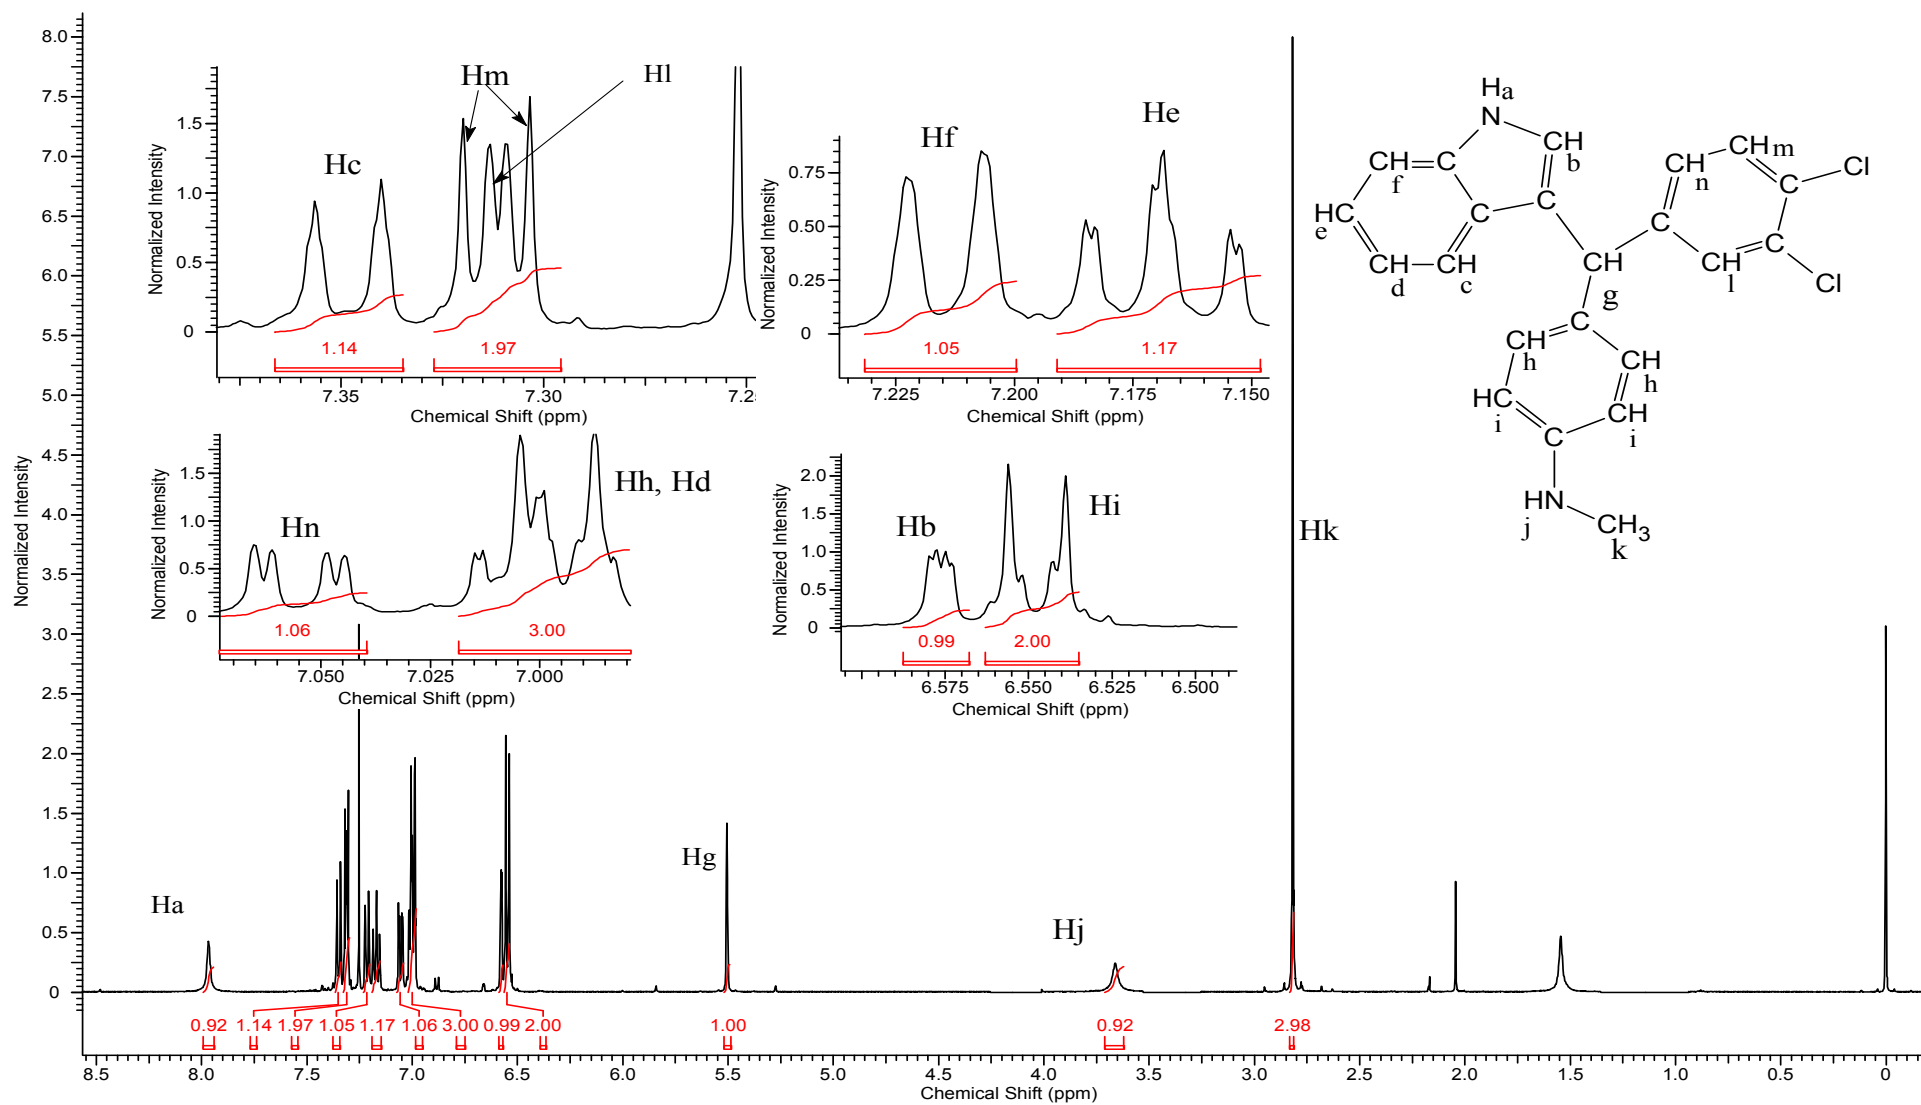

<sup>1</sup>H NMR (500 MHz, CDCl<sub>3</sub>) δ = 7.97 (br s, 1 H), 7.38 (d, *J* = 8.2 Hz, 1 H), 7.31 (d, *J* = 8.2 Hz, 1 H), 7.31 (d, *J* = 1.8 Hz, 1H) 7.21 (d, *J* = 7.9 Hz, 1 H), 7.17 (ddd, *J* = 0.9, 7.0, 7.9 Hz, 1 H), 7.06 (dd, *J* = 1.8 Hz, 8.2 Hz, 1 H), 7.06 - 7.01 (m, 3 H), 6.61 (dd, *J* = 0.9, 2.4 Hz, 1 H), 6.55 (d, *J* = 8.5 Hz, 2 H), 5.54 (s, 1 H), 3.66 (br s 1H), 2.82 (s, 3 H).

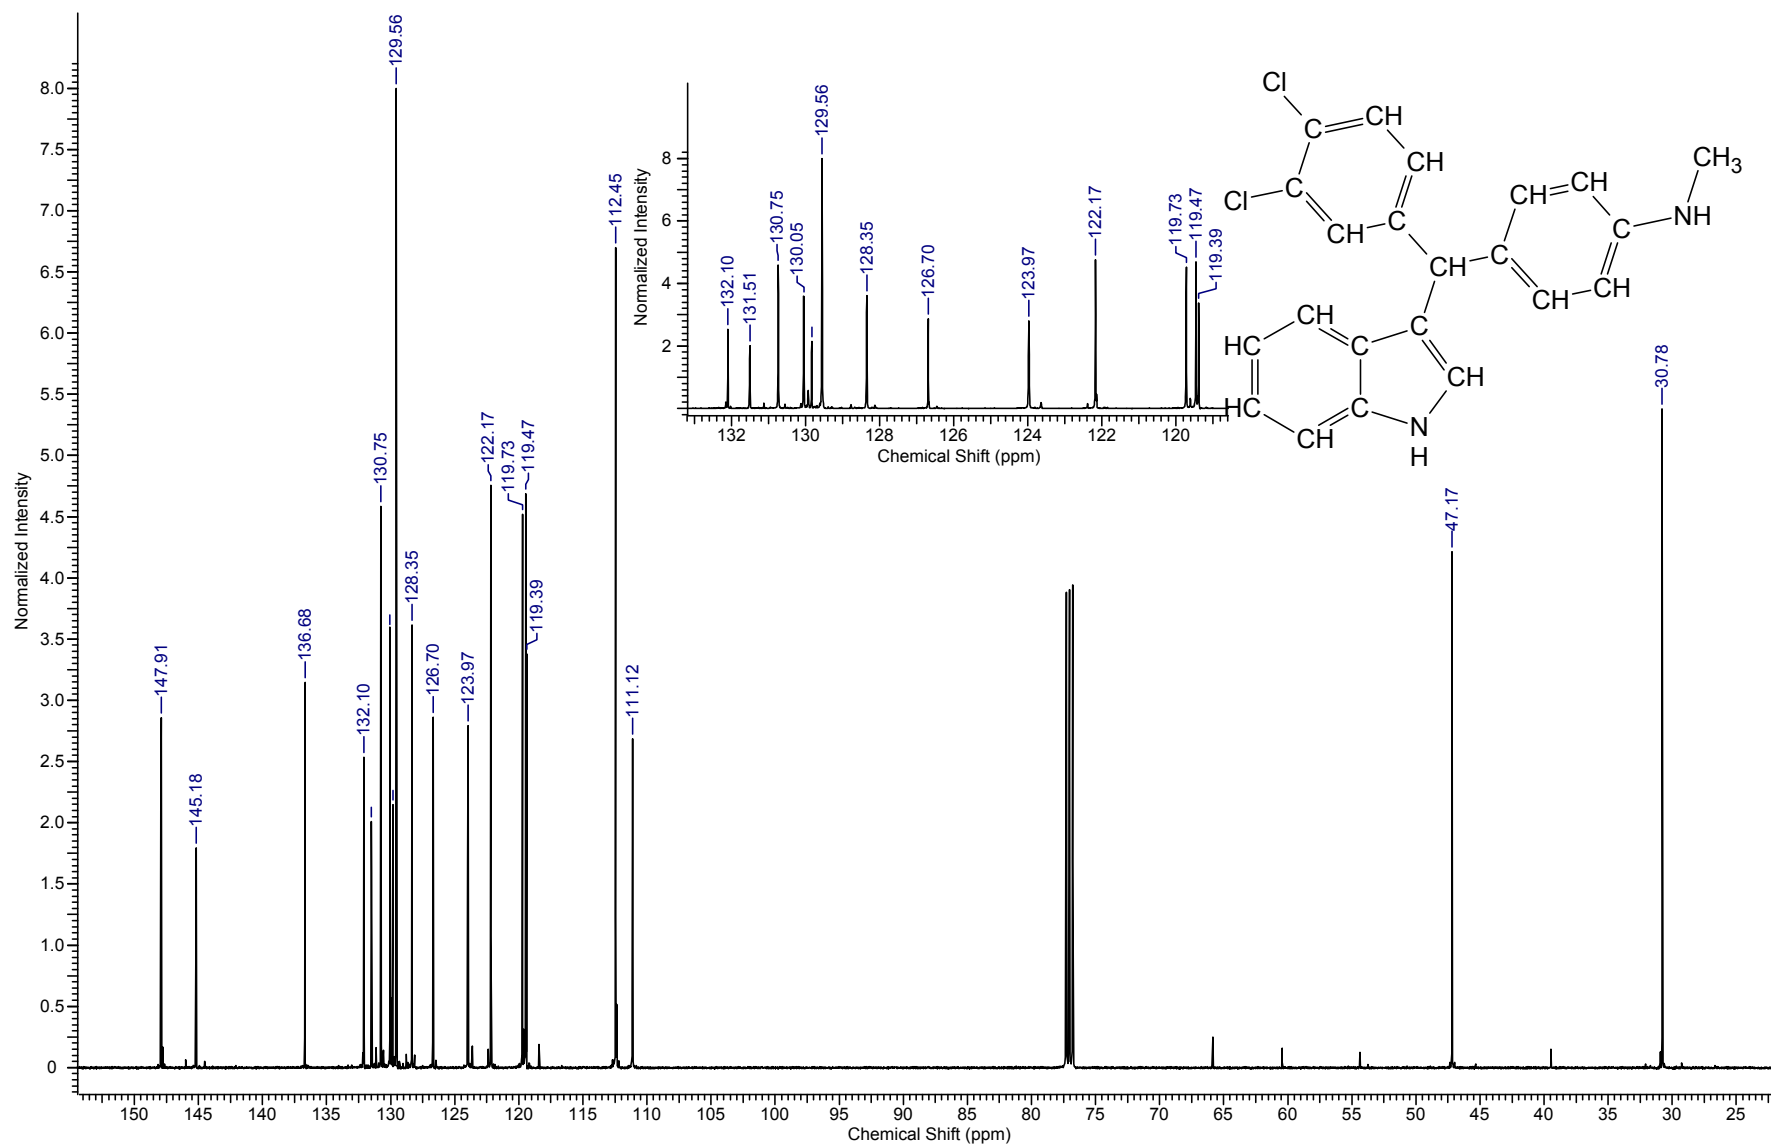

$^{13}\text{C}$  NMR (126 MHz,  $\text{CDCl}_3$ )  $\delta$  = 147.91, 145.18, 136.68, 132.10, 131.51, 130.75, 130.05, 129.84, 129.56, 128.35, 126.70, 123.97, 122.17, 119.73, 119.47, 119.39, 112.45, 111.12, 47.17, 30.78.

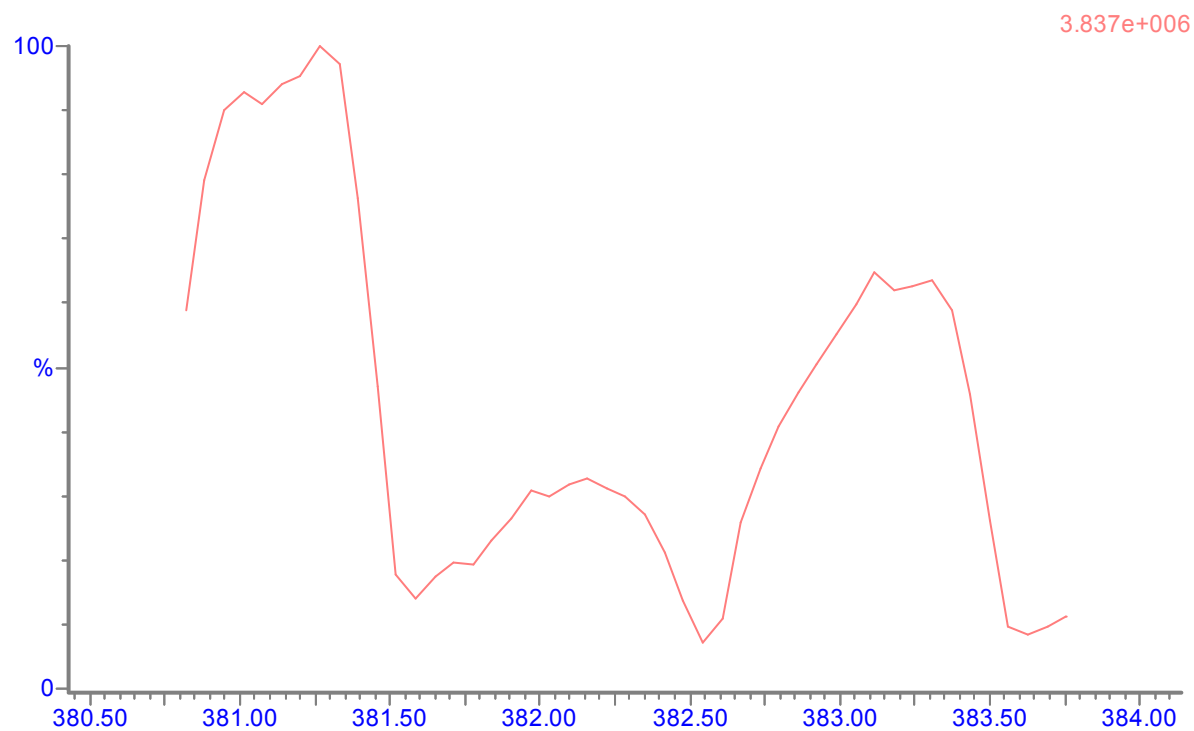

| Formula Mass | Daughter number | Parent m/z | Cone Voltage (V) | Daughters | Collision Energy (eV) | Ion Mode |
|--------------|-----------------|------------|------------------|-----------|-----------------------|----------|
| 381.30       | 1               | 383.10     | 44               | 221.12    | 34                    | ES+      |
|              | 2               | 383.10     | 44               | 368.03    | 24                    | ES+      |
|              | 3               | 383.10     | 44               | 266.07    | 24                    | ES+      |
|              | 4               | 383.10     | 44               | 276.01    | 22                    | ES+      |
|              | 5               | 383.10     | 44               | 203.96    | 74                    | ES+      |

**1.16 2,4-dichlorobenzaldehyde (1p) + indole (2a) + N-methylaniline (3a): (6p) 4-[1*H*-indol-3-yl(2,4-dichlorophenyl)methyl]-*N*-methylaniline**

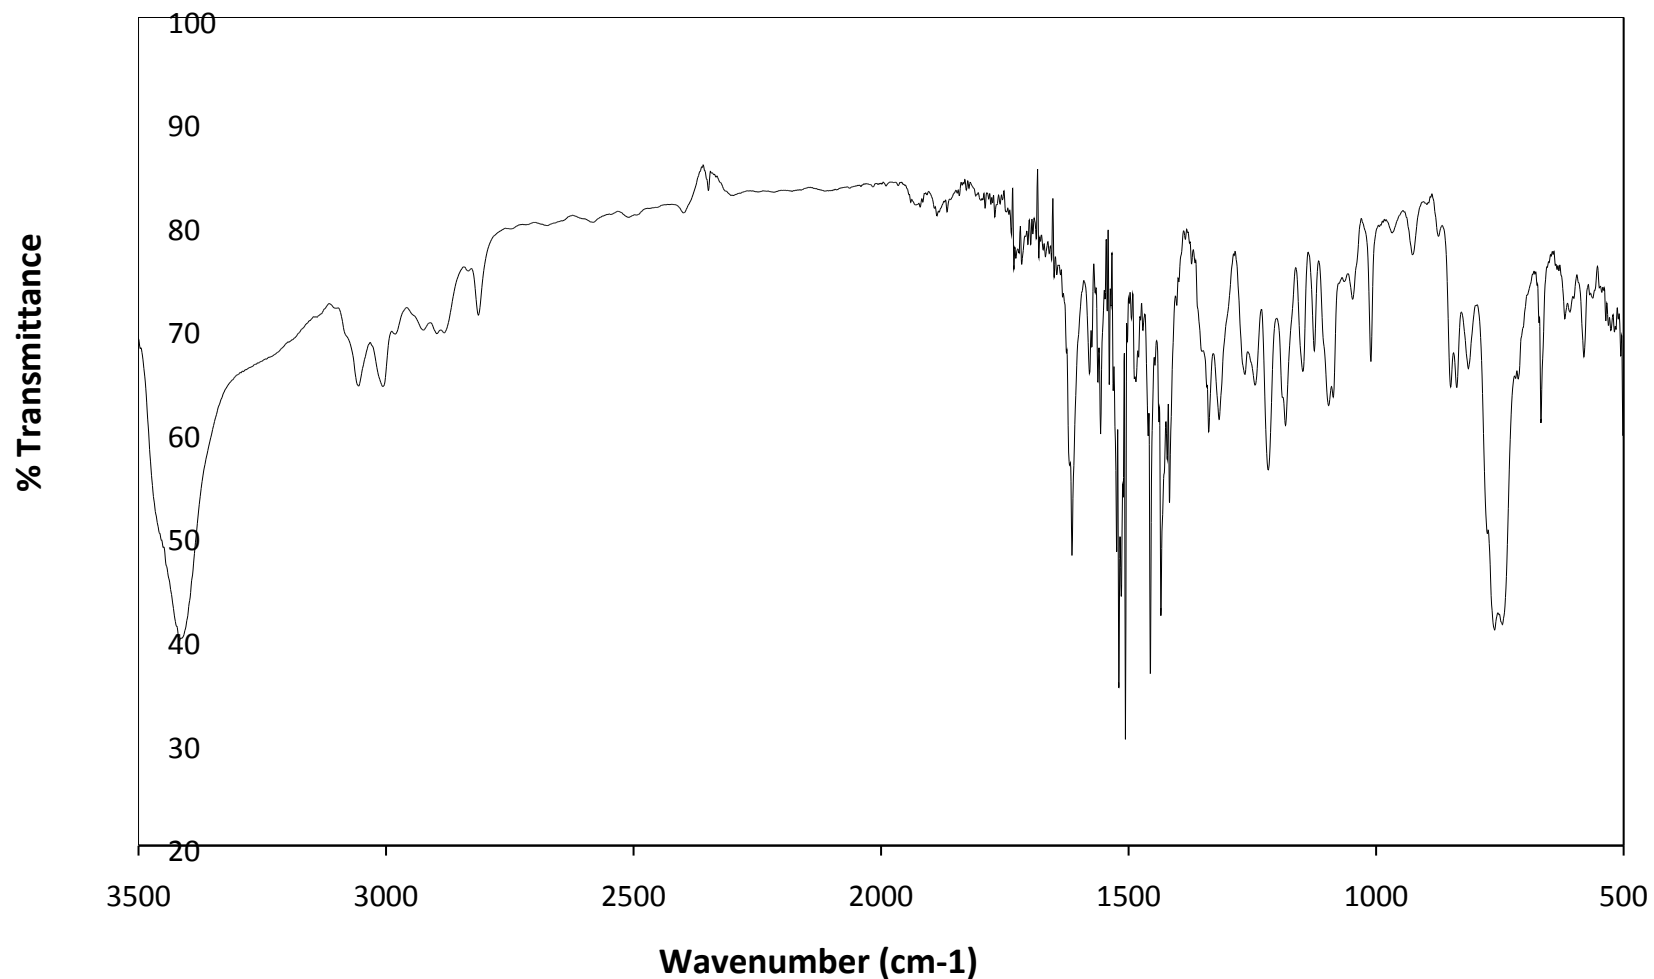

IR (KBr,  $\text{cm}^{-1}$ ): 3417 (br, s), 3057 (w), 3005 (w), 2924 (w), 2897 (w), 2883 (w), 2814 (w), 1614 (m), 1556 (w), 1519 (s), 1506 (s), 1456 (s), 1435 (s), 1417 (m), 1338 (w), 1317 (w), 1265 (w), 1244 (w), 1217 (w), 1182 (w), 1147 (w), 1124 (w), 1095 (w), 1047 (w), 1010 (w), 848 (w), 837 (w), 813 (w), 759 (s), 744 (s), 667 (w).

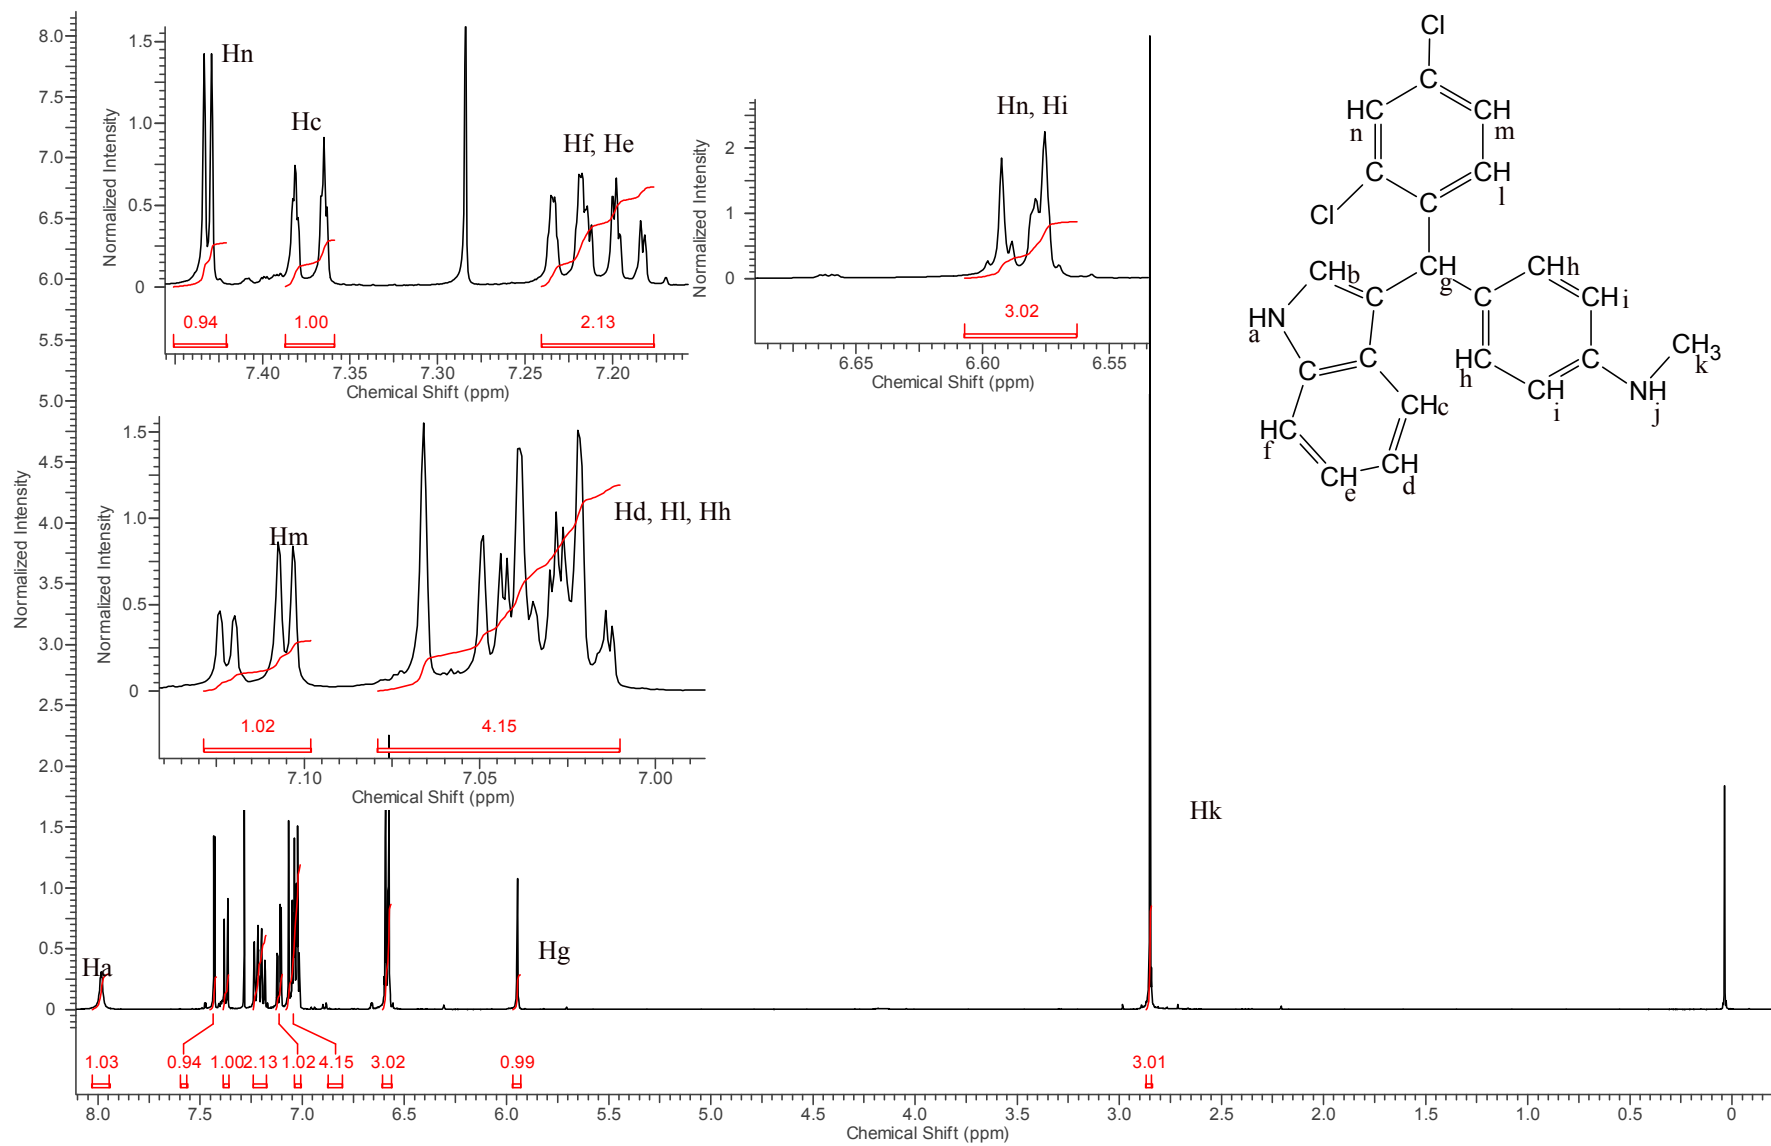

<sup>1</sup>H NMR (500 MHz, CDCl<sub>3</sub>) δ = 7.98 (br s, 1 H), 7.43 (d, *J* = 2.1 Hz, 1 H), 7.37 (d, *J* = 8.2 Hz, 1 H), 7.24 - 7.18 (m, 2 H), 7.11 (dd, *J* = 2.1, 8.2, Hz, 1 H), 7.08 - 7.01 (m, 4 H), 6.61 - 6.56 (m, 3 H), 5.95 (s, 1 H), 2.85 (s, 3 H).



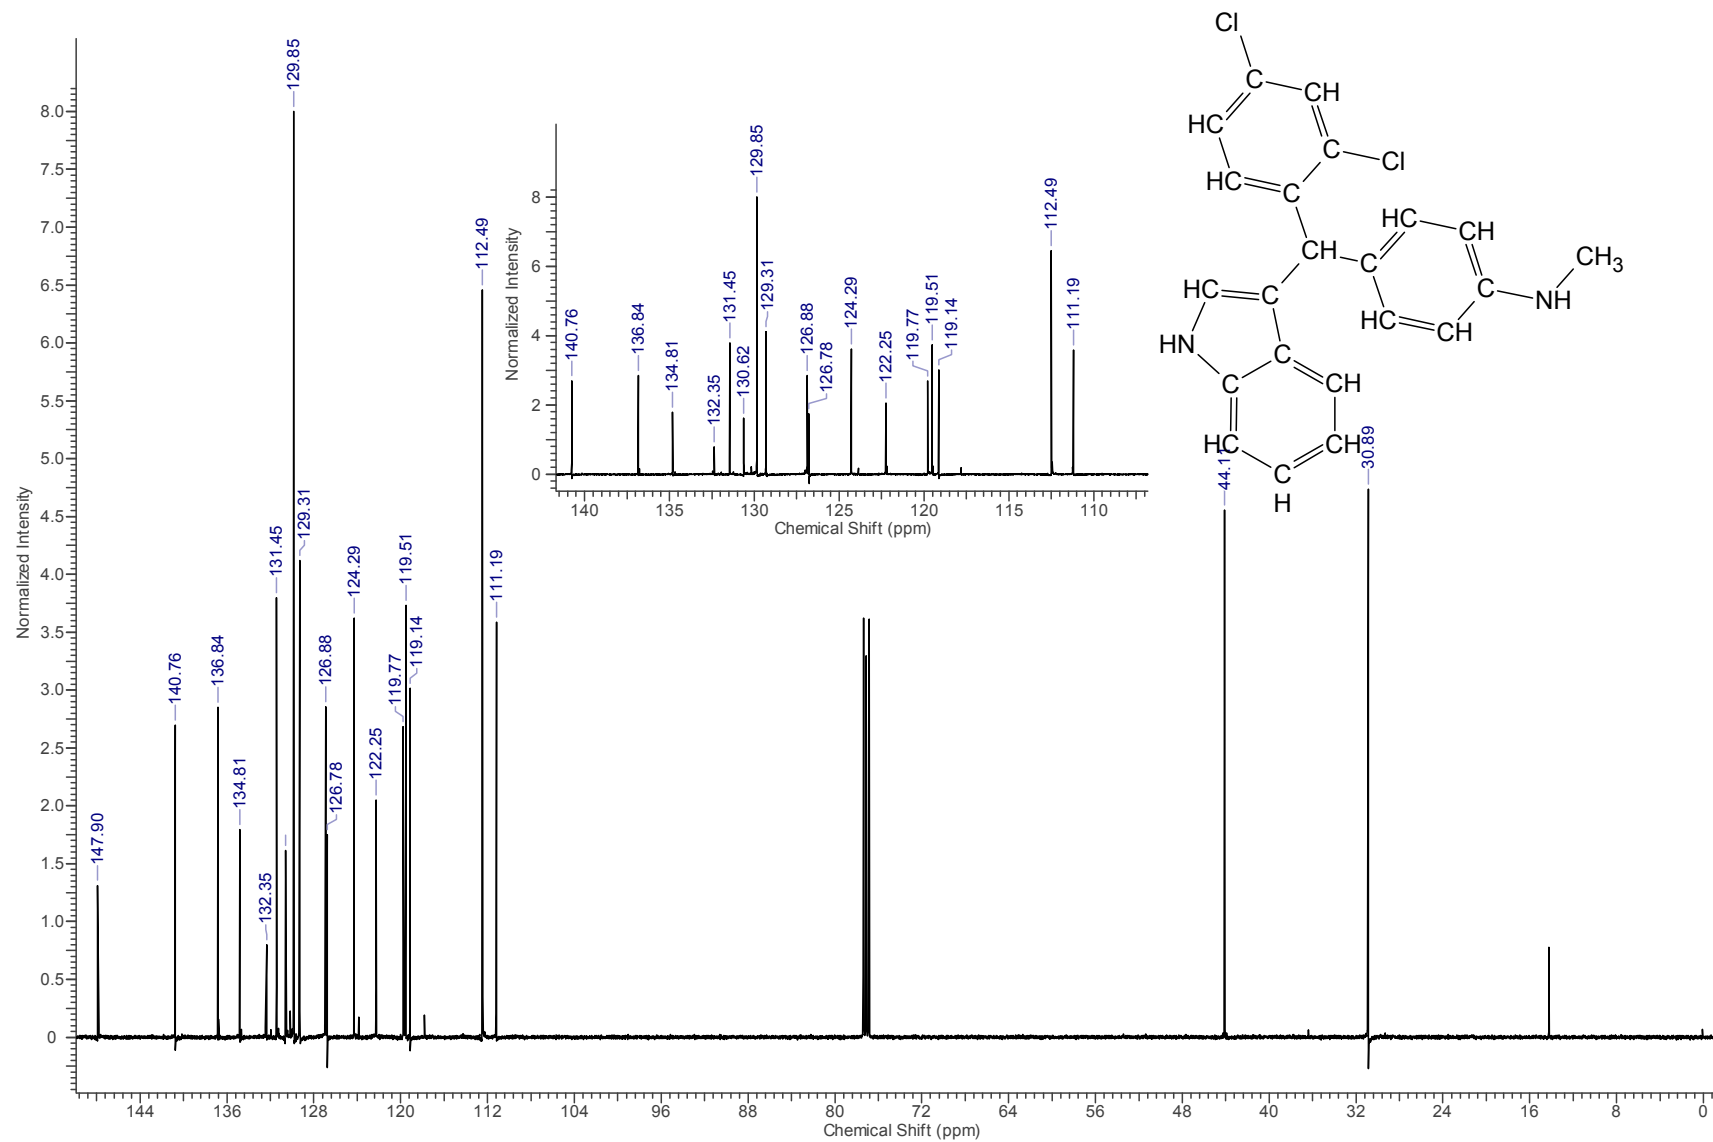

<sup>13</sup>C NMR (126 MHz, CDCl<sub>3</sub>) δ = 147.90, 140.76, 136.84, 134.81, 132.35, 131.45, 130.62, 129.85, 129.31, 126.88, 126.78, 124.29, 122.25, 119.77, 119.51, 119.14, 112.49, 111.19, 44.11, 30.89.

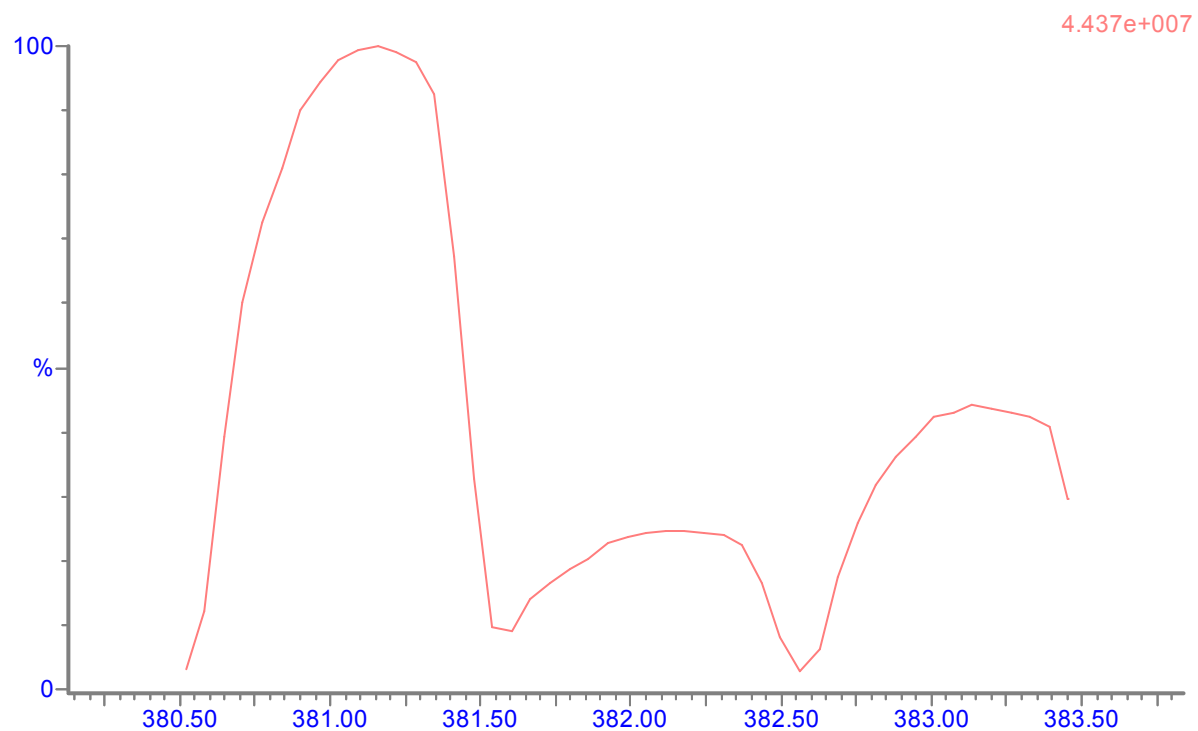

| Formula Mass | Daughter number | Parent m/z | Cone Voltage (V) | Daughters | Collision Energy (eV) | Ion Mode |
|--------------|-----------------|------------|------------------|-----------|-----------------------|----------|
| 381.29       | 1               | 383.07     | 48               | 221.63    | 34                    | ES+      |
|              | 2               | 383.07     | 48               | 221.12    | 38                    | ES+      |
|              | 3               | 383.07     | 48               | 366.07    | 20                    | ES+      |
|              | 4               | 383.07     | 48               | 238.09    | 42                    | ES+      |
|              | 5               | 383.07     | 48               | 214.09    | 44                    | ES+      |

**1.17 Piperonaldehyde (1q) + indole (2a) + N-methylaniline (3a): (6q) 4-[1,3-benzodioxol-5-yl(1H-indol-3-yl)methyl]-N-methylaniline**

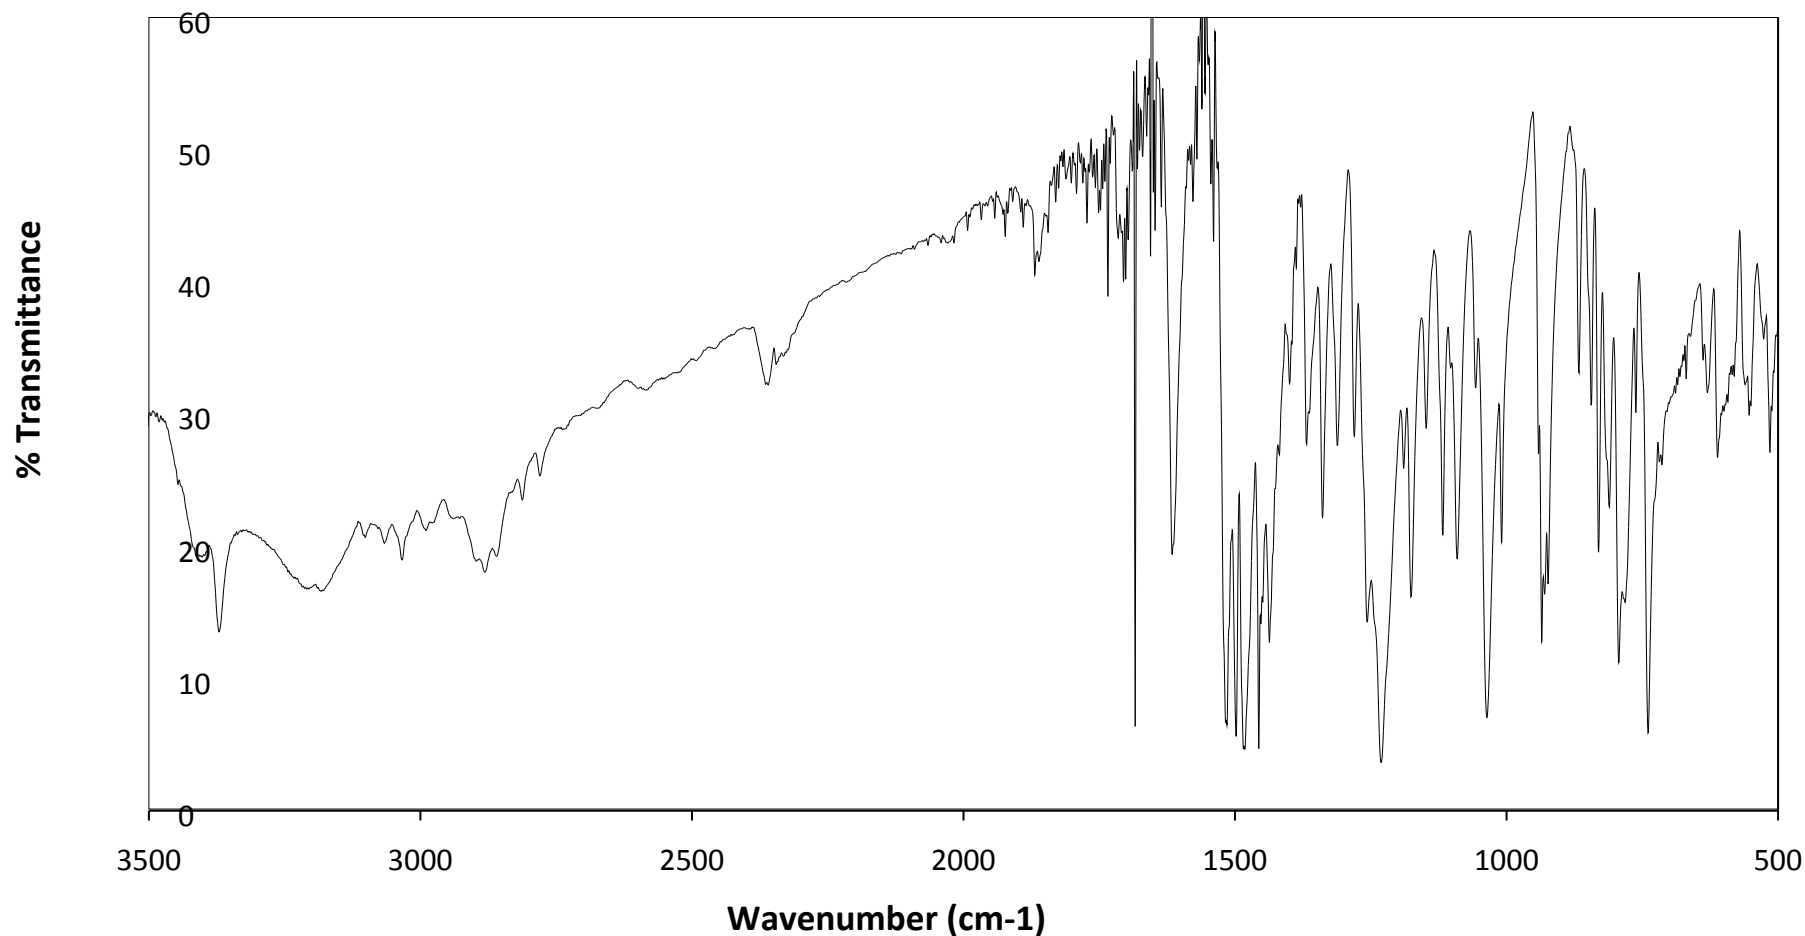

IR (KBr,  $\text{cm}^{-1}$ ): 3412 (s), 3371 (m), 3217 (m), 3178 (m), 3101 (m), 3066 (m), 3034 (m), 2991 (m), 2943 (m), 2881 (m), 2858 (m), 2812 (m), 2781 (m), 1683 (s), 1616 (m), 1516 (s), 1498 (s), 1481 (s), 1456 (s), 1436 (s), 1367 (m), 1338 (m), 1311 (m), 1280 (m), 1255 (s), 1230 (s), 1176 (s), 1147 (w), 1116 (m), 1091 (m), 1035 (s), 1008 (m), 935 (s), 866 (w), 831 (m), 810 (m), 792 (s), 738 (s), 611 (w).

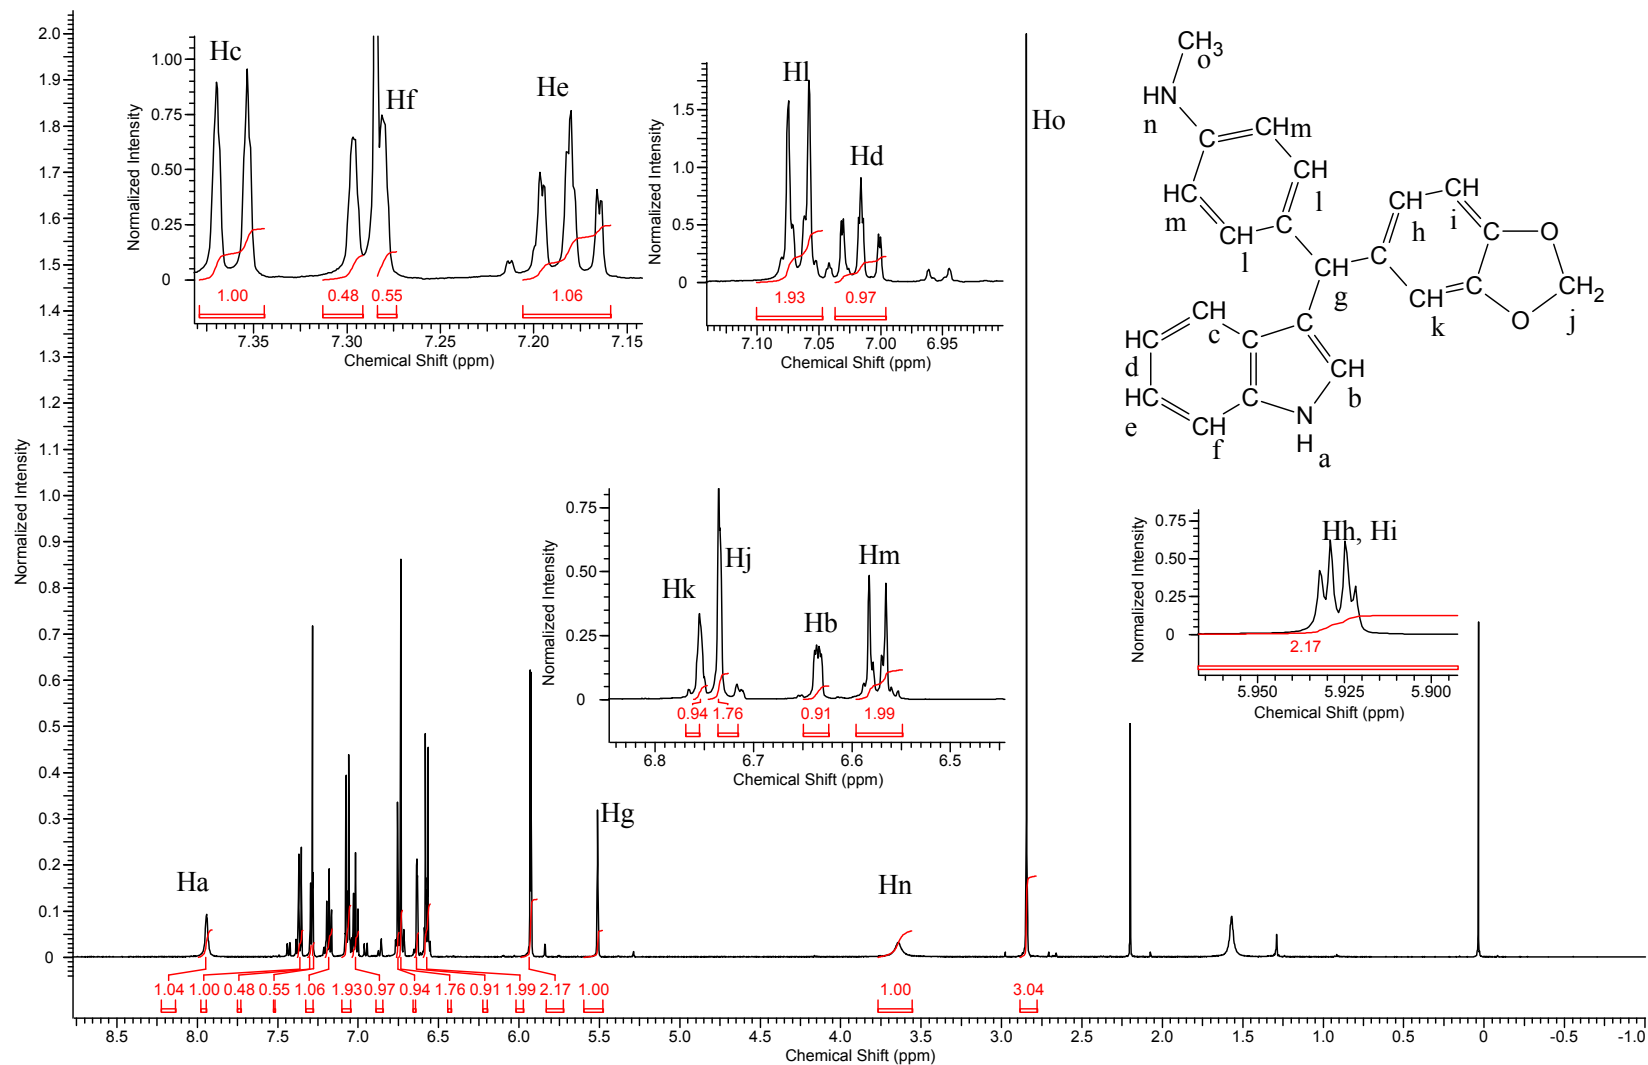

<sup>1</sup>H NMR (500MHz, CDCl<sub>3</sub>) δ = 7.94 (br s, 1 H), 7.36 (d, *J* = 8.0 Hz, 1 H), 7.30 (d, *J* = 7.9 Hz, 1 H), 7.18 (ddd, *J* = 0.9, 7.0, 7.9 Hz, 1 H), 7.07 (d, *J* = 8.5 Hz, 2 H), 7.02 (ddd, *J* = 0.9, 7.0, 7.9 Hz, 1 H), 6.75 (s, 1 H), 6.73 (s, 2 H), 6.63 (dd, *J* = 1.1, 2.3 Hz, 1 H), 6.58 (d, *J* = 8.5 Hz, 2 H), 5.93 (d, *J* = 1.53 Hz, 1H), 5.92 (d, *J* = 1.53 Hz, 1H), 5.51 (s, 1 H), 3.64 (br s, 1 H), 2.84 (s, 3 H).

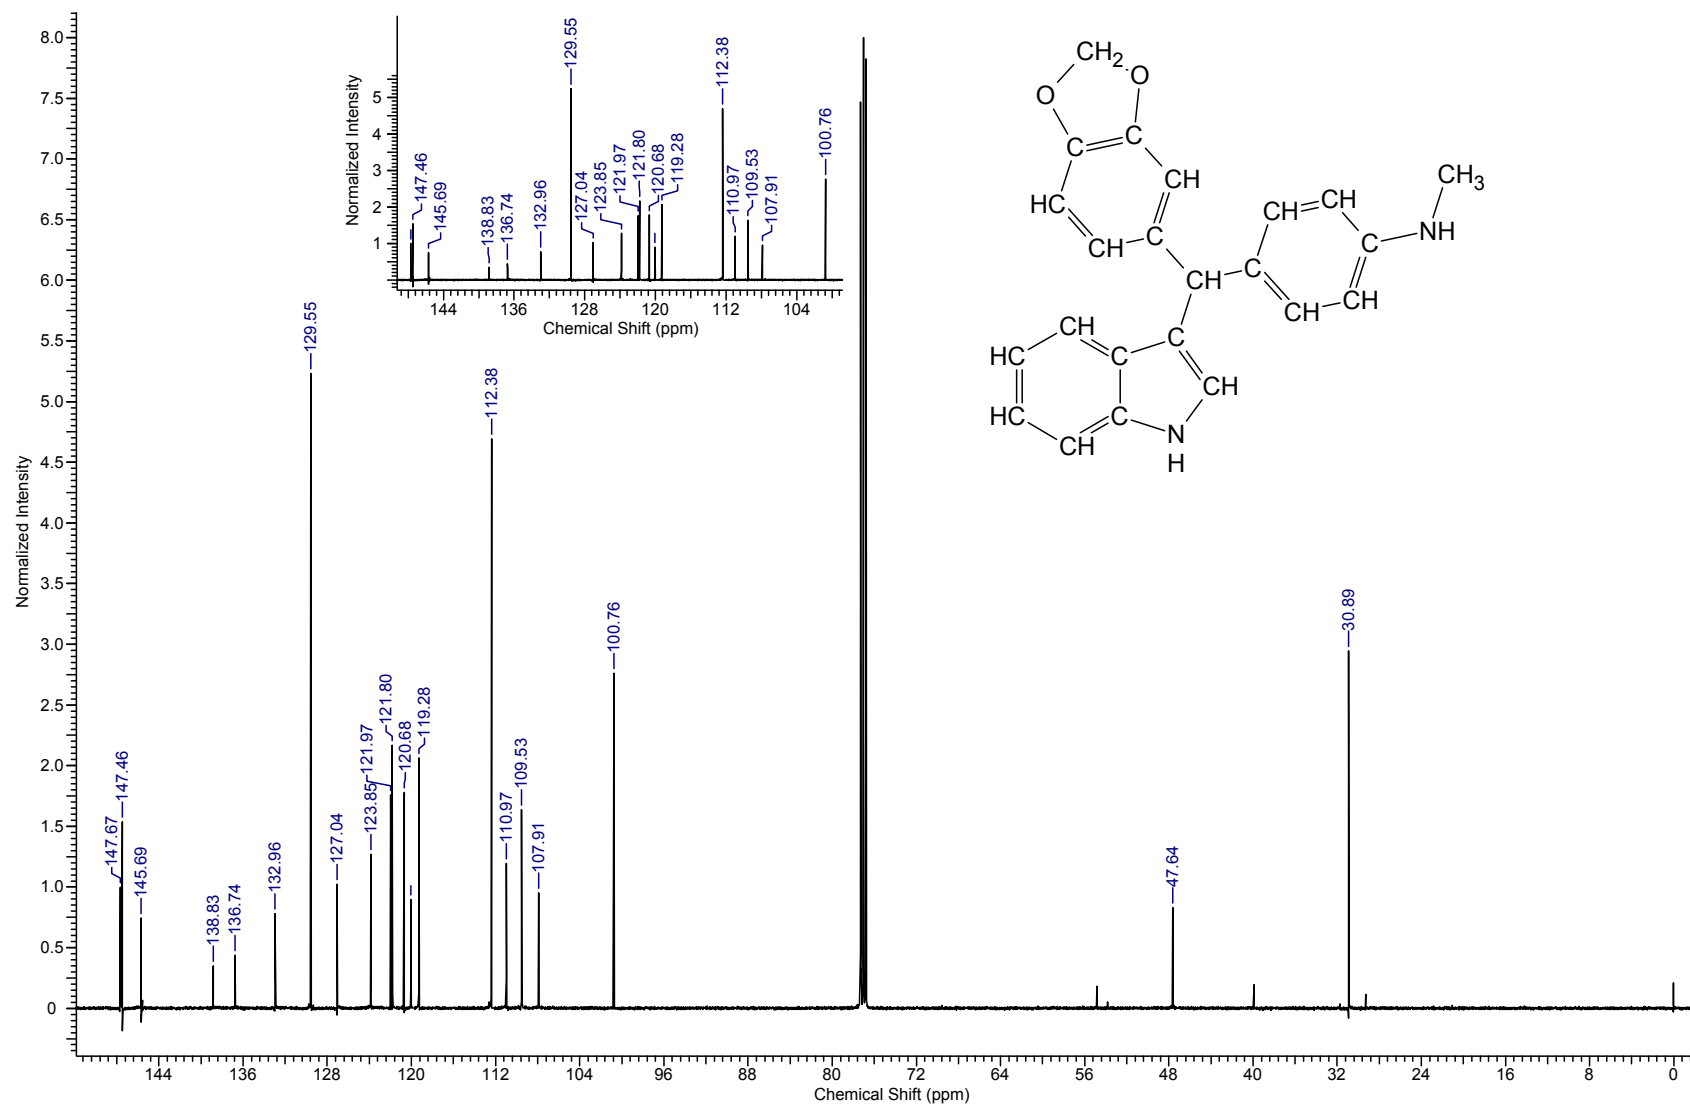

<sup>13</sup>C NMR (126 MHz, CDCl<sub>3</sub>) δ = 147.67, 147.46, 145.69, 138.83, 136.74, 132.96, 129.55, 127.04, 123.85, 121.97, 121.80, 120.68, 120.05, 119.28, 112.38, 110.97, 109.53, 107.91, 100.76, 47.64, 30.89.

For this compound a direct probe was used to obtain the mass spectrum. The following peaks were obtained:

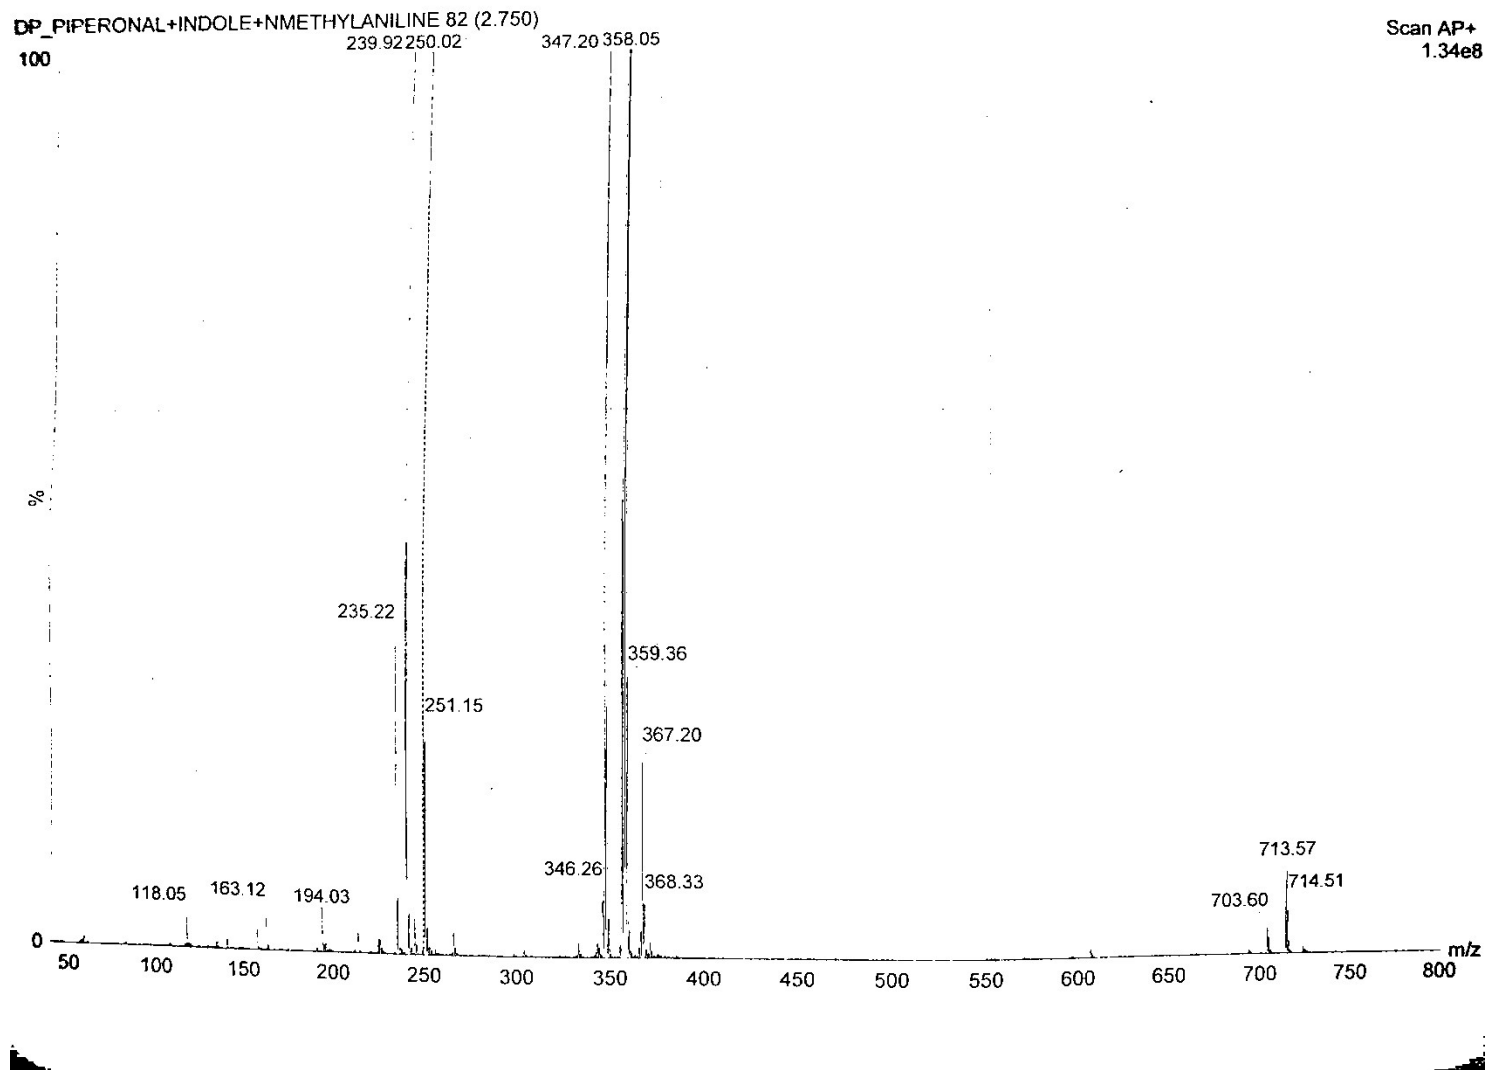

**1.18 Cyclohexanecarboxaldehyde (1r) + indole (2a) + *N*-Methylaniline (3a): (6r) 4-[cyclohexyl(1*H*-indol-3-yl)methyl]-*N*-methylaniline**

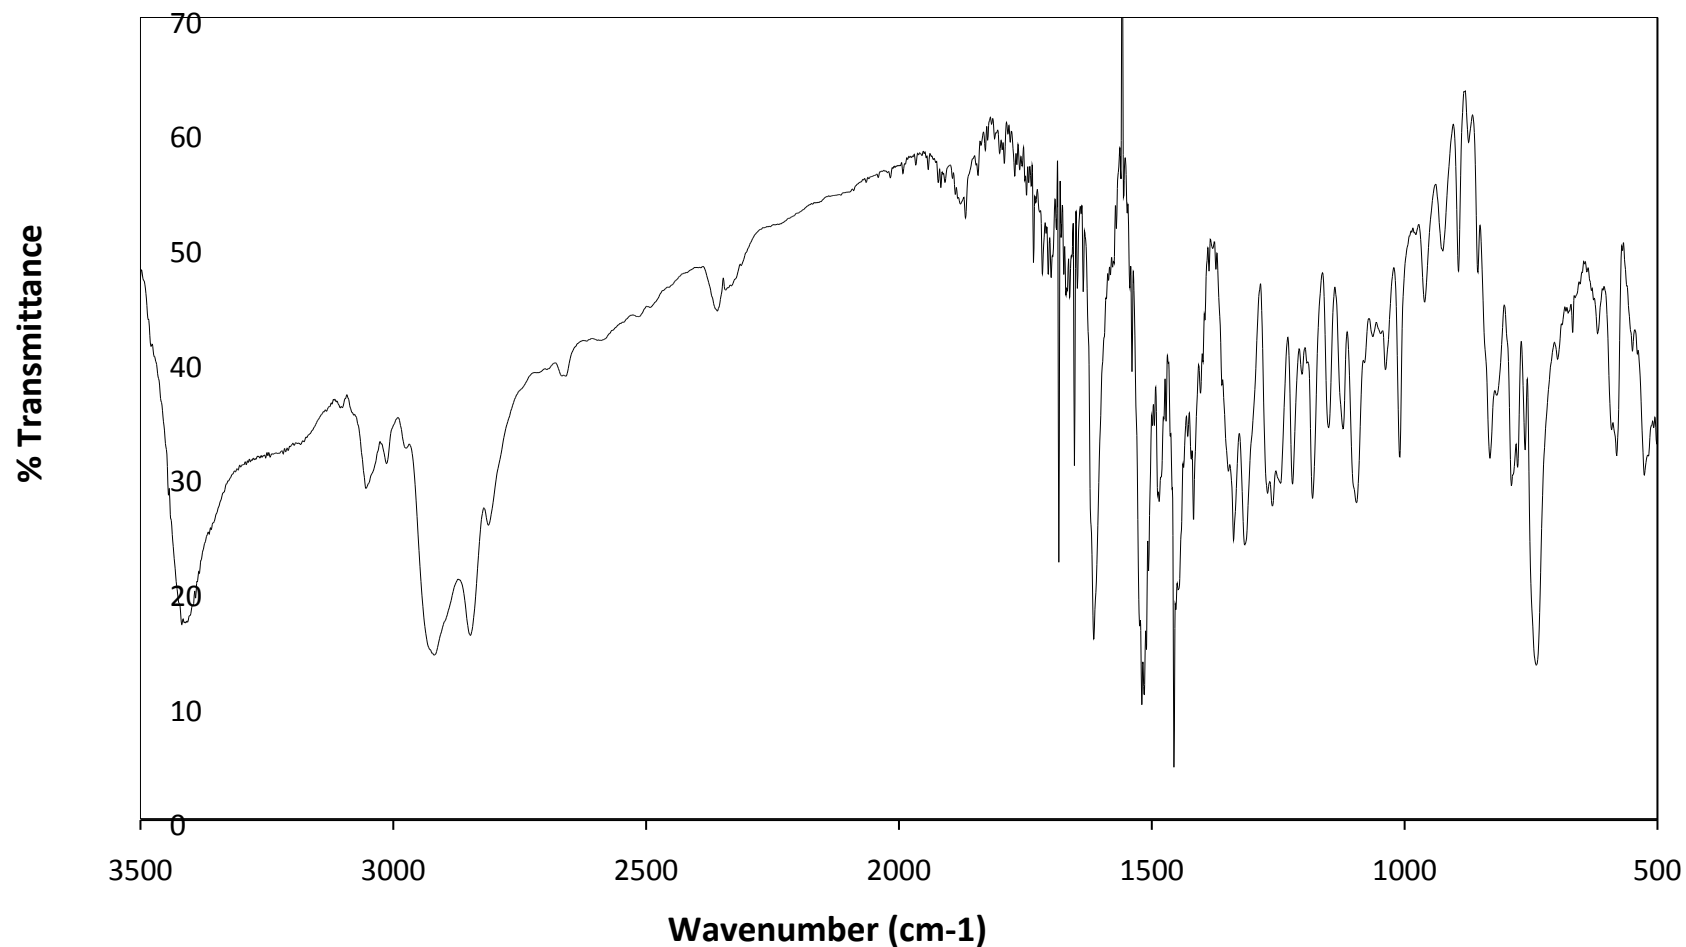

IR (KBr, cm<sup>-1</sup>): 3417 (br, s), 3053 (m), 3012 (m), 2920 (s), 2846 (s), 2810 (m), 1683 (s), 1614 (s), 1519 (s), 1456 (s), 1417 (w), 1338 (m), 1315 (m), 1261 (m), 1220 (w), 1182 (w), 1149 (w), 1122 (w), 1095 (w), 1008 (w), 960 (w), 923 (w), 831 (w), 788 (w), 738 (s), 617 (w).

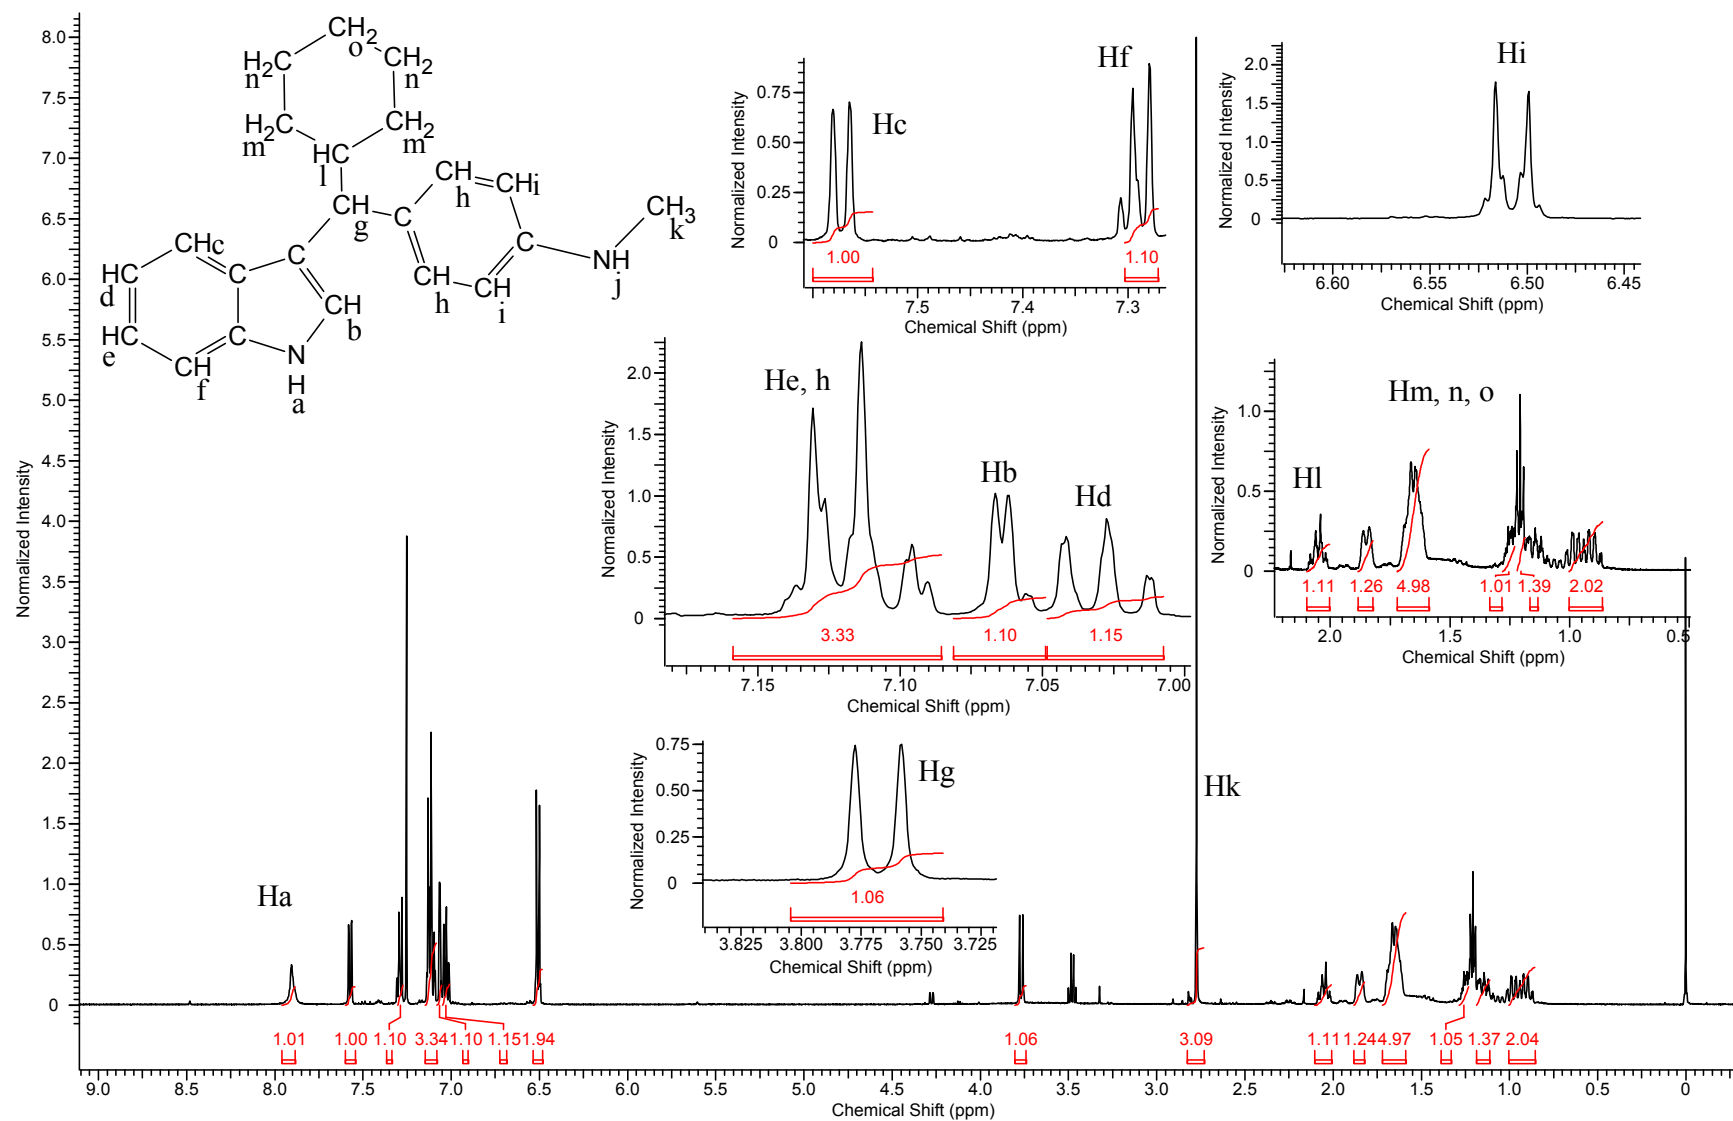

<sup>1</sup>H NMR (500MHz, CDCl<sub>3</sub>) δ = 7.90 (br s, 1H), 7.57 (d, *J* = 7.9 Hz, 1 H), 7.29 (d, *J* = 7.9 Hz, 1 H), 7.15 - 7.08 (m, 3 H), 7.06 (d, *J* = 2.4 Hz, 1 H), 7.02 (t, *J* = 7.5 Hz, 1 H), 6.51 (d, *J* = 8.5 Hz, 2 H), 3.77 (d, *J* = 9.8 Hz, 1 H), 2.77 (s, 3 H), 2.10 – 2.01 (m, 1 H), 1.85 (d, *J* = 11.9 Hz, 1 H), 1.69 – 1.59 (m, 5 H), 1.28 – 1.23 (m, 1 H), 1.18 – 1.11 (m, 1 H), 1.00 - 0.89 (m, 2 H).



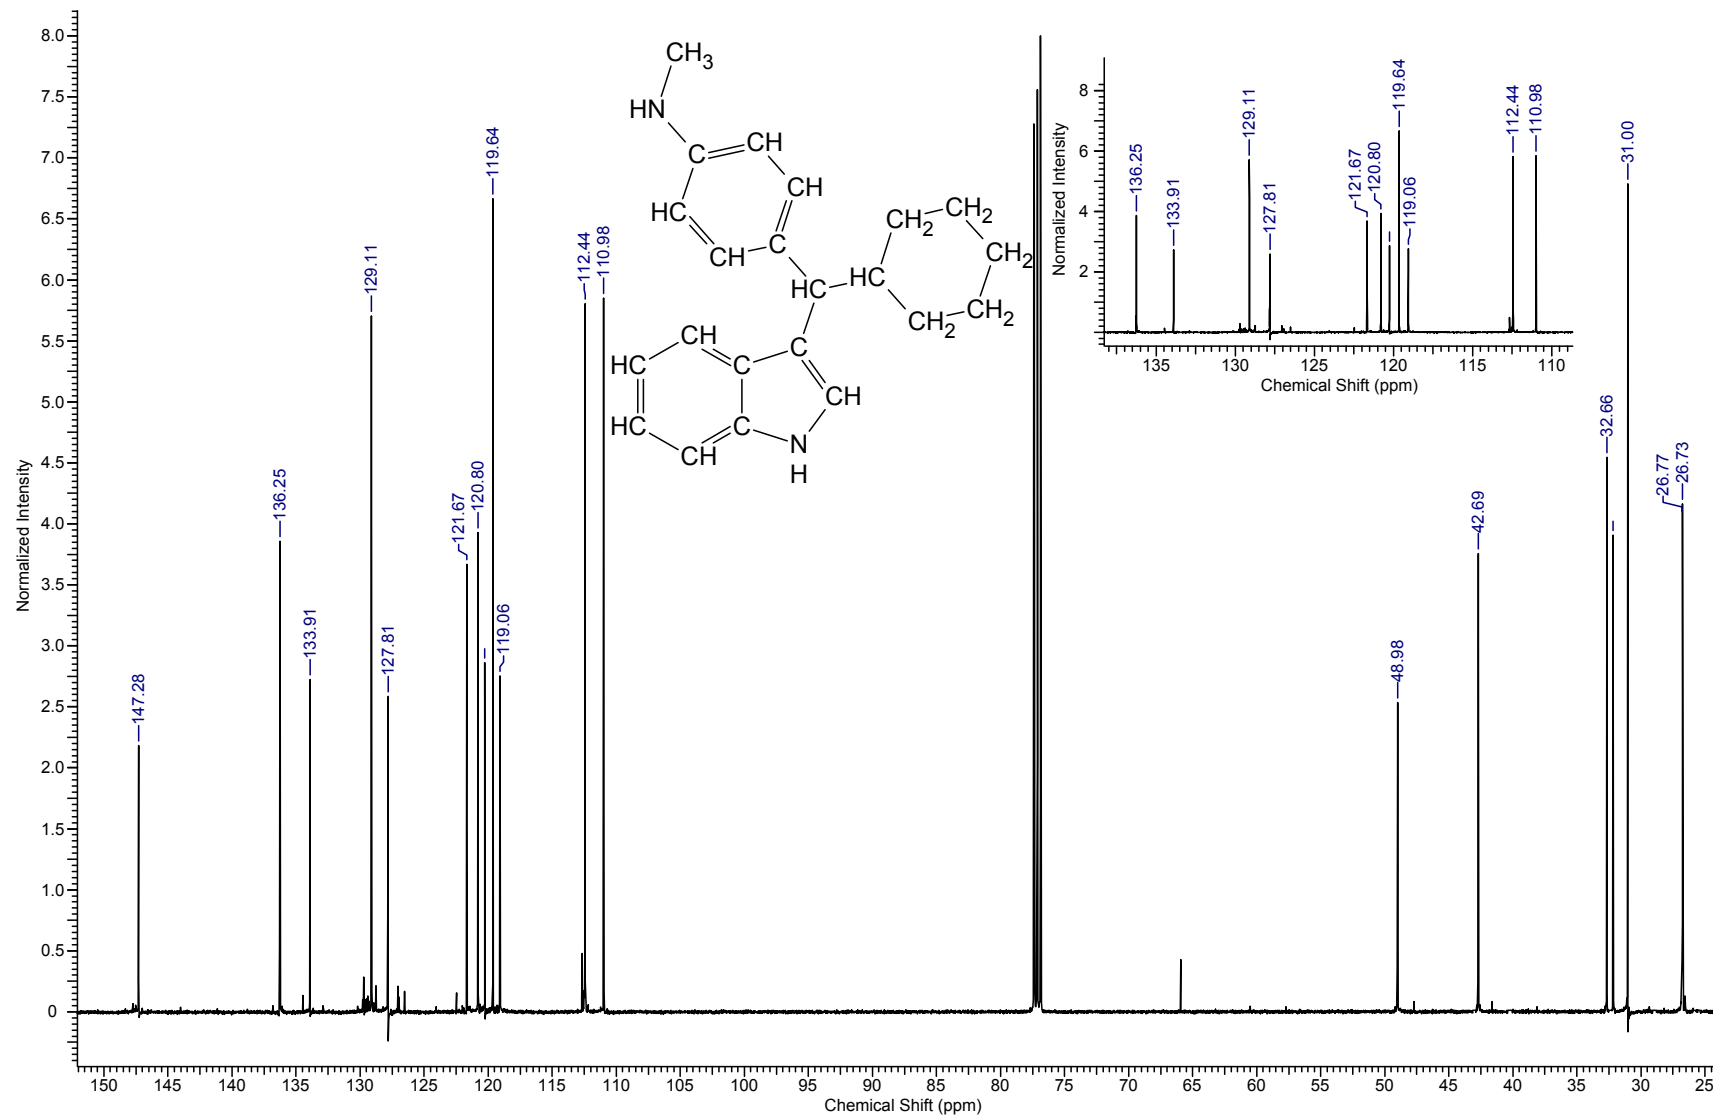

<sup>13</sup>C NMR (126 MHz, CDCl<sub>3</sub>) δ = 147.28, 136.25, 133.91, 129.11, 127.81, 121.67, 120.80, 120.26, 119.64, 119.06, 112.44, 110.98, 48.98, 42.69, 32.66, 32.16, 31.00, 26.77, 26.73.

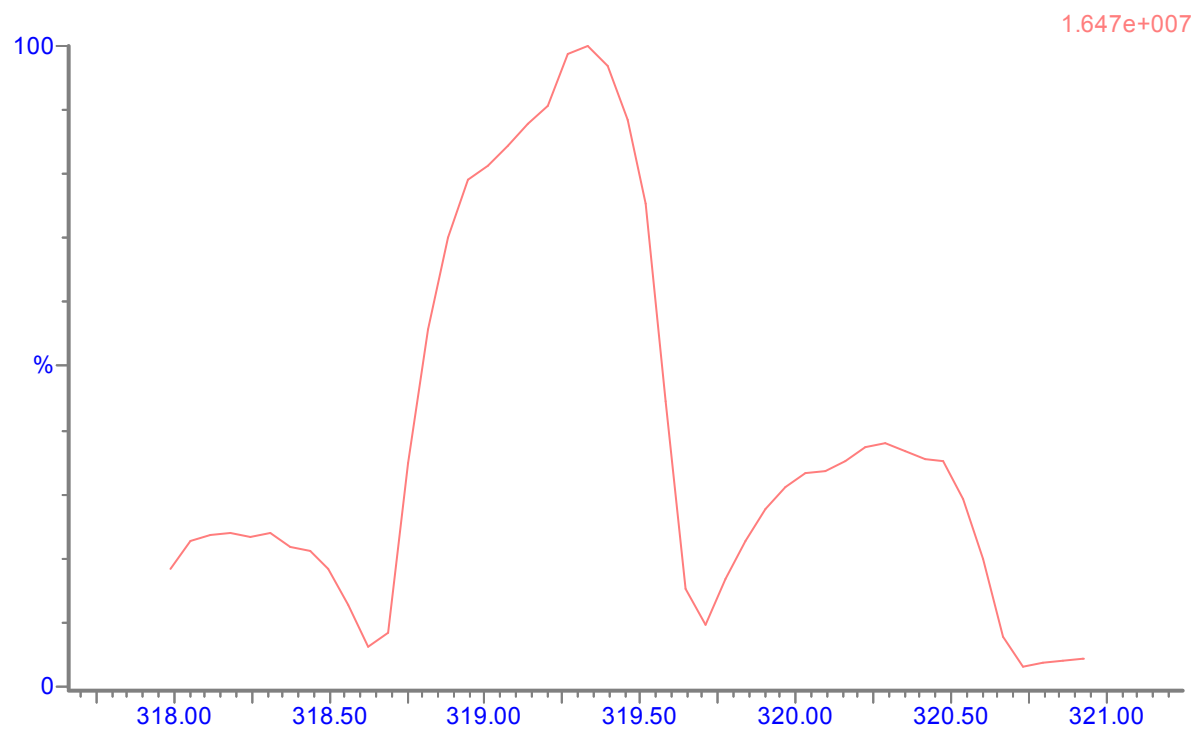

| Formula Mass | Daughter number | Parent m/z | Cone Voltage (V) | Daughters | Collision Energy (eV) | Ion Mode |
|--------------|-----------------|------------|------------------|-----------|-----------------------|----------|
| 318.47       | 1               | 319.18     | 42               | 120.05    | 26                    | ES+      |
|              | 2               | 319.18     | 42               | 130.07    | 22                    | ES+      |
|              | 3               | 319.18     | 42               | 204.14    | 58                    | ES+      |
|              | 4               | 319.18     | 42               | 77.06     | 76                    | ES+      |

**1.19 4-Biphenylcarboxaldehyde (1s) + indole (2a) + *N*-methylaniline (3a): (6s) 4-[1*H*-indol-3-yl(biphenyl-4-yl)methyl]-*N*-methylaniline**

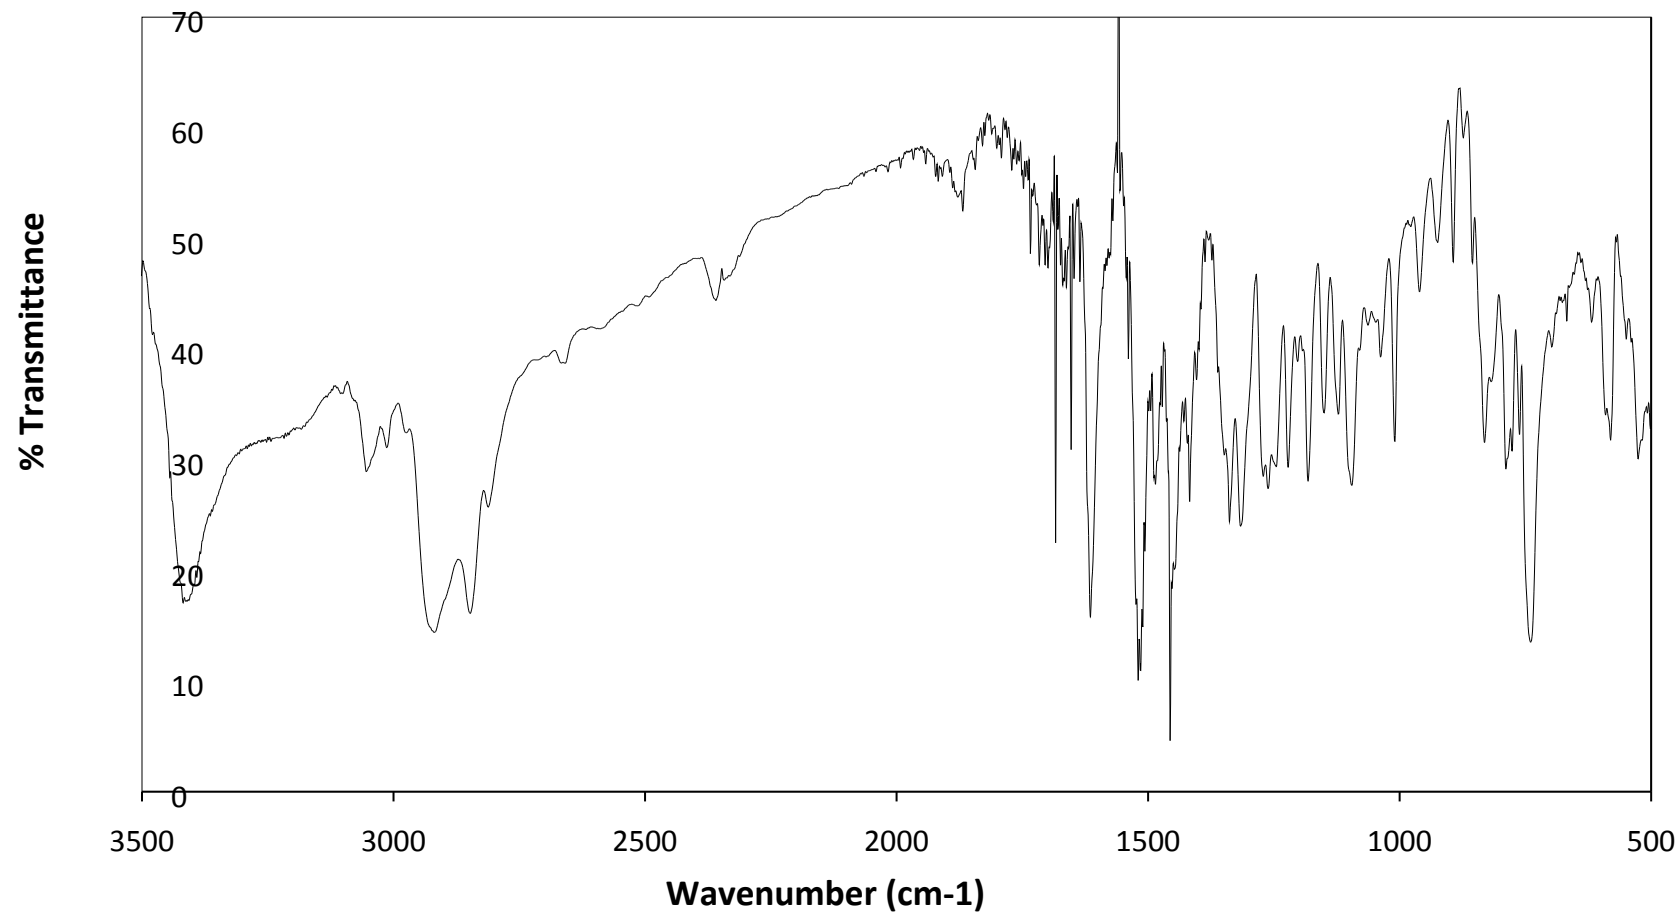

IR (KBr,  $\text{cm}^{-1}$ ): 3417 (br, s), 3053 (m), 3012 (m), 2920 (s), 2846 (s), 2810 (m), 1683 (m), 1652 (m), 1614 (s), 1519 (s), 1485 (w), 1456 (s), 1417 (w), 1338 (m), 1315 (m), 1261 (m), 1220 (m), 1182 (m), 1149 (w), 1122 (w), 1095 (m), 1010 (w), 960 (w), 925 (w), 893 (w), 831 (m), 788 (m), 738 (s), 617 (w).

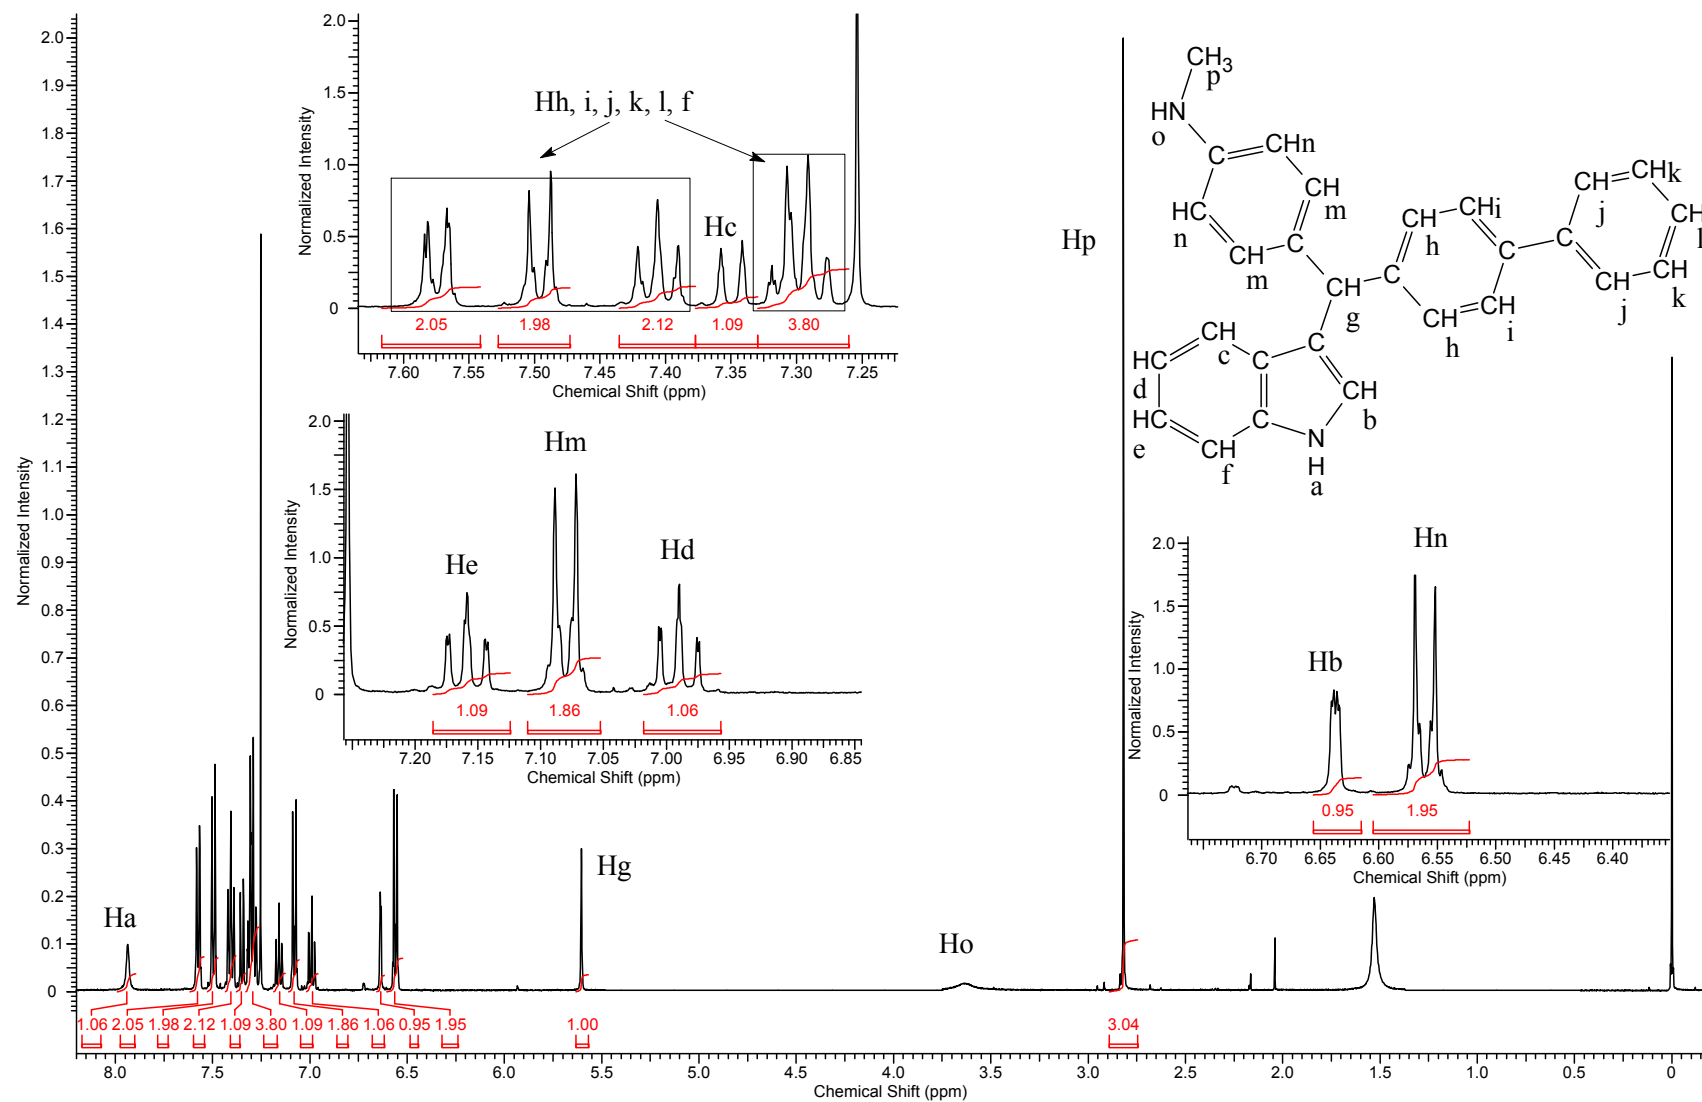

<sup>1</sup>H NMR (500MHz, CDCl<sub>3</sub>)  $\delta$  = 7.94 (br s, 1 H), 7.62 - 7.54 (m, 2 H), 7.53 - 7.47 (m, 2 H), 7.44 - 7.38 (m, 2 H), 7.35 (d,  $J$  = 8.2 Hz, 1 H), 7.33 - 7.26 (m, 4 H), 7.16 (ddd,  $J$  = 0.9, 7.0, 7.9 Hz, 1 H), 7.08 (d,  $J$  = 8.5 Hz, 2 H), 6.99 (ddd,  $J$  = 0.9, 7.1, 8.2 Hz, 1 H), 6.64 (dd,  $J$  = 0.9, 2.1 Hz, 1 H), 6.56 (d,  $J$  = 8.5 Hz, 2 H), 5.60 (s, 1 H), 2.82 (s, 3 H).

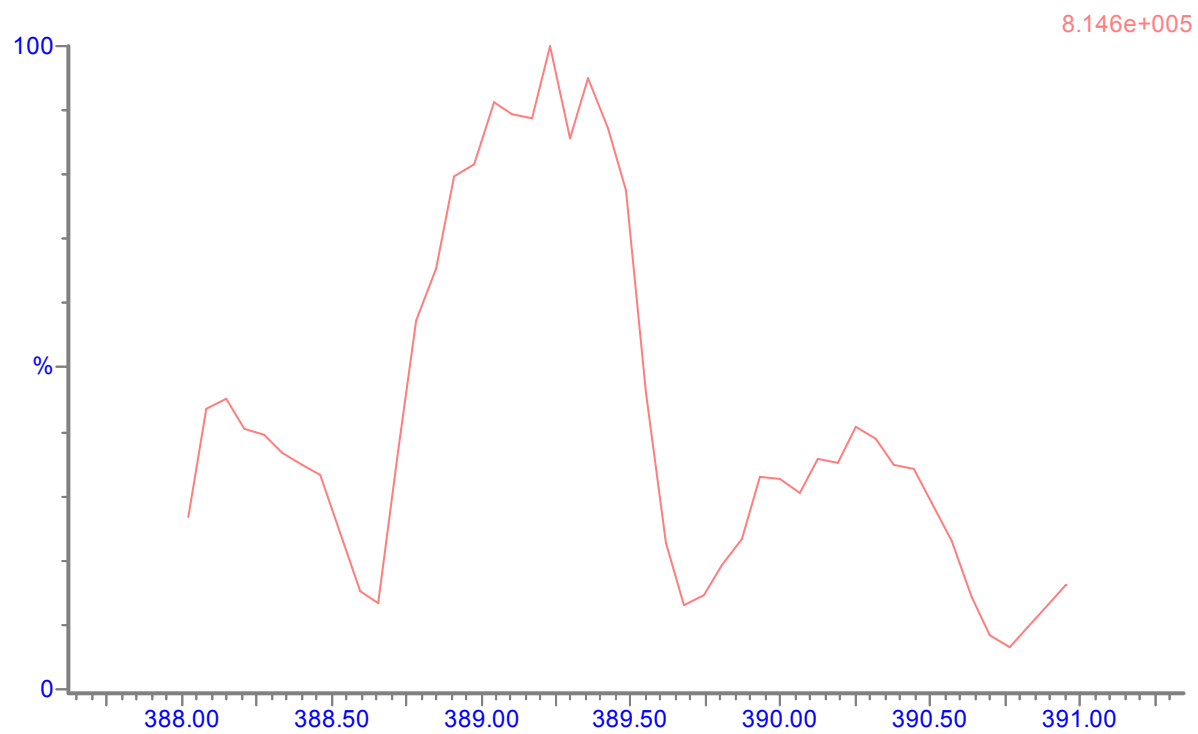

| Formula Mass | Daughter number | Parent m/z | Cone Voltage (V) | Daughters | Collision Energy (eV) | Ion Mode |
|--------------|-----------------|------------|------------------|-----------|-----------------------|----------|
| 388.50       | 1               | 389.15     | 44               | 221.12    | 40                    | ES+      |
|              | 2               | 389.15     | 44               | 373.96    | 28                    | ES+      |
|              | 3               | 389.15     | 44               | 272.17    | 22                    | ES+      |
|              | 4               | 389.15     | 44               | 280.37    | 46                    | ES+      |

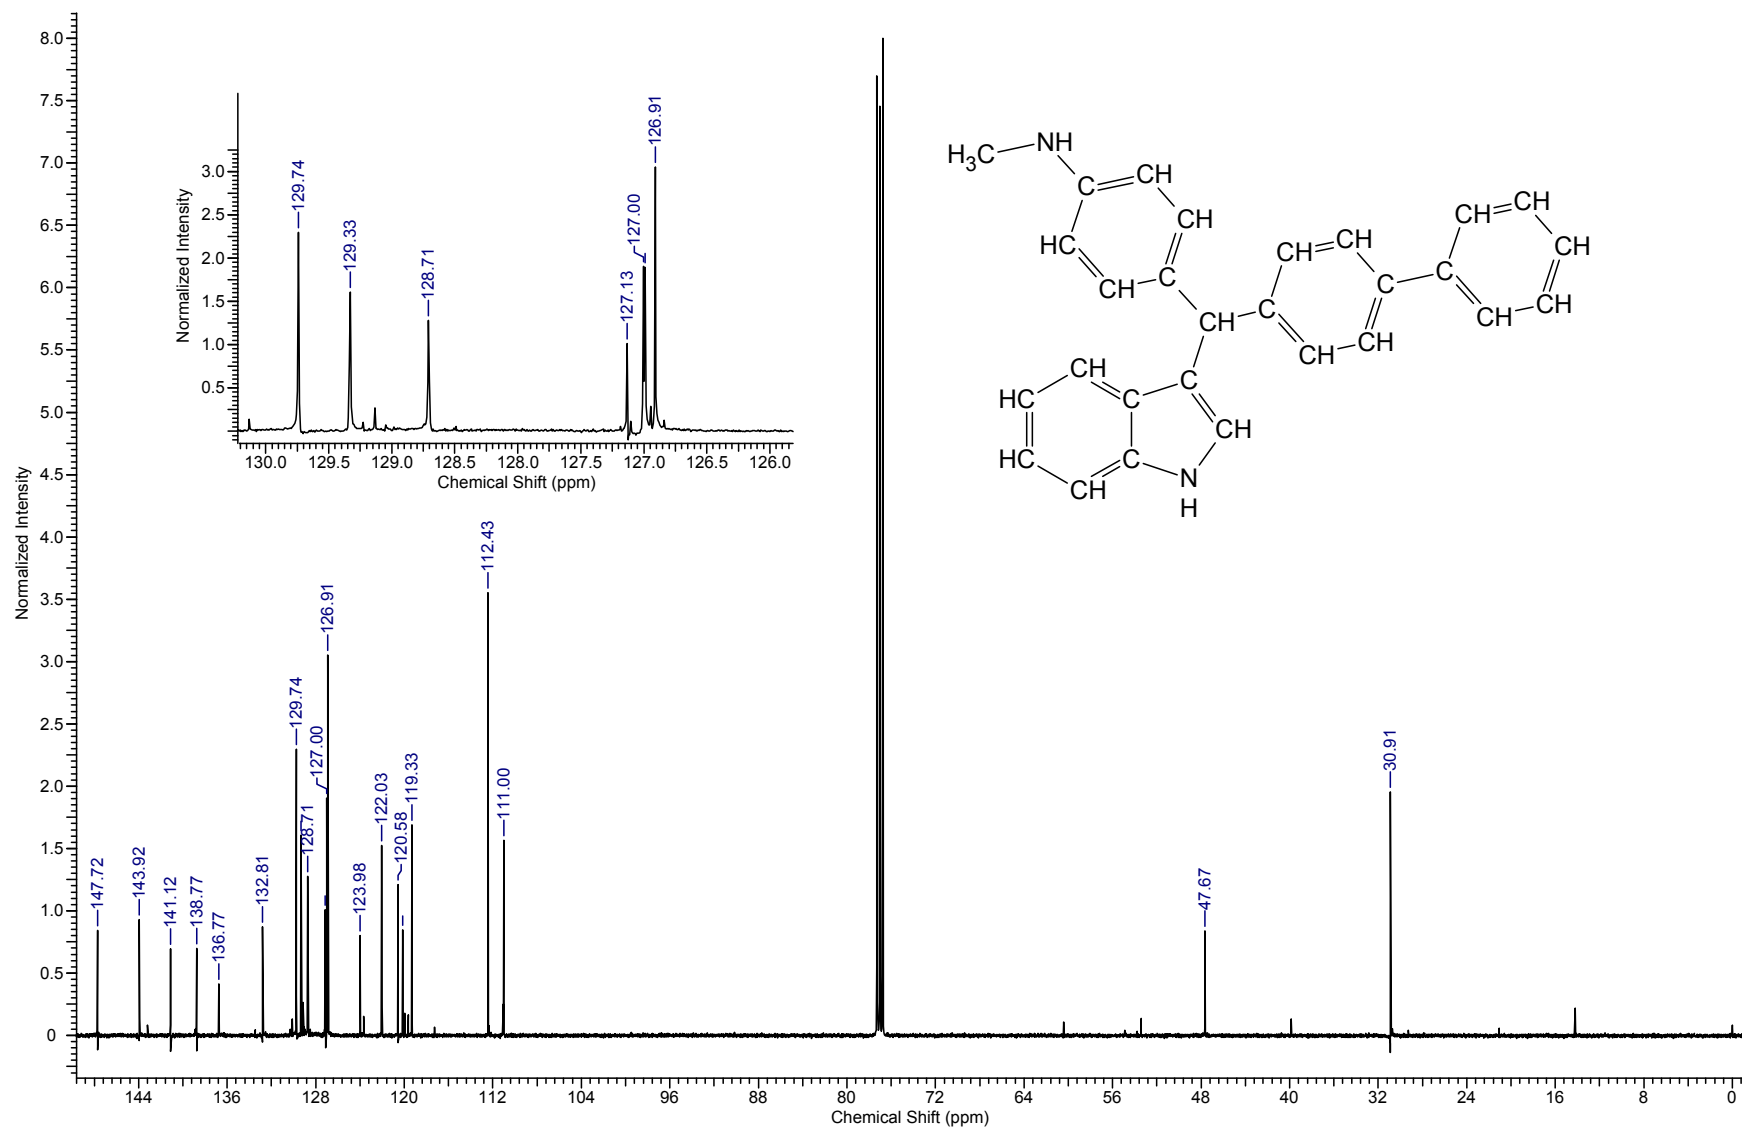

$^{13}\text{C}$  NMR (126 MHz,  $\text{CDCl}_3$ )  $\delta$  = 147.72, 143.92, 141.12, 138.77, 136.77, 132.81, 129.74, 129.33, 128.71, 127.13, 127.00, 126.99, 126.91, 123.98, 122.03, 120.58, 120.13, 119.33, 112.43, 111.00, 47.67, 30.91.

**1.20 1-Naphthaldehyde (1u) + indole (2a) + N-methylaniline (3a): (6u) 4-[1*H*-indol-3-yl(naphthalen-1-yl)methyl]-*N*-methylaniline**

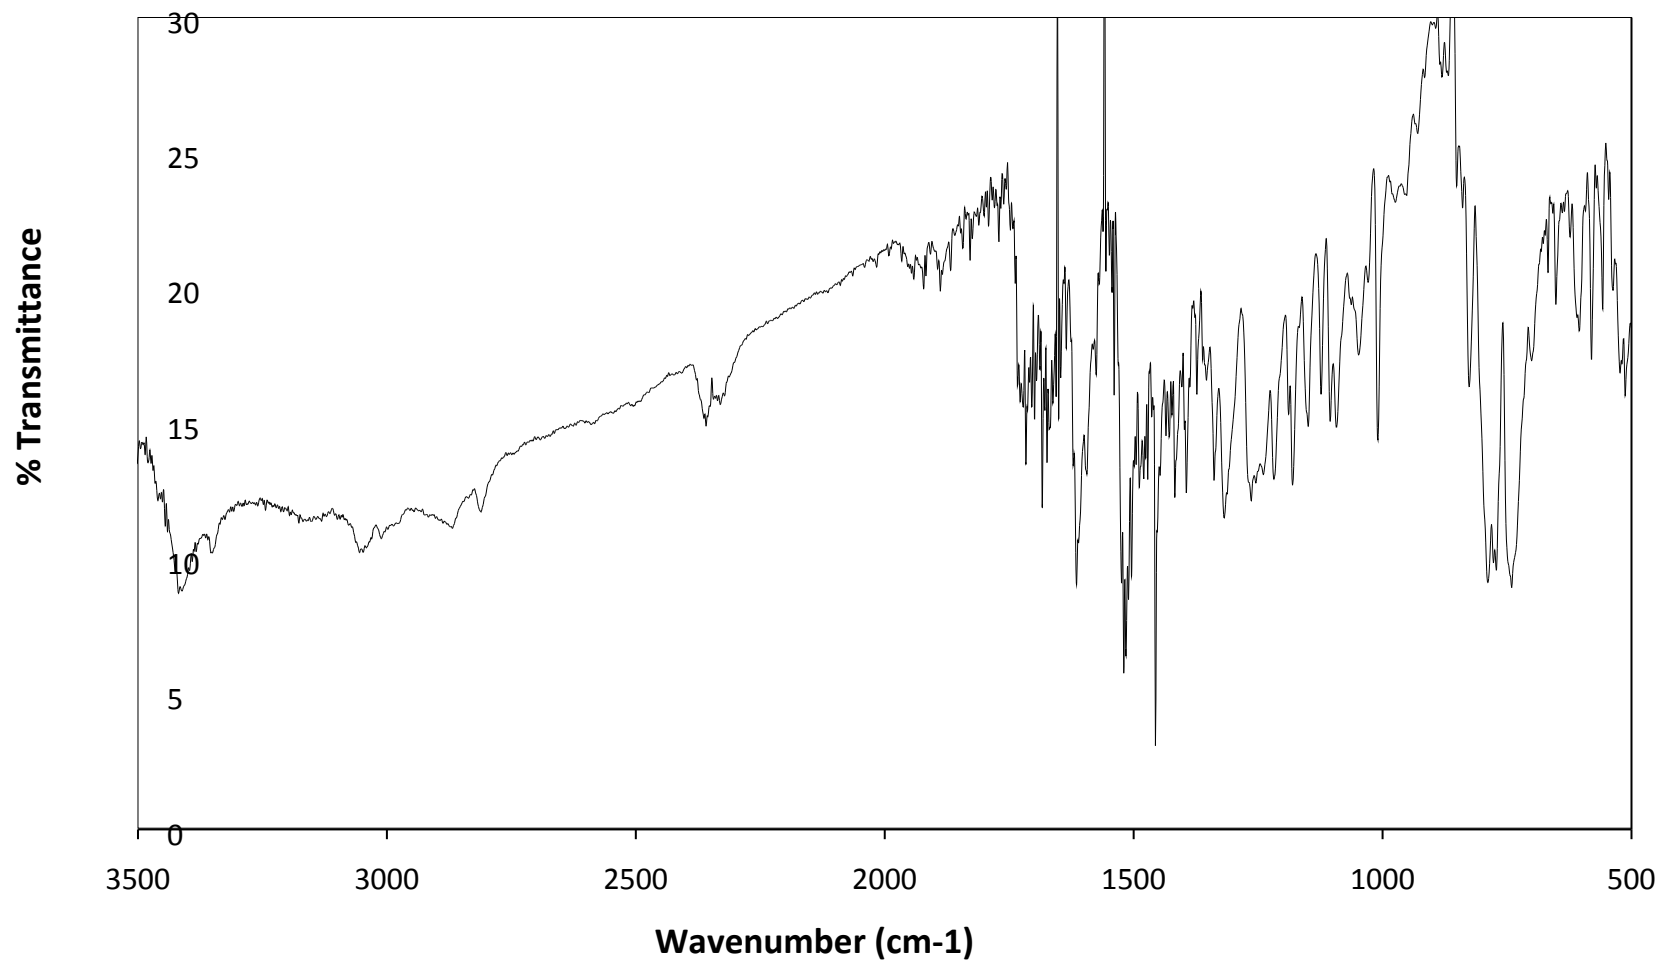

IR (KBr,  $\text{cm}^{-1}$ ): 3419 (s), 3350 (m), 3047 (m), 3012 (m), 2868 (m), 2810 (m), 1716 (m), 1683 (m), 1614 (m), 1519 (s), 1456 (s), 1417 (m), 1394 (m), 1338 (m), 1317 (m), 1263 (m), 1219 (m), 1180 (m), 1149 (m), 1105 (m), 1091 (m), 1049 (m), 1008 (w), 825 (m), 788 (m), 771 (m), 740 (s), 700 (m), 651 (w), 605 (w).

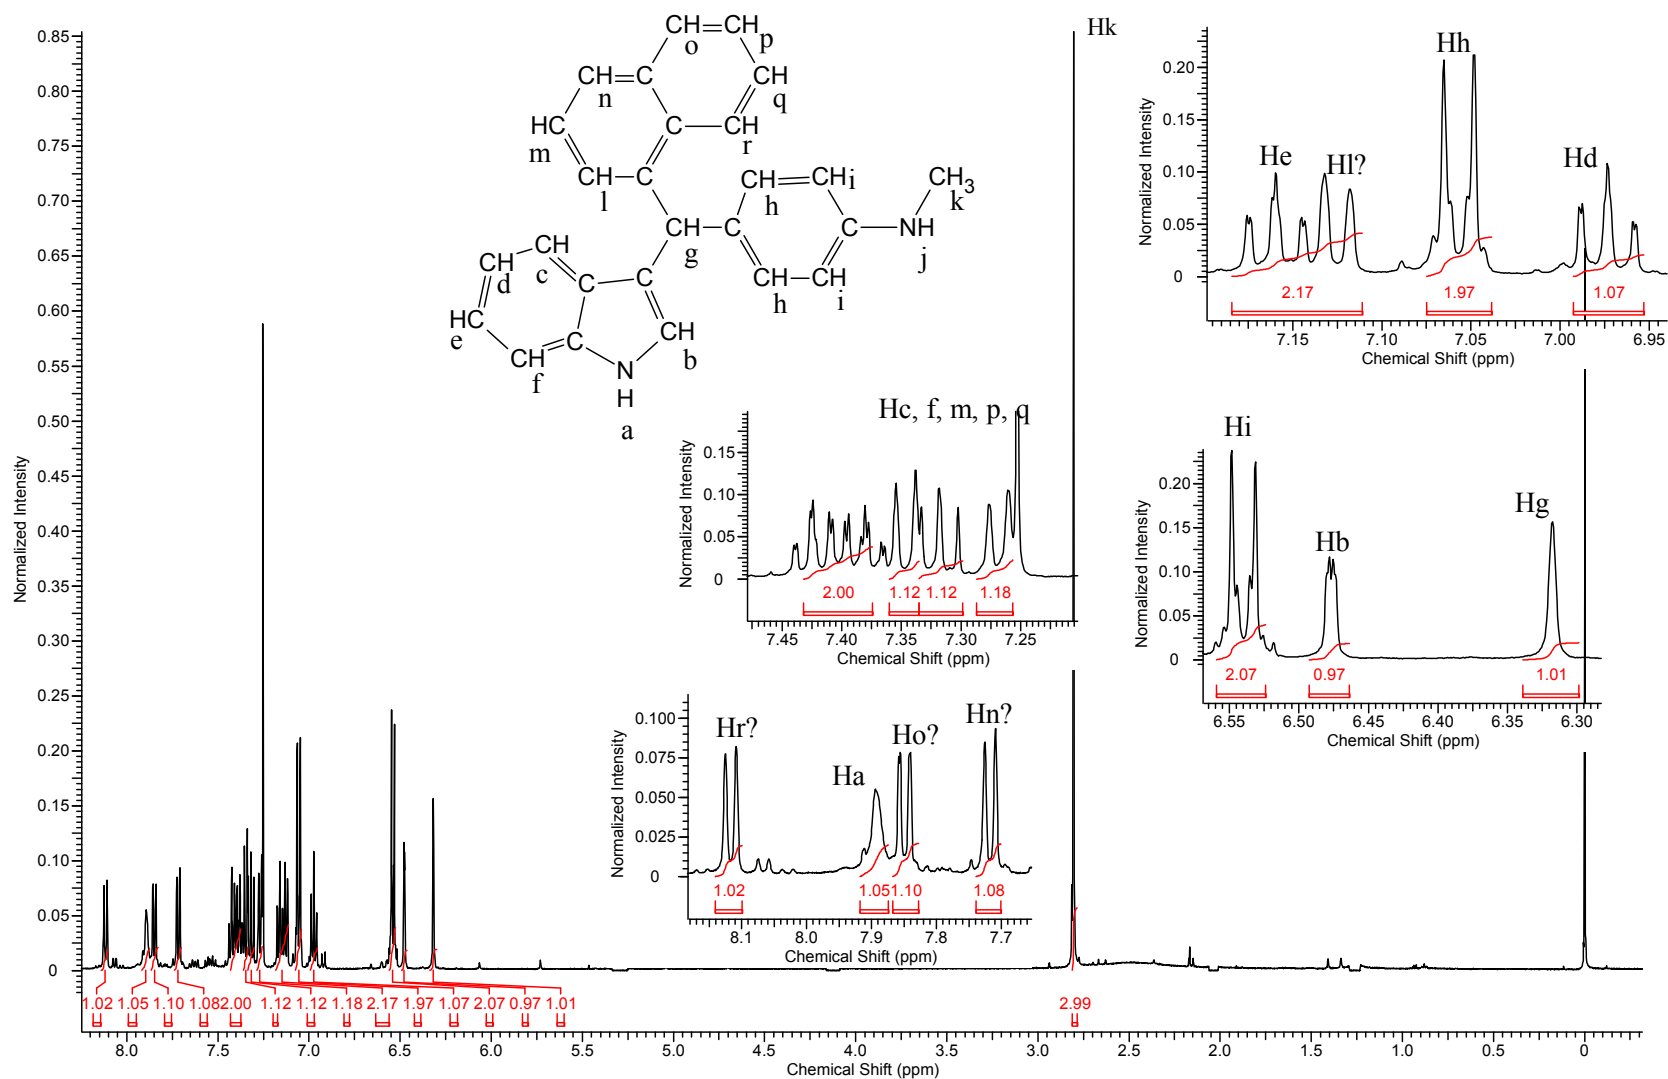

<sup>1</sup>H NMR (500MHz, CDCl<sub>3</sub>)  $\delta$  = 8.12 (d,  $J$  = 8.5 Hz, 1 H), 7.91 - 7.88 (m, 1 H), 7.85 (dd,  $J$  = 1.1, 8.4 Hz, 1 H), 7.72 (d,  $J$  = 8.2 Hz, 1 H), 7.45 - 7.38 (m, 2 H), 7.36 - 7.34 (m, 1 H), 7.34 - 7.28 (m, 1 H), 7.26 (d,  $J$  = 7.9 Hz, 1 H), 7.16 (dt,  $J$  = 0.9, 7.6 Hz, 1 H), 7.13 (d,  $J$  = 7.0 Hz, 1 H), 7.05 (d,  $J$  = 8.5 Hz, 2 H), 6.97 (t,  $J$  = 7.5 Hz, 1 H), 6.55 (d,  $J$  = 8.5 Hz, 2 H), 6.48 (dd,  $J$  = 1.1, 2.3 Hz, 1 H), 6.32 (s, 1 H), 2.81 (s, 3 H).





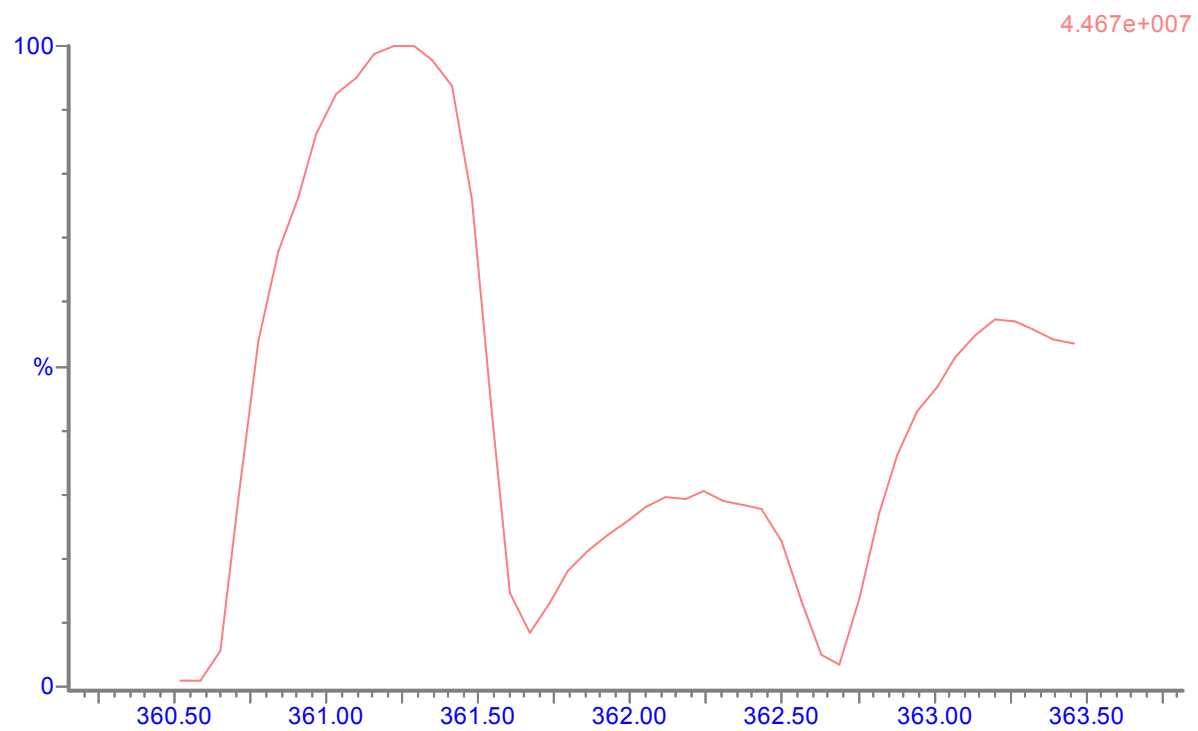

| Formula Mass | Daughter number | Parent m/z | Cone Voltage (V) | Daughters | Collision Energy (eV) | Ion Mode |
|--------------|-----------------|------------|------------------|-----------|-----------------------|----------|
| 362.46       | 1               | 363.14     | 58               | 254.10    | 34                    | ES+      |
|              | 2               | 363.14     | 58               | 244.15    | 32                    | ES+      |
|              | 3               | 363.14     | 58               | 202.07    | 60                    | ES+      |
|              | 4               | 363.14     | 58               | 229.06    | 48                    | ES+      |
|              | 5               | 363.14     | 58               | 215.15    | 50                    | ES+      |

## [2] Other Secondary Amines

### 2.1 Benzaldehyde (1a) + indole (2a) + *N*-ethylaniline (3b): (6v) *N*-ethyl-4-[1*H*-indol-3-yl(phenyl)methyl]aniline

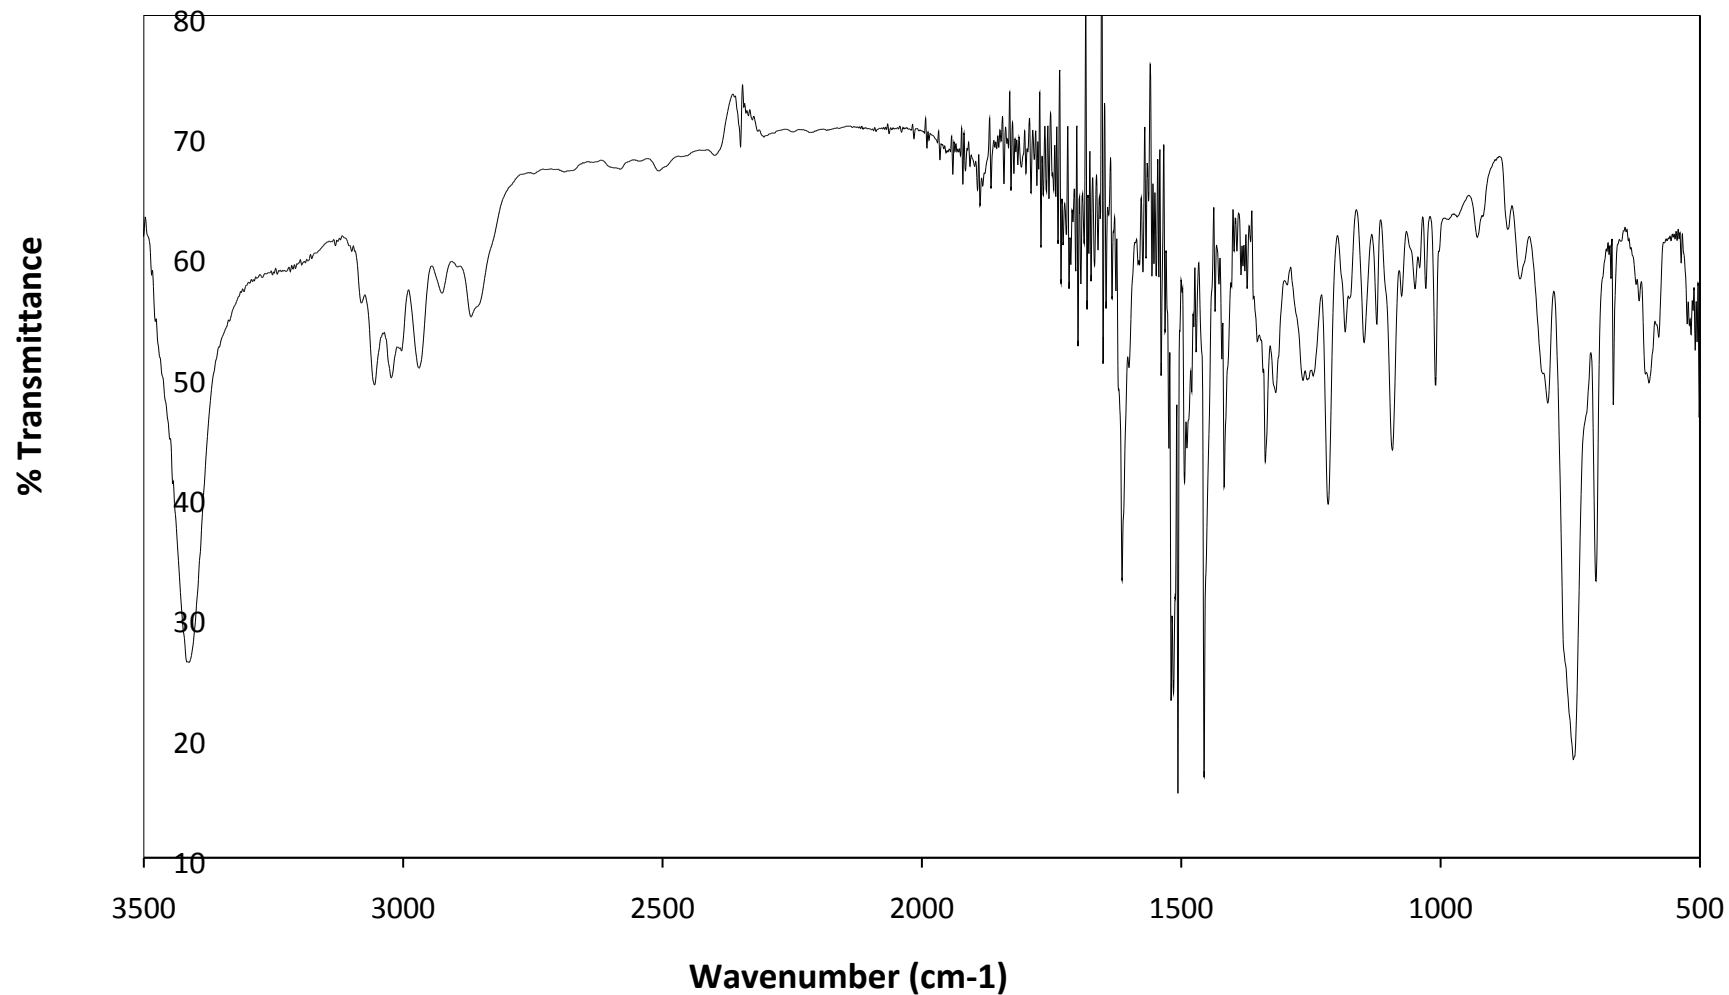

IR (KBr, cm<sup>-1</sup>): 3412 (br, s), 3082 (w), 3055 (w), 3022 (w), 3003 (w), 2968 (w), 2924 (w), 2870 (w), 1614 (s), 1519 (s), 1506 (s), 1492 (m), 1456 (s), 1417 (m), 1338 (m), 1317 (w), 1257 (w), 1217 (m), 1184 (w), 1147 (w), 1101 (w), 1093 (m), 1010 (w), 927 (w), 846 (w), 792 (w), 744 (s), 700 (m), 667 (w).

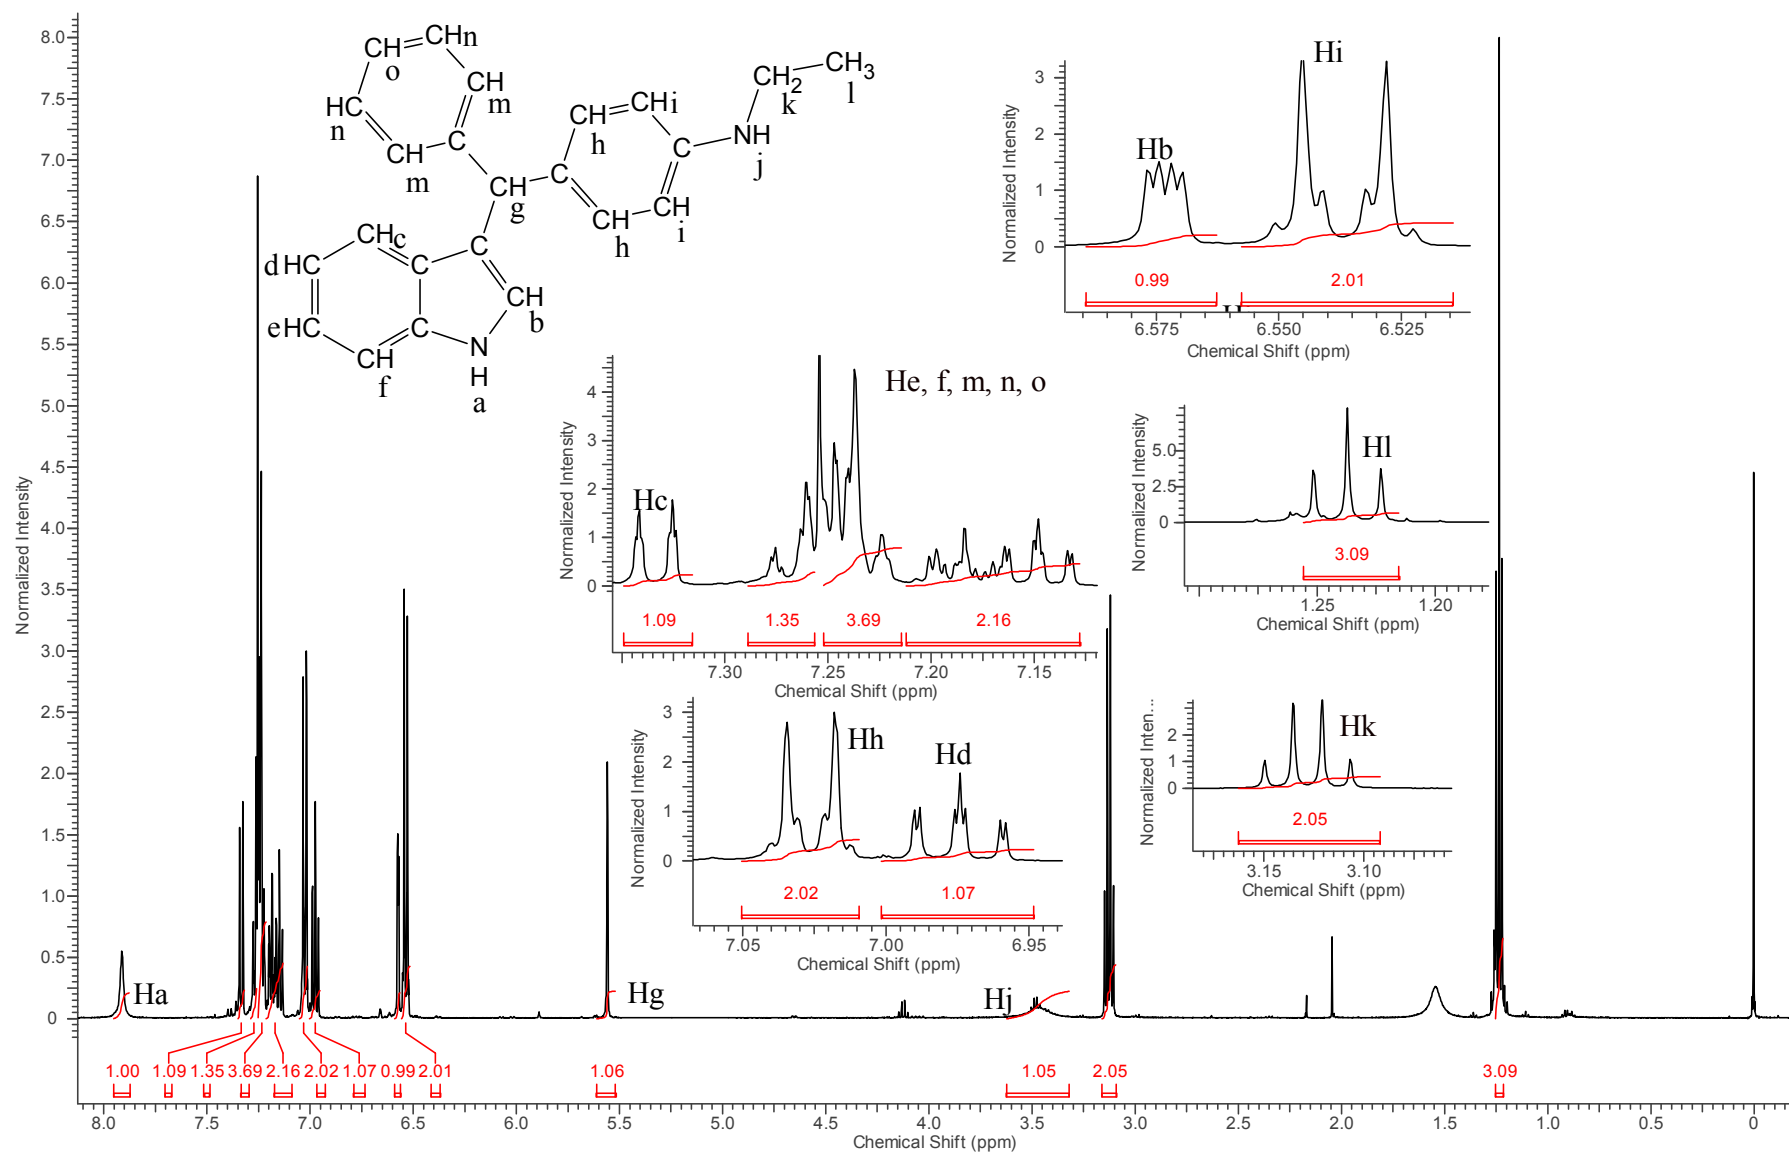

<sup>1</sup>H NMR (500MHz, CDCl<sub>3</sub>)  $\delta$  = 7.91 (br s, 1 H), 7.33 (d,  $J$  = 7.9 Hz, 1 H), 7.29 - 7.21 (m, 5 H), 7.21 - 7.13 (m, 2 H), 7.03 (d,  $J$  = 8.5 Hz, 2 H), 6.97 (ddd,  $J$  = 0.9, 7.0, 7.9 Hz, 1 H), 6.57 (dd,  $J$  = 1.2, 2.4 Hz, 1 H), 6.54 (d,  $J$  = 8.5 Hz, 2 H), 5.56 (s, 1 H), 3.49 (br s, 1H), 3.13 (q,  $J$  = 7.2 Hz, 2 H), 1.24 (t,  $J$  = 7.2 Hz, 3 H).

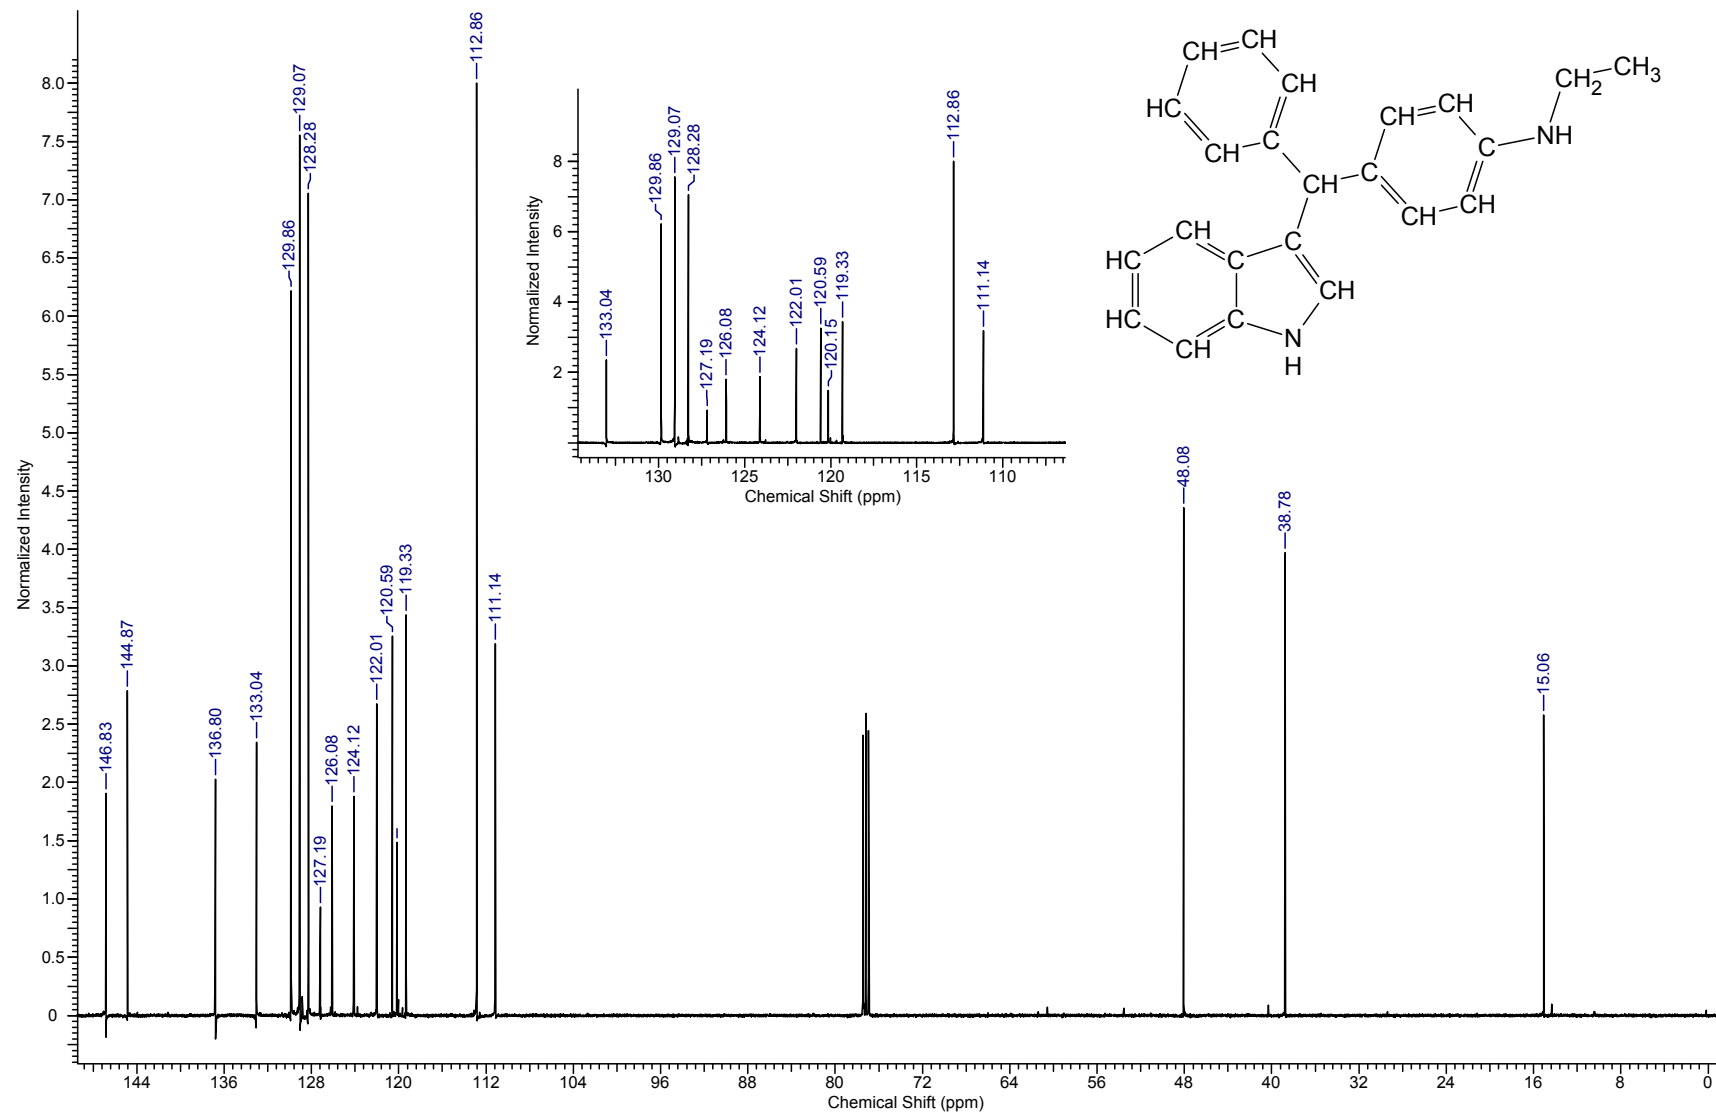

$^{13}\text{C}$  NMR (126 MHz,  $\text{CDCl}_3$ )  $\delta$  = 146.83, 144.87, 136.80, 133.04, 129.86, 129.07, 128.28, 127.19, 126.08, 124.12, 122.01, 120.59, 120.15, 119.33, 112.86, 111.14, 48.08, 38.78, 15.06.

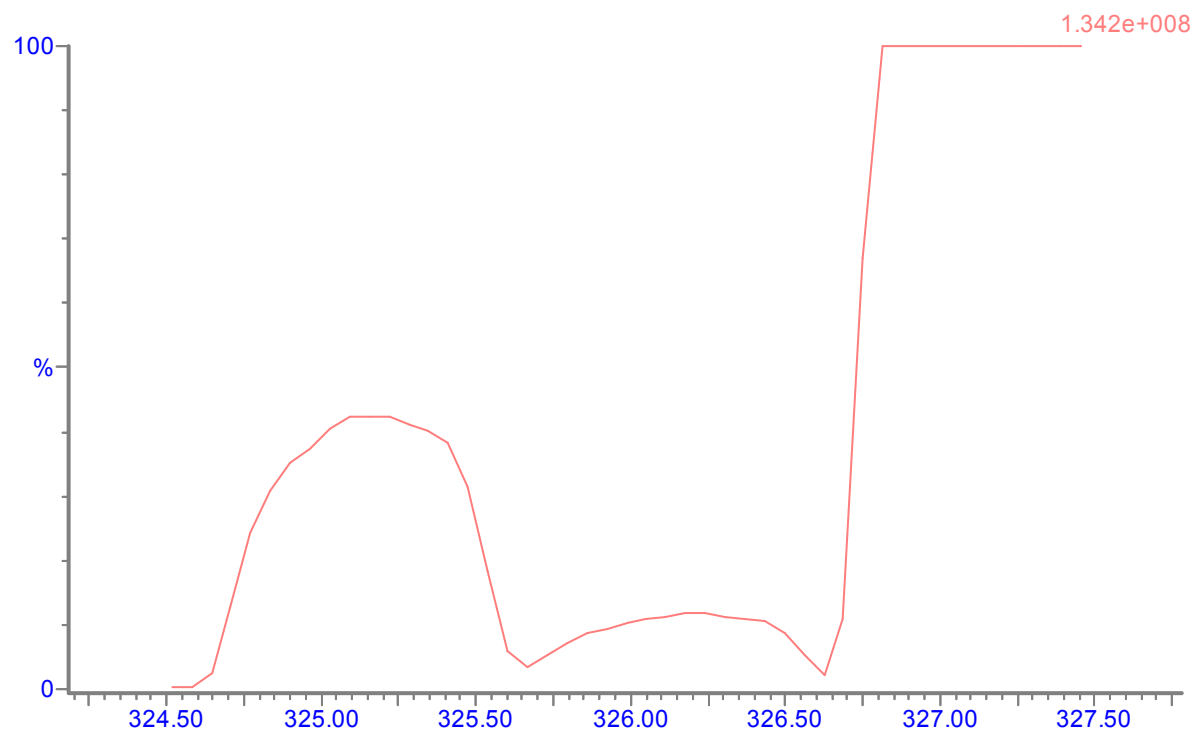

| Formula Mass | Daughter number | Parent m/z | Cone Voltage (V) | Daughters | Collision Energy (eV) | Ion Mode |
|--------------|-----------------|------------|------------------|-----------|-----------------------|----------|
| 326.43       | 1               | 327.14     | 58               | 204.04    | 40                    | ES+      |
|              | 2               | 327.14     | 58               | 295.22    | 42                    | ES+      |
|              | 3               | 327.14     | 58               | 268.16    | 42                    | ES+      |
|              | 4               | 327.14     | 58               | 193.05    | 40                    | ES+      |
|              | 5               | 327.14     | 58               | 247.16    | 30                    | ES+      |

**2.2 4-methylbenzaldehyde (1b) + indole (2a) + N-ethylaniline (3b): (6w) N-ethyl-4-[1H-indol-3-yl(4-methylphenyl)methyl]aniline**

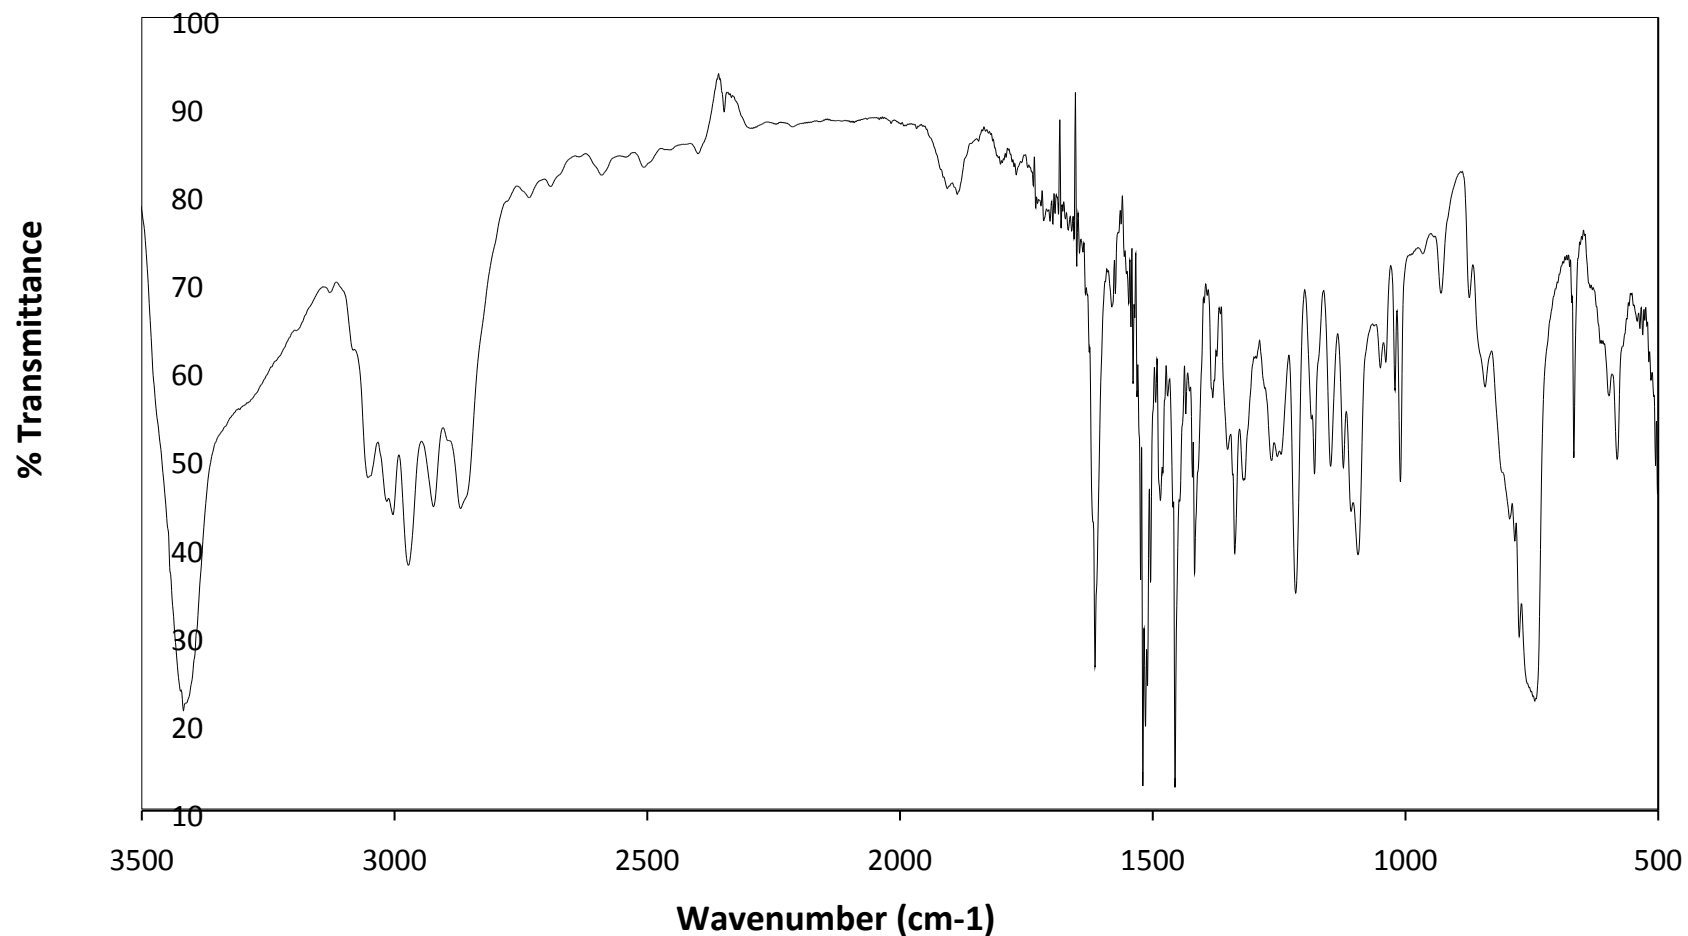

IR (KBr, cm<sup>-1</sup>): 3408 (br, s), 3049 (m), 3007 (m), 2972 (m), 2924 (m), 2868 (m), 1614 (s), 1519 (s), 1456 (s), 1417 (m), 1338 (m), 1251 (m), 1246 (m), 1217 (m), 1180 (m), 1147 (m), 1122 (m), 1093 (m), 1039 (w), 1010 (m), 929 (w), 842 (w), 744 (s), 667 (m).

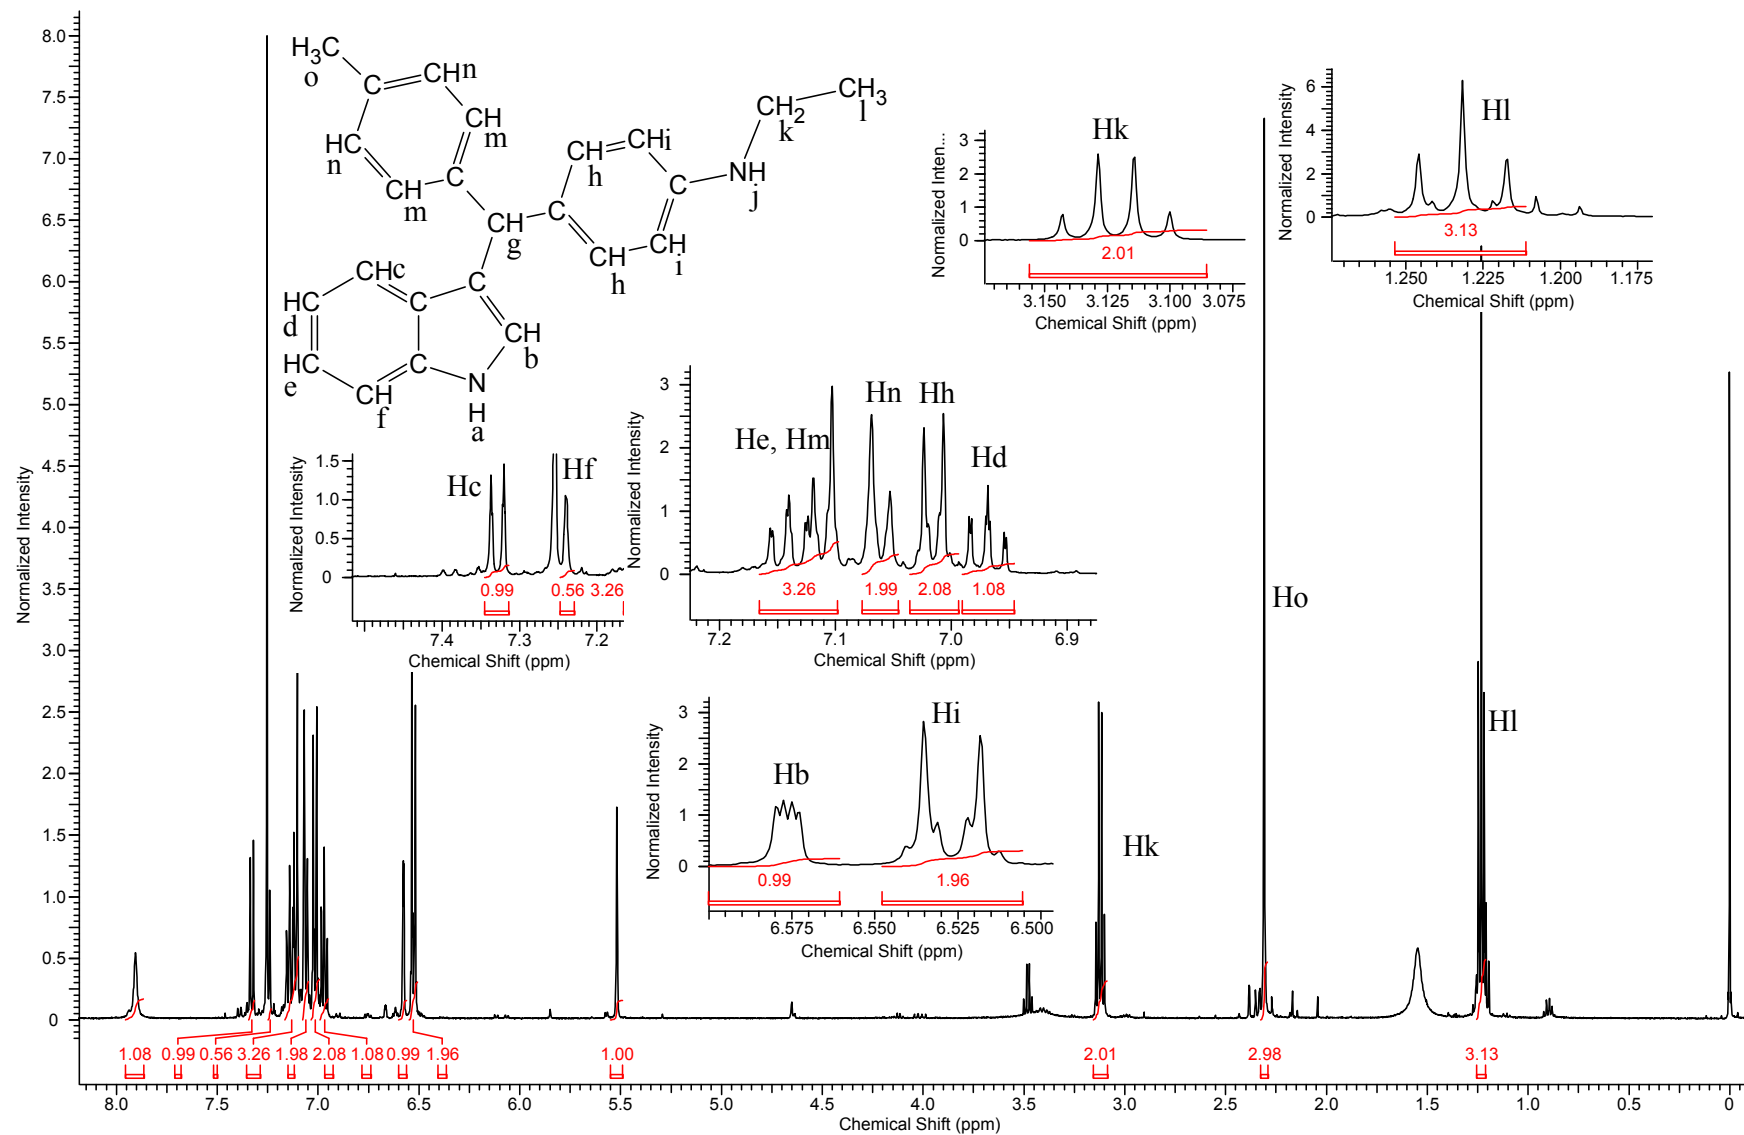

<sup>1</sup>H NMR (500MHz, CDCl<sub>3</sub>)  $\delta$  = 7.91 (br s, 1 H), 7.33 (d,  $J$  = 8.2 Hz, 1 H), 7.24 (d,  $J$  = 7.9 Hz, 1 H), 7.14 (ddd,  $J$  = 0.9, 7.0, 7.7 Hz, 1H), 7.11 (d,  $J$  = 7.9 Hz, 2H), 7.06 (d,  $J$  = 7.9 Hz, 2 H), 7.02 (d,  $J$  = 8.5 Hz, 2H), 6.97 (ddd,  $J$  = 0.9, 7.0, 8.2 Hz, 1 H), 6.58 (dd,  $J$  = 1.2, 2.4 Hz, 1 H), 6.53 (d,  $J$  = 8.5 Hz, 2 H), 5.52 (s, 1 H), 3.12 (q,  $J$  = 7.2 Hz, 2 H), 2.31 (s, 3 H), 1.23 (t,  $J$  = 7.2 Hz, 3 H).



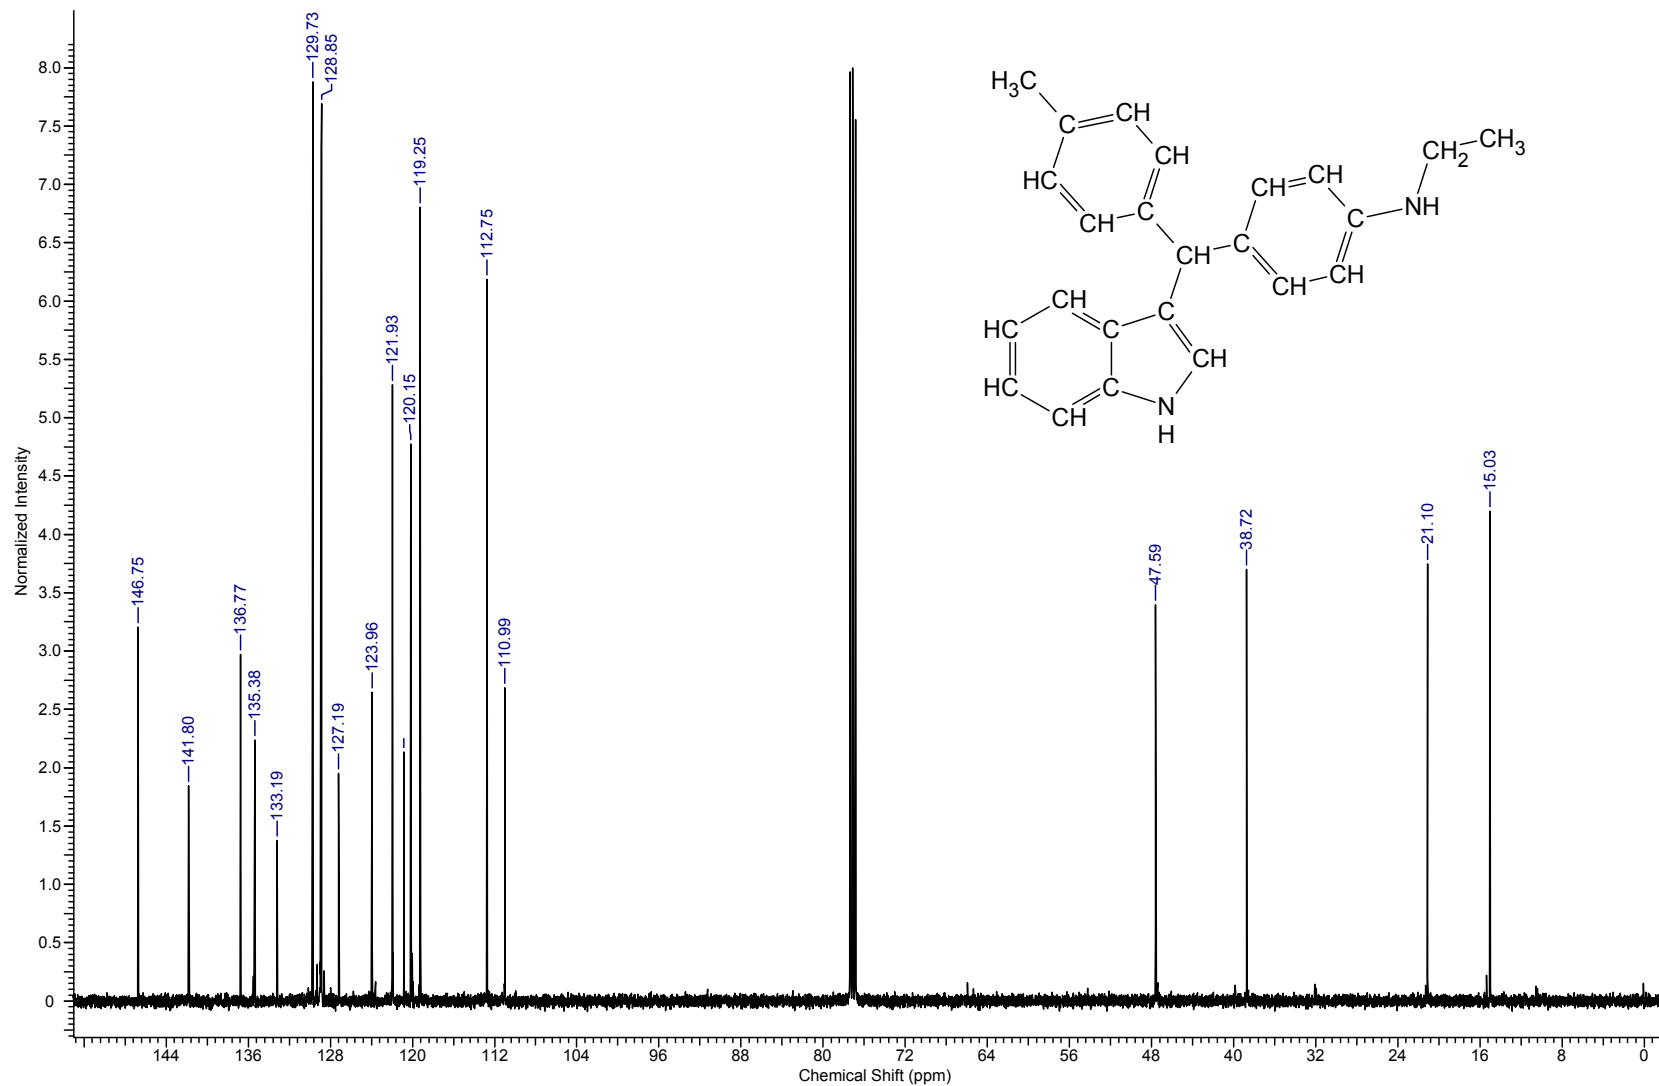

$^{13}\text{C}$  NMR (126 MHz,  $\text{CDCl}_3$ )  $\delta$  = 146.75, 141.80, 136.77, 135.38, 133.19, 129.73, 128.91, 128.85, 127.19, 123.96, 121.93, 120.83, 120.15, 119.25, 112.75, 110.99, 47.59, 38.72, 21.10, 15.03.

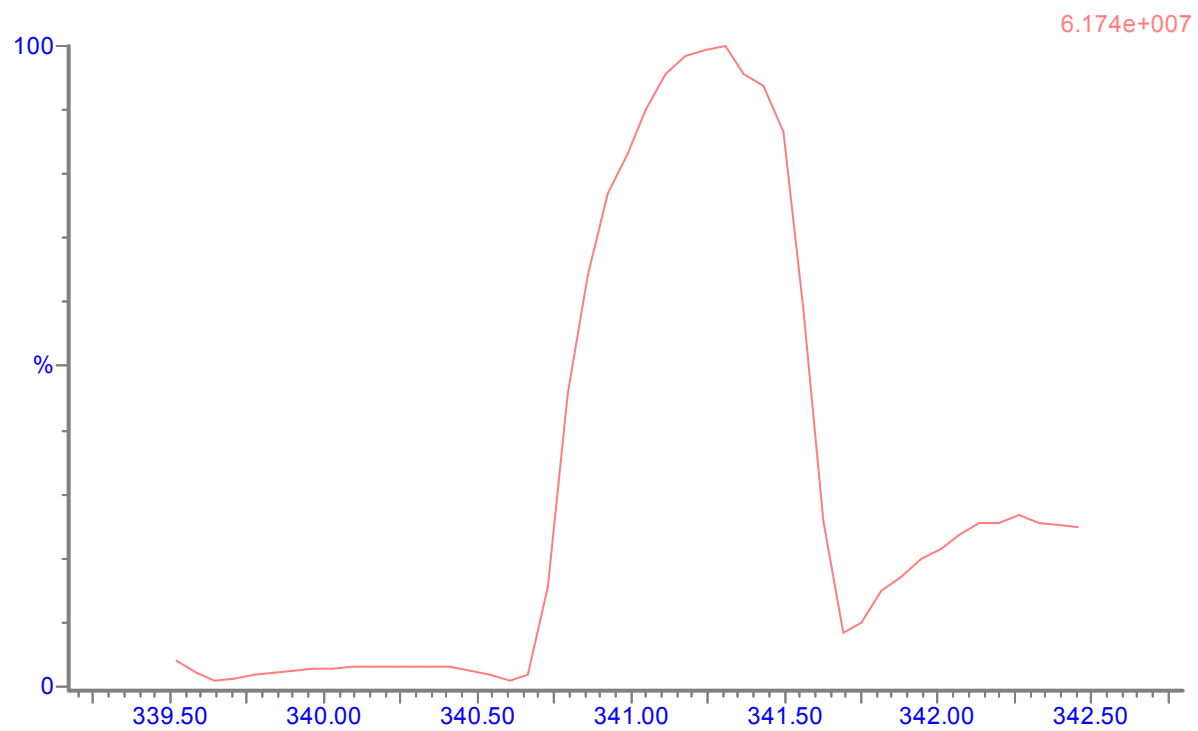

| Formula Mass | Daughter number | Parent m/z | Cone Voltage (V) | Daughters | Collision Energy (eV) | Ion Mode |
|--------------|-----------------|------------|------------------|-----------|-----------------------|----------|
| 340.46       | 1               | 341.22     | 50               | 312.16    | 22                    | ES+      |
|              | 2               | 341.22     | 50               | 220.86    | 38                    | ES+      |
|              | 3               | 341.22     | 50               | 204.14    | 50                    | ES+      |
|              | 4               | 341.22     | 50               | 180.14    | 44                    | ES+      |

**2.3 4-nitrobenzaldehyde (1f) + indole (2a) + N-ethylaniline (3b): (6x) N-ethyl-4-[1H-indol-3-yl(4-nitrophenyl)methyl]aniline**

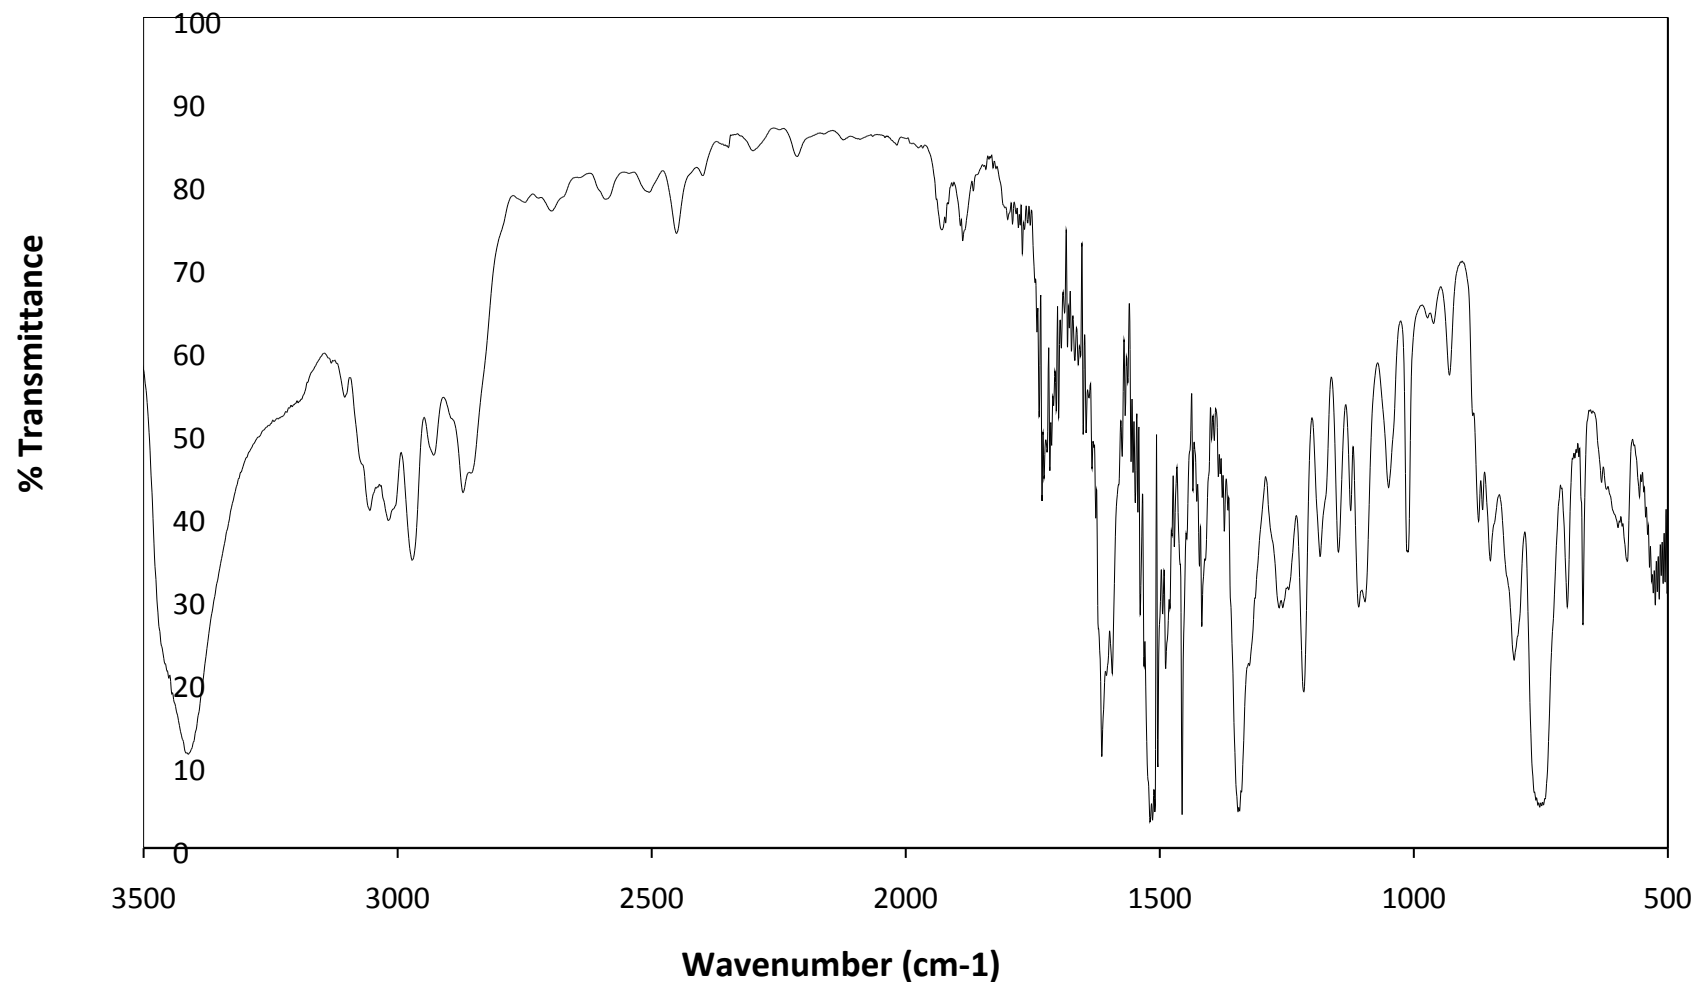

IR (KBr,  $\text{cm}^{-1}$ ): 3410 (br, s), 3105 (m), 3057 (m), 3020 (m), 2972 (m), 2929 (m), 2870 (m), 1732 (m), 1614 (s), 1608 (m), 1519 (s), 1489 (m), 1456 (s), 1417 (m), 1346 (s), 1267 (m), 1217 (m), 1184 (m), 1149 (m), 1109 (m), 1095 (m), 1049 (m), 1010 (m), 929 (w), 848 (w), 802 (m), 748 (s), 698 (m), 667 (m).

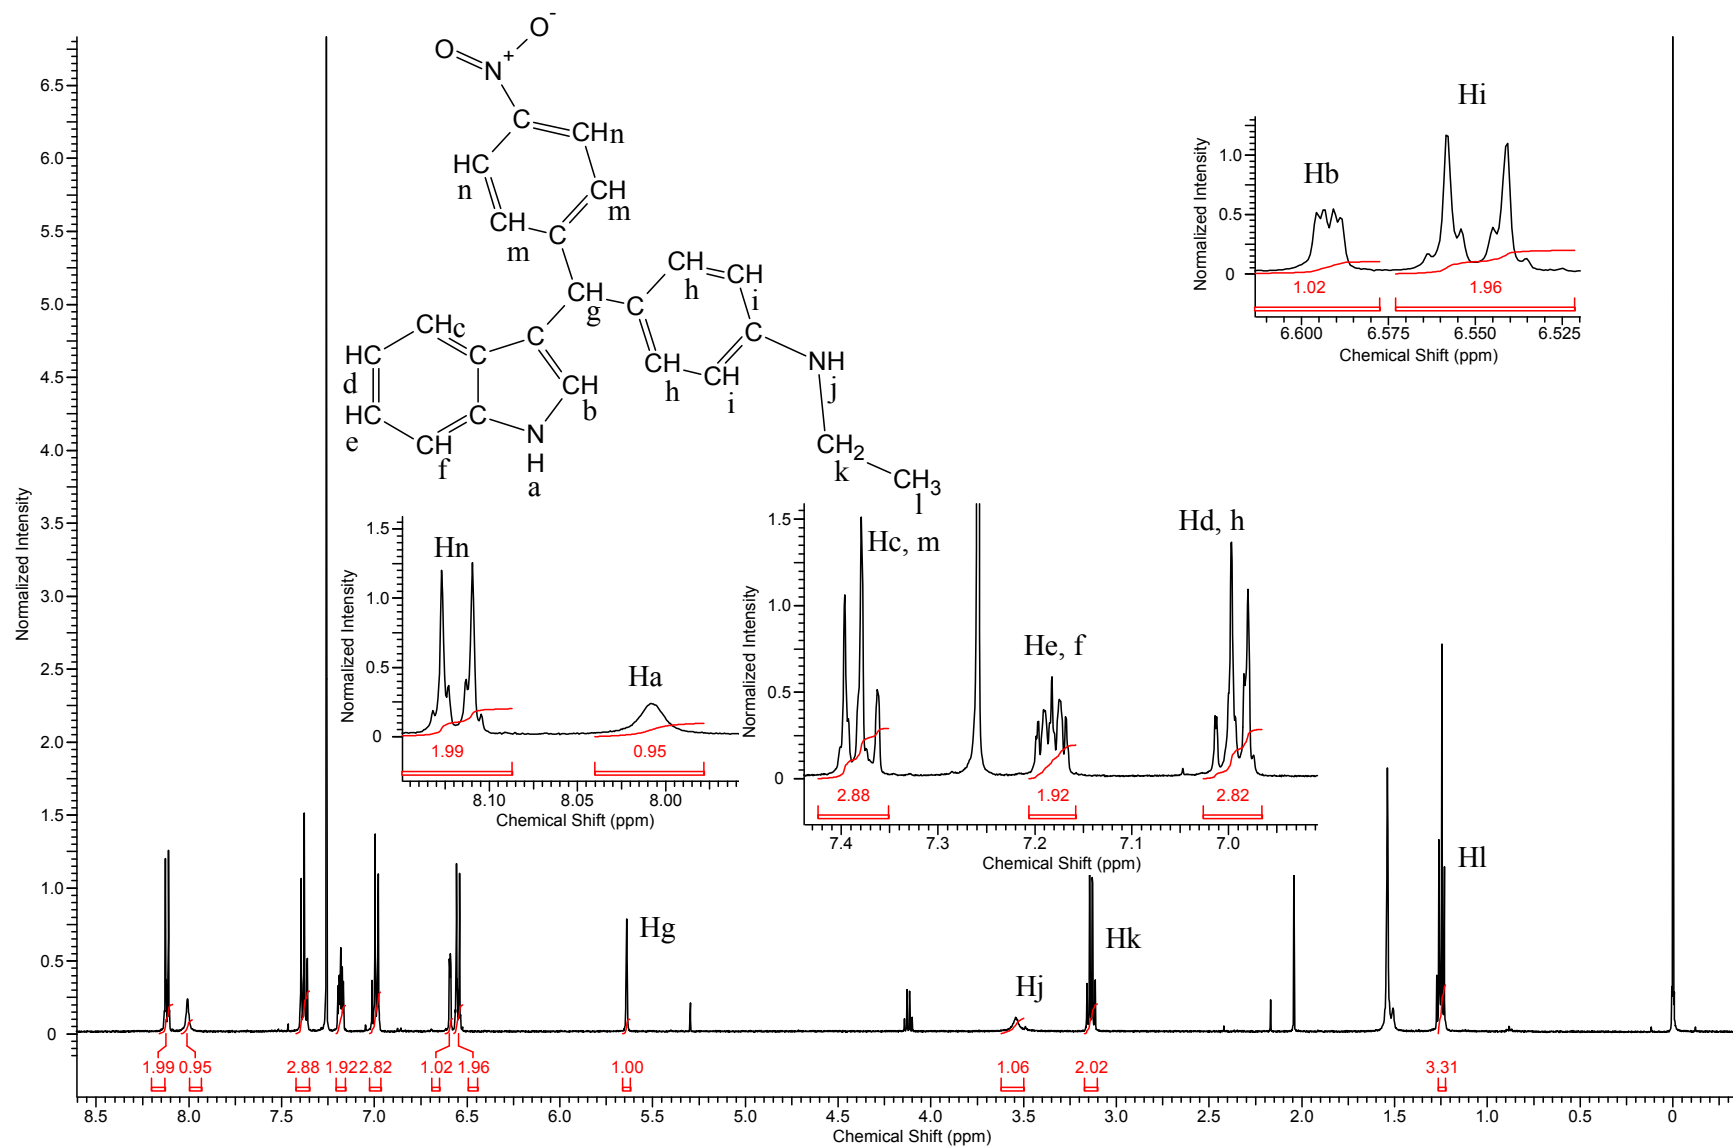

<sup>1</sup>H NMR (500 MHz, CDCl<sub>3</sub>) δ = 8.12 (d, *J* = 8.9 Hz, 2 H), 8.01 (br s, 1 H), 7.42 - 7.35 (m, 3 H), 7.21 - 7.16 (m, 2 H), 7.03 - 6.97 (m, 3 H), 6.59 (dd, *J* = 0.9, 2.4 Hz, 1 H), 6.55 (d, *J* = 8.5 Hz, 2 H), 5.64 (s, 1 H), 3.60 (br s, 1H), 3.14 (q, *J* = 7.2 Hz, 2 H), 1.25 (t, *J* = 7.2 Hz, 3 H).

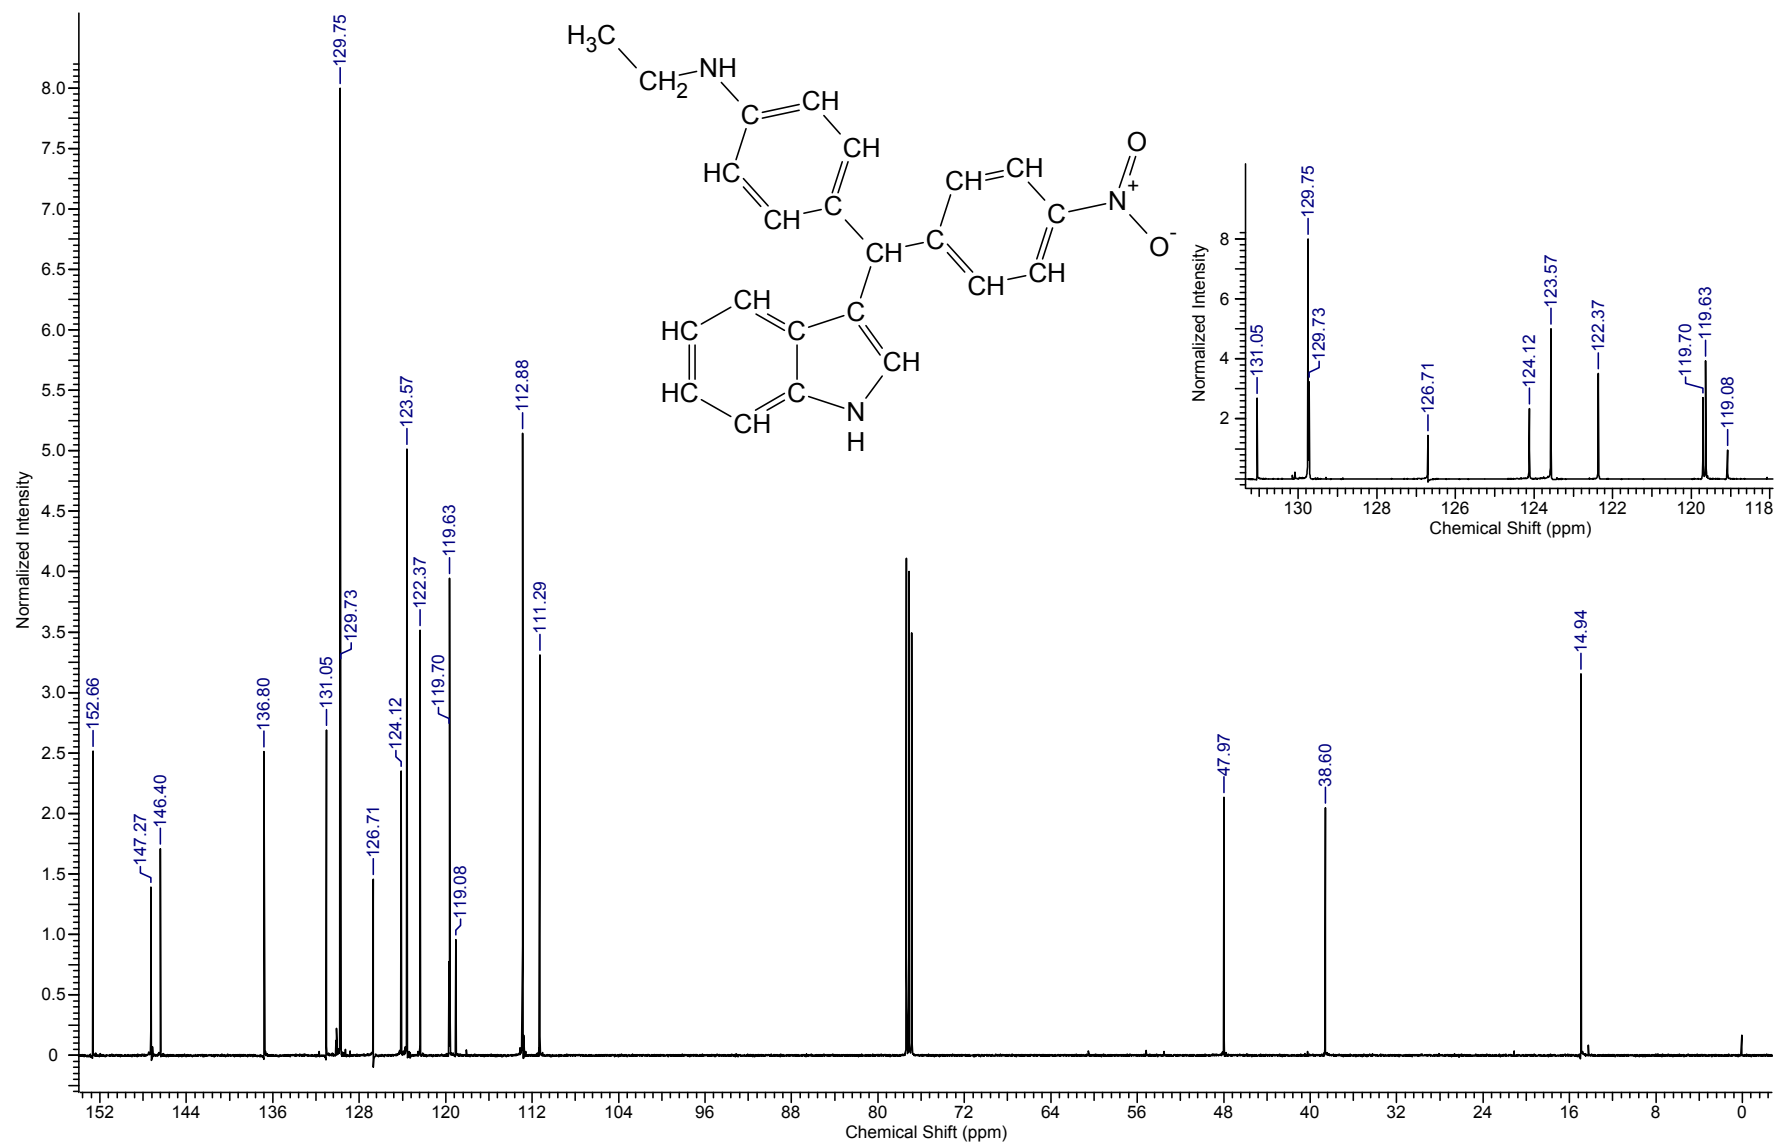

<sup>13</sup>C NMR (126 MHz, CDCl<sub>3</sub>) δ = 152.66, 147.27, 146.40, 136.80, 131.05, 129.75, 129.73, 126.71, 124.12, 123.57, 122.37, 119.70, 119.63, 119.08, 112.88, 111.29, 47.97, 38.60, 14.94.

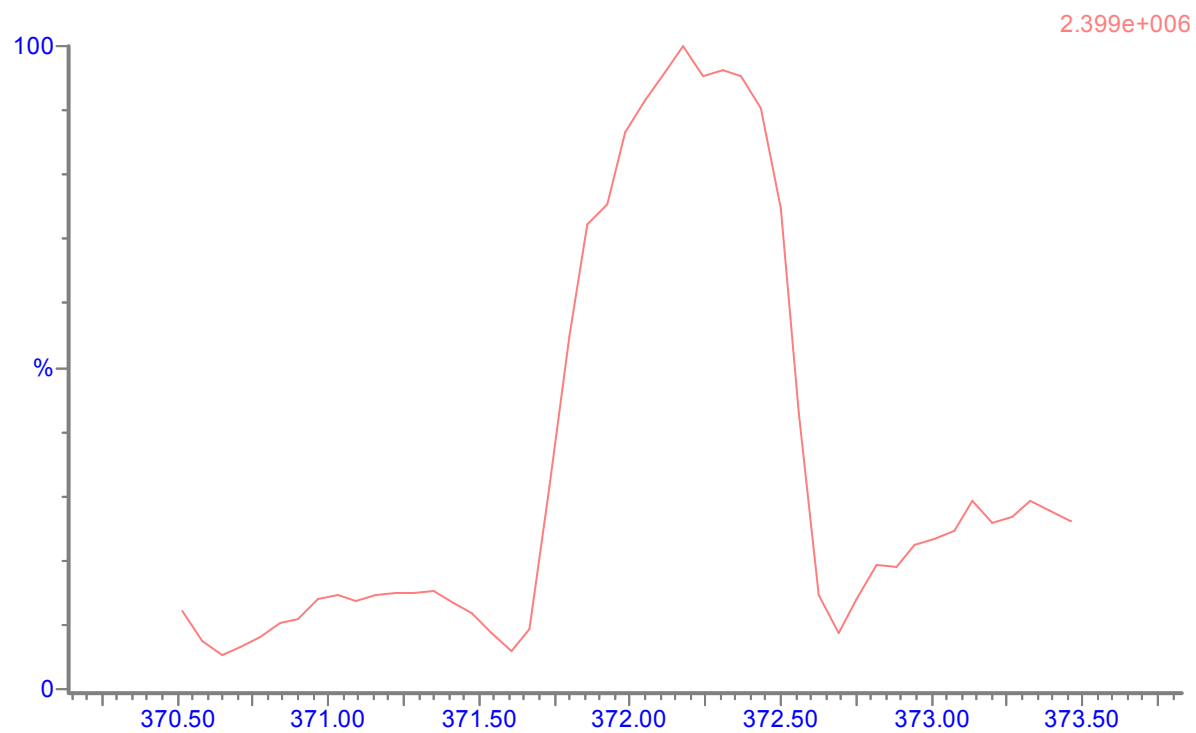

| Formula Mass | Daughter number | Parent m/z | Cone Voltage (V) | Daughters | Collision Energy (eV) | Ion Mode |
|--------------|-----------------|------------|------------------|-----------|-----------------------|----------|
| 371.16       | 1               | 372.16     | 50               | 221.11    | 38                    | ES+      |
|              | 2               | 372.16     | 50               | 343.11    | 22                    | ES+      |
|              | 3               | 372.16     | 50               | 251.09    | 26                    | ES+      |
|              | 4               | 372.16     | 50               | 204.14    | 64                    | ES+      |

**2.4 4-bromobenzaldehyde (1n) + indole (2a) + N-ethylaniline (3b): (6y) N-ethyl-4-[1H-indol-3-yl(4-bromophenyl)methyl]aniline**

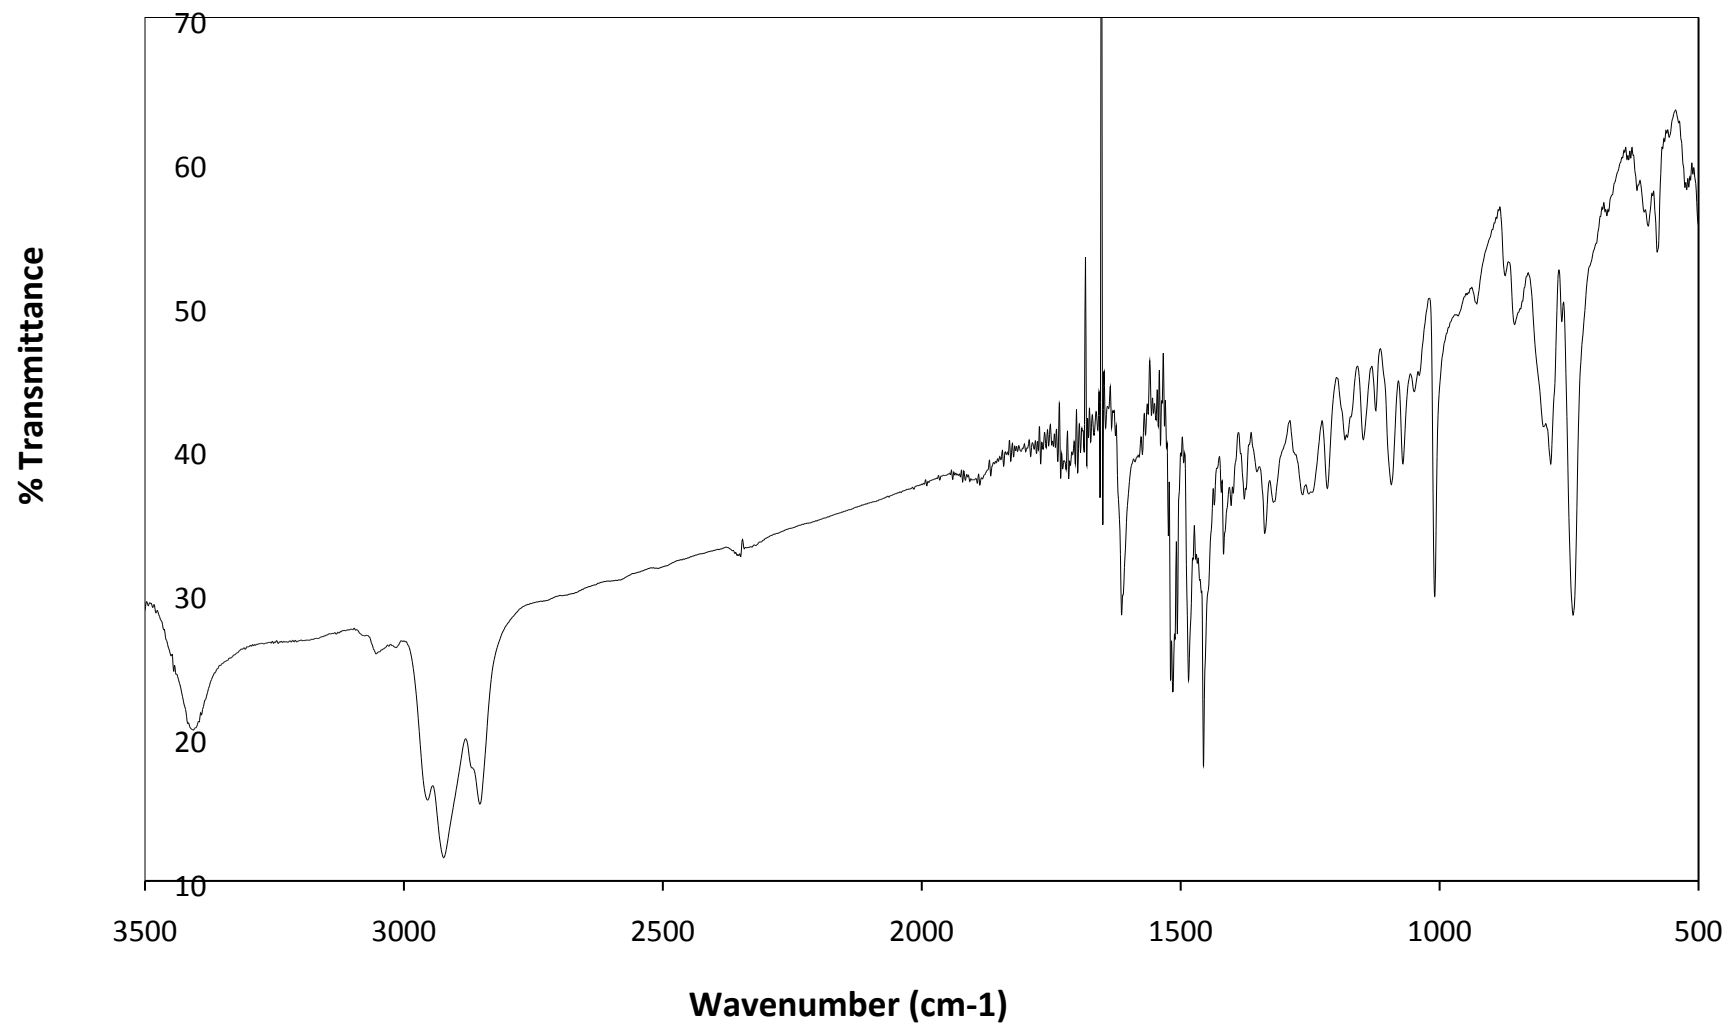

IR (KBr,  $\text{cm}^{-1}$ ): 3406 (br, s), 2953 (s), 2922 (s), 2850 (s), 1614 (s), 1514 (s), 1485 (s), 1456 (s), 1417 (s), 1336 (m), 1317 (m), 1255 (m), 1242 (m), 1176 (m), 1093 (m), 1070 (m), 1010 (m), 854 (w), 785 (m), 742 (m).

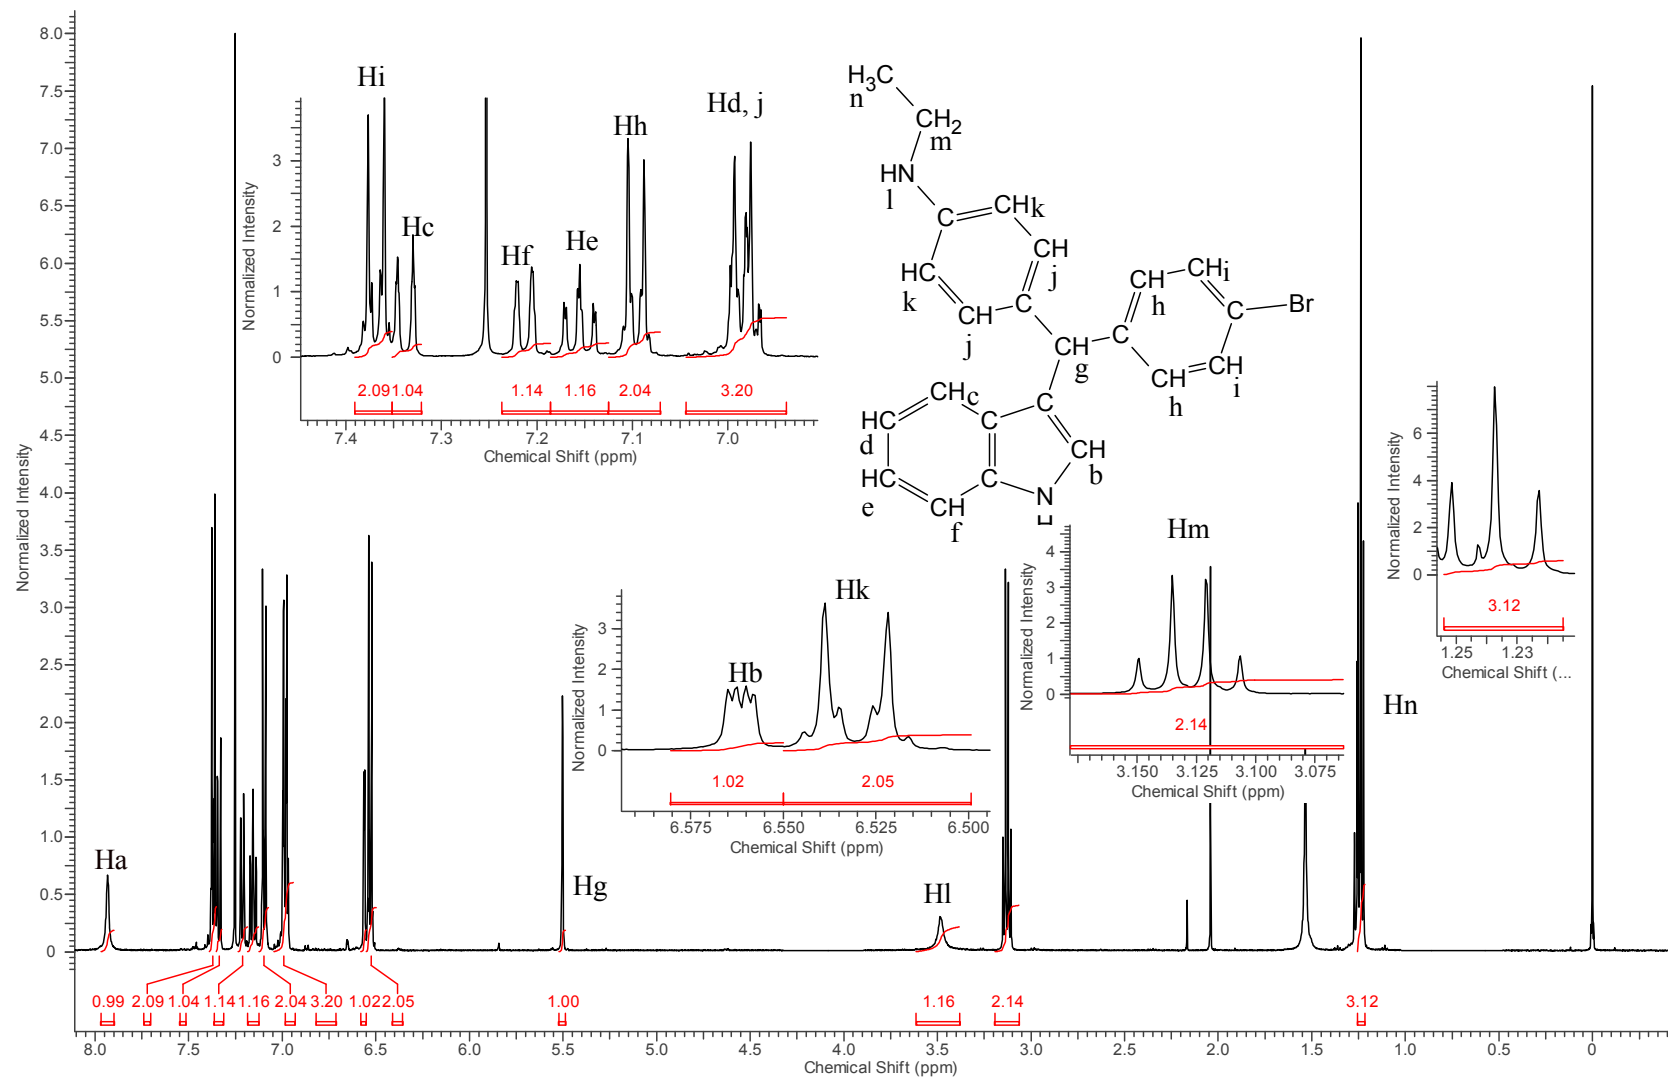

<sup>1</sup>H NMR (500MHz, CDCl<sub>3</sub>) δ = 7.93 (br s, 1 H), 7.37 (d, *J* = 8.2 Hz, 2 H), 7.34 (d, *J* = 8.2 Hz, 1 H), 7.20 (d, *J* = 7.9 Hz, 1 H), 7.16 (ddd, *J* = 1.2, 7.0, 7.9 Hz, 1 H), 7.10 (d, *J* = 8.2 Hz, 2 H), 7.04 - 6.94 (m, 3 H), 6.56 (dd, *J* = 1.1, 2.3 Hz, 1 H), 6.53 (d, *J* = 8.5 Hz, 2 H), 5.50 (s, 1 H), 3.49 (br s, 1 H), 3.13 (q, *J* = 7.2 Hz, 2 H), 1.24 (t, *J* = 7.2 Hz, 3 H).



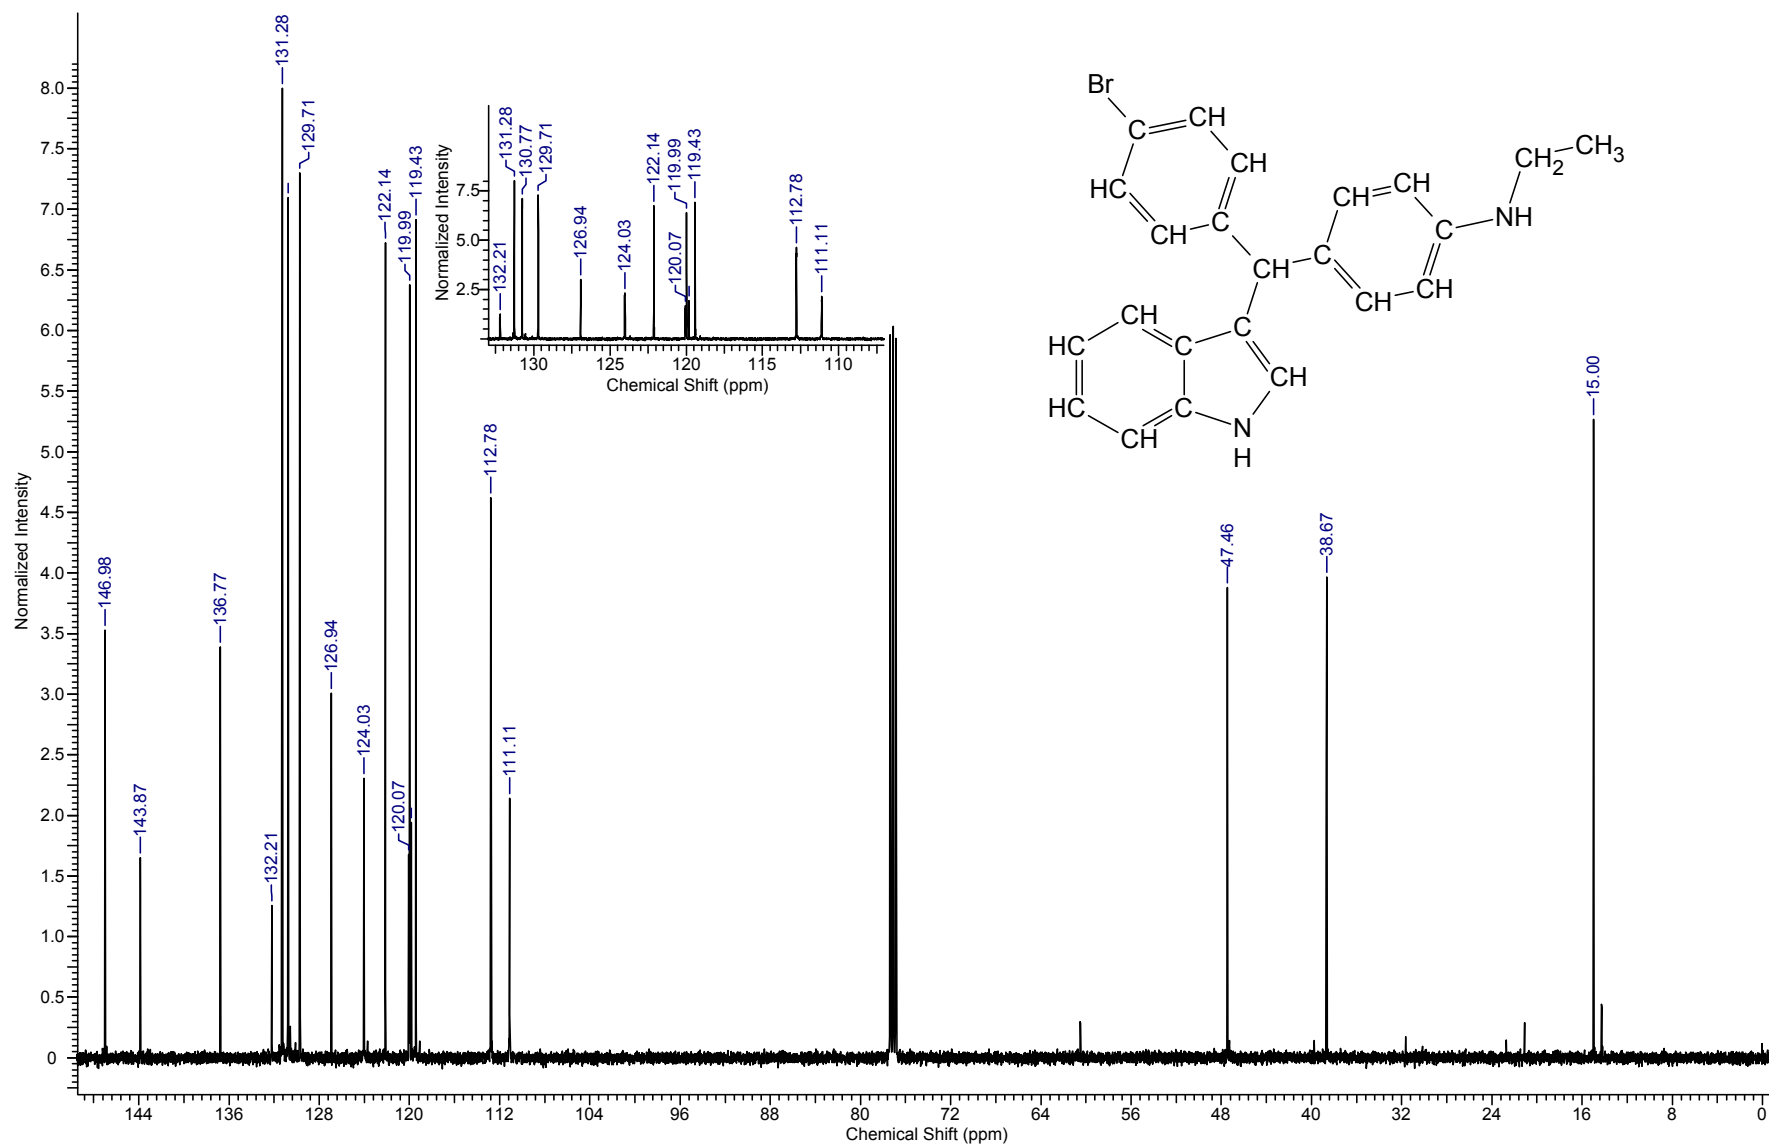

<sup>13</sup>C NMR (126 MHz, CDCl<sub>3</sub>) δ = 146.98, 143.87, 136.77, 132.21, 131.28, 130.77, 129.71, 126.94, 124.03, 122.14, 120.07, 119.99, 119.83, 119.43, 112.78, 111.11, 47.46, 38.67, 15.00.

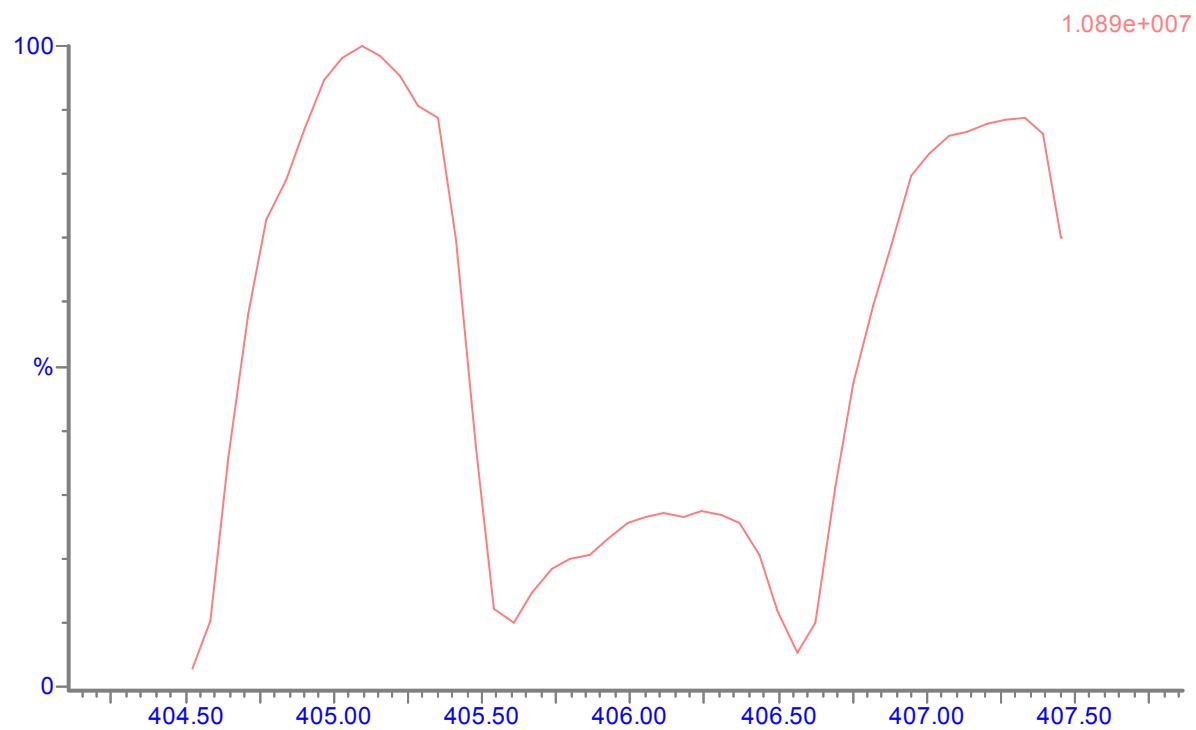

| Formula Mass | Daughter number | Parent m/z | Cone Voltage (V) | Daughters | Collision Energy (eV) | Ion Mode |
|--------------|-----------------|------------|------------------|-----------|-----------------------|----------|
| 405.33       | 1               | 407.07     | 56               | 376.03    | 26                    | ES+      |
|              | 2               | 407.07     | 56               | 221.12    | 42                    | ES+      |
|              | 3               | 407.07     | 56               | 283.95    | 30                    | ES+      |
|              | 4               | 407.07     | 56               | 204.02    | 70                    | ES+      |

2.5 3,4-dichlorobenzaldehyde (1o) + indole (2a) + N-ethylaniline (3b): (6z) N-ethyl-4-[1H-indol-3-yl(3,4-dichlorophenyl)methyl]aniline

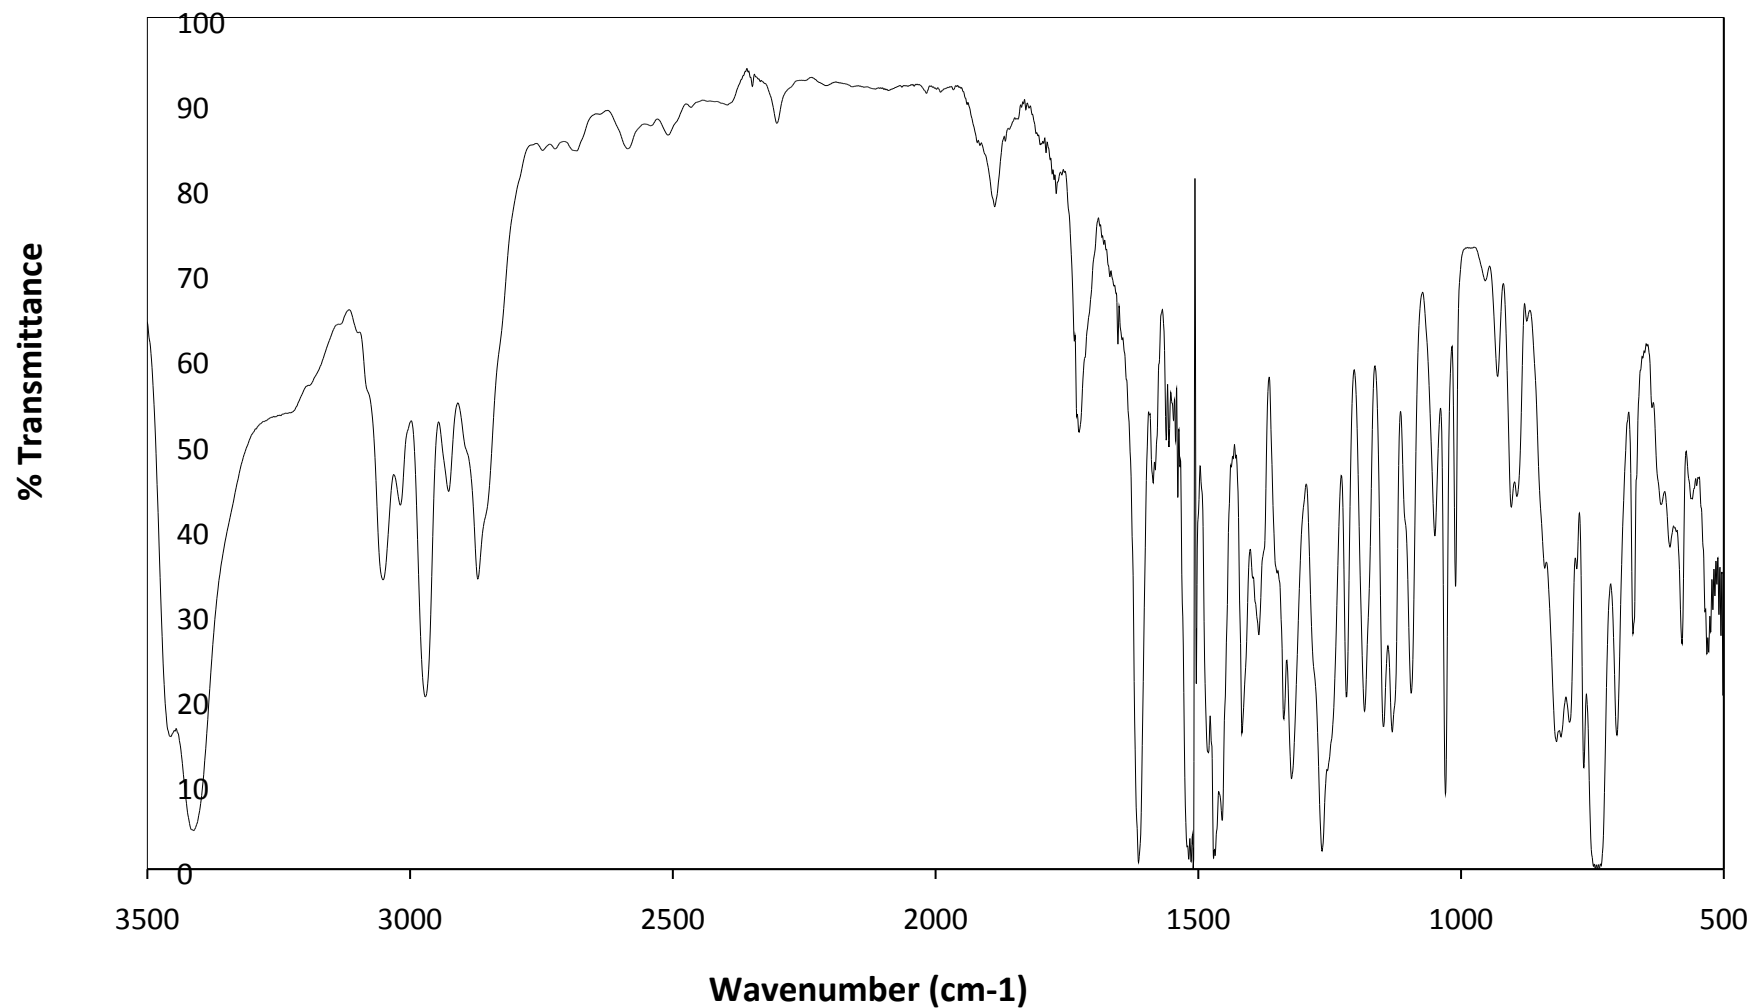

IR (KBr, cm<sup>-1</sup>): 3454 (s), 3410 (s), 3223 (w), 3049 (m), 3018 (m), 2970 (m), 2926 (m), 2870 (m), 1726 (m), 1614 (s), 1514 (s), 1467 (s), 1454 (s), 1415 (s), 1384 (m), 1323 (s), 1265 (s), 1217 (m), 1184 (m), 1147 (m), 1130 (m), 1095 (m), 1049 (w), 1029 (s), 1010 (w), 904 (w), 817 (s), 792 (s), 732 (s), 704 (s), 673 (m).

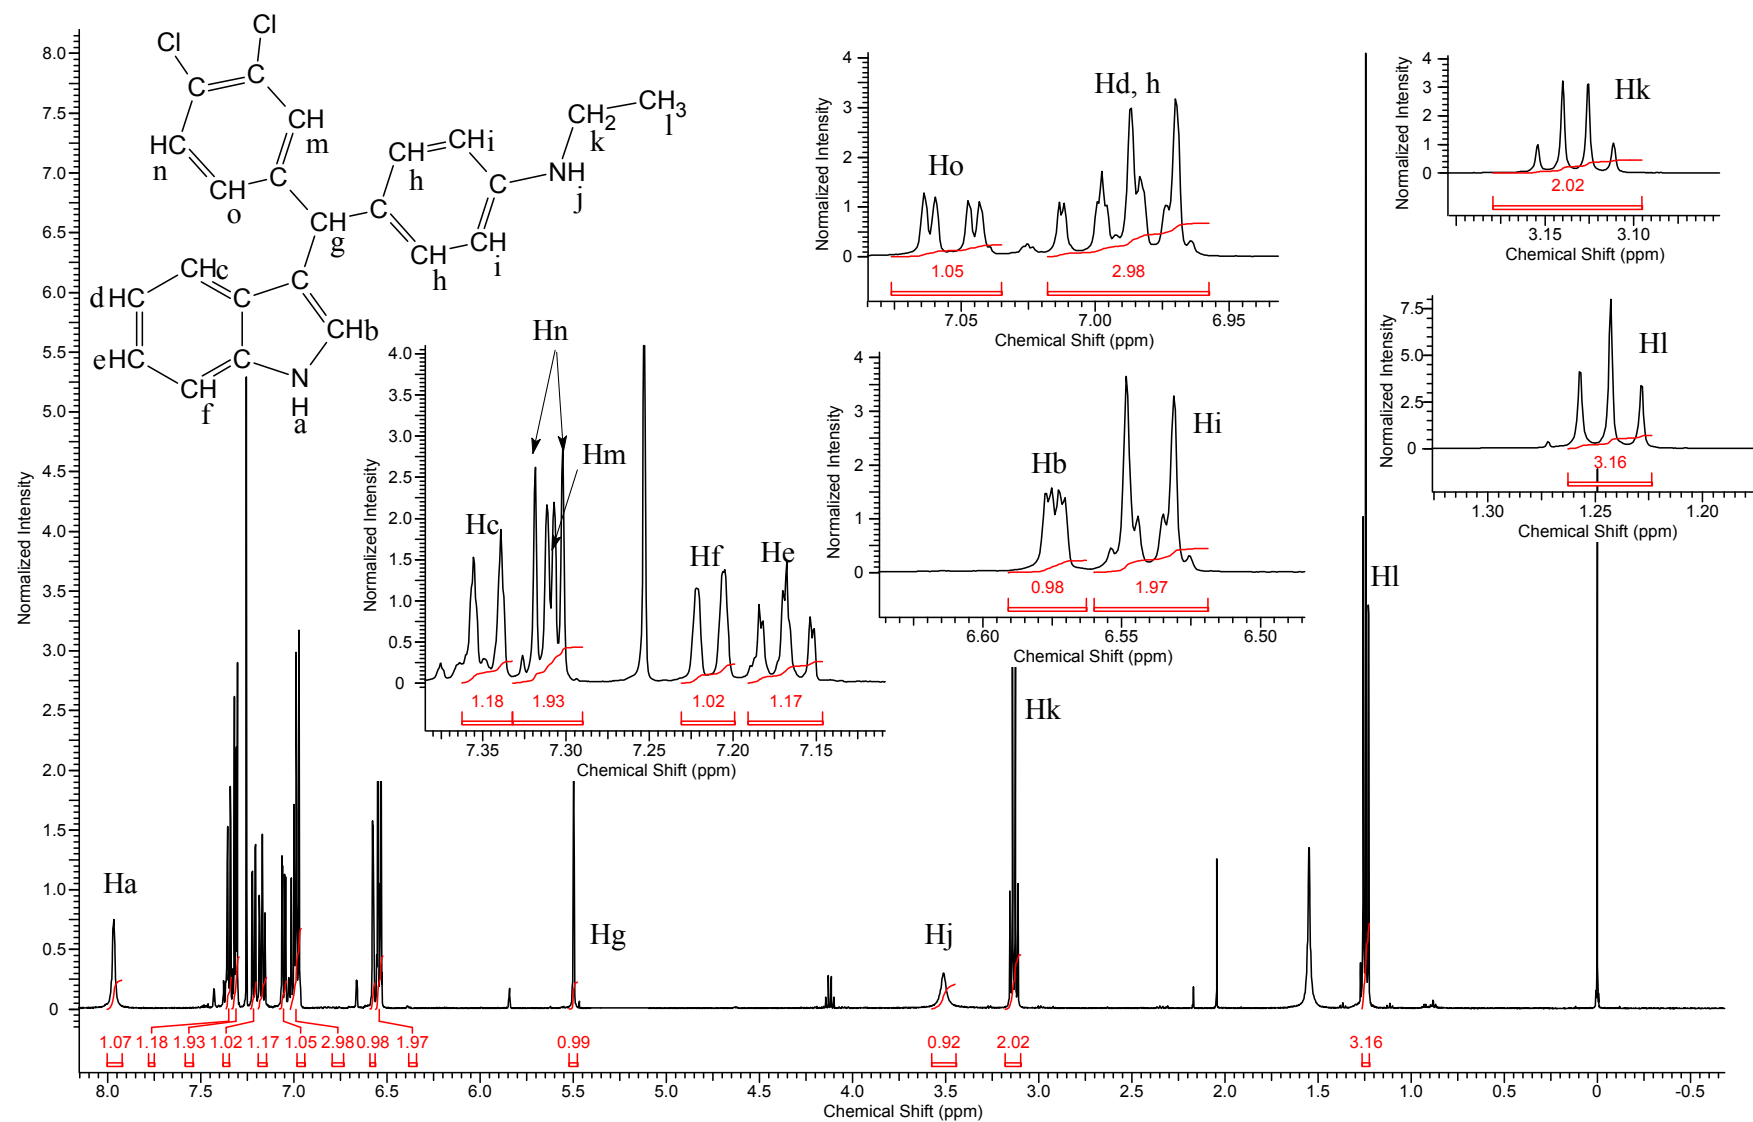

<sup>1</sup>H NMR (500MHz, CDCl<sub>3</sub>) δ = 7.97 (br s, 1 H), 7.35 (d, *J* = 8.2 Hz, 1 H), 7.31 (d, *J* = 8.2 Hz, 1H), 7.31 (d, *J* = 2.1 Hz, 1H), 7.21 (d, *J* = 7.9 Hz, 1 H), 7.17 (ddd, *J* = 1.2 Hz, 7.0, 7.9 Hz, 1 H), 7.05 (dd, *J* = 2.1, 8.2 Hz, 1 H), 7.02 - 6.96 (m, 3 H), 6.57 (dd, *J* = 1.1, 2.3 Hz, 1 H), 6.54 (d, *J* = 8.5 Hz, 2 H), 5.50 (s, 1 H), 3.51 (br s, 1 H), 3.13 (q, *J* = 7.2 Hz, 2 H), 1.24 (t, *J* = 7.2 Hz, 3 H).

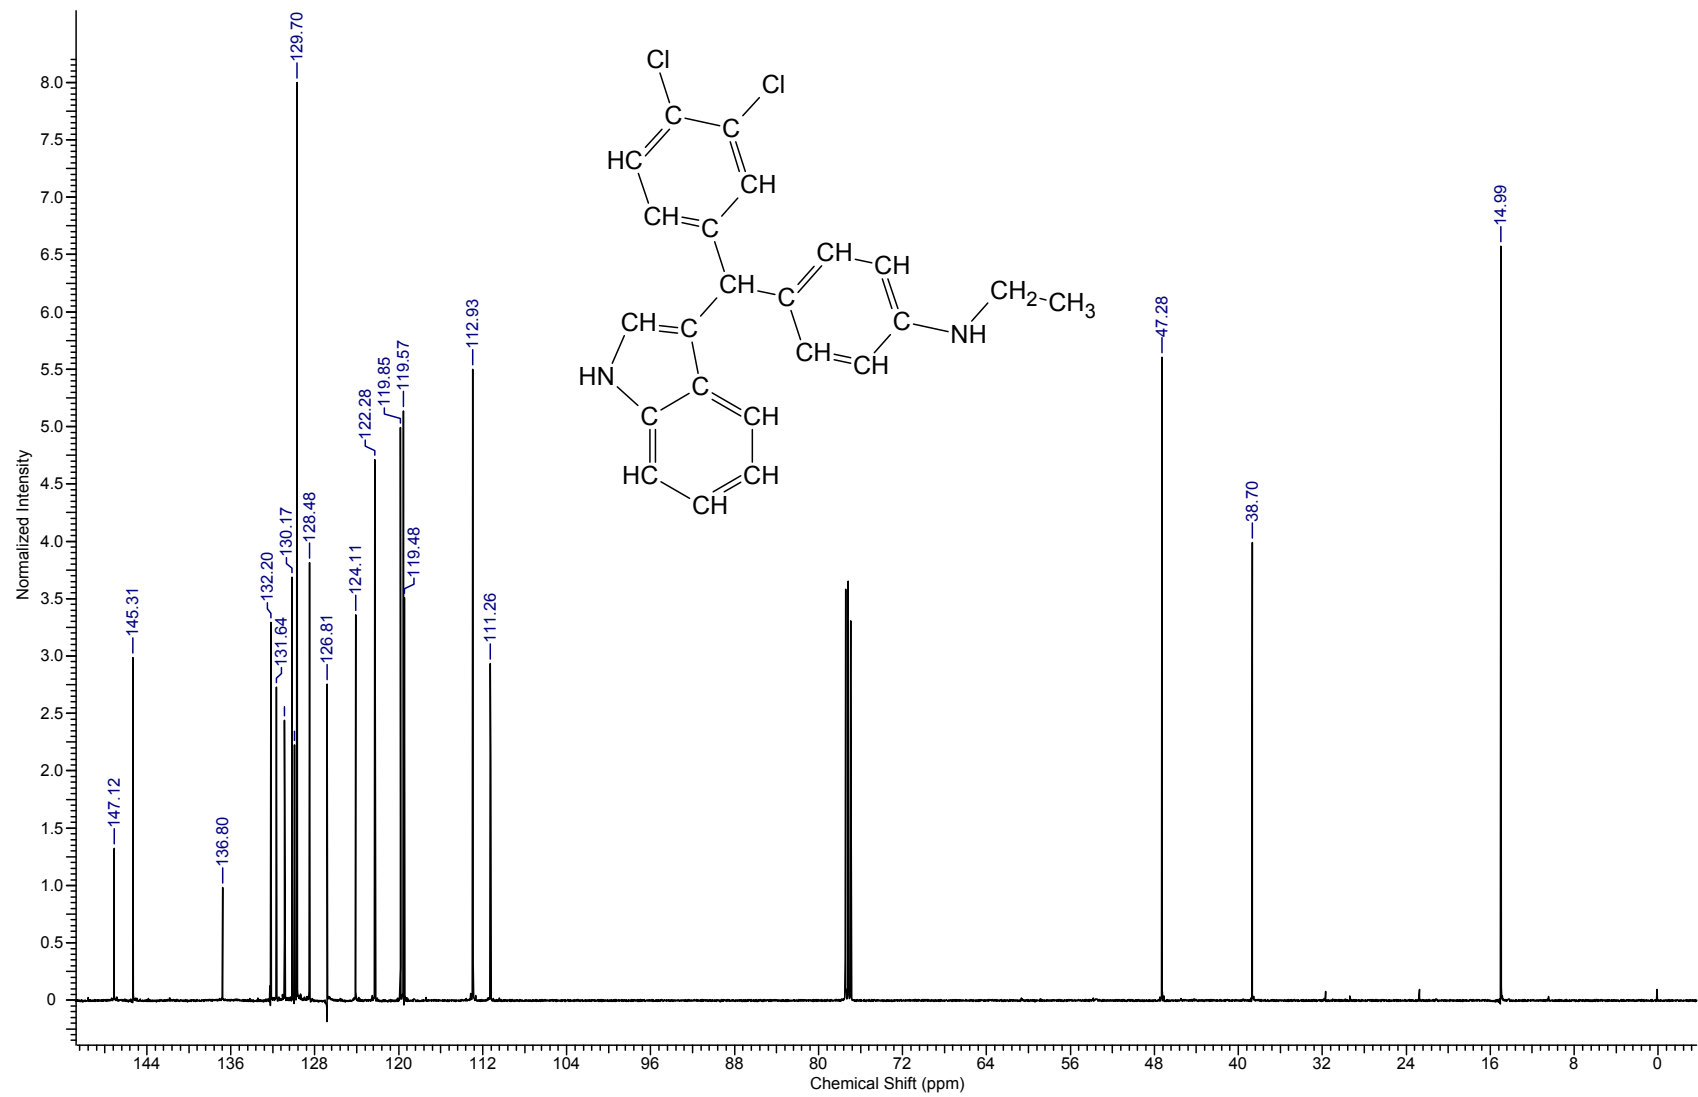

<sup>13</sup>C NMR (126 MHz, CDCl<sub>3</sub>) δ = 147.13, 145.32, 136.80, 132.20, 131.64, 130.87, 130.17, 129.94, 129.71, 128.48, 126.81, 124.11, 122.28, 119.85, 119.57, 119.48, 112.93, 111.26, 47.28, 38.70, 14.99.

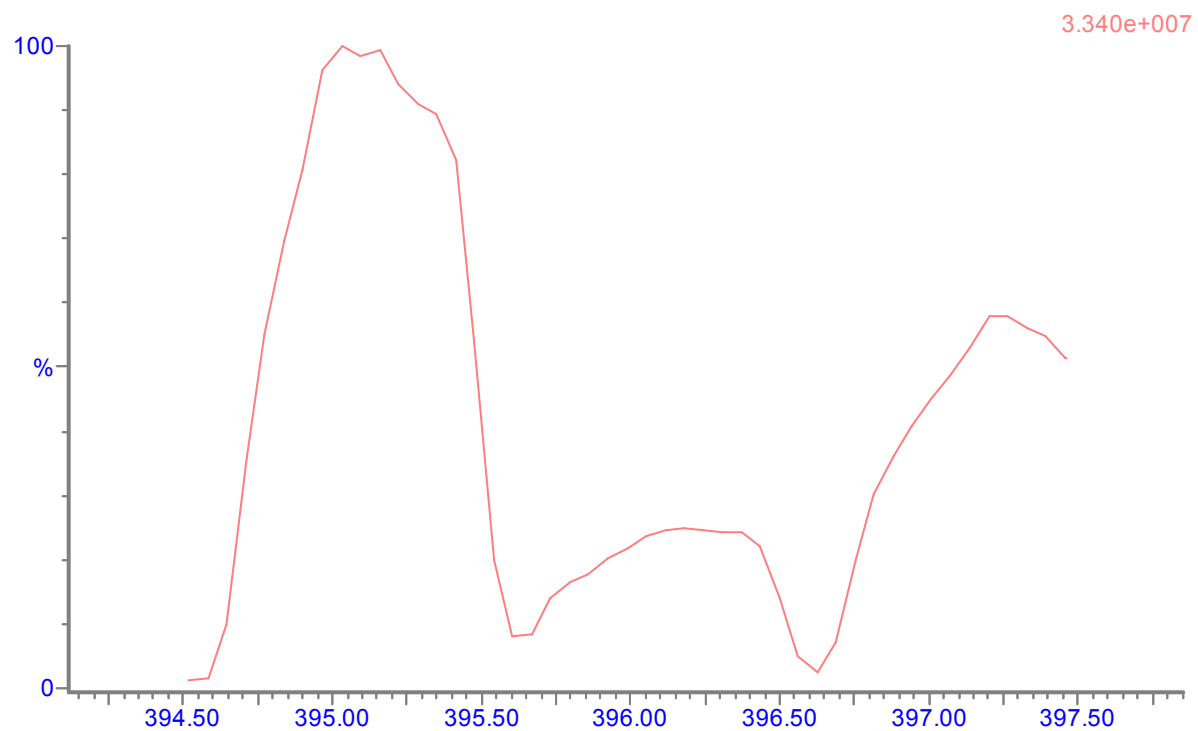

| Formula Mass | Daughter Number | Parent m/z | Cone Voltage (V) | Daughters | Collision Energy (eV) | Ion Mode |
|--------------|-----------------|------------|------------------|-----------|-----------------------|----------|
| 395.32       | 1               | 397.14     | 42               | 221.13    | 36                    | ES+      |
|              | 2               | 397.14     | 42               | 366.09    | 26                    | ES+      |
|              | 3               | 397.14     | 42               | 274.00    | 28                    | ES+      |
|              | 4               | 397.14     | 42               | 204.03    | 62                    | ES+      |
|              | 5               | 397.14     | 42               | 238.10    | 42                    | ES+      |

### [3] Primary Amines

#### 3.1 Benzaldehyde (1a) + indole (2a) + aniline (3e): (6aa) 4-[1H-indol-3-yl(phenyl)methyl]aniline

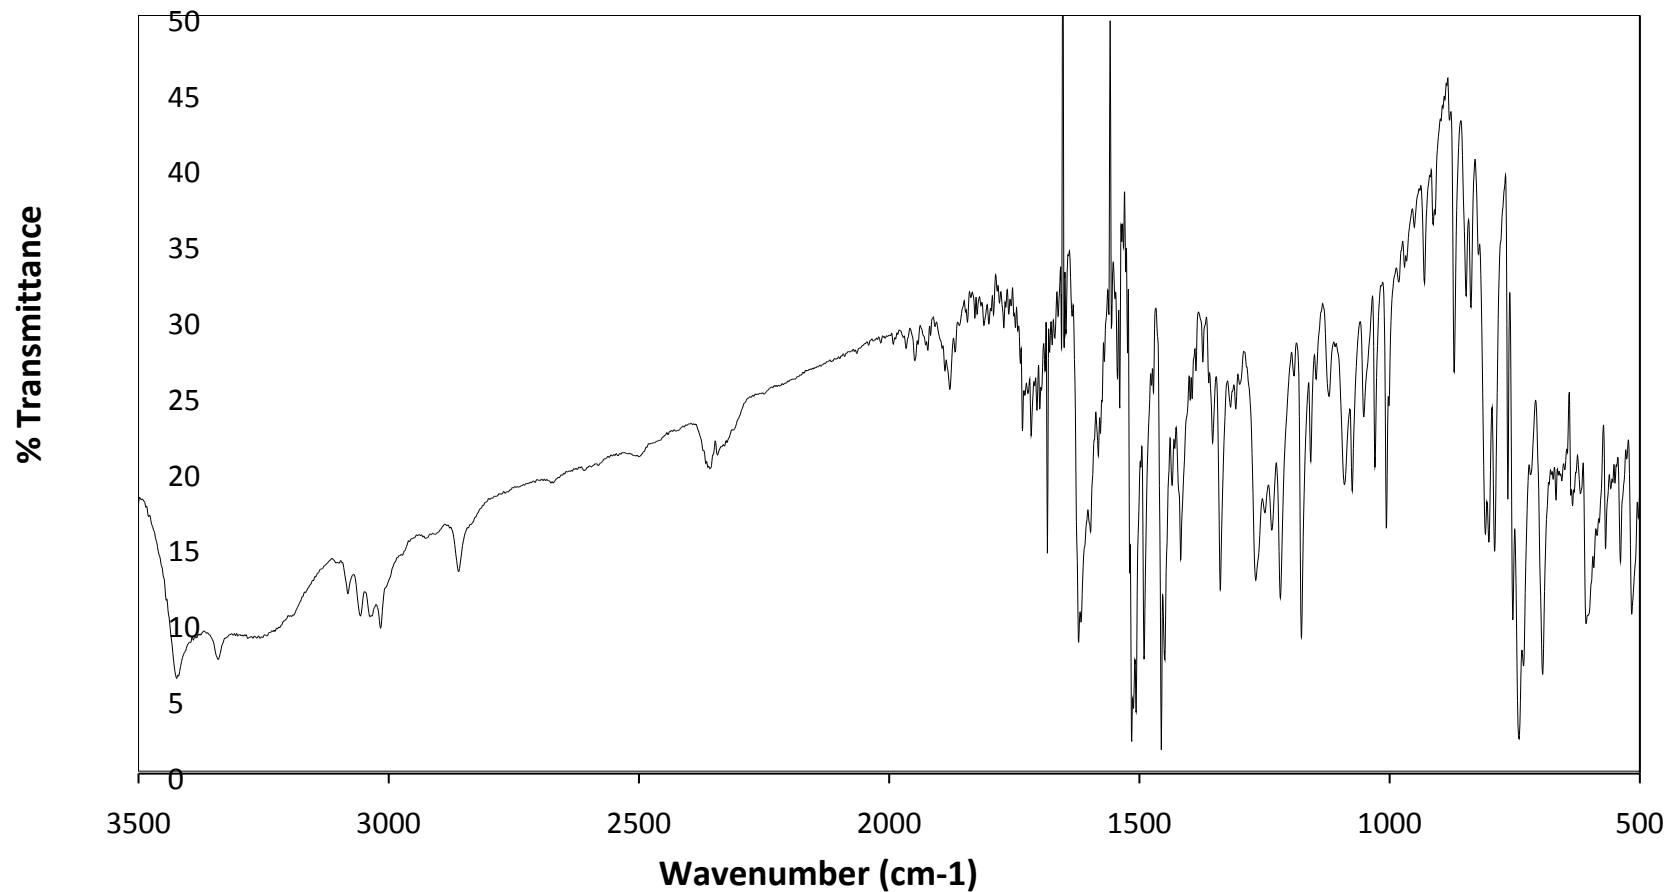

IR (KBr, cm<sup>-1</sup>): 3423 (s), 3342 (s), 3251 (s), 3080 (m), 3057 (m), 3034 (m), 3016 (m), 2860 (m), 1683 (m), 1622 (m), 1516 (s), 1490 (s), 1456 (s), 1417 (m), 1338 (m), 1267 (m), 1234 (m), 1176 (m), 1157 (m), 1120 (m), 1089 (m), 1074 (m), 1051 (m), 1029 (m), 1006 (m), 929 (w), 871 (w), 846 (w), 837 (w), 808 (m), 802 (m), 790 (m), 742 (s), 694 (s), 607 (m).

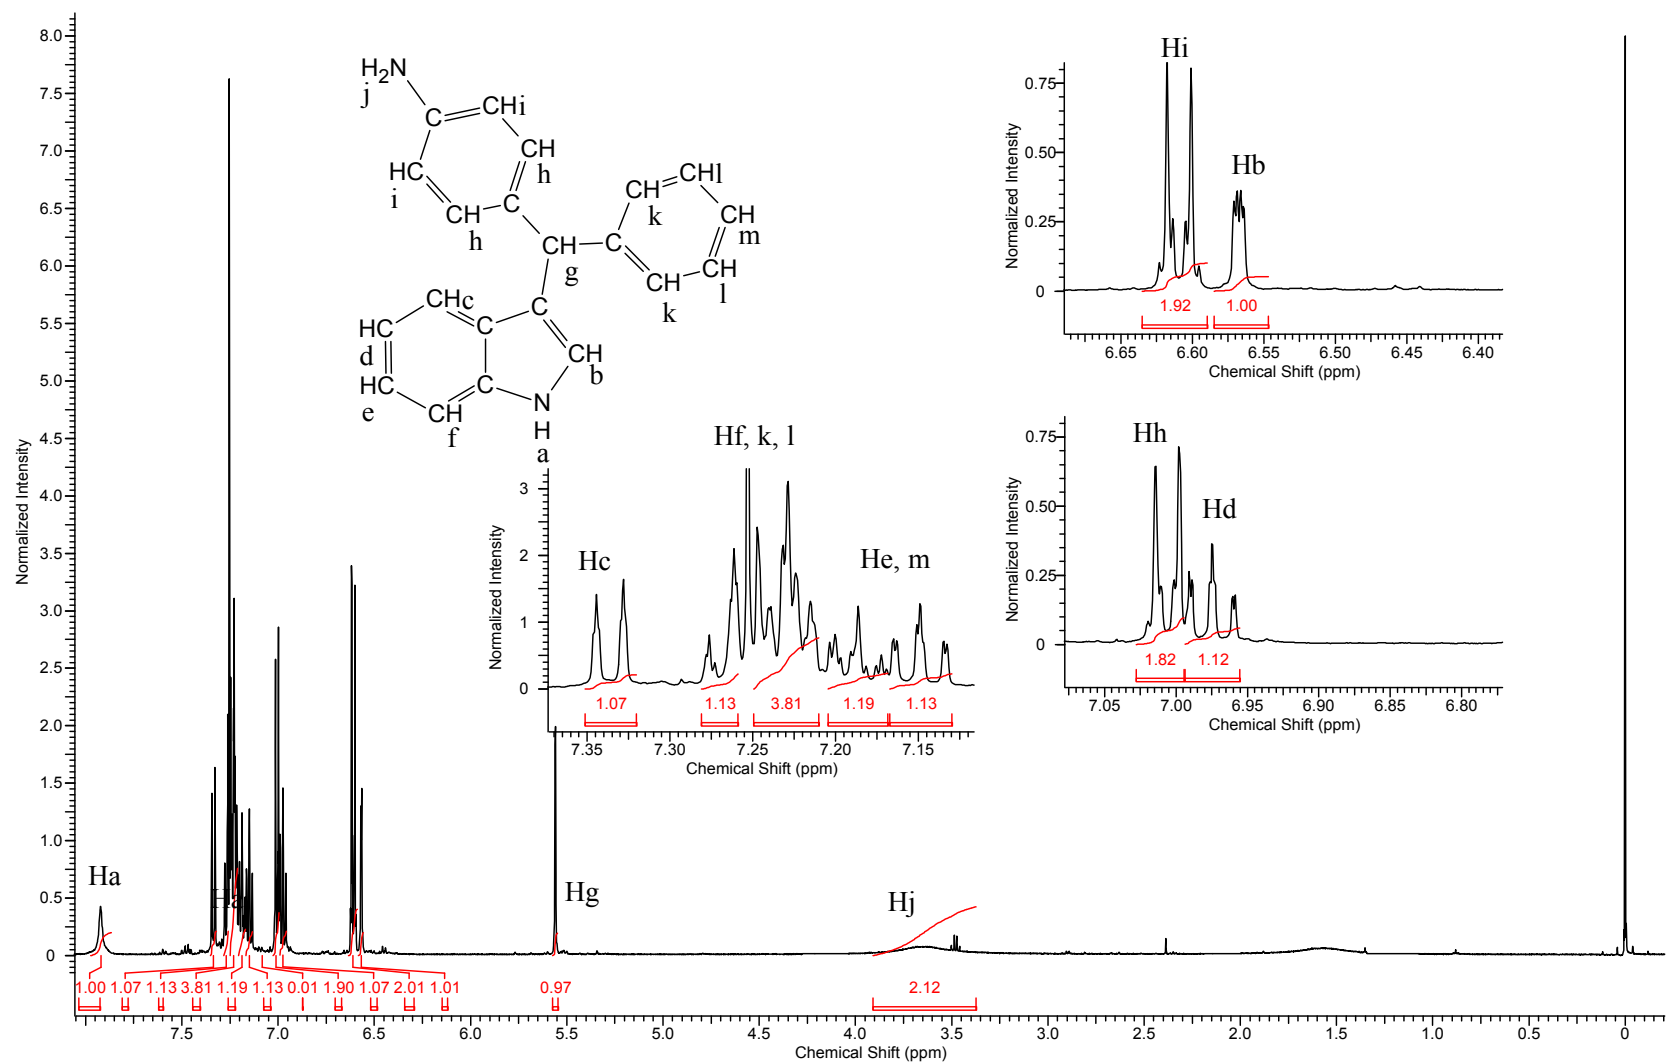

<sup>1</sup>H NMR (500MHz, CDCl<sub>3</sub>)  $\delta$  = 7.92 (br s, 1H), 7.34 (d,  $J$  = 8.2 Hz, 1 H), 7.28 - 7.26 (m, 1 H), 7.25 - 7.21 (m, 4 H), 7.21 - 7.17 (m, 1 H), 7.17 - 7.13 (m, 1 H), 7.00 (d,  $J$  = 8.5 Hz, 2 H), 6.97 (ddd,  $J$  = 0.7, 7.0, 8.2 Hz, 1 H), 6.61 (d,  $J$  = 8.5 Hz, 2 H), 6.57 (dd,  $J$  = 1.1, 2.3 Hz, 1 H), 5.56 (s, 1 H), 3.71 (br s, 2H).



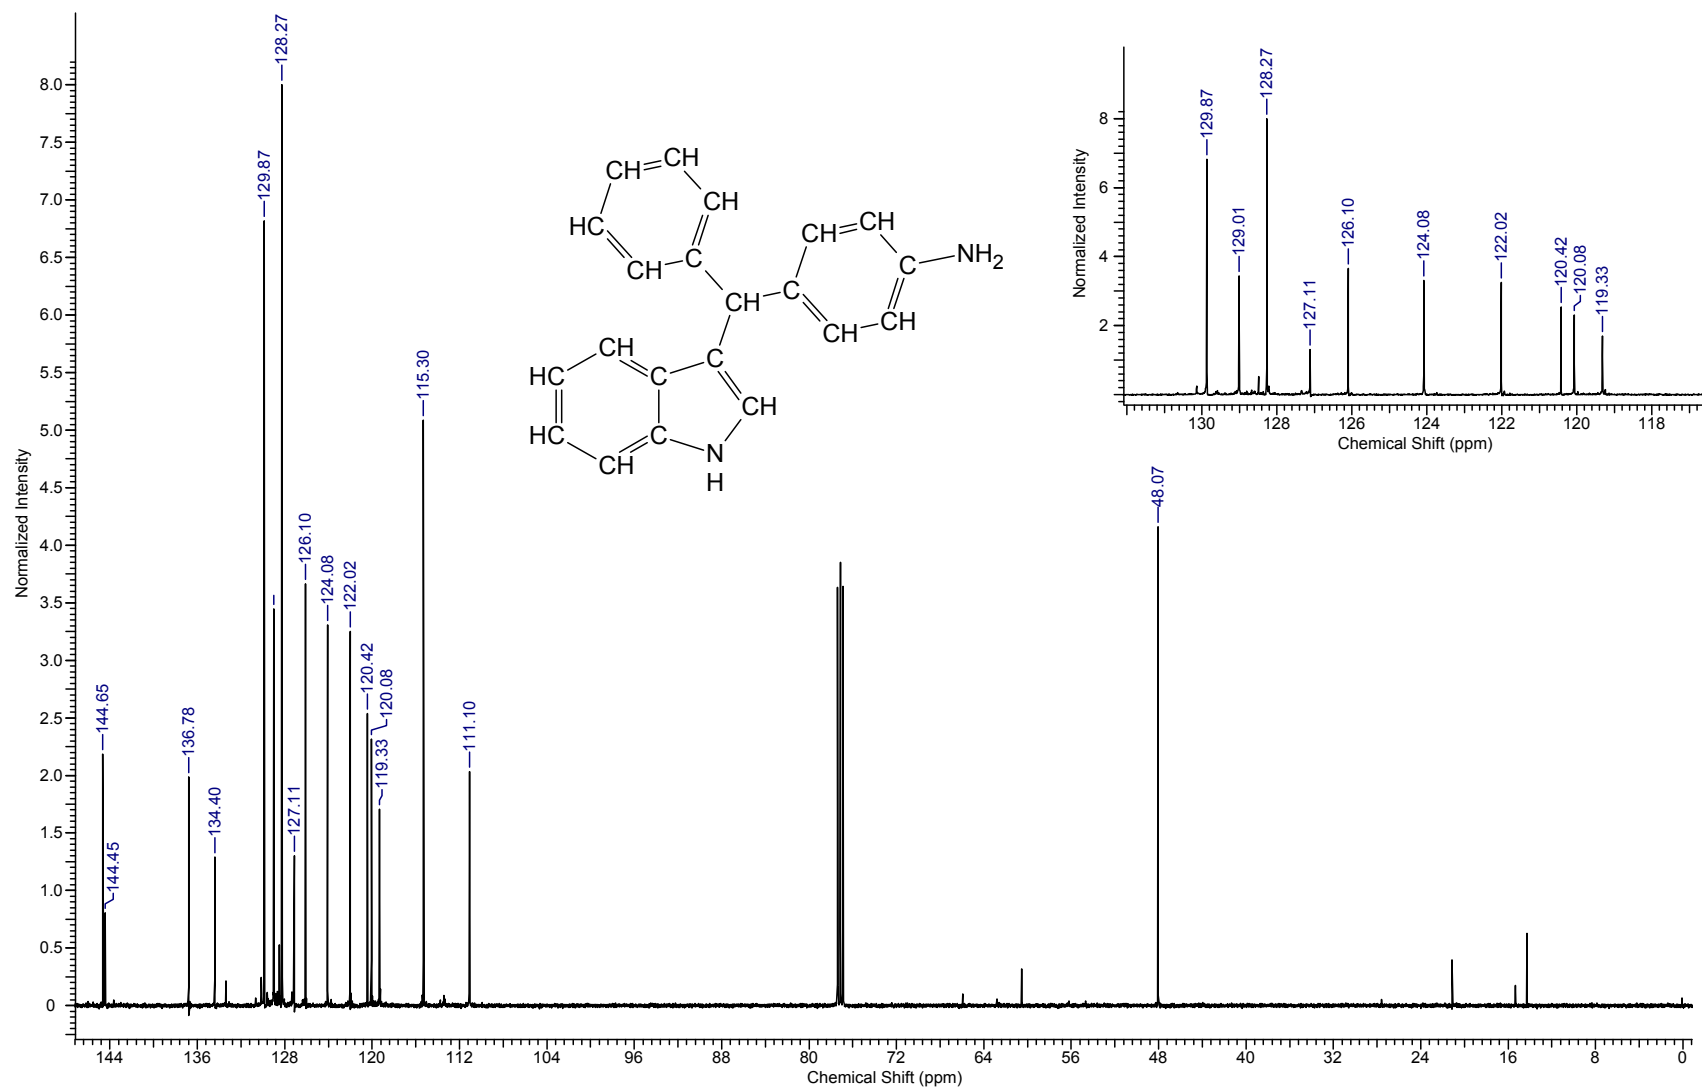

<sup>13</sup>C NMR (126 MHz, CDCl<sub>3</sub>) δ = 144.65, 144.45, 136.78, 134.40, 129.87, 129.01, 128.27, 127.11, 126.10, 124.08, 122.02, 120.42, 120.08, 119.33, 115.30, 111.10, 48.07.

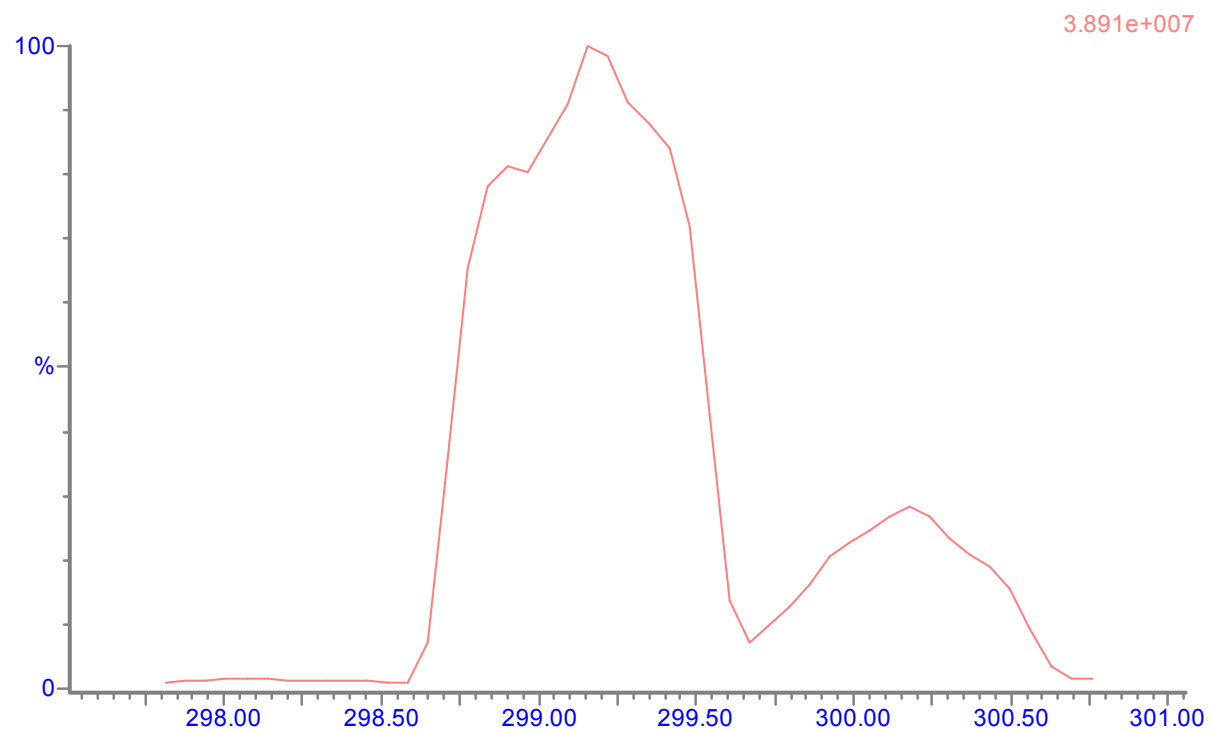

| Formula Mass | Daughter number | Parent m/z | Cone Voltage (V) | Daughters | Collision Energy (eV) | Ion Mode |
|--------------|-----------------|------------|------------------|-----------|-----------------------|----------|
| 298.38       | 1               | 299.14     | 34               | 182.06    | 20                    | ES+      |
|              | 2               | 299.14     | 34               | 206.12    | 18                    | ES+      |
|              | 3               | 299.14     | 34               | 165.08    | 42                    | ES+      |

### 3.2 4-methylbenzaldehyde (1b) + indole (2a) + aniline (3e): (6bb) 4-[1*H*-indol-3-yl(4-methylphenyl)methyl]aniline

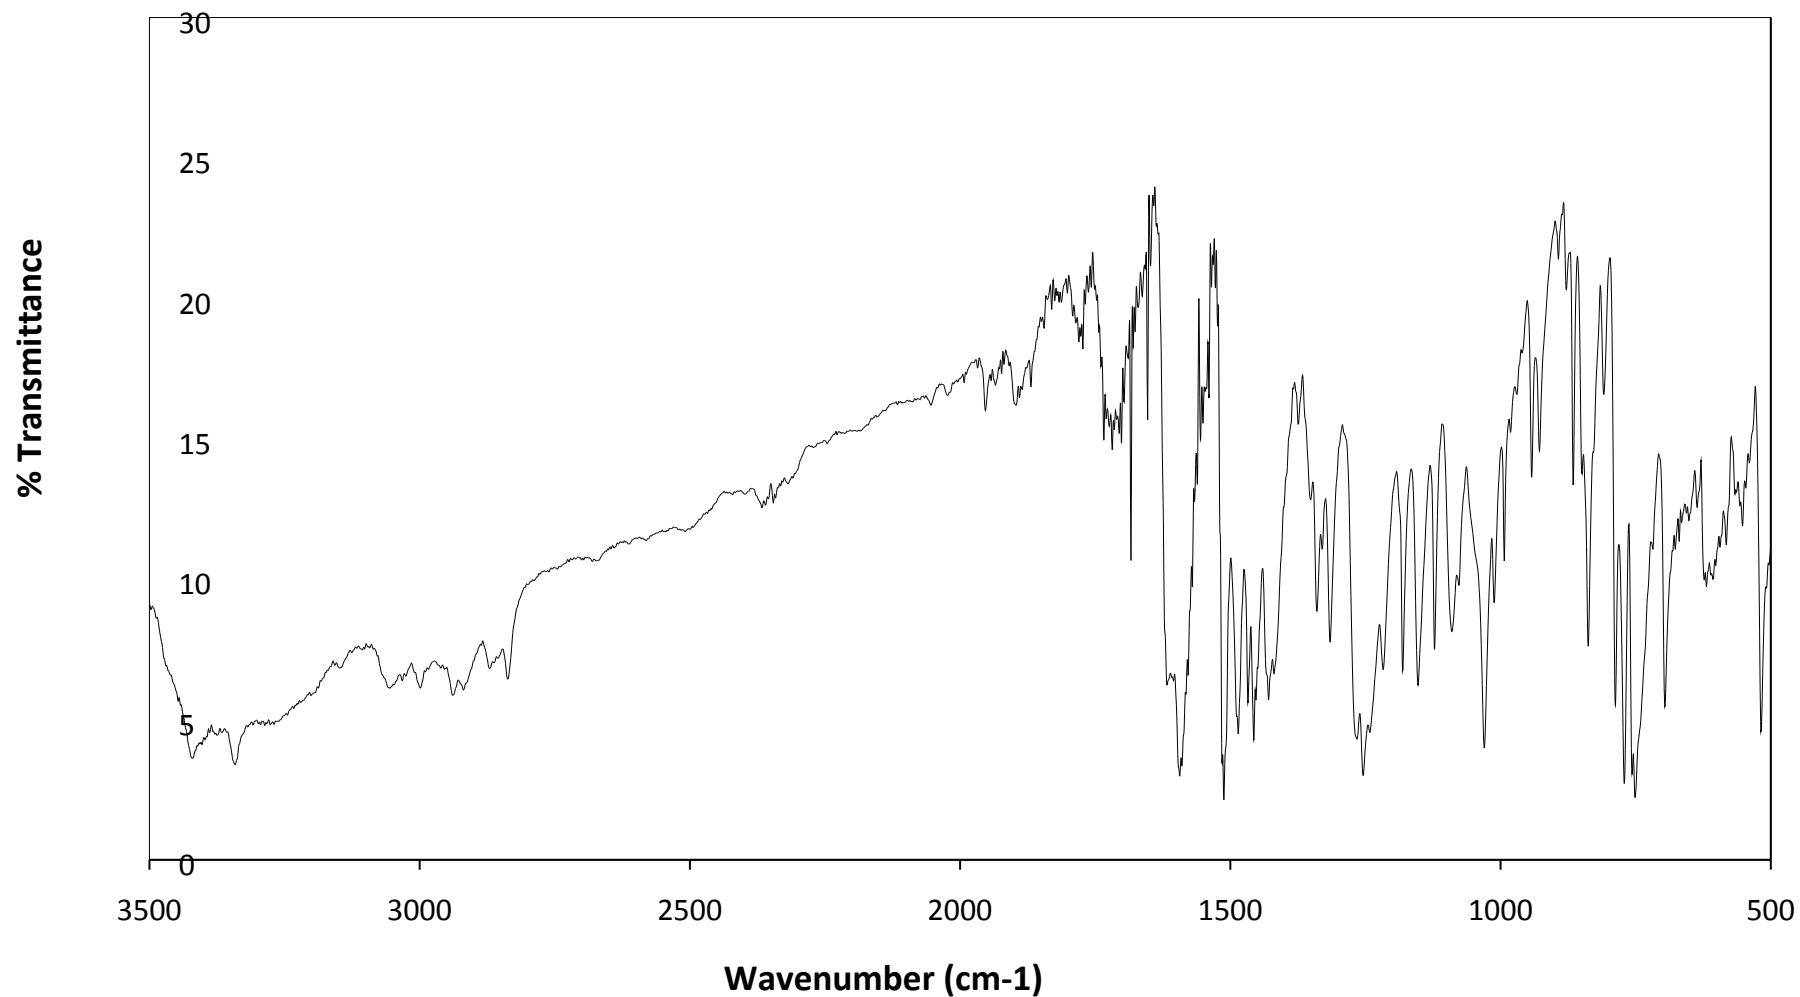

IR (KBr, cm<sup>-1</sup>): 3419 (s), 3342 (s), 3269 (m), 3057 (m), 2997 (m), 2937 (m), 2918 (m), 2870 (m), 2837 (m), 1780 (w), 1734 (w), 1718 (w), 1701 (w), 1616 (m), 1593 (s), 1512 (s), 1485 (s), 1456 (s), 1429 (m), 1340 (m), 1315 (m), 1267 (s), 1253 (s), 1242 (s), 1217 (m), 1180 (m), 1153 (m), 1122 (m), 1089 (m), 1076 (m), 1029 (s), 1012 (m), 993 (m), 943 (w), 927 (w), 893 (w), 877 (w), 866 (w), 837 (m), 786 (m), 771 (s), 750 (s), 696 (m), 619 (m).

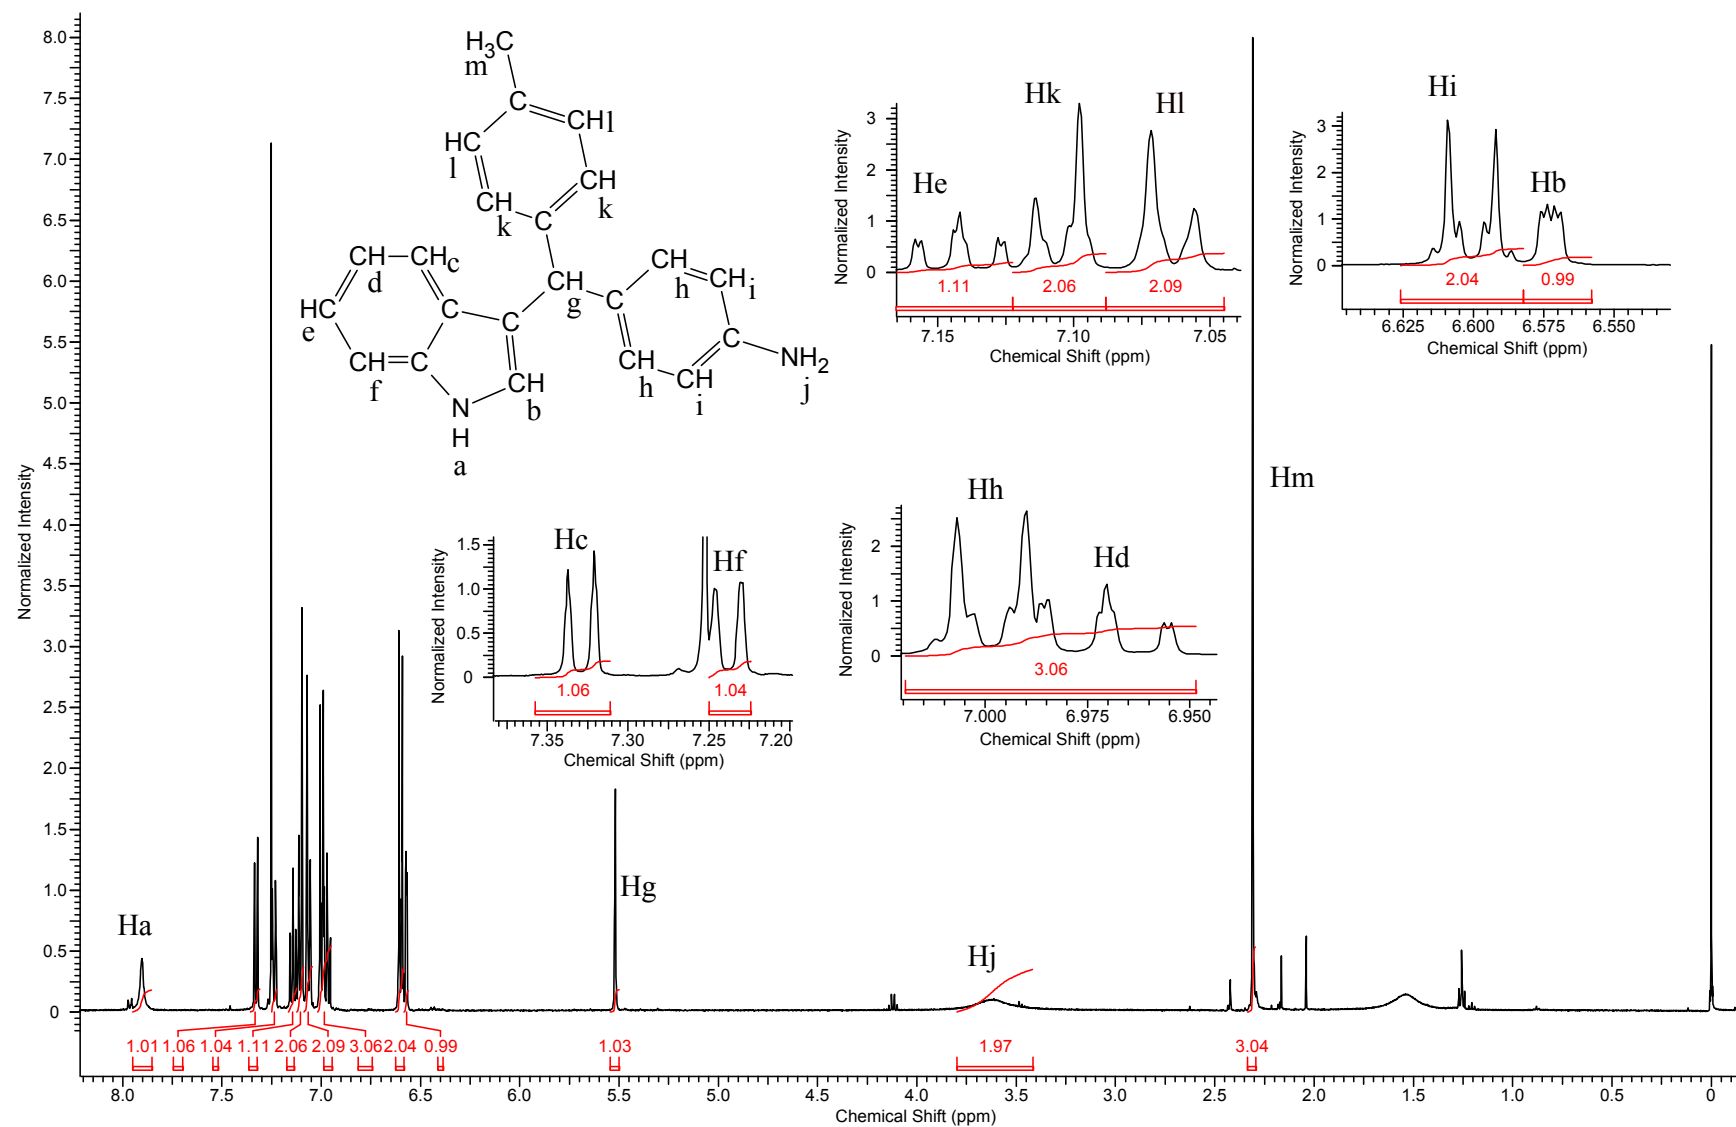

<sup>1</sup>H NMR (500 MHz, CDCl<sub>3</sub>) δ = 7.90 (br s, 1 H), 7.33 (d, *J* = 8.1 Hz, 1 H), 7.24 (d, *J* = 7.9 Hz, 1 H), 7.14 (ddd, *J* = 1.2, 7.0, 7.9 Hz, 1 H), 7.11 (d, *J* = 7.9 Hz, 2 H), 7.07 (d, *J* = 7.9 Hz, 2 H), 7.00 (d, *J* = 8.5 Hz, 2H), 6.97 (ddd, *J* = 1.2, 7.0, 8.1 Hz, 1 H), 6.60 (d, *J* = 8.5 Hz, 2 H), 6.57 (dd, *J* = 1.2, 2.4 Hz, 1 H), 3.61 (br s, 1H), 5.52 (s, 1 H), 2.31 (s, 3 H).

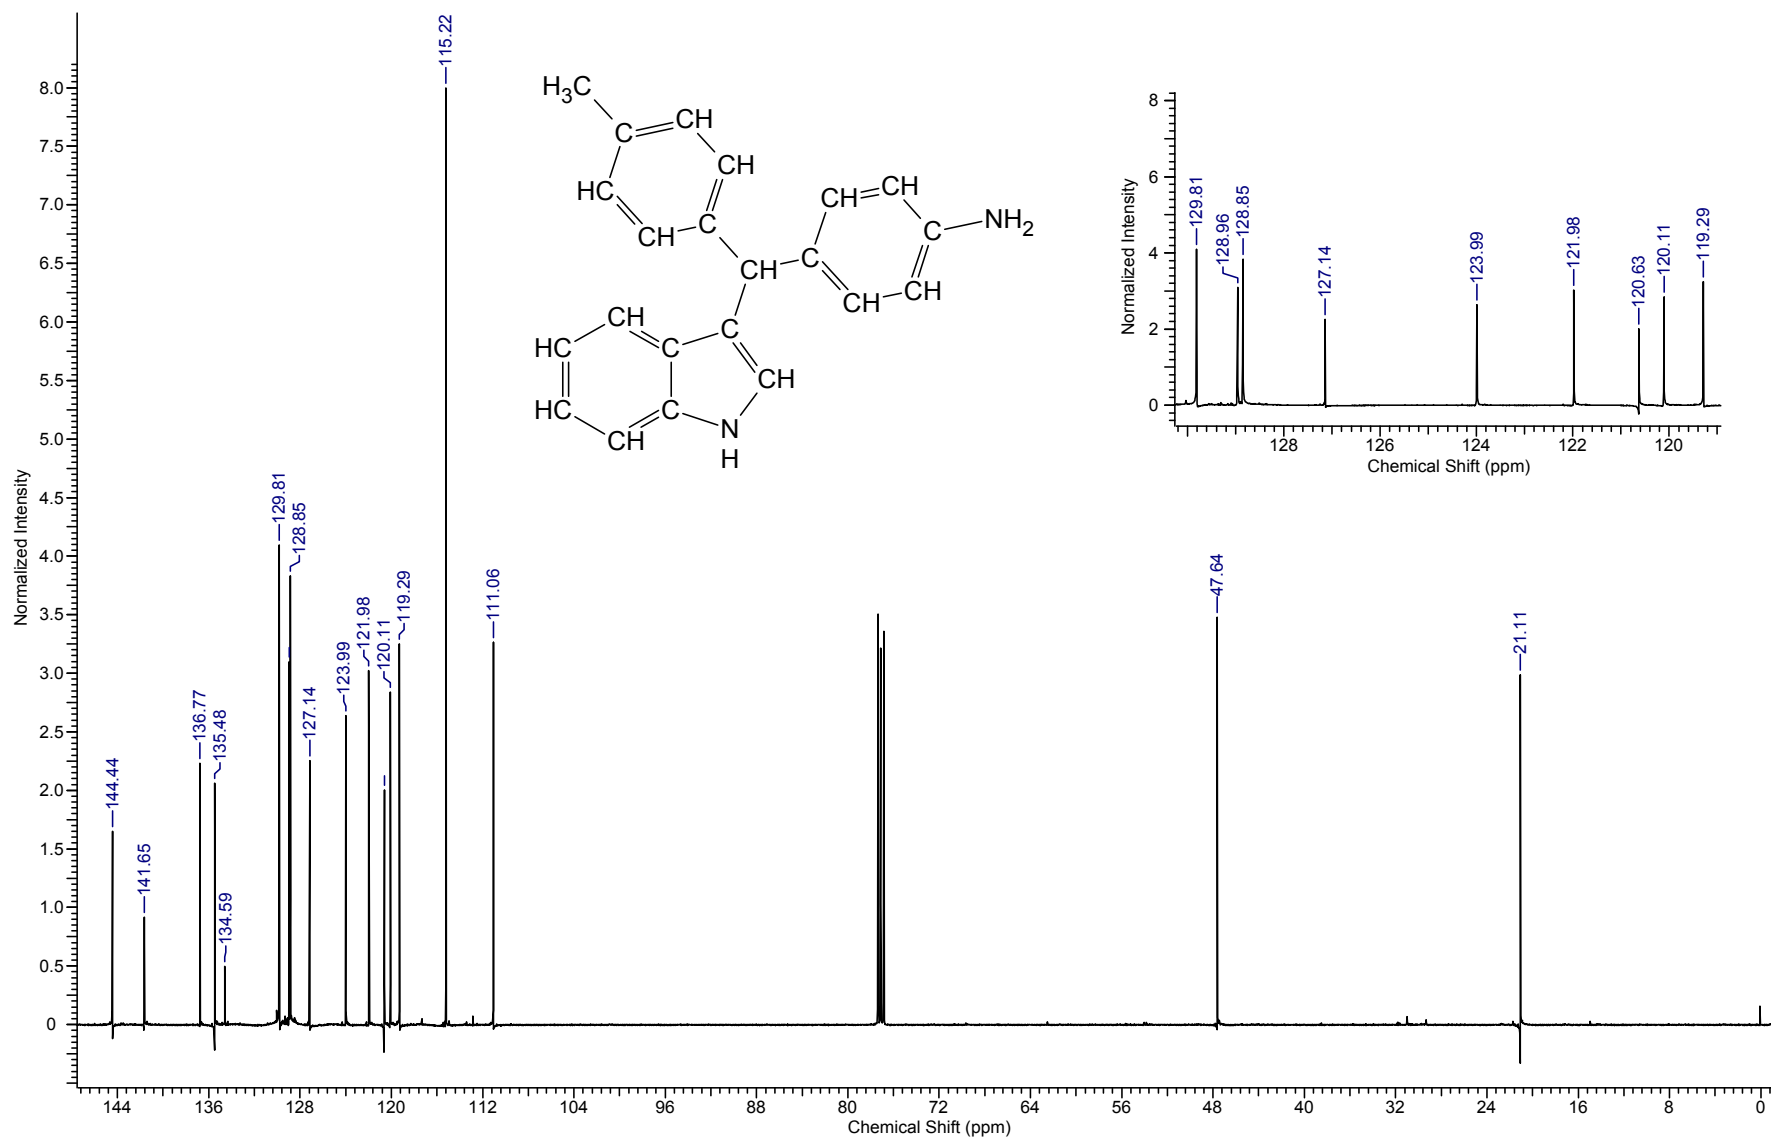

<sup>13</sup>C NMR (126 MHz, CDCl<sub>3</sub>) δ = 144.44, 141.65, 136.77, 135.48, 134.59, 129.81, 128.96, 128.85, 127.14, 123.99, 121.98, 120.63, 120.11, 119.29, 115.22, 111.06, 47.64, 21.11.

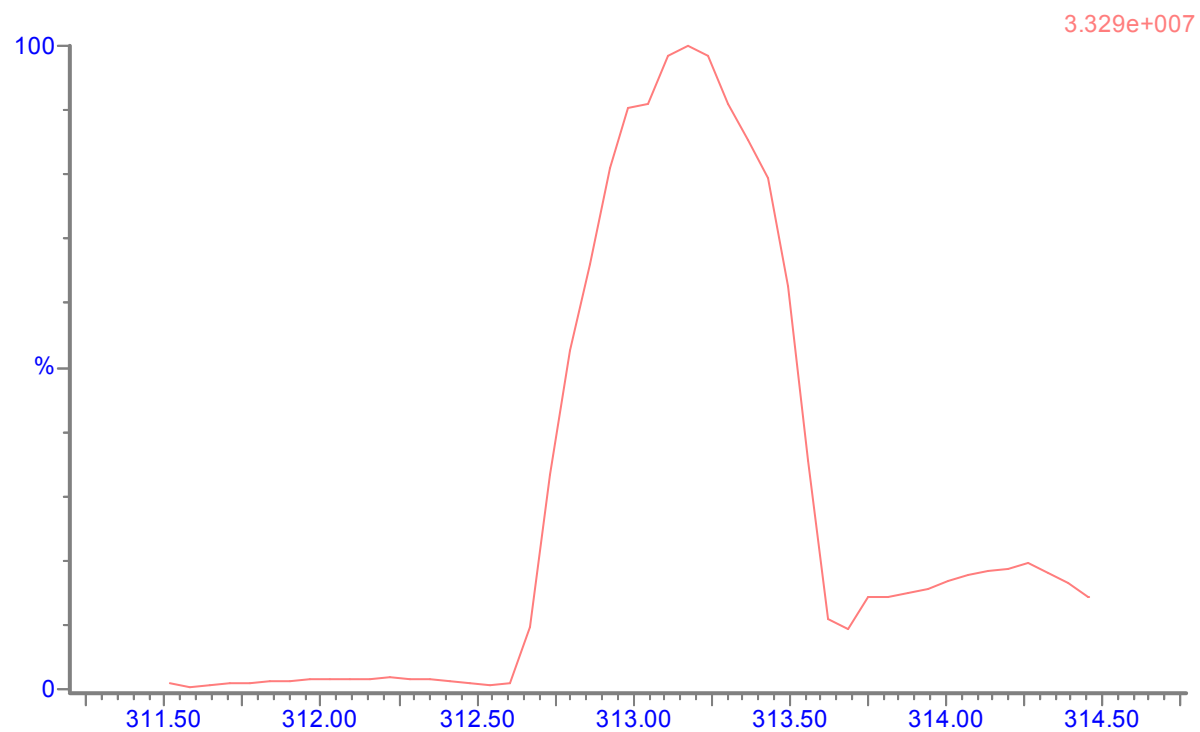

| Formula Mass | Daughter number | Parent m/z | Cone Voltage (V) | Daughters | Collision Energy (eV) | Ion Mode |
|--------------|-----------------|------------|------------------|-----------|-----------------------|----------|
| 312.41       | 1               | 313.16     | 26               | 196.09    | 18                    | ES+      |
|              | 2               | 313.16     | 26               | 220.28    | 18                    | ES+      |
|              | 3               | 313.16     | 26               | 180.94    | 34                    | ES+      |
|              | 4               | 313.16     | 26               | 180.74    | 52                    | ES+      |
|              | 5               | 313.16     | 26               | 204.28    | 44                    | ES+      |

### 3.3 3-methylbenzaldehyde (1c) + indole (2a) + aniline (3e): (6cc) 4-[1*H*-indol-3-yl(3-methylphenyl)methyl]aniline

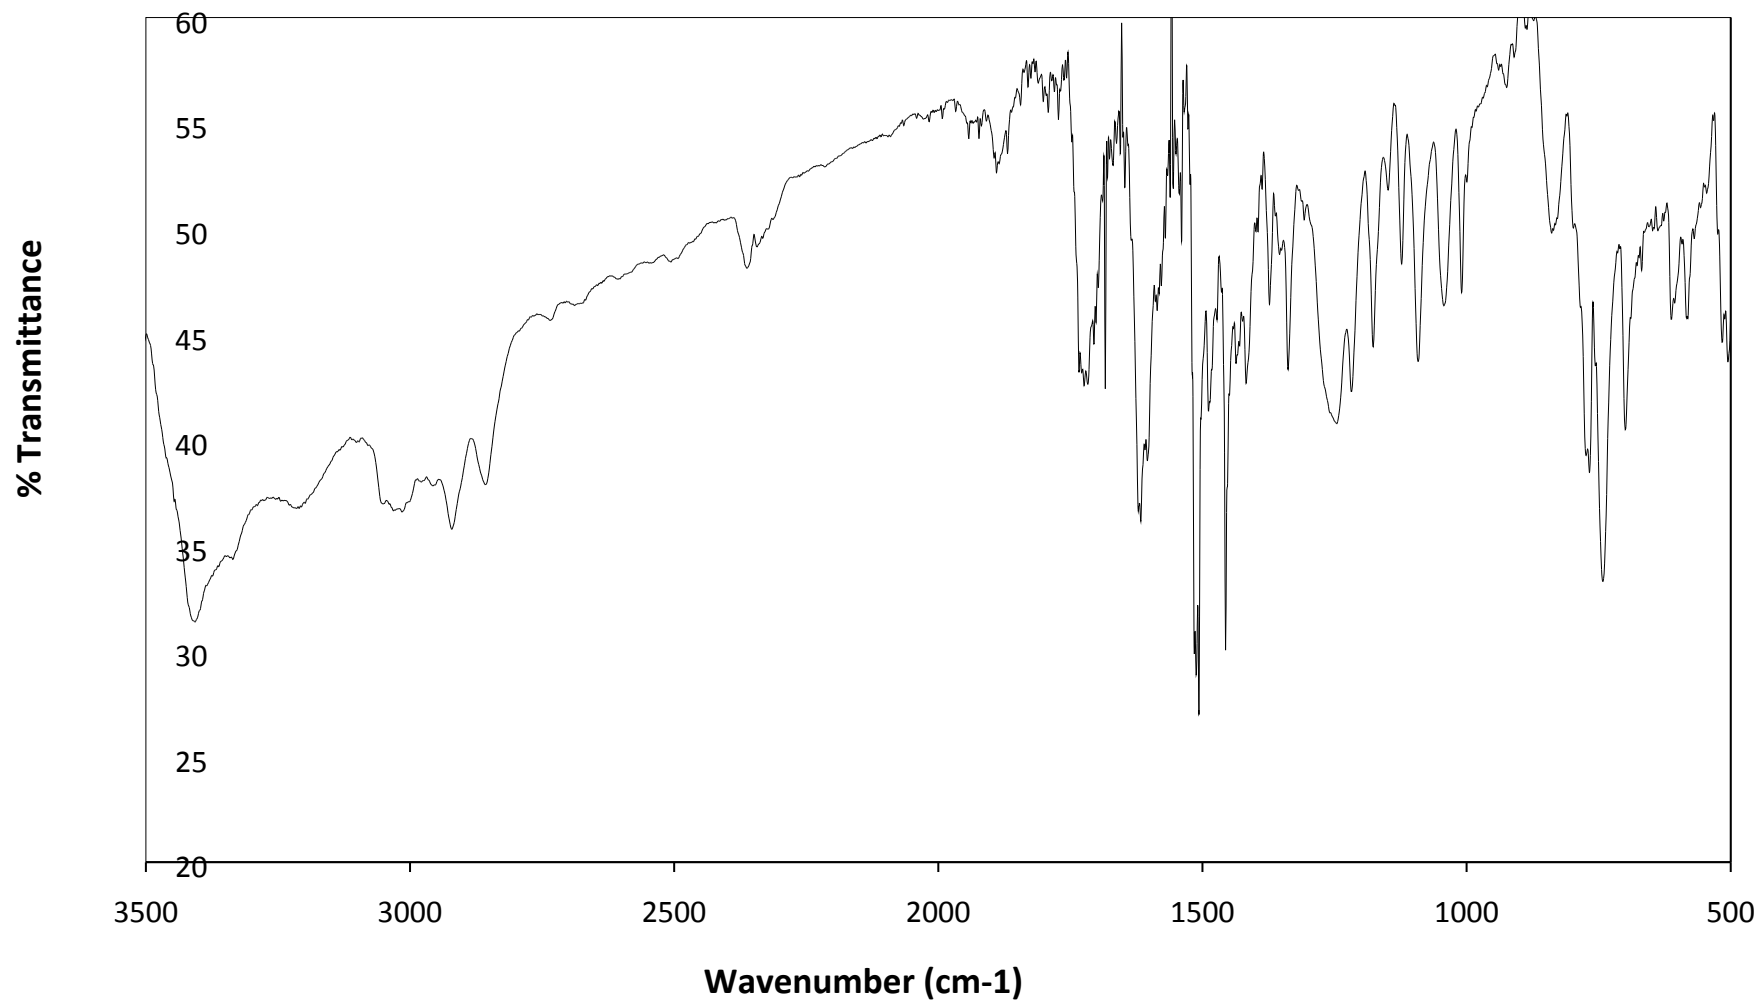

IR (KBr,  $\text{cm}^{-1}$ ): 3408 (s), 3334 (s), 3213 (m), 3053 (m), 3032 (m), 3014 (m), 2920 (m), 2858 (m), 1724 (m), 1683 (m), 1616 (m), 1506 (s), 1489 (m), 1456 (s), 1436 (m), 1417 (m), 1373 (m), 1338 (m), 1246 (m), 1217 (m), 1176 (m), 1147 (w), 1122 (m), 1091 (m), 1041 (m), 1008 (m), 839 (w), 767 (m), 742 (s), 700 (s), 611 (m).

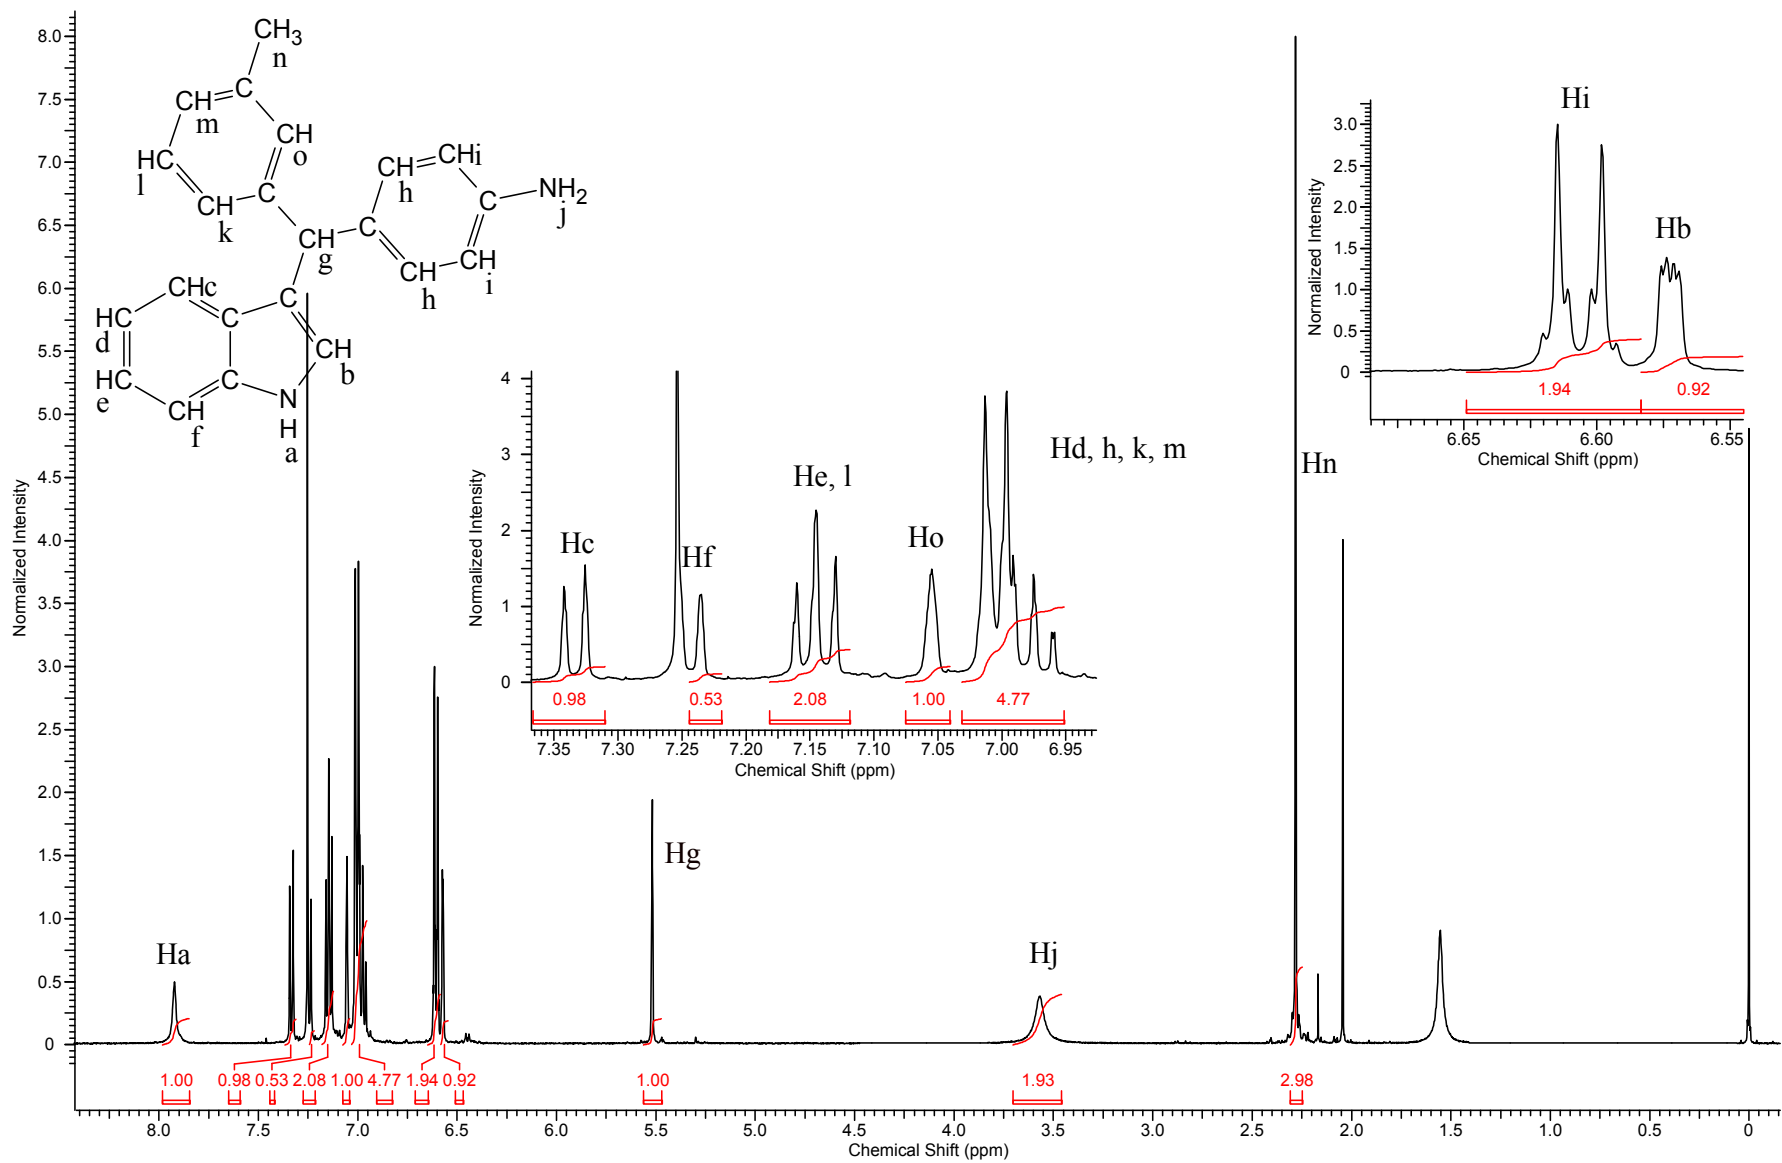

<sup>1</sup>H NMR (500MHz, CDCl<sub>3</sub>) δ = 7.92 (br s, 1 H), 7.33 (d, *J* = 8.2 Hz, 1 H), 7.24 (d, *J* = 7.9 Hz, 1 H), 7.18 - 7.12 (m, 2 H), 7.05 (s, 1 H), 7.03 - 6.95 (m, 5 H), 6.61 (d, *J* = 8.5 Hz, 2 H), 6.57 (dd, *J* = 0.9, 2.4 Hz, 1 H), 5.52 (s, 1 H), 3.57 (br s, 2 H), 2.28 (s, 3 H).



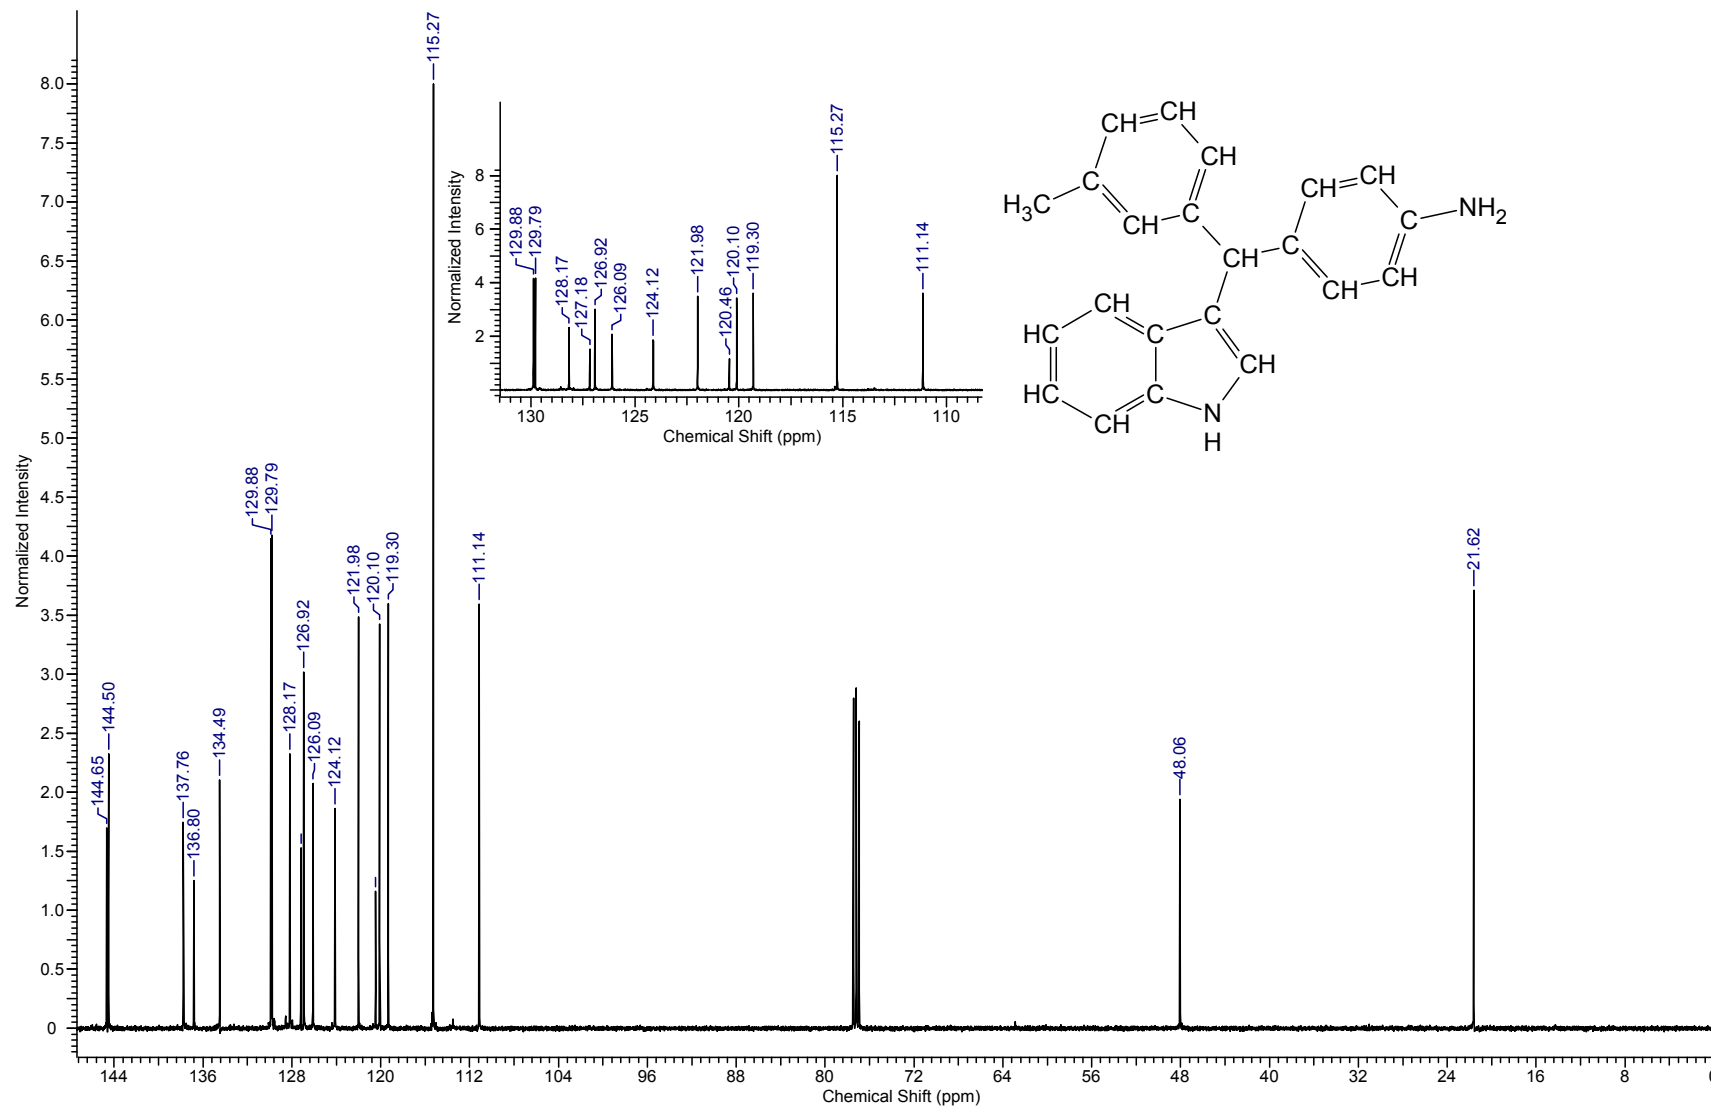

$^{13}\text{C}$  NMR (126 MHz,  $\text{CDCl}_3$ )  $\delta$  = 144.65, 144.50, 137.76, 136.80, 134.49, 129.88, 129.79, 128.17, 127.18, 126.92, 126.09, 124.12, 121.98, 120.46, 120.10, 119.30, 115.27, 111.14, 48.06, 21.62.

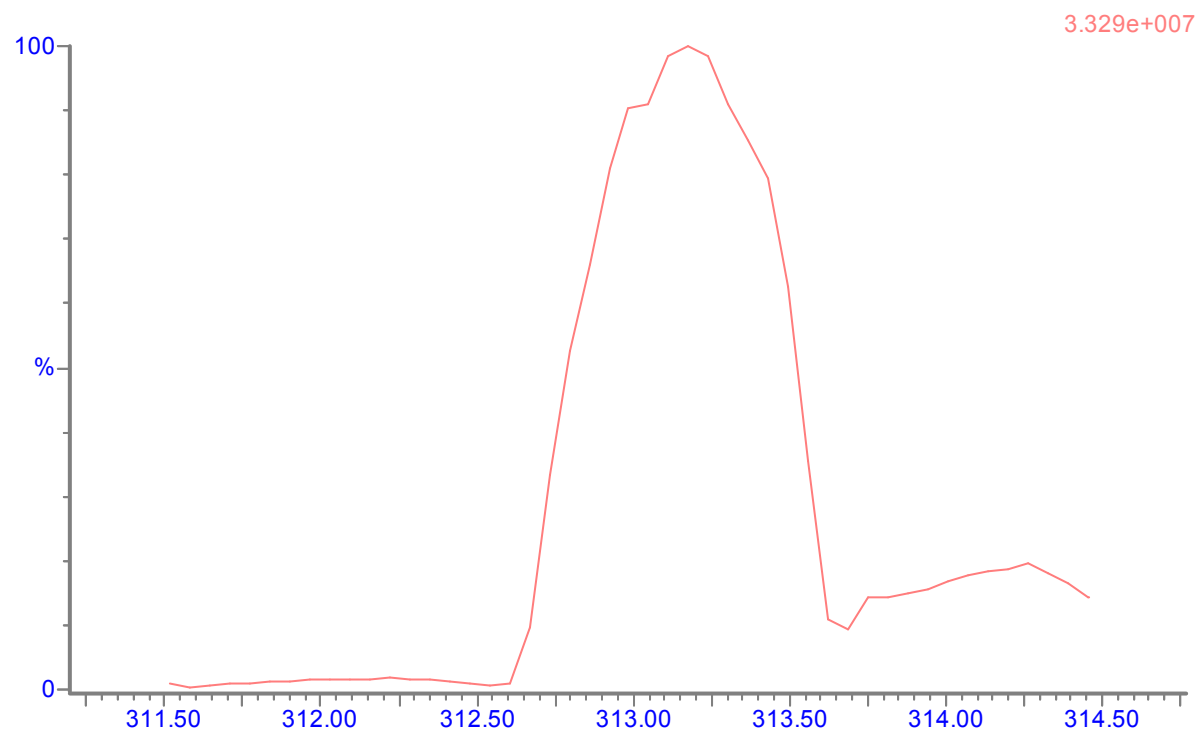

| Formula Mass | Daughter number | Parent m/z | Cone Voltage (V) | Daughters | Collision Energy (eV) | Ion Mode |
|--------------|-----------------|------------|------------------|-----------|-----------------------|----------|
| 312.41       | 1               | 313.16     | 26               | 196.09    | 18                    | ES+      |
|              | 2               | 313.16     | 26               | 220.28    | 18                    | ES+      |
|              | 3               | 313.16     | 26               | 180.94    | 34                    | ES+      |
|              | 4               | 313.16     | 26               | 180.74    | 52                    | ES+      |
|              | 5               | 313.16     | 26               | 204.28    | 44                    | ES+      |

### 3.4 4-nitrobenzaldehyde (1f) + indole (2a) + aniline (3e): (6dd) 4-[1H-indol-3-yl(4-nitrophenyl)methyl]aniline

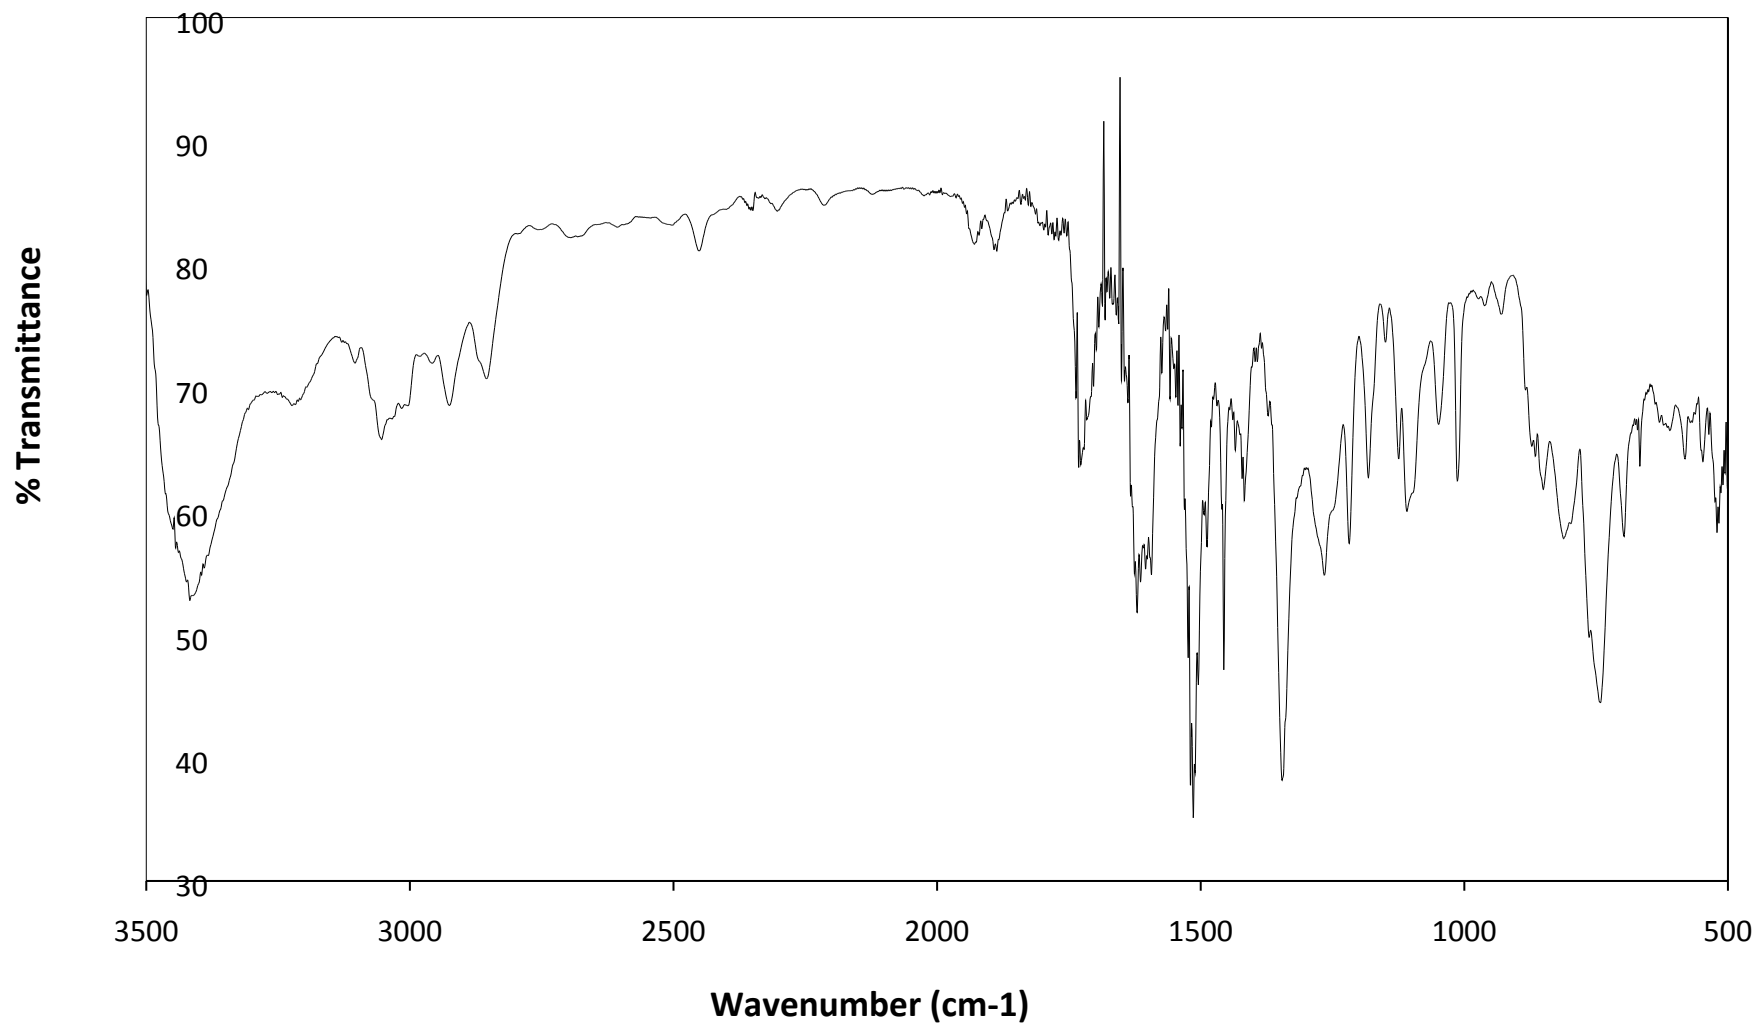

IR (KBr,  $\text{cm}^{-1}$ ): 3417 (br, m), 3217 (m), 3107 (m), 3053 (m), 3034 (m), 3012 (m), 2956 (m), 2924 (m), 2854 (m), 1930 (w), 1892 (w), 1726 (m), 1620 (m), 1514 (s), 1487 (m), 1456 (m), 1417 (m), 1346 (s), 1265 (m), 1219 (m), 1180 (m), 1149 (w), 1124 (m), 1109 (m), 1049 (m), 1012 (m), 960 (w), 931 (w), 850 (m), 742 (s), 696 (m), 667 (m), 613 (m).

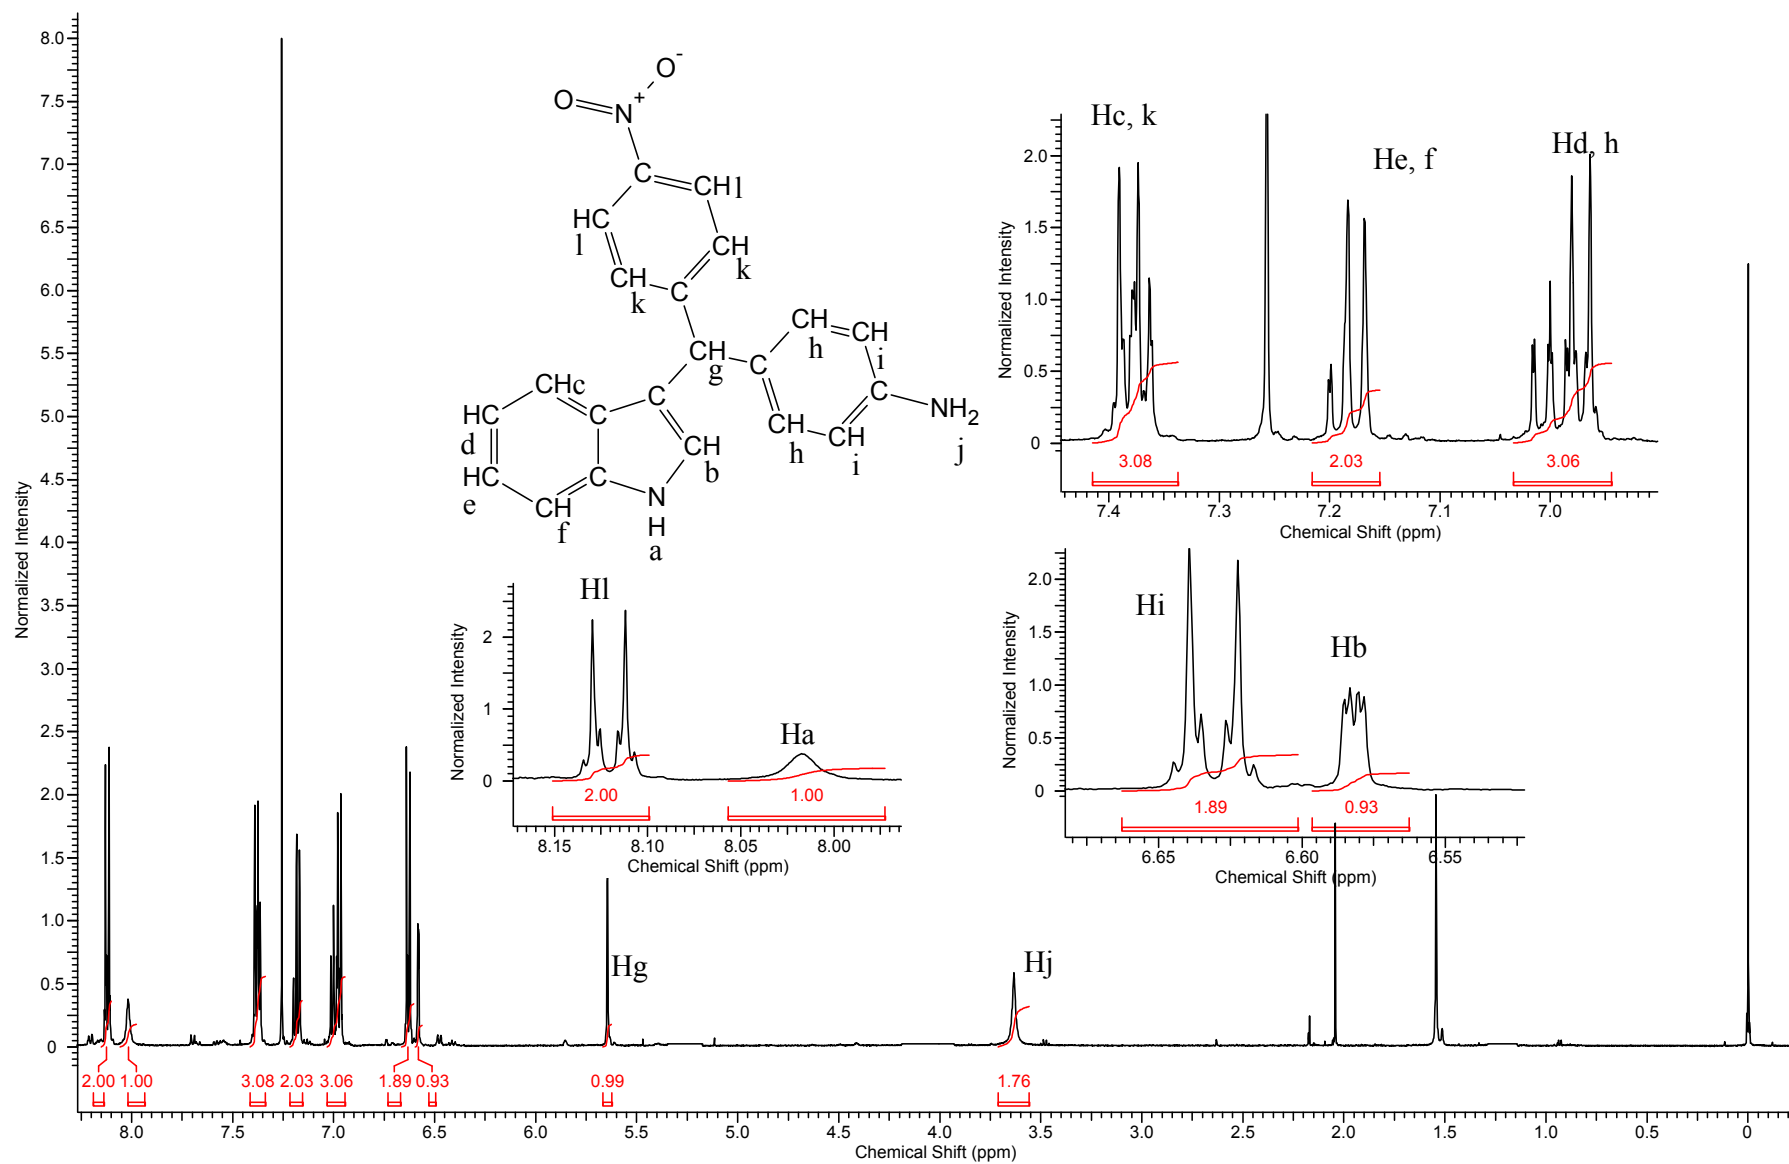

<sup>1</sup>H NMR (500MHz, CDCl<sub>3</sub>) δ = 8.12 (d, *J* = 8.9 Hz, 2 H), 8.02 (br s, 1 H), 7.41 - 7.34 (m, 3 H), 7.22 - 7.15 (m, 2 H), 7.03 - 6.94 (m, 3 H), 6.63 (d, *J* = 8.5 Hz, 2 H), 6.58 (dd, *J* = 0.9, 2.4 Hz, 1 H), 5.65 (s, 1 H), 3.63 (br s, 2 H).

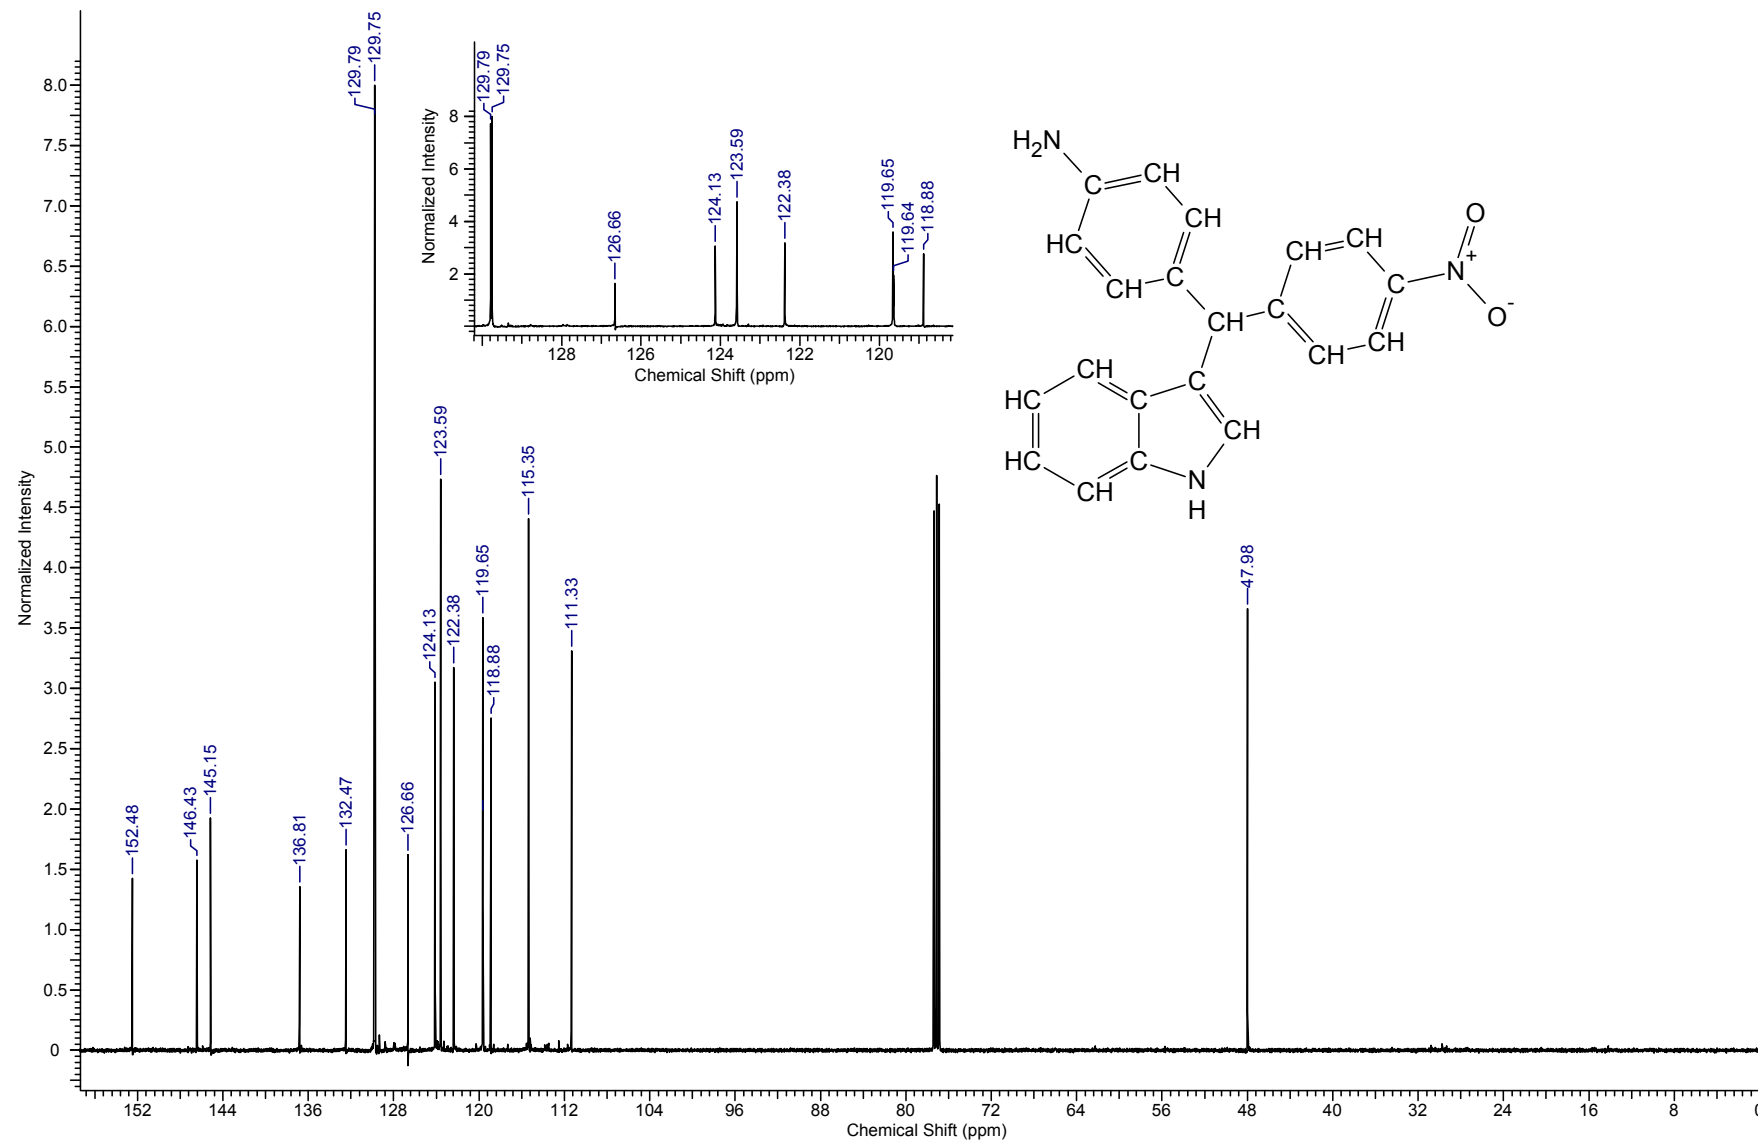

$^{13}\text{C}$  NMR (126 MHz,  $\text{CDCl}_3$ )  $\delta$  = 152.48, 146.43, 145.15, 136.81, 132.47, 129.79, 129.75, 126.66, 124.13, 123.59, 122.38, 119.65, 119.64, 118.88, 115.35, 111.33, 47.98.

### 3.5 3-methoxybenzaldehyde (1h) + indole (2a) + aniline (3e): (6ee) 4-[1H-indol-3-yl(3-methoxyphenyl)methyl]aniline

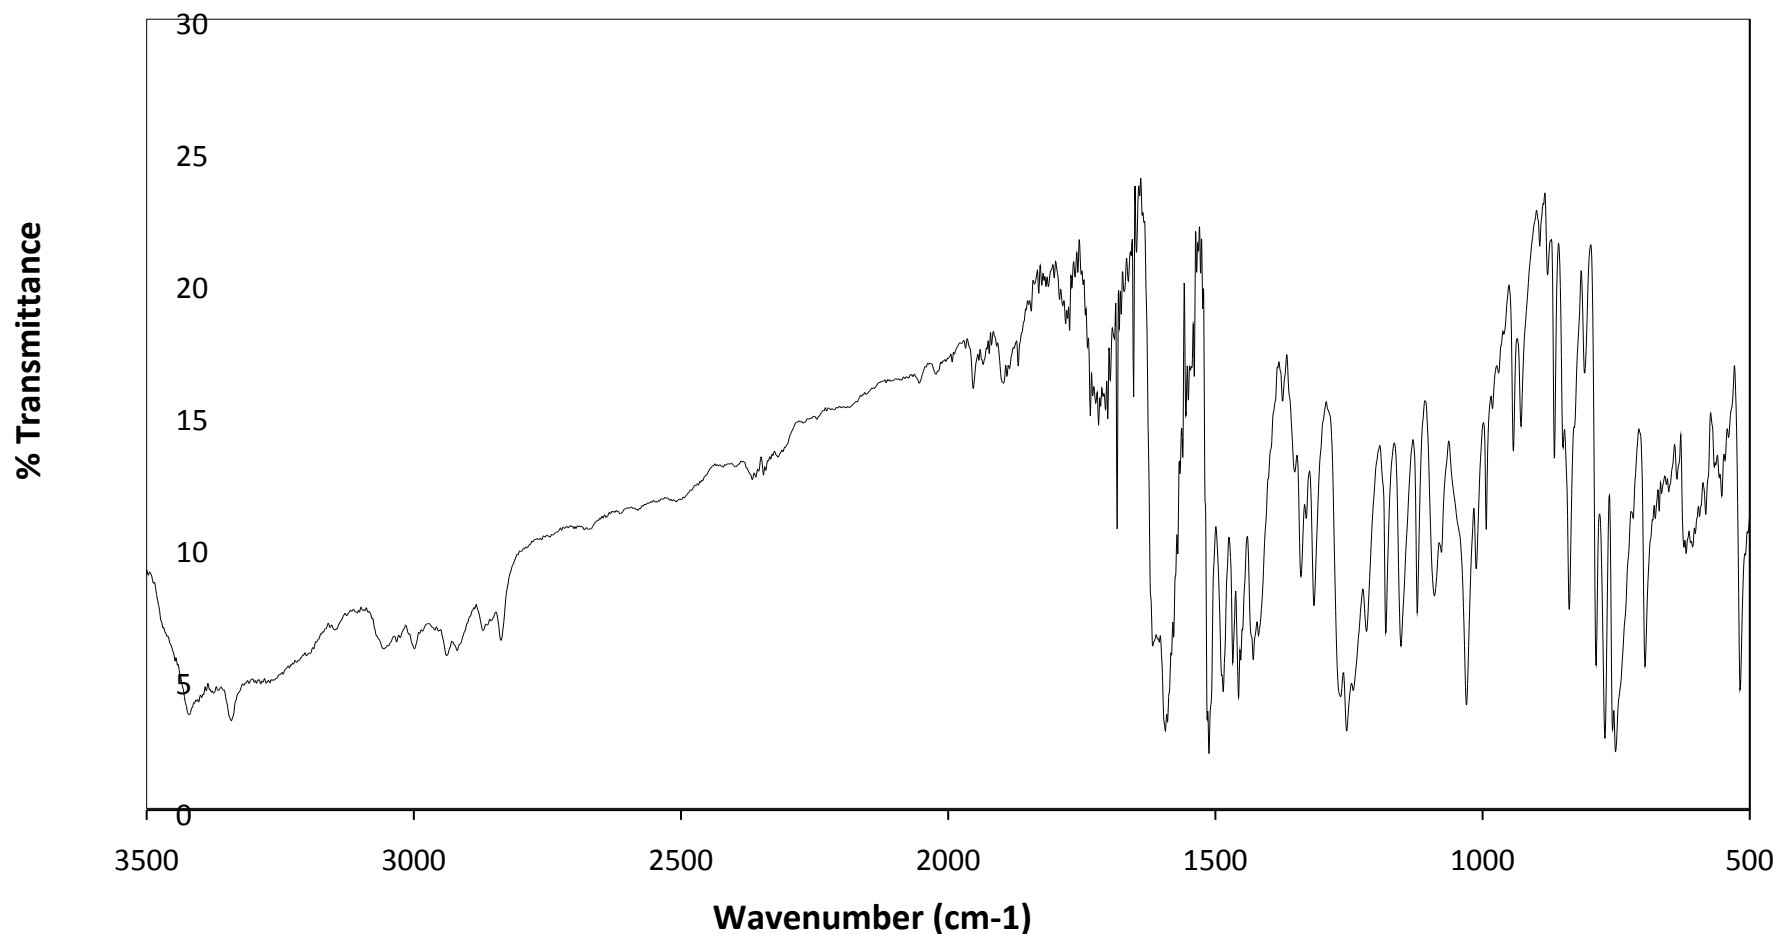

IR (KBr, cm<sup>-1</sup>): 3419 (s), 3404 (s), 3340 (s), 3275 (br, s), 3143 (s), 3057 (s), 2997 (s), 2937 (s), 2918 (s), 2870 (s), 2835 (s), 1734 (w), 1718 (w), 1701 (w), 1683 (m), 1652 (w), 1618 (s), 1593 (s), 1539 (w), 1512 (s), 1485 (s), 1467 (s), 1456 (s), 1452 (s), 1429 (s), 1419 (s), 1388 (w), 1340 (m), 1315 (m), 1265 (s), 1252 (s), 1242 (s), 1217 (m), 1180 (m), 1153 (m), 1122 (m), 1089 (m), 1076 (m), 1029 (s), 1012 (m), 993 (m), 943 (w), 927 (w), 893 (w), 877 (w), 866 (w), 837 (m), 808 (w), 786 (s), 771 (s), 750 (s), 696 (m), 619 (m), 607 (m).

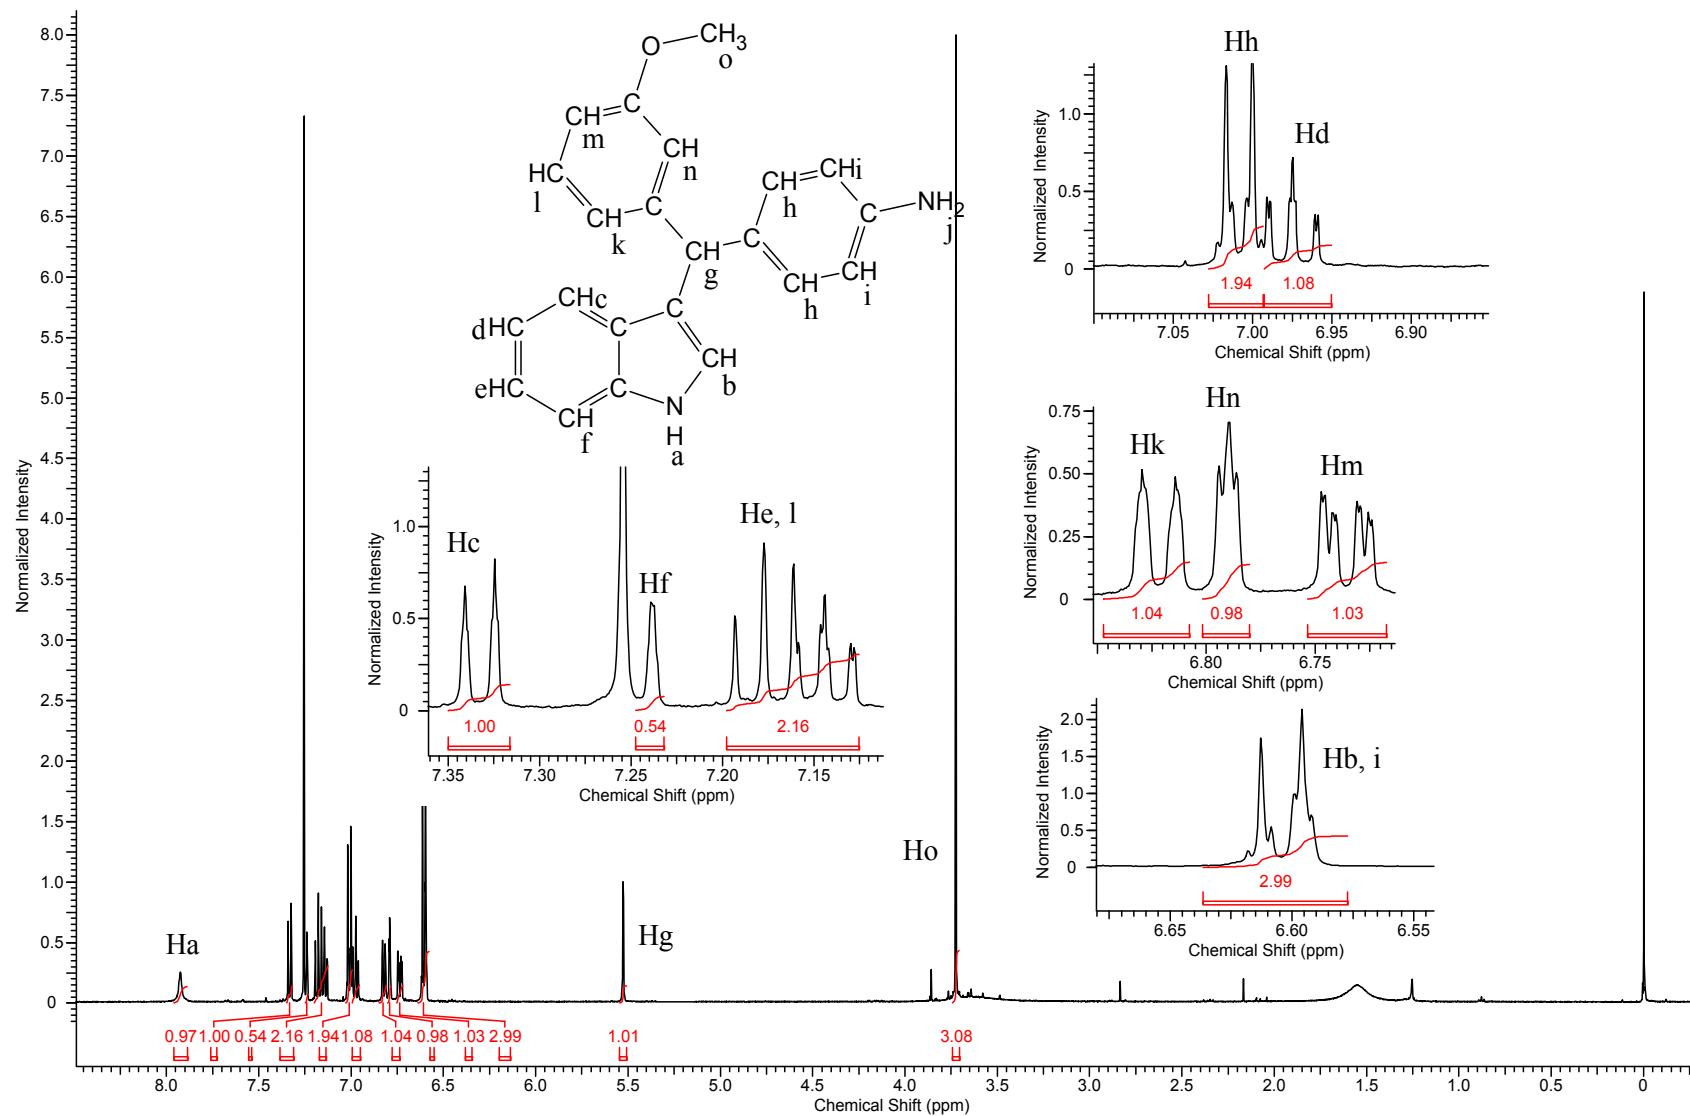

<sup>1</sup>H NMR (500MHz, CDCl<sub>3</sub>) δ = 7.92 (br s, 1 H), 7.33 (d, *J* = 8.2 Hz, 1 H), 7.25 (d, *J* = 7.9 Hz, 2 H), 7.20 - 7.13 (m, 2 H), 7.01 (d, *J* = 8.5 Hz, 2 H), 6.98 (ddd, *J* = 0.9, 7.2, 8.2 Hz, 1 H), 6.82 (d, *J* = 7.6 Hz, 1 H), 6.79 (t, *J* = 2.1 Hz, 1 H), 6.74 (ddd, *J* = 0.9, 2.5, 8.2 Hz, 1 H), 6.64 - 6.58 (m, 3 H), 5.53 (s, 1 H), 3.72 (s, 3 H).

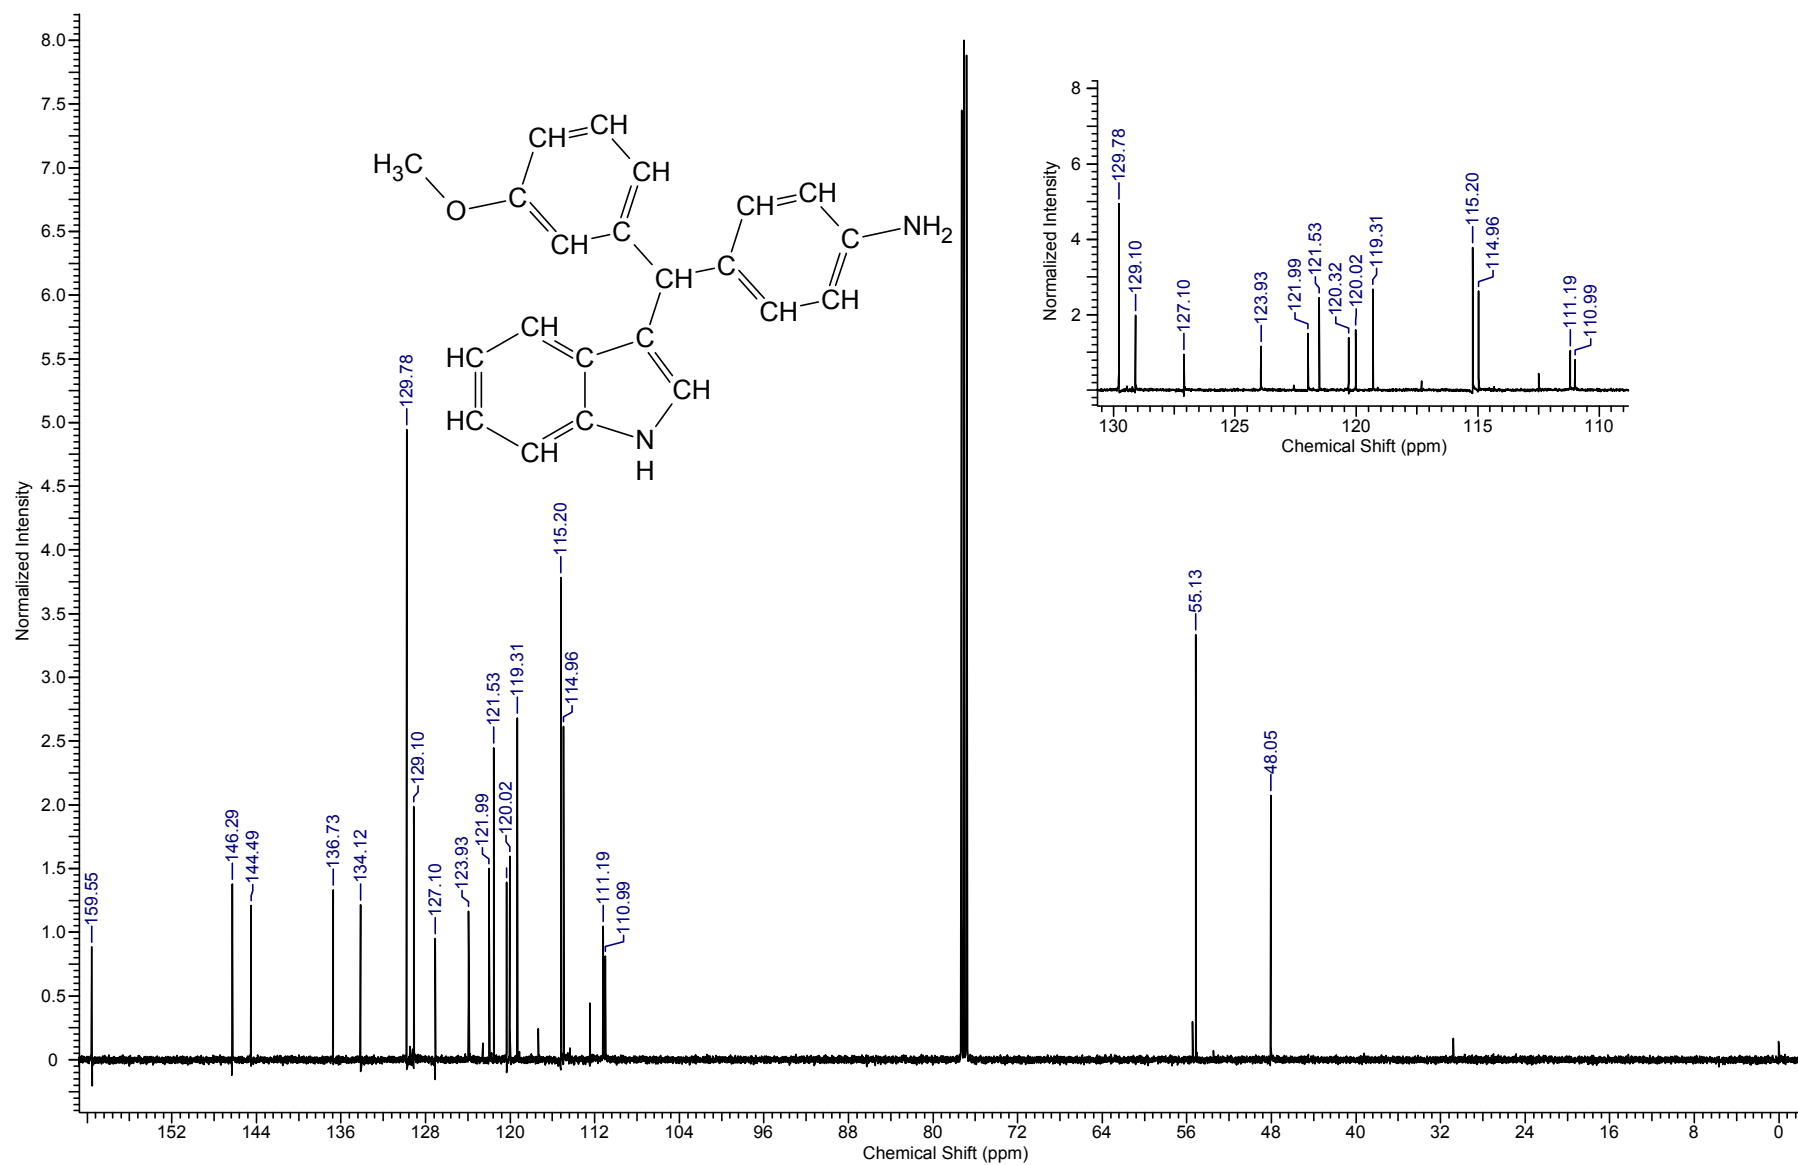

<sup>13</sup>C NMR (126 MHz, CDCl<sub>3</sub>) δ = 159.55, 146.29, 144.49, 136.73, 134.12, 129.78, 129.10, 127.10, 123.93, 121.99, 121.53, 120.32, 120.02, 119.31, 115.20, 114.96, 111.19, 110.99, 55.13, 48.05.



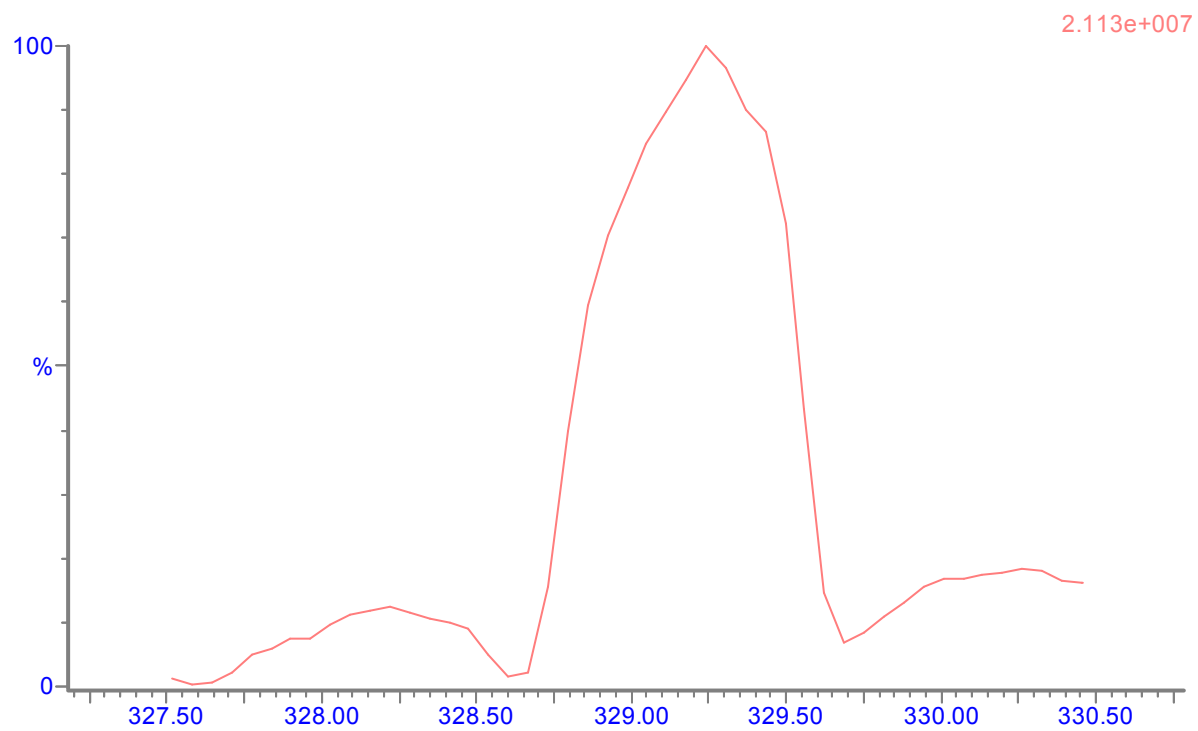

| Formula Mass | Daughter number | Parent m/z | Cone Voltage (V) | Daughters | Collision Energy (eV) | Ion Mode |
|--------------|-----------------|------------|------------------|-----------|-----------------------|----------|
| 328.41       | 1               | 329.16     | 34               | 212.16    | 22                    | ES+      |
|              | 2               | 329.16     | 34               | 236.16    | 22                    | ES+      |
|              | 3               | 329.16     | 34               | 180.95    | 30                    | ES+      |
|              | 4               | 329.16     | 34               | 221.13    | 18                    | ES+      |
|              | 5               | 313.16     | 34               | 296.95    | 30                    | ES+      |

### 3.6 4-methoxybenzaldehyde (1i) + indole (2a) + aniline (3e): (6ff) 4-[1*H*-indol-3-yl(4-methoxyphenyl)methyl]aniline

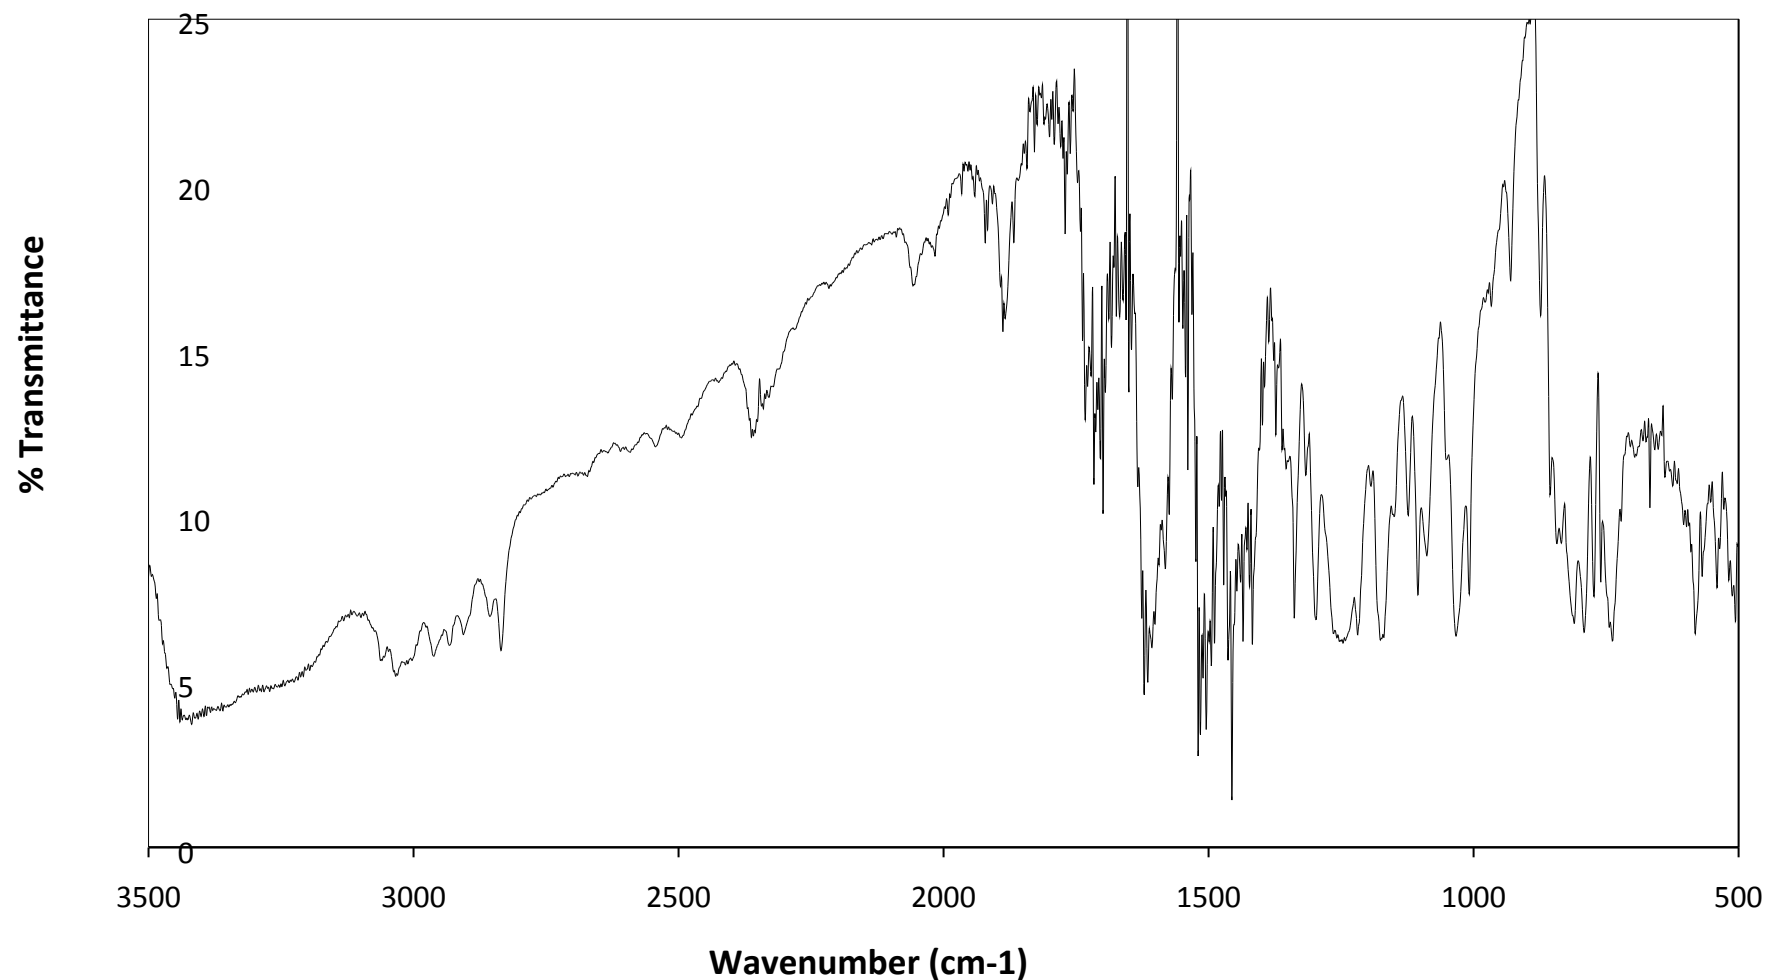

IR (KBr, cm<sup>-1</sup>): 3441 (br, s), 3059 (m), 3034 (m), 2960 (m), 2931 (s), 2904 (m), 2858 (m), 2835 (m), 1888 (w), 1770 (w), 1732 (m), 1716 (m), 1699 (m), 1622 (s), 1614 (m), 1539 (m), 1519 (s), 1504 (s), 1456 (s), 1435 (m), 1417 (m), 1373 (m), 1338 (m), 1338 (m), 1298 (m), 1246 (m), 1219 (m), 1172 (m), 1123 (m), 1105 (m), 1087 (m), 1033 (m), 1008 (m), 929 (w), 873 (w), 842 (m), 810 (m), 790 (m), 773 (m), 759 (m), 738 (m), 667 (m).

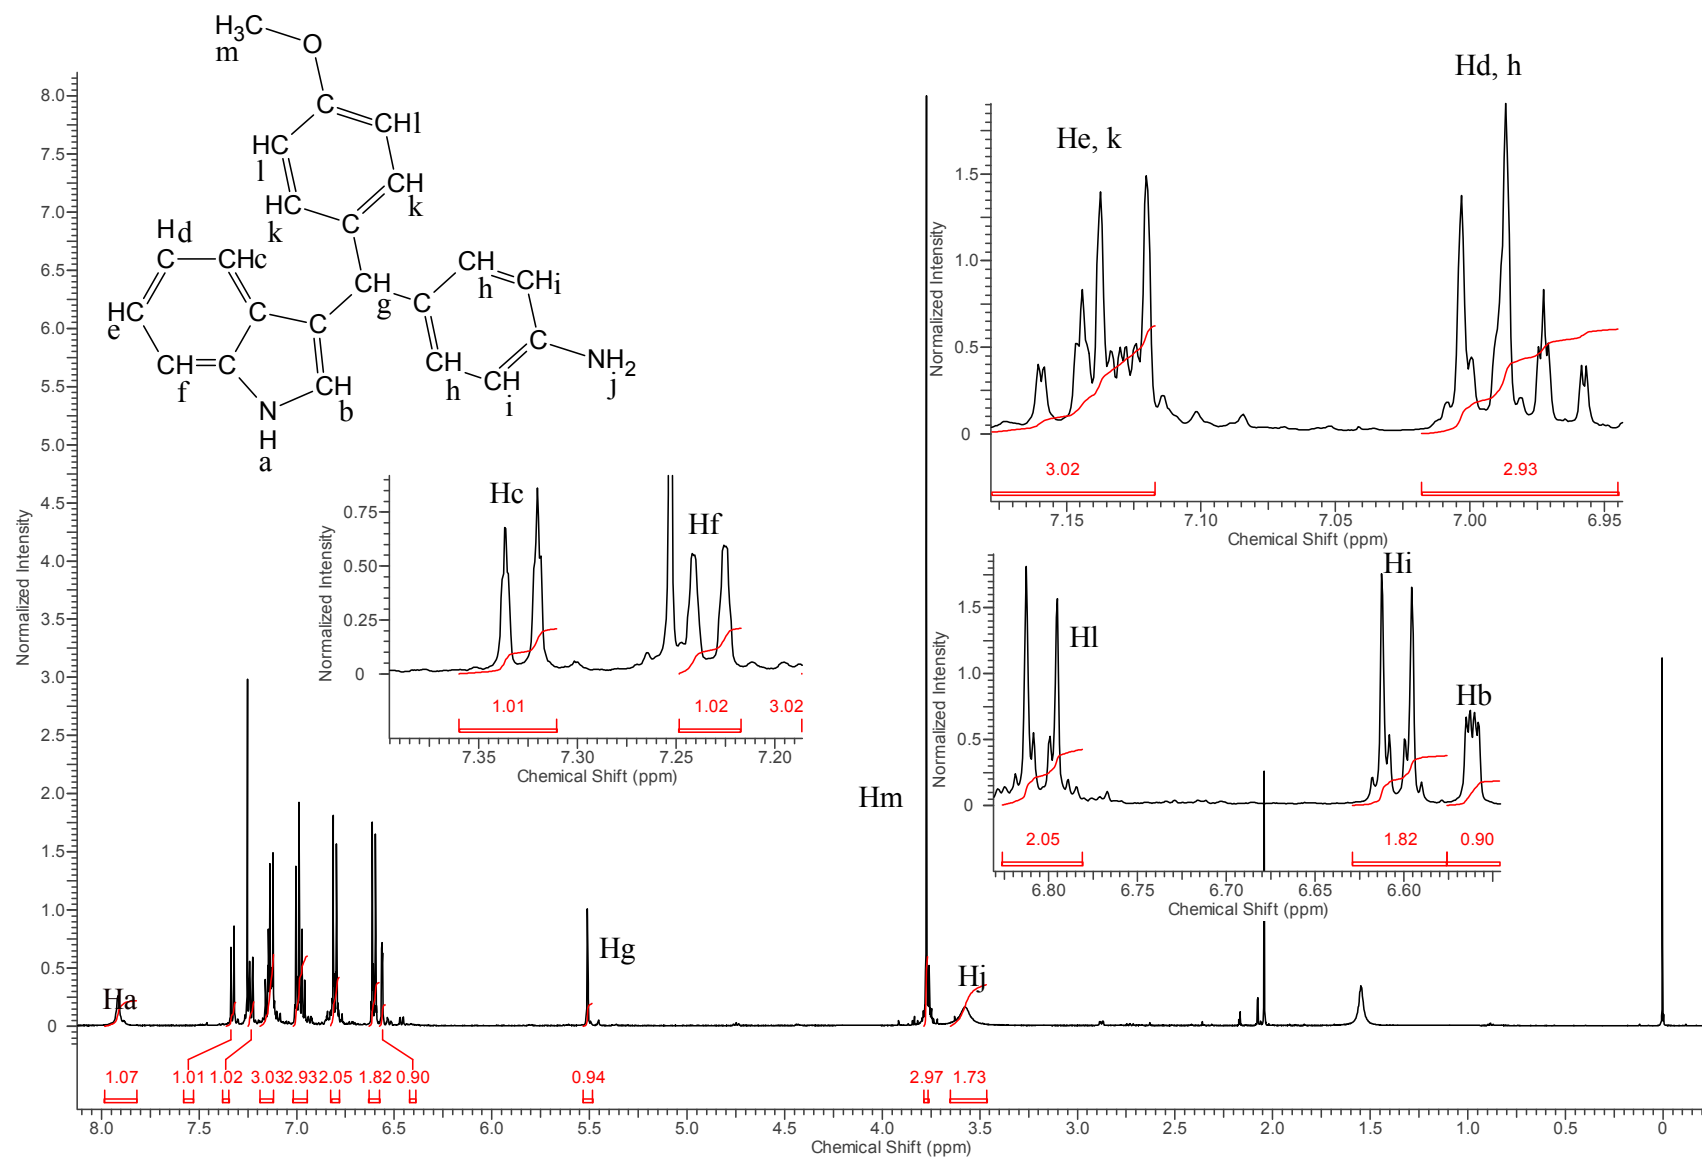

<sup>1</sup>H NMR (500MHz, CDCl<sub>3</sub>) δ = 7.92 (br s, 1 H), 7.33 (d, *J* = 8.2 Hz, 1 H), 7.23 (d, *J* = 7.9 Hz, 1 H), 7.19 - 7.12 (m, 3 H), 7.02 - 6.94 (m, 3 H), 6.81 (d, *J* = 8.9 Hz, 2 H), 6.61 (d, *J* = 8.5 Hz, 2 H), 6.56 (dd, *J* = 1.1, 2.3 Hz, 1 H), 5.51 (s, 1 H), 3.77 (s, 3 H), 3.58 (br s, 2 H).

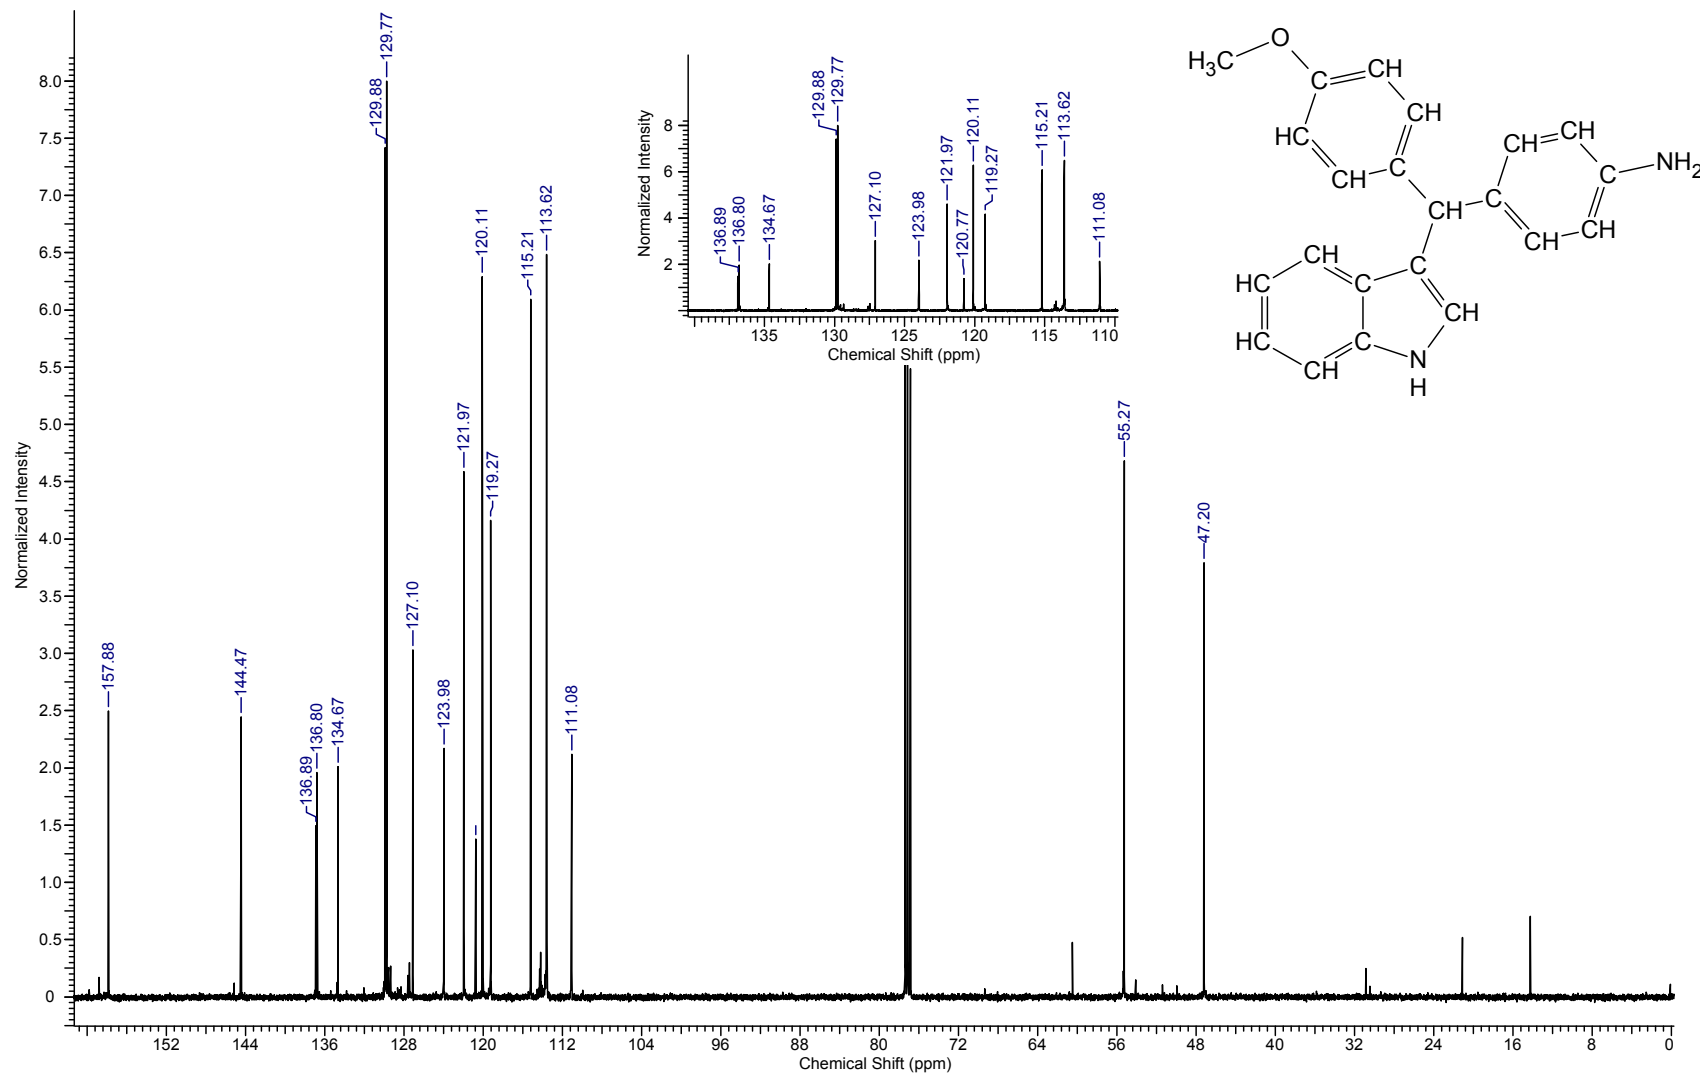

<sup>13</sup>C NMR (126 MHz, CDCl<sub>3</sub>) δ = 157.88, 144.47, 136.89, 136.80, 134.67, 129.88, 129.77, 127.10, 123.98, 121.97, 120.77, 120.11, 119.27, 115.21, 113.62, 111.08, 55.27, 47.20.

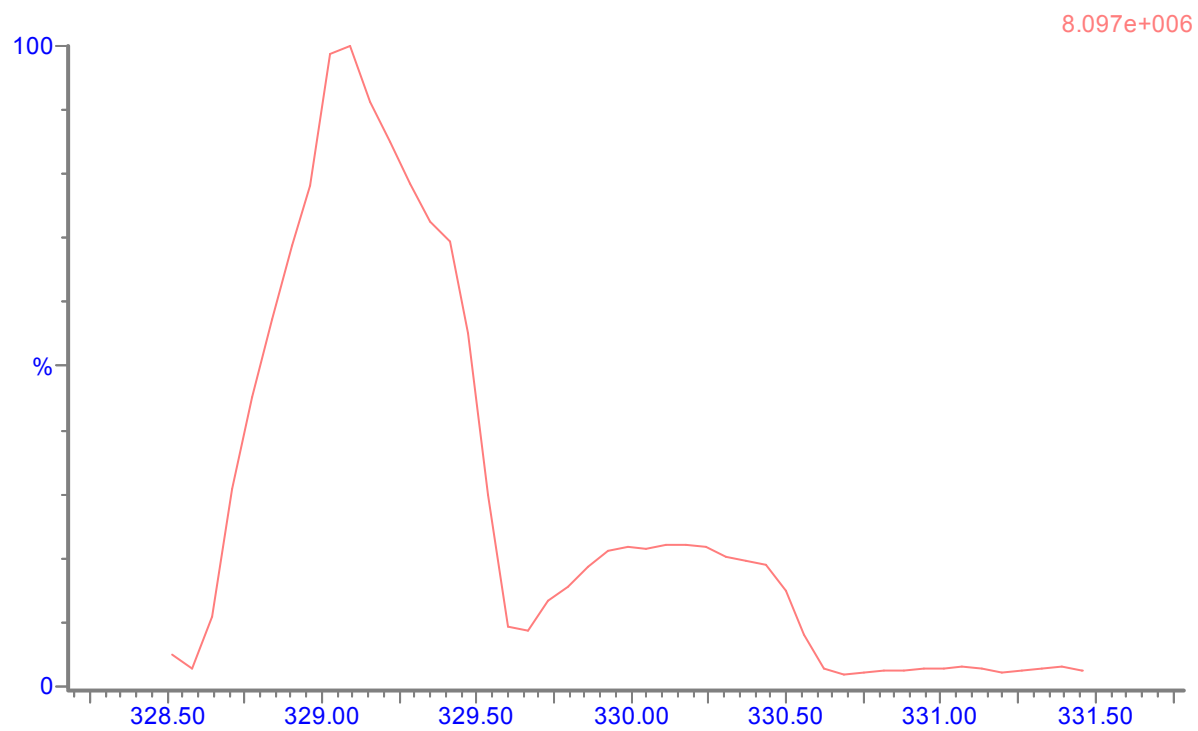

| Formula Mass | Daughter number | Parent m/z | Cone Voltage (V) | Daughters | Collision Energy (eV) | Ion Mode |
|--------------|-----------------|------------|------------------|-----------|-----------------------|----------|
| 328.41       | 1               | 329.07     | 44               | 212.14    | 22                    | ES+      |
|              | 2               | 329.07     | 44               | 236.14    | 22                    | ES+      |
|              | 3               | 329.07     | 44               | 168.24    | 50                    | ES+      |
|              | 4               | 329.07     | 44               | 197.06    | 36                    | ES+      |
|              | 5               | 329.07     | 44               | 221.12    | 20                    | ES+      |

### 3.7 4-bromobenzaldehyde (1n) + indole (2a) + aniline (3e): (6gg) 4-[1H-indol-3-yl(4-bromophenyl)methyl]aniline

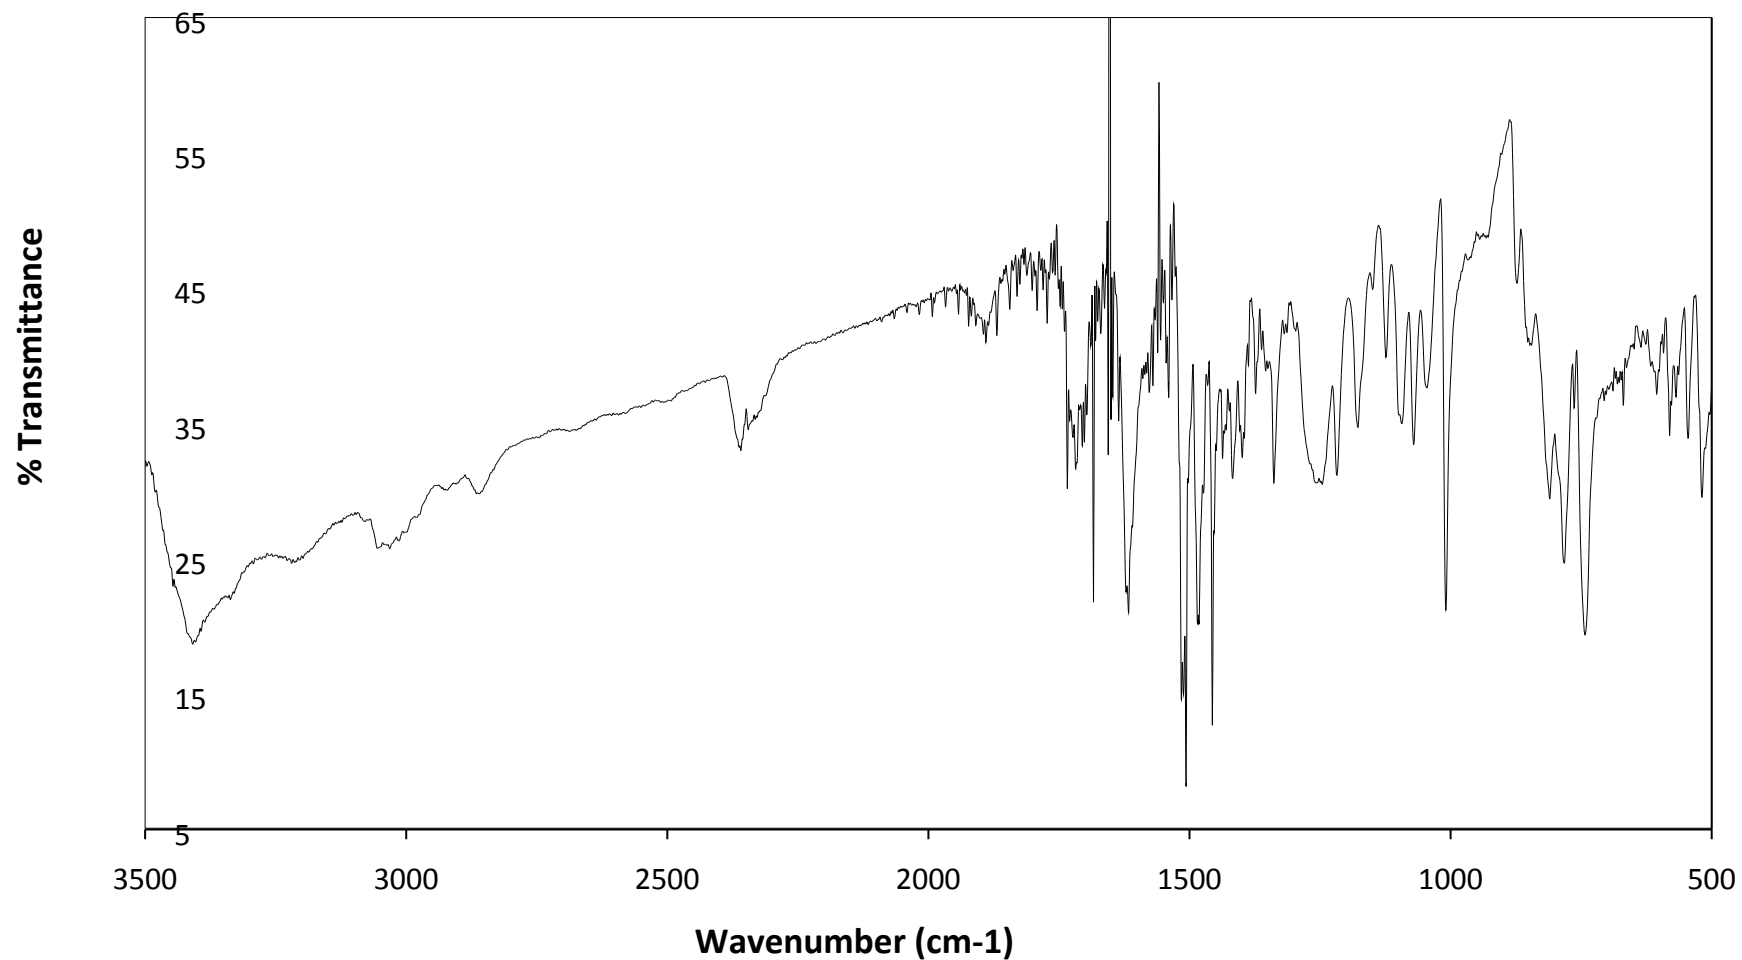

IR (KBr, cm<sup>-1</sup>): 3408 (br, m), 3340 (m), 3051 (m), 3032 (m), 3012 (m), 2999 (m), 2978 (m), 2920 (m), 2858 (m), 1890 (w), 1734 (m), 1718 (m), 1701 (m), 1683 (m), 1616 (m), 1516 (s), 1506 (s), 1481 (m), 1456 (s), 1436 (m), 1417 (m), 1398 (m), 1373 (w), 1338 (m), 1257 (m), 1246 (m), 1217 (m), 1178 (m), 1149 (w), 1122 (w), 1093 (m), 1070 (m), 1047 (m), 1008 (m), 871 (w), 844 (w), 810 (m), 783 (m), 742 (m), 669 (m), 603 (m).

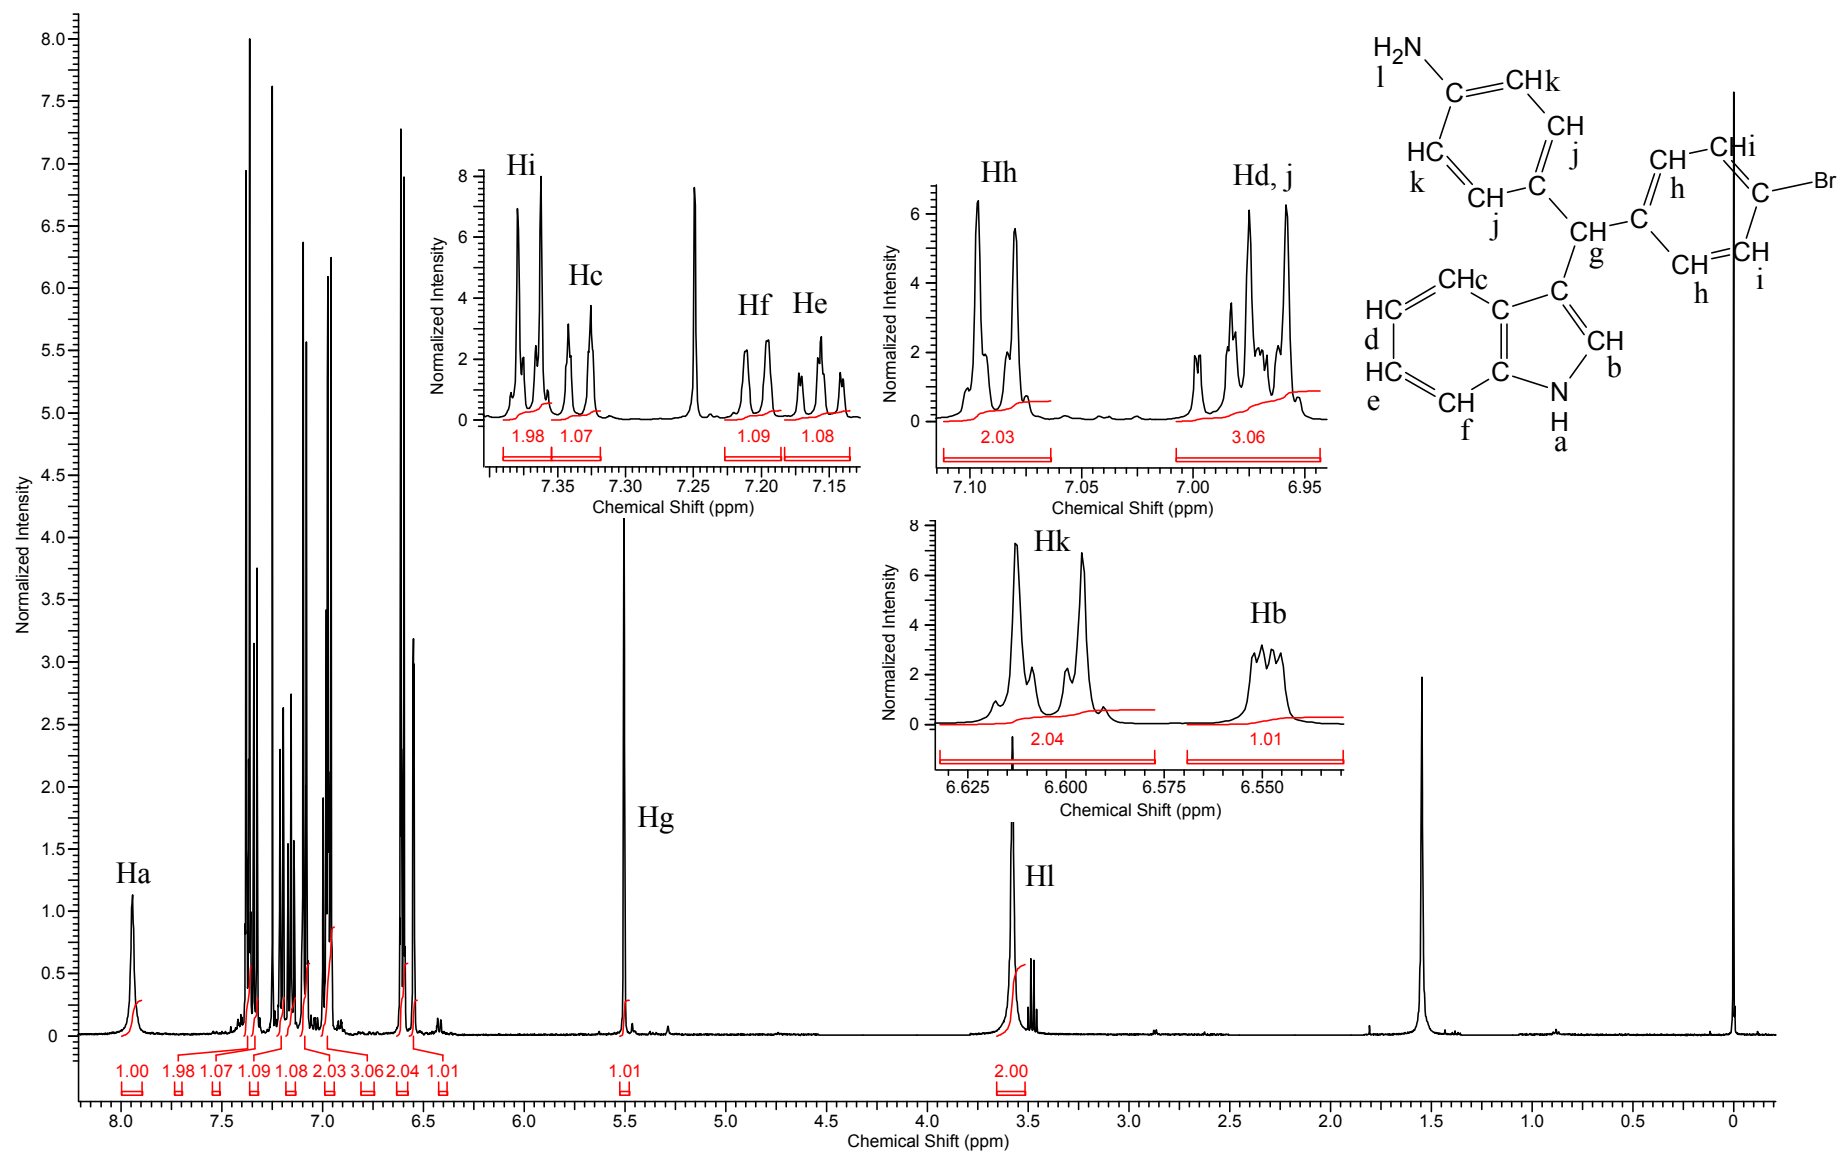

<sup>1</sup>H NMR (500MHz, CDCl<sub>3</sub>)  $\delta$  = 7.94 (br s, 1 H), 7.37 (d,  $J$  = 8.2 Hz, 2 H), 7.34 (d,  $J$  = 8.2 Hz, 1 H), 7.21 (d,  $J$  = 7.9 Hz, 1 H), 7.16 (ddd,  $J$  = 0.9, 7.1, 7.9 Hz, 1 H), 7.09 (d,  $J$  = 8.2 Hz, 2 H), 7.01 - 6.94 (m, 3 H), 6.61 (d,  $J$  = 8.5 Hz, 2 H), 6.55 (dd,  $J$  = 1.1, 2.3 Hz, 1 H), 5.50 (s, 1 H), 3.58 (br s, 2 H).

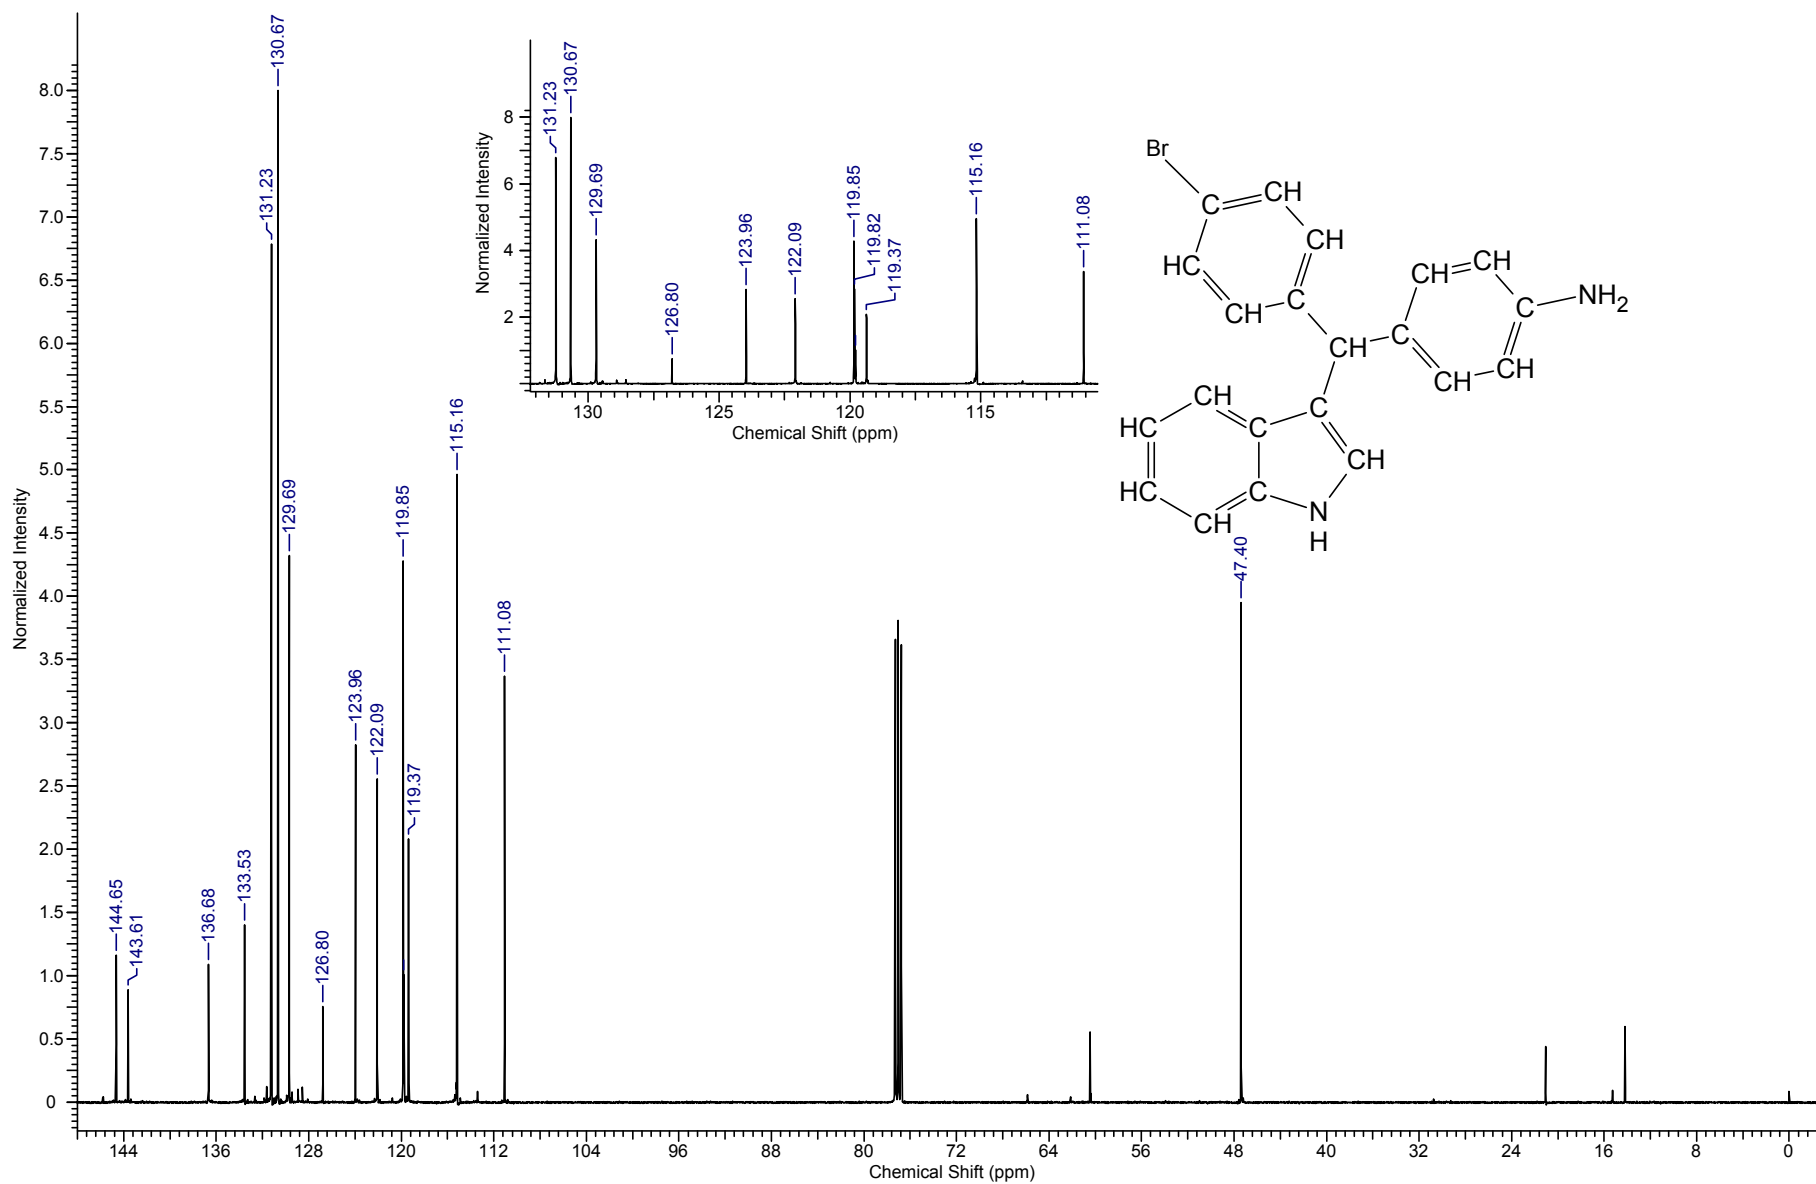

$^{13}\text{C}$  NMR (126 MHz,  $\text{CDCl}_3$ )  $\delta$  = 144.67, 144.65, 143.63, 143.61, 136.68, 133.53, 131.23, 130.67, 129.69, 123.96, 122.09, 119.85, 119.82, 119.37, 115.16, 111.08, 47.40.



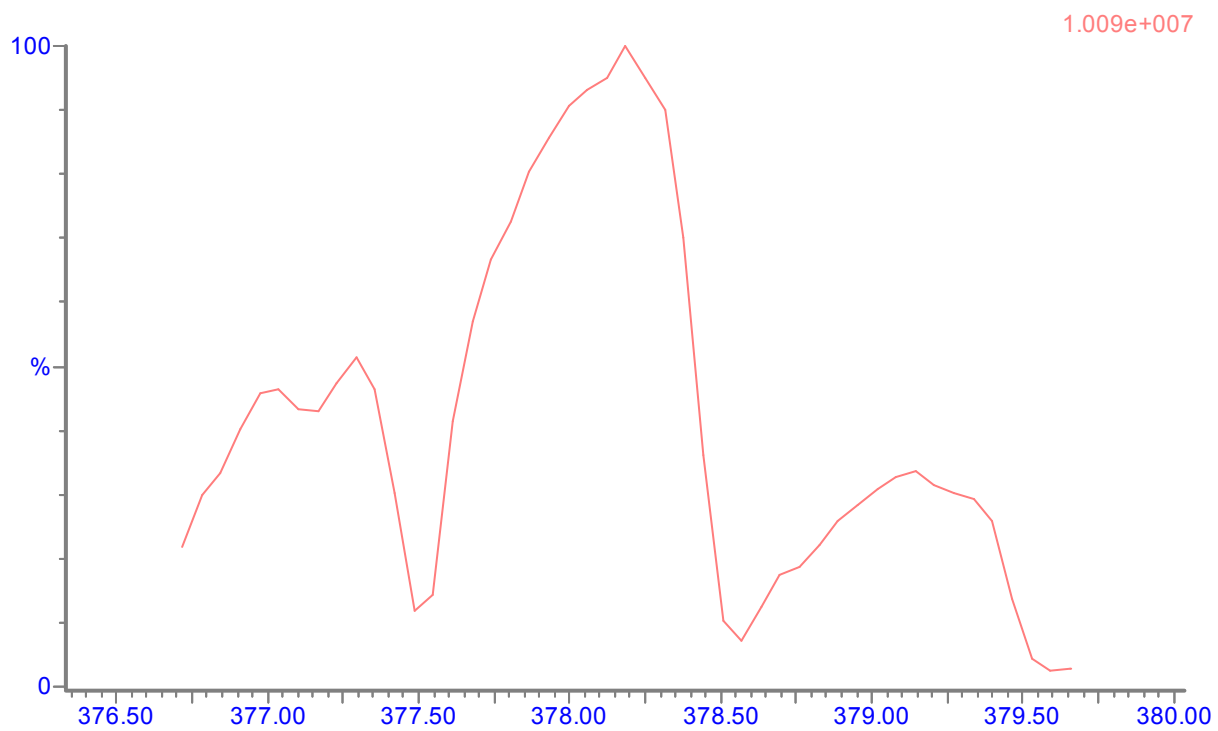

| Formula Mass | Daughter number | Parent m/z | Cone Voltage (V) | Daughters | Collision Energy (eV) | Ion Mode |
|--------------|-----------------|------------|------------------|-----------|-----------------------|----------|
| 377.28       | 1               | 378.04     | 60               | 221.13    | 26                    | ES+      |
|              | 2               | 378.04     | 60               | 180.09    | 38                    | ES+      |
|              | 3               | 378.04     | 60               | 204.16    | 38                    | ES+      |
|              | 4               | 378.04     | 60               | 285.84    | 30                    | ES+      |

**3.8 3,4-dichlorobenzaldehyde (1o) + indole (2a) + aniline (3e): (6hh) 4-[1*H*-indol-3-yl(3,4-dichlorophenyl)methyl]aniline**

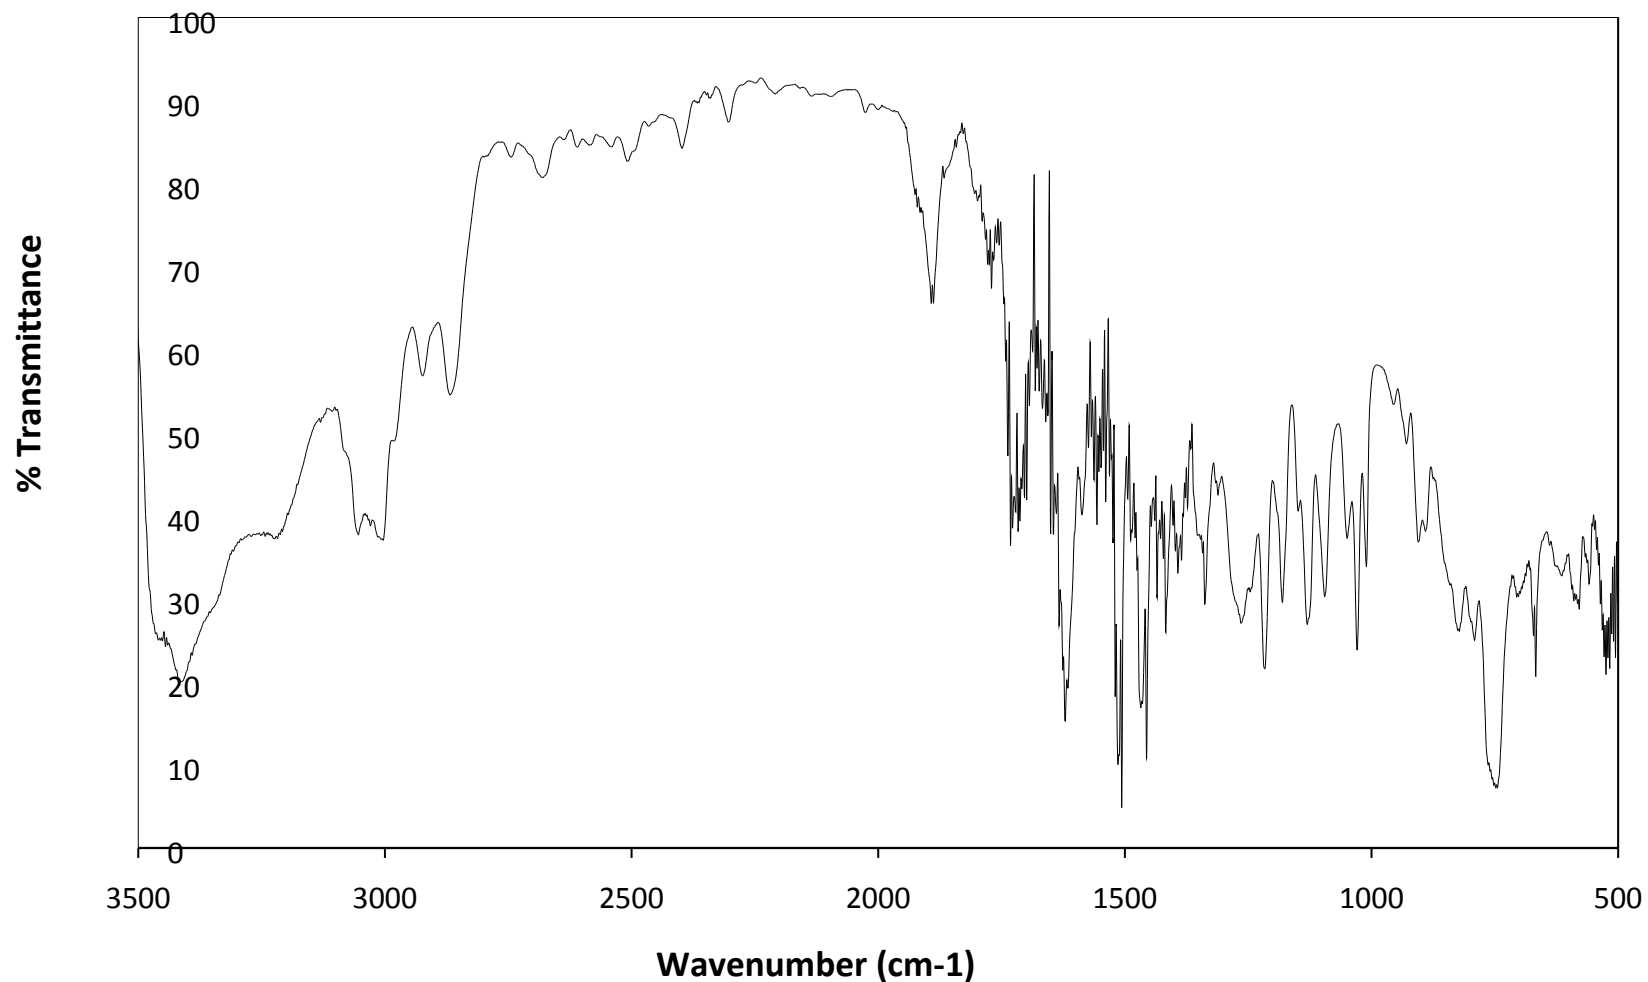

IR (KBr,  $\text{cm}^{-1}$ ): 3444 (m), 3408 (m), 3224 (m), 3053 (m), 3003 (m), 2924 (w), 2866 (w), 1732 (m), 1716 (m), 1620 (m), 1514 (s), 1506 (s), 1467 (s), 1456 (s), 1417 (m), 1392 (m), 1338 (m), 1265 (m), 1219 (m), 1180 (m), 1130 (m), 1049 (m), 1029 (m), 1010 (m), 904 (m), 889 (m), 825 (m), 790 (m), 744 (s), 705 (m), 667 (m).

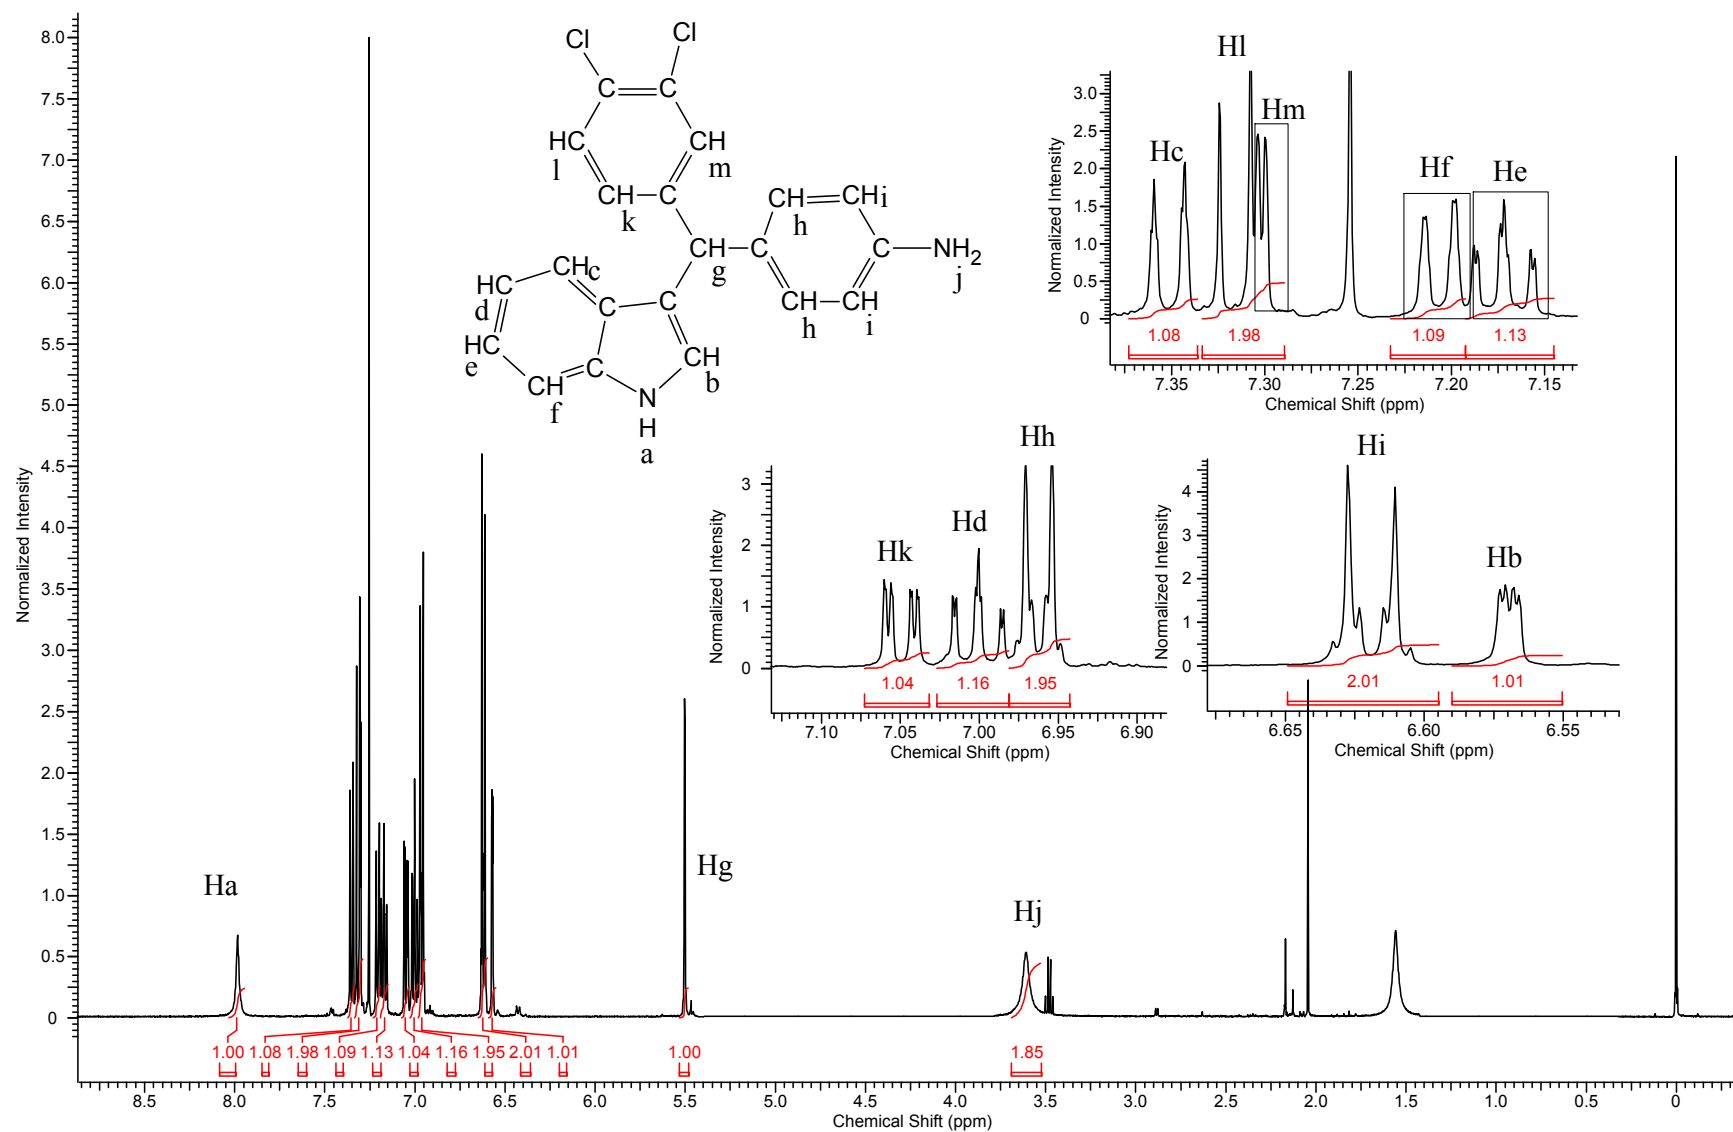

$^1\text{H}$  NMR (500MHz,  $\text{CDCl}_3$ )  $\delta = 7.98$  (br s, 1 H), 7.35 (d,  $J = 8.2$  Hz, 1 H), 7.32 (d,  $J = 8.5$  Hz, 1 H), 7.30 (d,  $J = 2.1$  Hz, 1H) 7.21 (d,  $J = 7.9$  Hz, 1 H), 7.17 (ddd,  $J = 0.9, 7.1, 7.9$  Hz, 1 H), 7.04 (ddd,  $J = 0.6, 2.1, 8.3$  Hz, 1 H), 7.00 (ddd,  $J = 1.1, 7.1, 8.2$  Hz, 1 H), 6.96 (d,  $J = 8.5$  Hz, 2 H), 6.62 (d,  $J = 8.5$  Hz, 2 H), 6.57 (dd,  $J = 0.9, 2.4$  Hz, 1 H), 5.50 (s, 1 H), 3.61 (br s, 2 H).

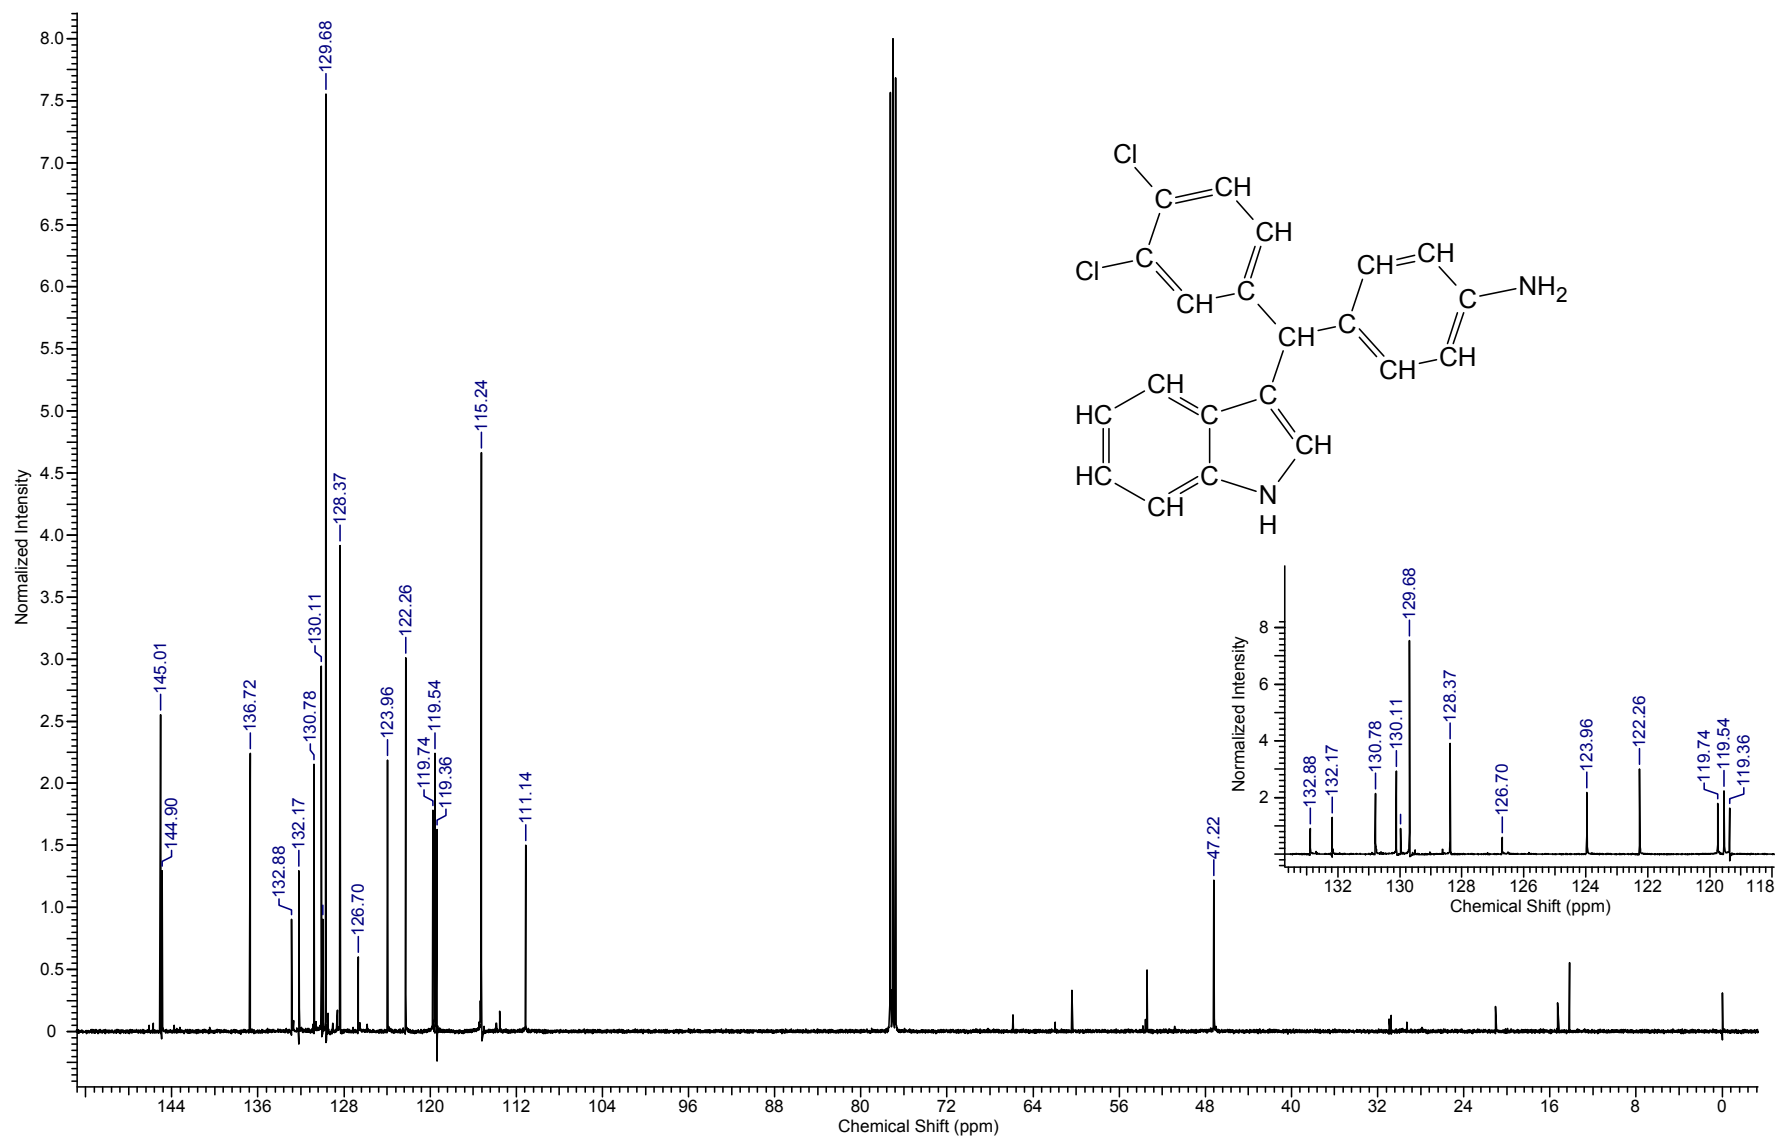

<sup>13</sup>C NMR (126 MHz, CDCl<sub>3</sub>) δ = 145.01, 144.90, 136.72, 132.88, 132.17, 130.78, 130.11, 129.96, 129.68, 128.37, 126.70, 123.96, 122.26, 119.74, 119.54, 119.36, 115.24, 111.14, 47.22.

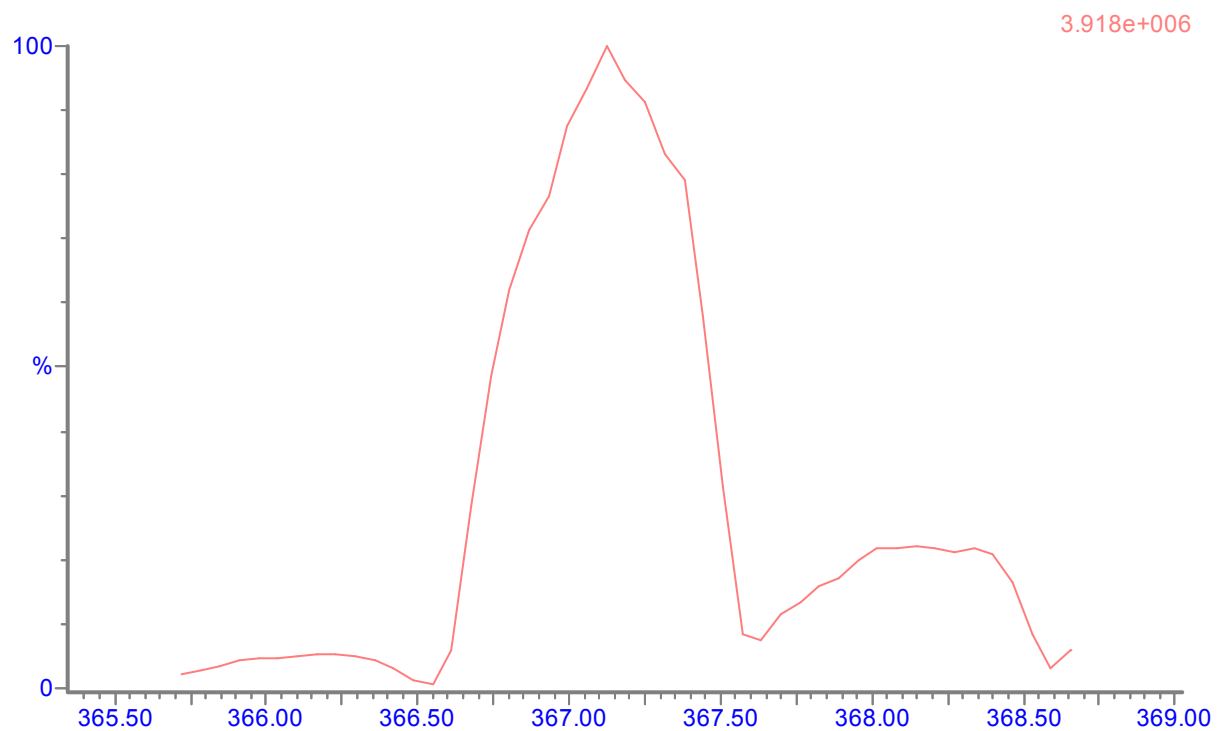

| Formula Mass | Daughter number | Parent m/z | Cone Voltage (V) | Daughters | Collision Energy (eV) | Ion Mode |
|--------------|-----------------|------------|------------------|-----------|-----------------------|----------|
| 366.20       | 1               | 367.10     | 44               | 250.06    | 26                    | ES+      |
|              | 2               | 367.10     | 44               | 180.09    | 38                    | ES+      |
|              | 3               | 367.10     | 44               | 274.06    | 28                    | ES+      |
|              | 4               | 367.10     | 44               | 152.05    | 80                    | ES+      |
|              | 5               | 367.10     | 44               | 204.07    | 60                    | ES+      |

### 3.9 Benzaldehyde (1a) + indole (2a) + 3-methylaniline (3g): (6l) 4-[1*H*-indol-3-yl(phenyl)methyl]-3-methylaniline

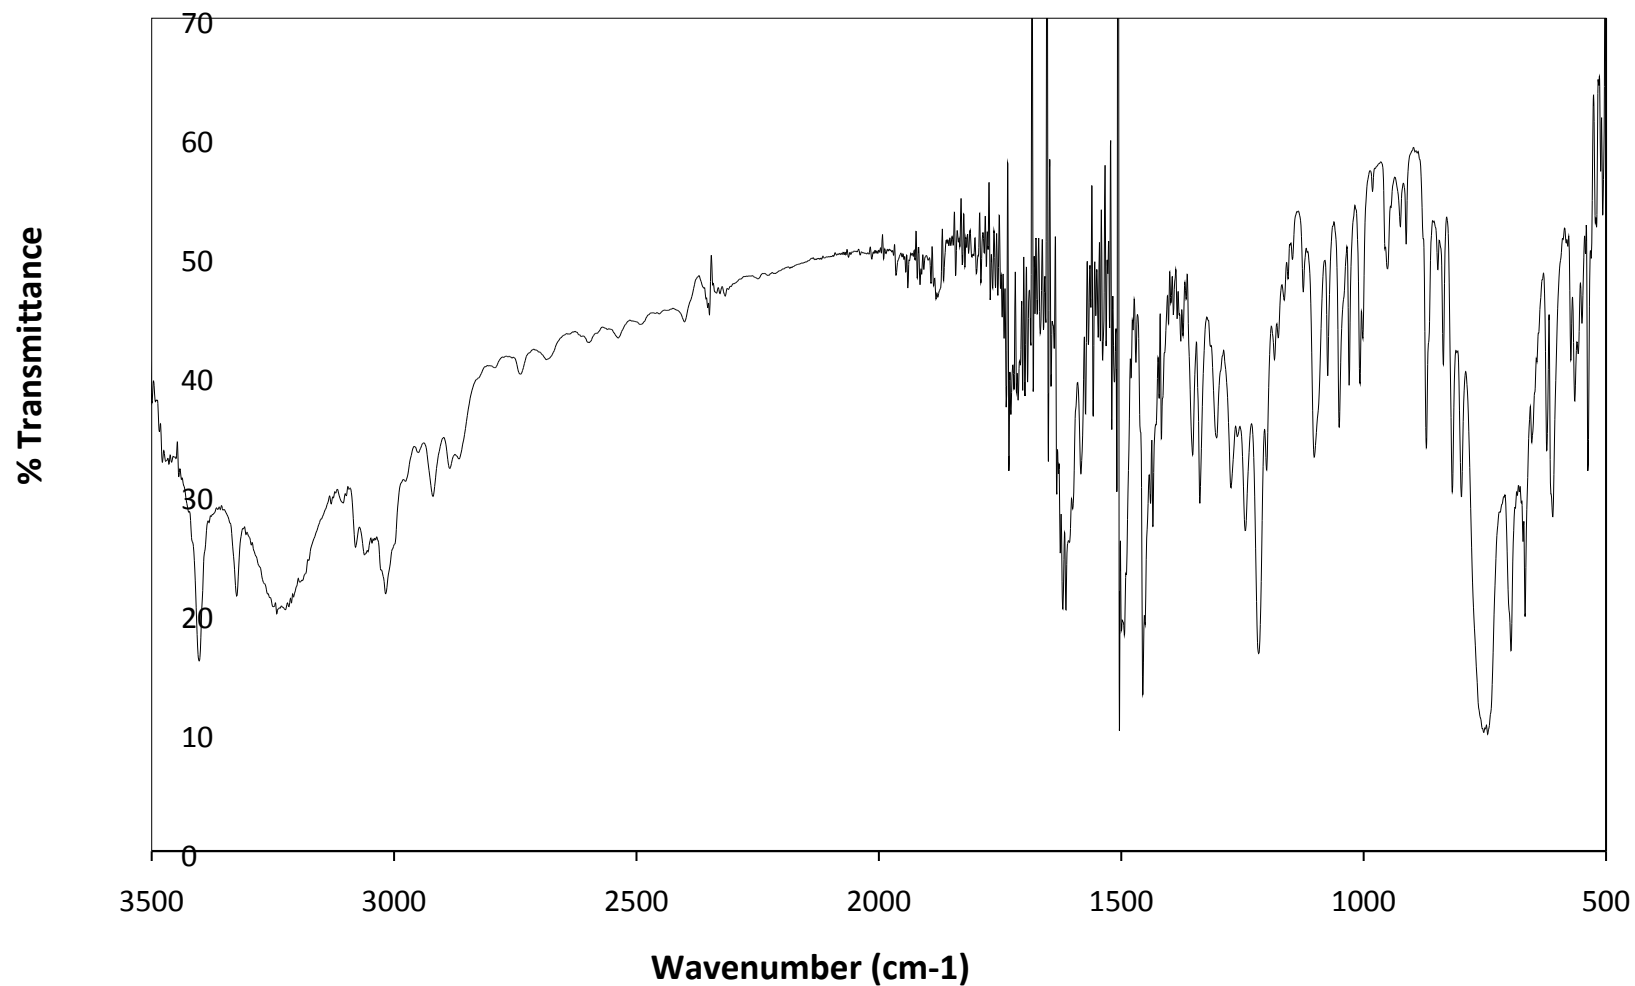

IR (KBr, cm<sup>-1</sup>): 3402 (s), 3325 (s), 3242 (br, s), 3078 (s), 3057 (s), 3016 (s), 2920 (m), 2887 (m), 1732 (m), 1620 (s), 1614 (s), 1583 (m), 1573 (m), 1519 (m), 1492 (s), 1456 (s), 1435 (m), 1417 (m), 1352 (m), 1338 (m), 1303 (m), 1273 (m), 1244 (m), 1217 (s), 1199 (s), 1184 (w), 1109 (w), 1101 (m), 1074 (m), 1051 (m), 1029 (m), 1006 (m), 952 (w), 923 (w), 912 (w), 869 (m), 835 (m), 817 (m), 798 (m), 752 (s), 696 (s), 667 (s), 653 (m), 623 (m), 609 (m).

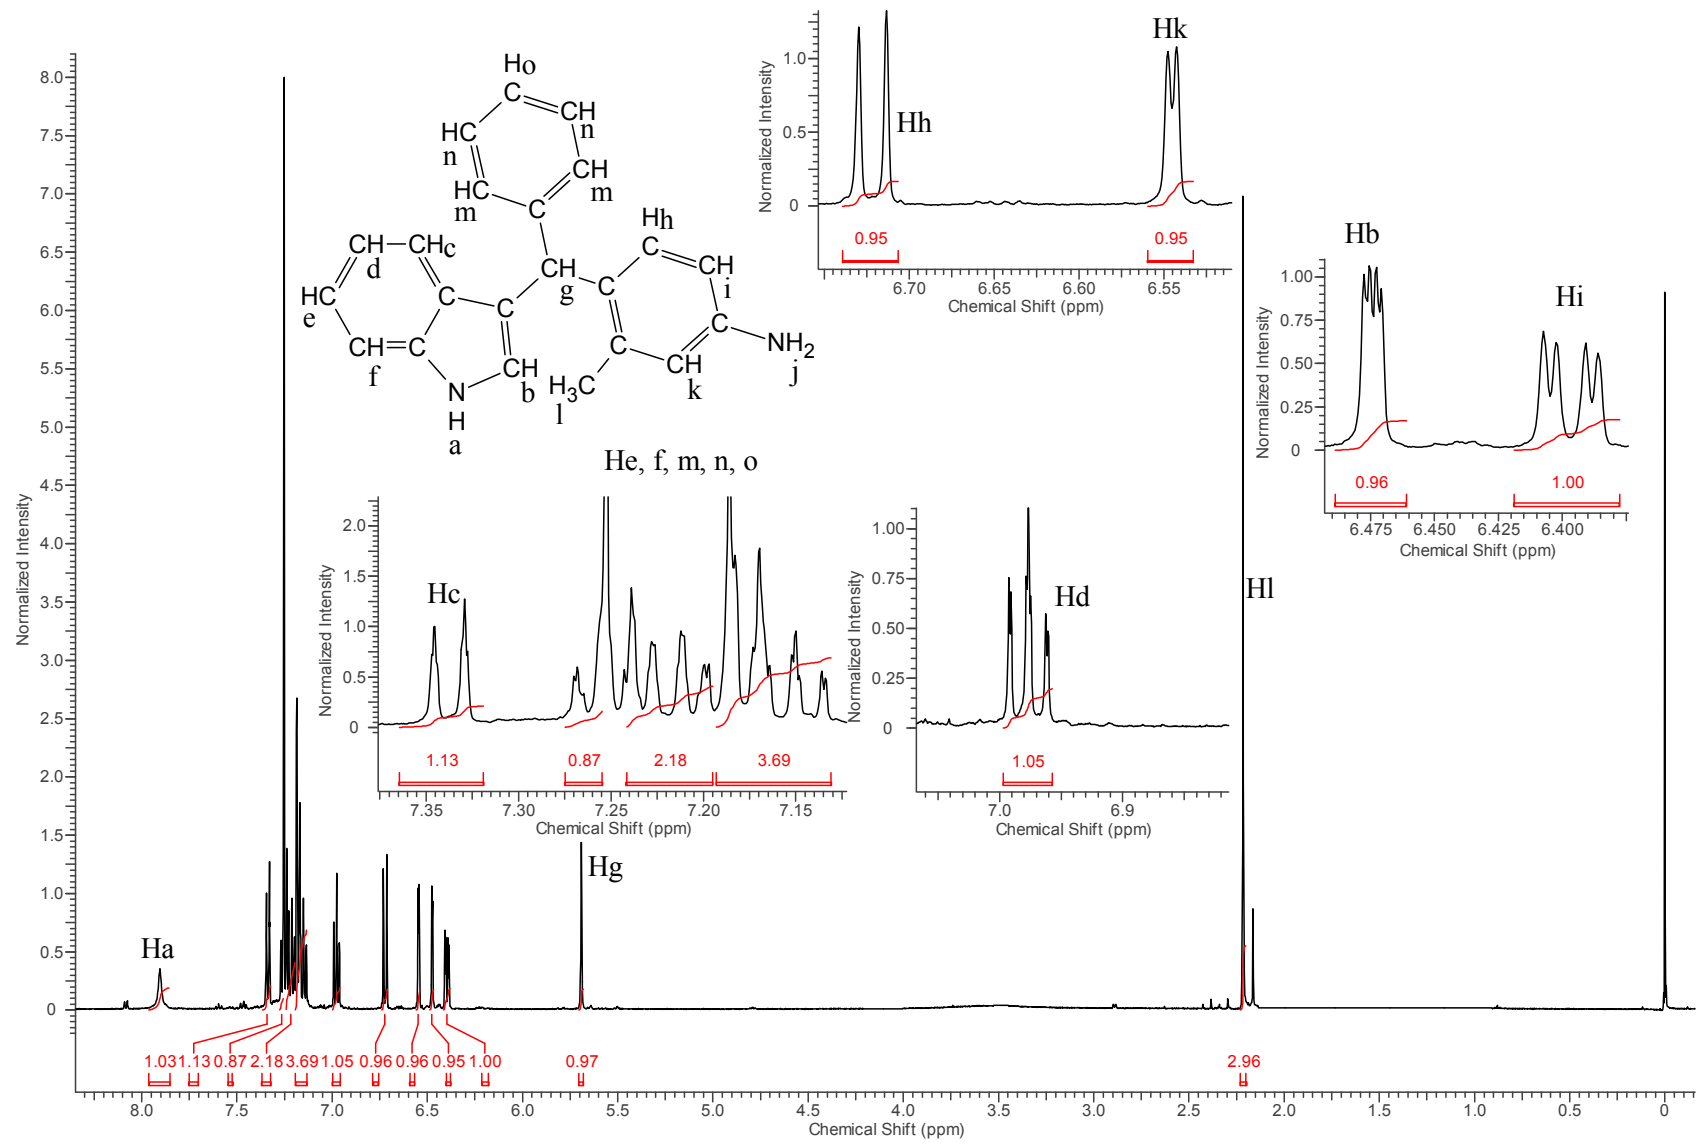

<sup>1</sup>H NMR (500MHz, CDCl<sub>3</sub>) δ = 7.90 (br s, 1 H), 7.33 (d, *J* = 8.2 Hz, 1 H), 7.27 – 7.13 (m, 7 H), 6.98 (ddd, *J* = 0.9, 7.0, 8.2 Hz, 1 H), 6.72 (d, *J* = 8.2 Hz, 1 H), 6.55 (d, *J* = 2.4 Hz, 1 H), 6.47 (dd, *J* = 0.9, 2.4 Hz, 1 H), 6.40 (dd, *J* = 2.4, 8.2 Hz, 1 H), 5.69 (s, 1 H), 2.22 (s, 3 H).

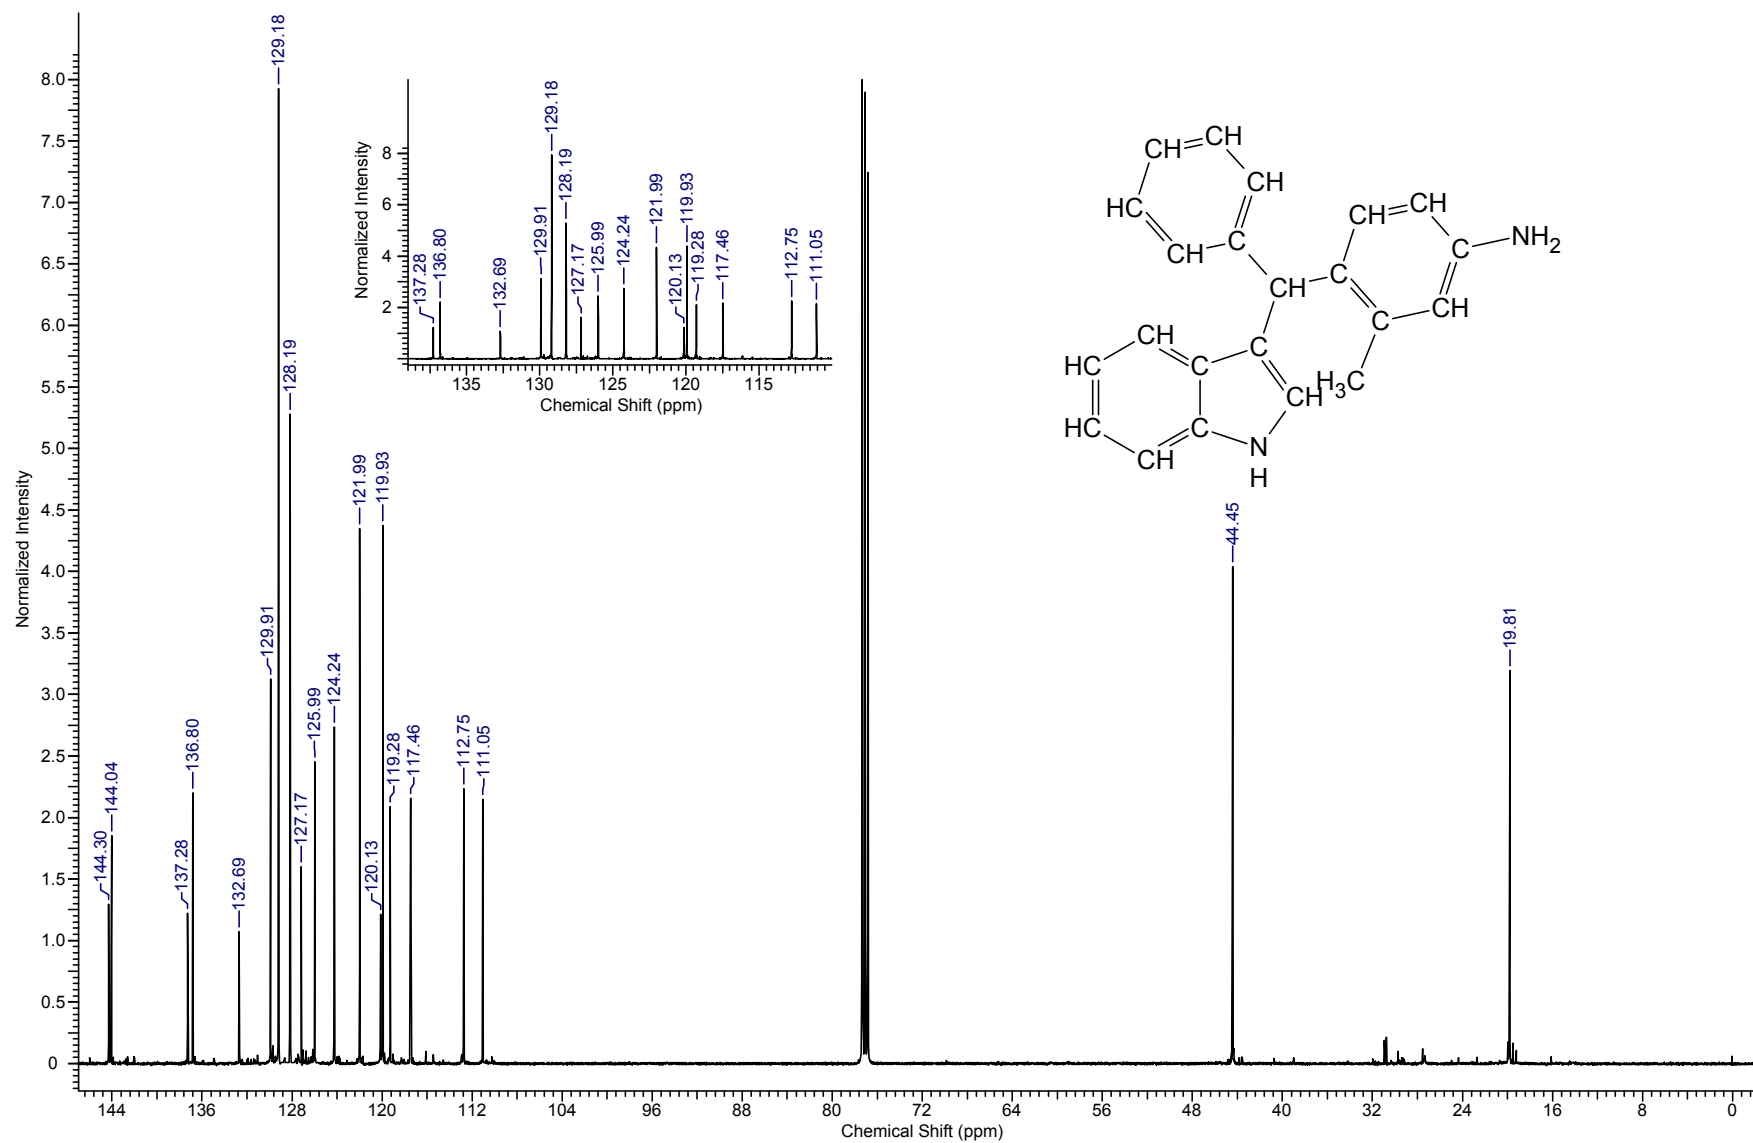

$^{13}\text{C}$  NMR (126 MHz,  $\text{CDCl}_3$ )  $\delta$  = 144.30, 144.04, 137.28, 136.80, 132.69, 129.91, 129.18, 128.19, 127.17, 125.99, 124.24, 121.99, 120.13, 119.93, 119.28, 117.46, 112.75, 111.05, 44.45, 19.81.



The mass spectrum of this compound was obtained using a direct probe. The following peaks were obtained:

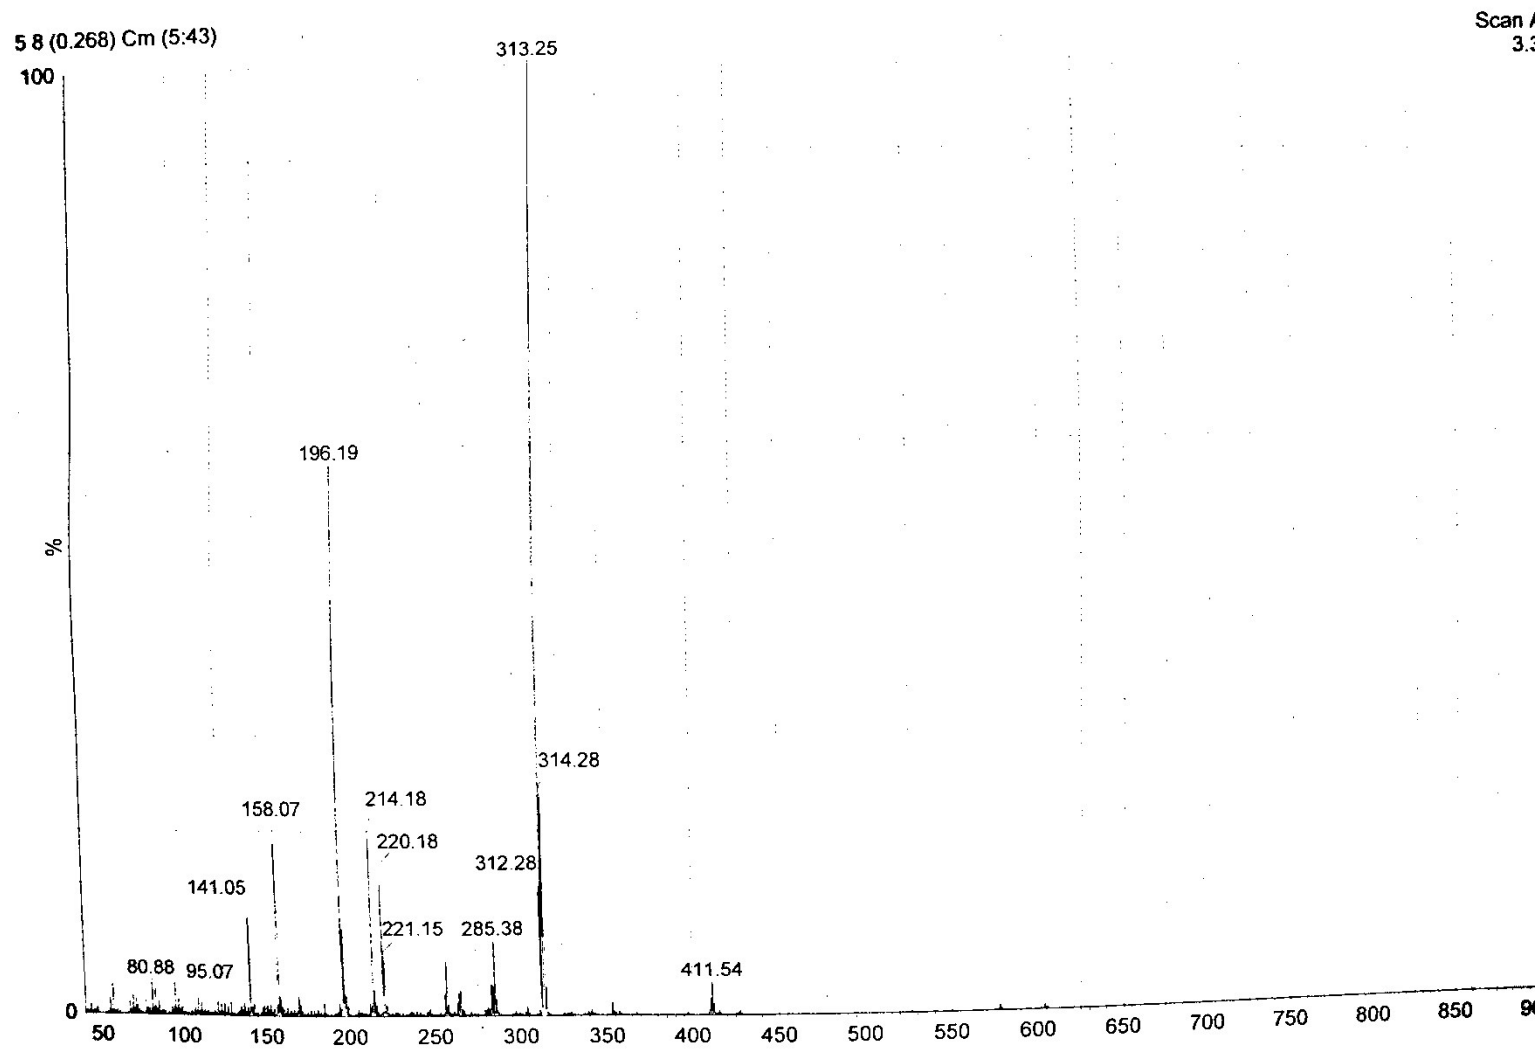

**3.10 3-methylbenzaldehyde (1c) + indole (2a) + 3-methylaniline (3g): (6mm) 4-[1*H*-indol-3-yl(3-methylphenyl)methyl]-3-methylaniline**

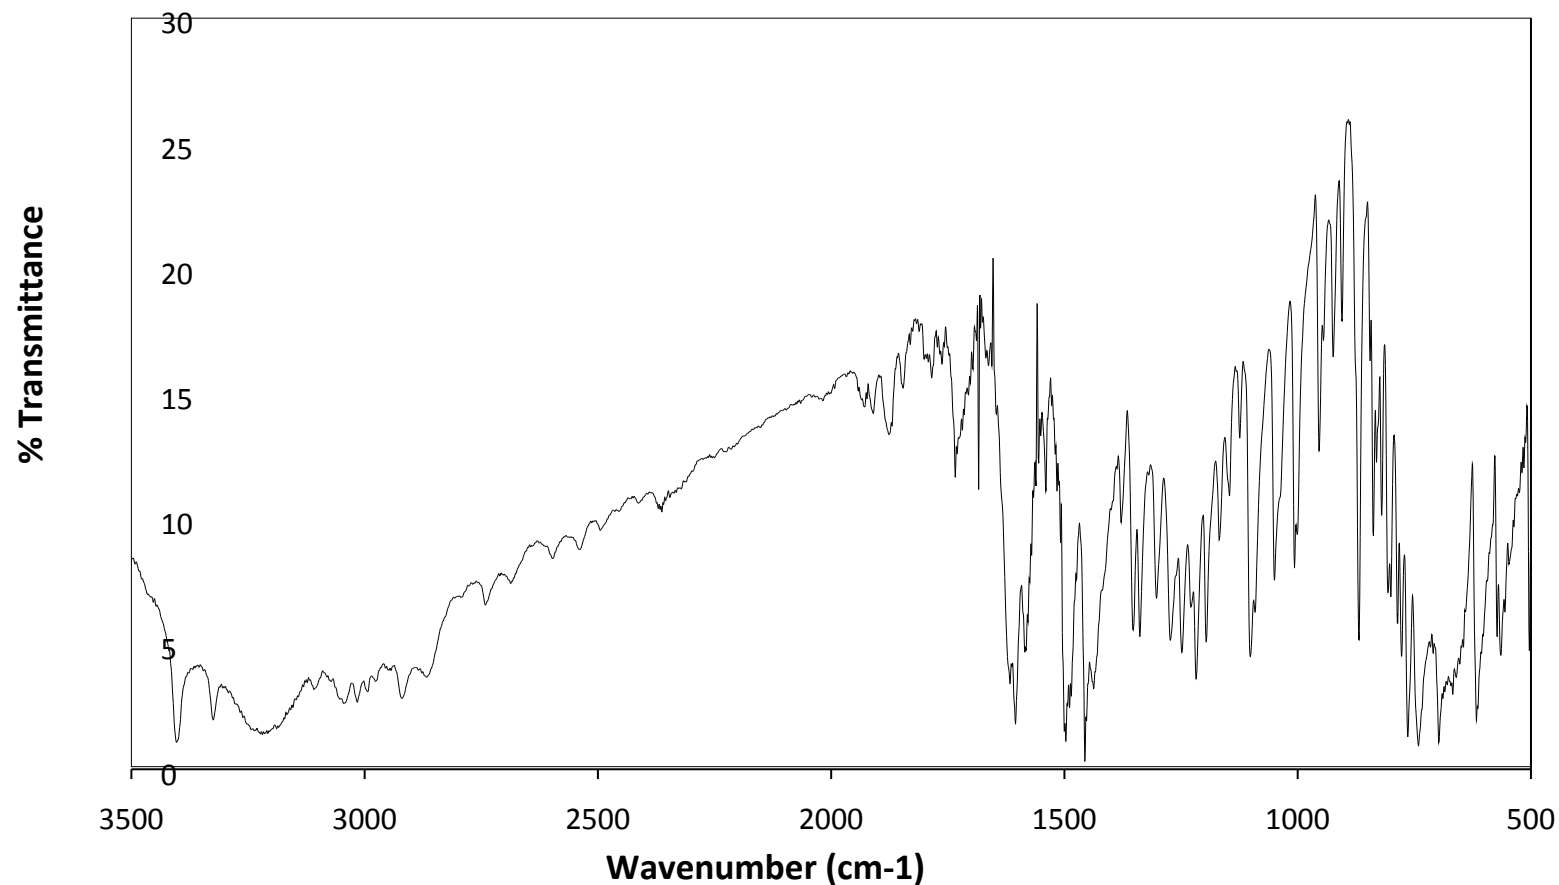

IR (KBr, cm<sup>-1</sup>): 3402 (s), 3325 (s), 3219 (br, s), 3105 (s), 3043 (s), 3014 (s), 2993 (s), 2920 (s), 2866 (s), 1734 (m), 1683 (m), 1608 (s), 1606 (s), 1581 (s), 1516 (m), 1496 (s), 1456 (s), 1436 (s), 1379 (s), 1352 (m), 1338 (m), 1301 (m), 1273 (m), 1247 (m), 1217 (m), 1195 (m), 1166 (m), 1145 (m), 1124 (m), 1101 (m), 1049 (m), 1006 (m), 954 (m), 923 (w), 904 (w), 867 (m), 837 (m), 819 (m), 800 (m), 763 (s), 740 (s), 698 (s), 667 (s), 617 (s).

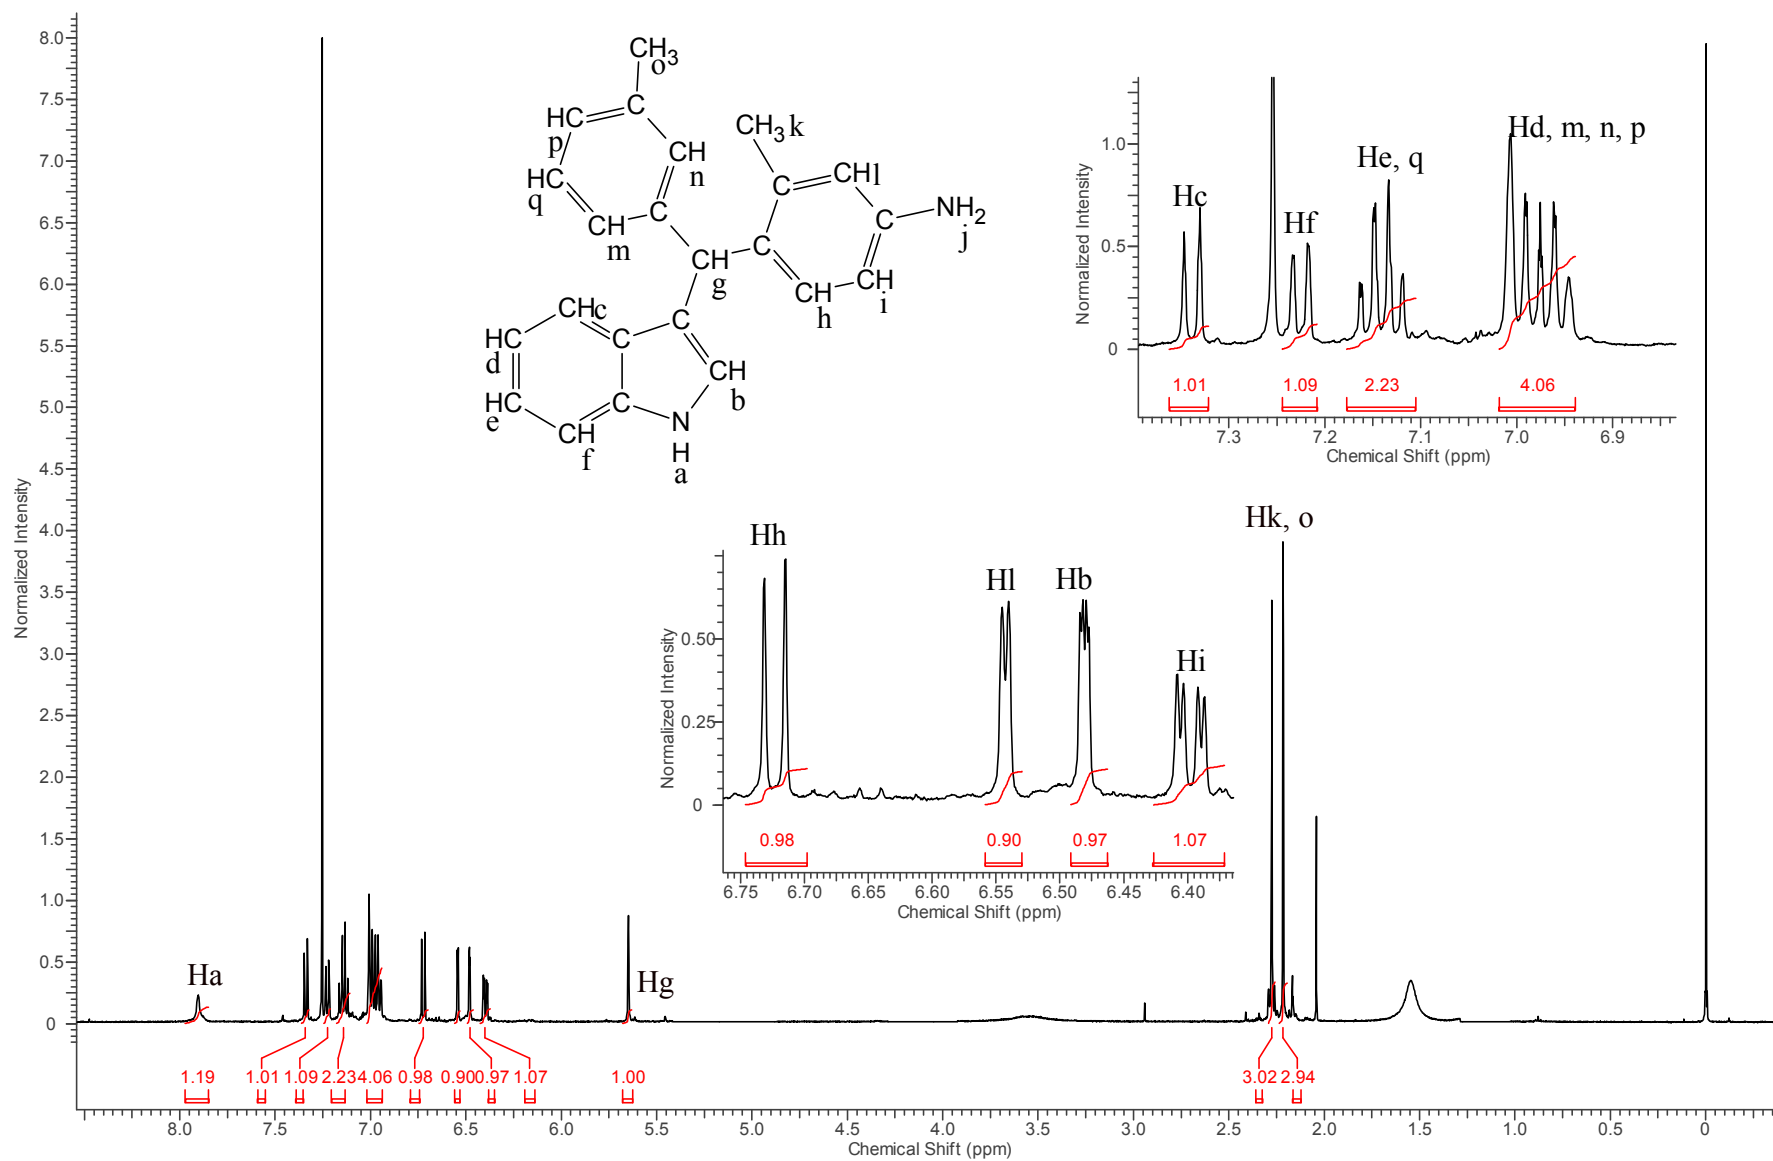

<sup>1</sup>H NMR (500MHz, CDCl<sub>3</sub>) δ = 7.90 (br s, 1 H), 7.34 (d, *J* = 8.2 Hz, 1 H), 7.24 (d, *J* = 7.9 Hz, 1 H), 7.18 - 7.10 (m, 2 H), 7.02 - 6.94 (m, 4 H), 6.72 (d, *J* = 8.2 Hz, 1 H), 6.54 (d, *J* = 2.4 Hz, 1 H), 6.48 (dd, *J* = 1.1, 2.3 Hz, 1 H), 6.40 (dd, *J* = 2.4, 8.2 Hz, 1 H), 6.56 (s, 1 H), 2.27 (s, 3 H), 2.22 (s, 3 H).

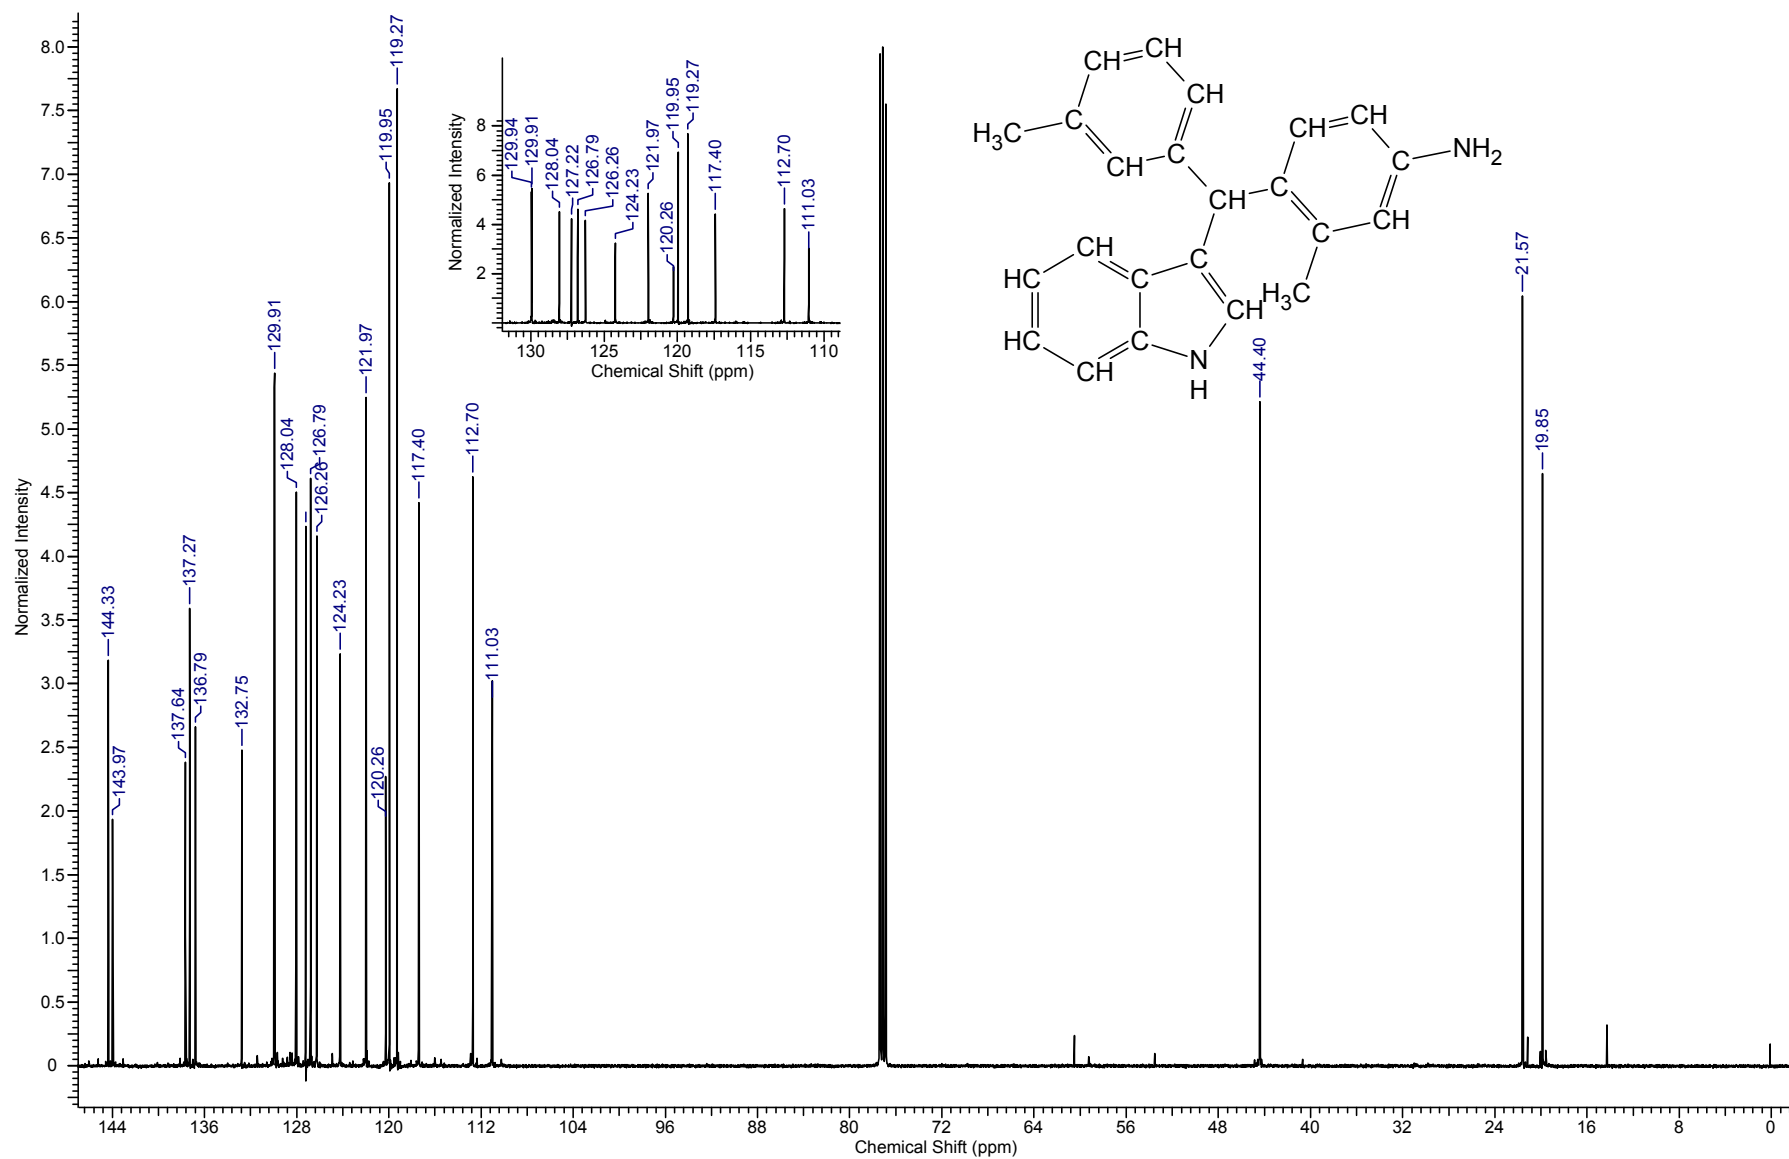

$^{13}\text{C}$  NMR (126 MHz,  $\text{CDCl}_3$ )  $\delta$  = 144.33, 143.97, 137.64, 137.27, 136.79, 132.75, 129.94, 129.91, 128.04, 127.22, 126.79, 126.26, 124.23, 121.97, 120.26, 119.95, 119.27, 117.40, 112.70, 111.03, 44.40, 21.57, 19.85.



| Formula Mass | Daughter number | Parent m/z | Cone Voltage (V) | Daughters | Collision Energy (eV) | Ion Mode |
|--------------|-----------------|------------|------------------|-----------|-----------------------|----------|
| 326.43       | 1               | 327.15     | 44               | 220.88    | 32                    | ES+      |
|              | 2               | 327.15     | 44               | 312.06    | 22                    | ES+      |
|              | 3               | 327.15     | 44               | 210.15    | 22                    | ES+      |
|              | 4               | 327.15     | 44               | 204.03    | 58                    | ES+      |
|              | 5               | 327.15     | 44               | 297.04    | 32                    | ES+      |

**3.11 3-methoxybenzaldehyde (1h) + indole (2a) + 3-methylaniline (3g): (6nn) 4-[1H-indol-3-yl(3-methoxyphenyl)methyl]-3-methylaniline**

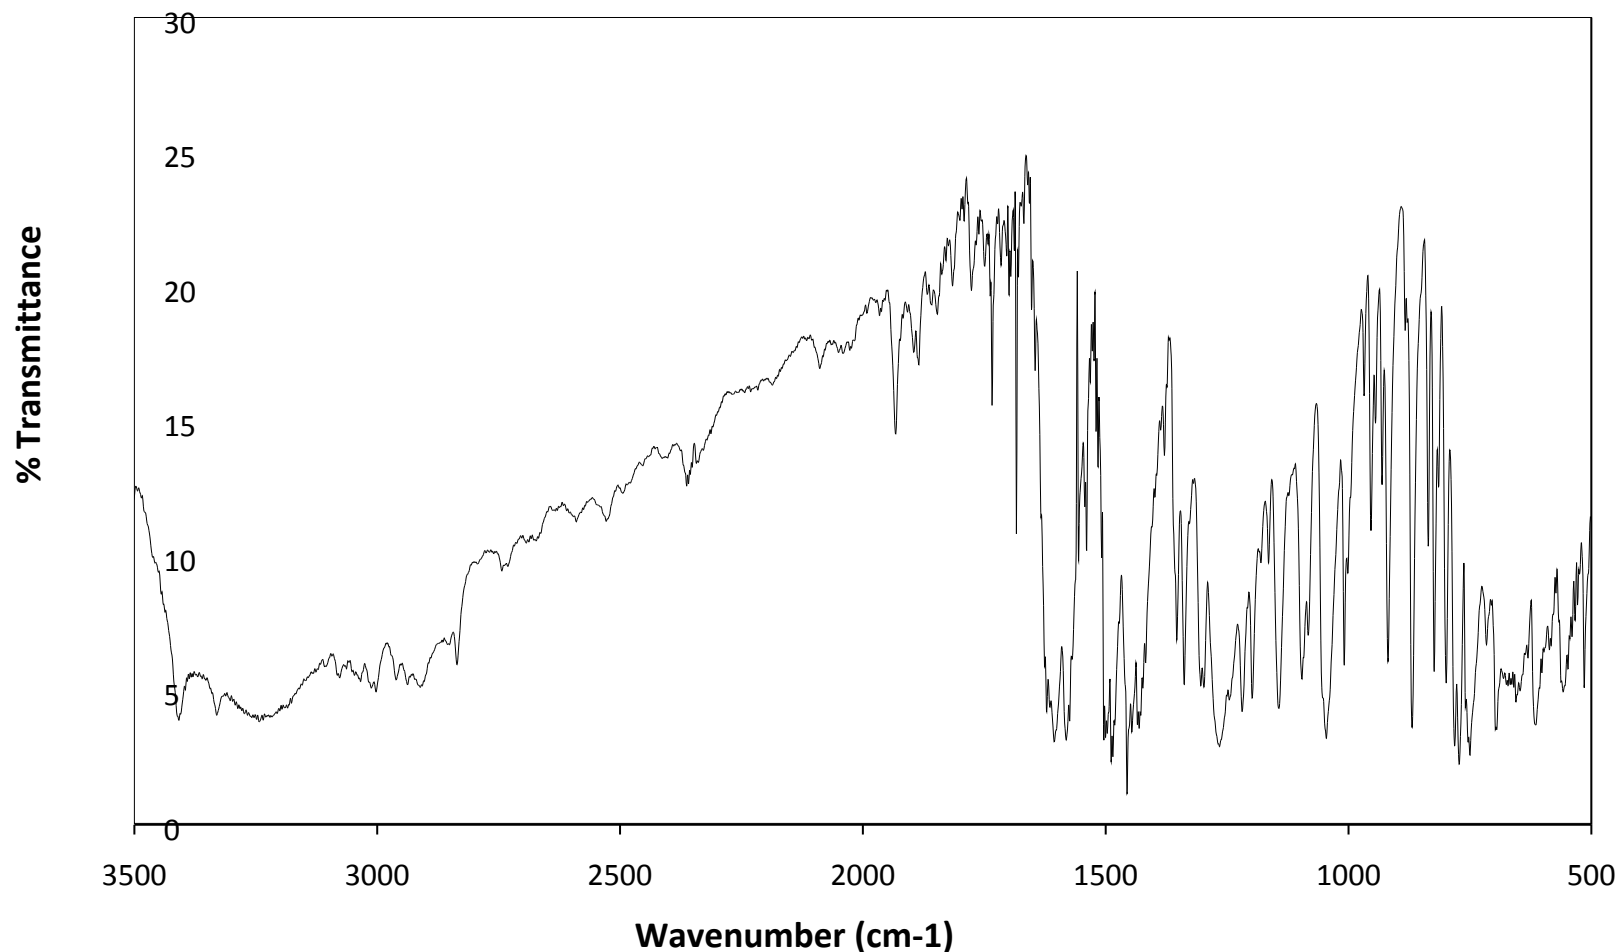

IR (KBr, cm<sup>-1</sup>): 3408 (s), 3331 (s), 3242 (br, s), 3078 (s), 3034 (s), 3010 (s), 3003 (s), 2960 (s), 2939 (s), 2910 (s), 2850 (m), 2835 (m), 2744 (m), 2729 (m), 1932 (w), 1886 (w), 1884 (w), 1734 (w), 1683 (m), 1622 (s), 1604 (s), 1581 (s), 1573 (s), 1539 (m), 1500 (s), 1489 (s), 1456 (s), 1431 (s), 1379 (w), 1354 (m), 1338 (m), 1303 (m), 1265 (s), 1219 (m), 1197 (m), 1165 (m), 1143 (m), 1095 (m), 1082 (m), 1045 (s), 1008 (m), 968 (w), 952 (m), 931 (m), 918 (m), 869 (s), 835 (m), 823 (m), 798 (m), 781 (s), 772 (s), 750 (S), 715 (m), 694 (s), 655 (s), 615 (s).

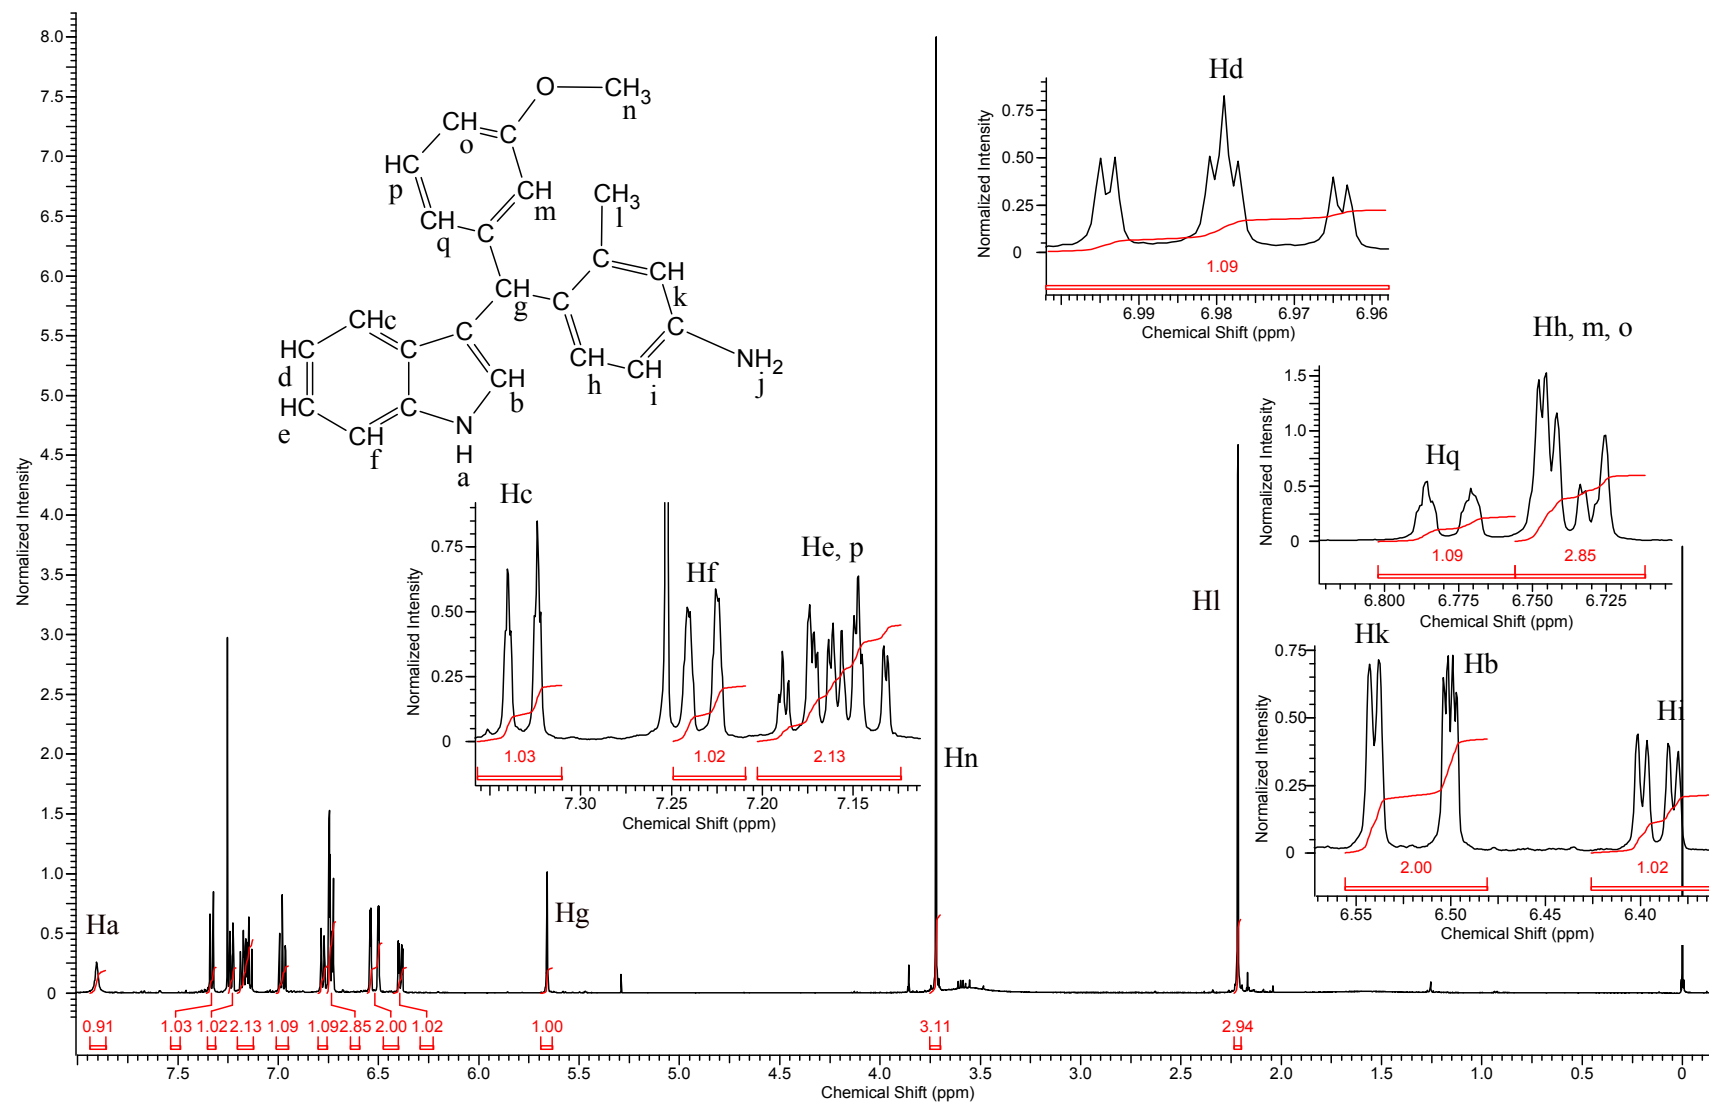

<sup>1</sup>H NMR (500MHz, CDCl<sub>3</sub>) δ = 7.91 (br s, 1 H), 7.33 (d, *J* = 8.2 Hz, 1 H), 7.23 (d, *J* = 7.9 Hz, 1 H), 7.20 - 7.12 (m, 2 H), 6.98 (ddd, *J* = 0.9, 7.0, 8.2 Hz, 1 H), 6.78 (d, *J* = 7.3 Hz, 1 H), 6.76 - 6.71 (m, 3 H), 6.54 (d, *J* = 2.6 Hz, 1 H), 6.50 (dd, *J* = 1.1, 2.3 Hz, 1 H), 6.39 (dd, *J* = 2.6, 8.1 Hz, 1 H), 5.66 (s, 1 H), 3.72 (s, 3 H).

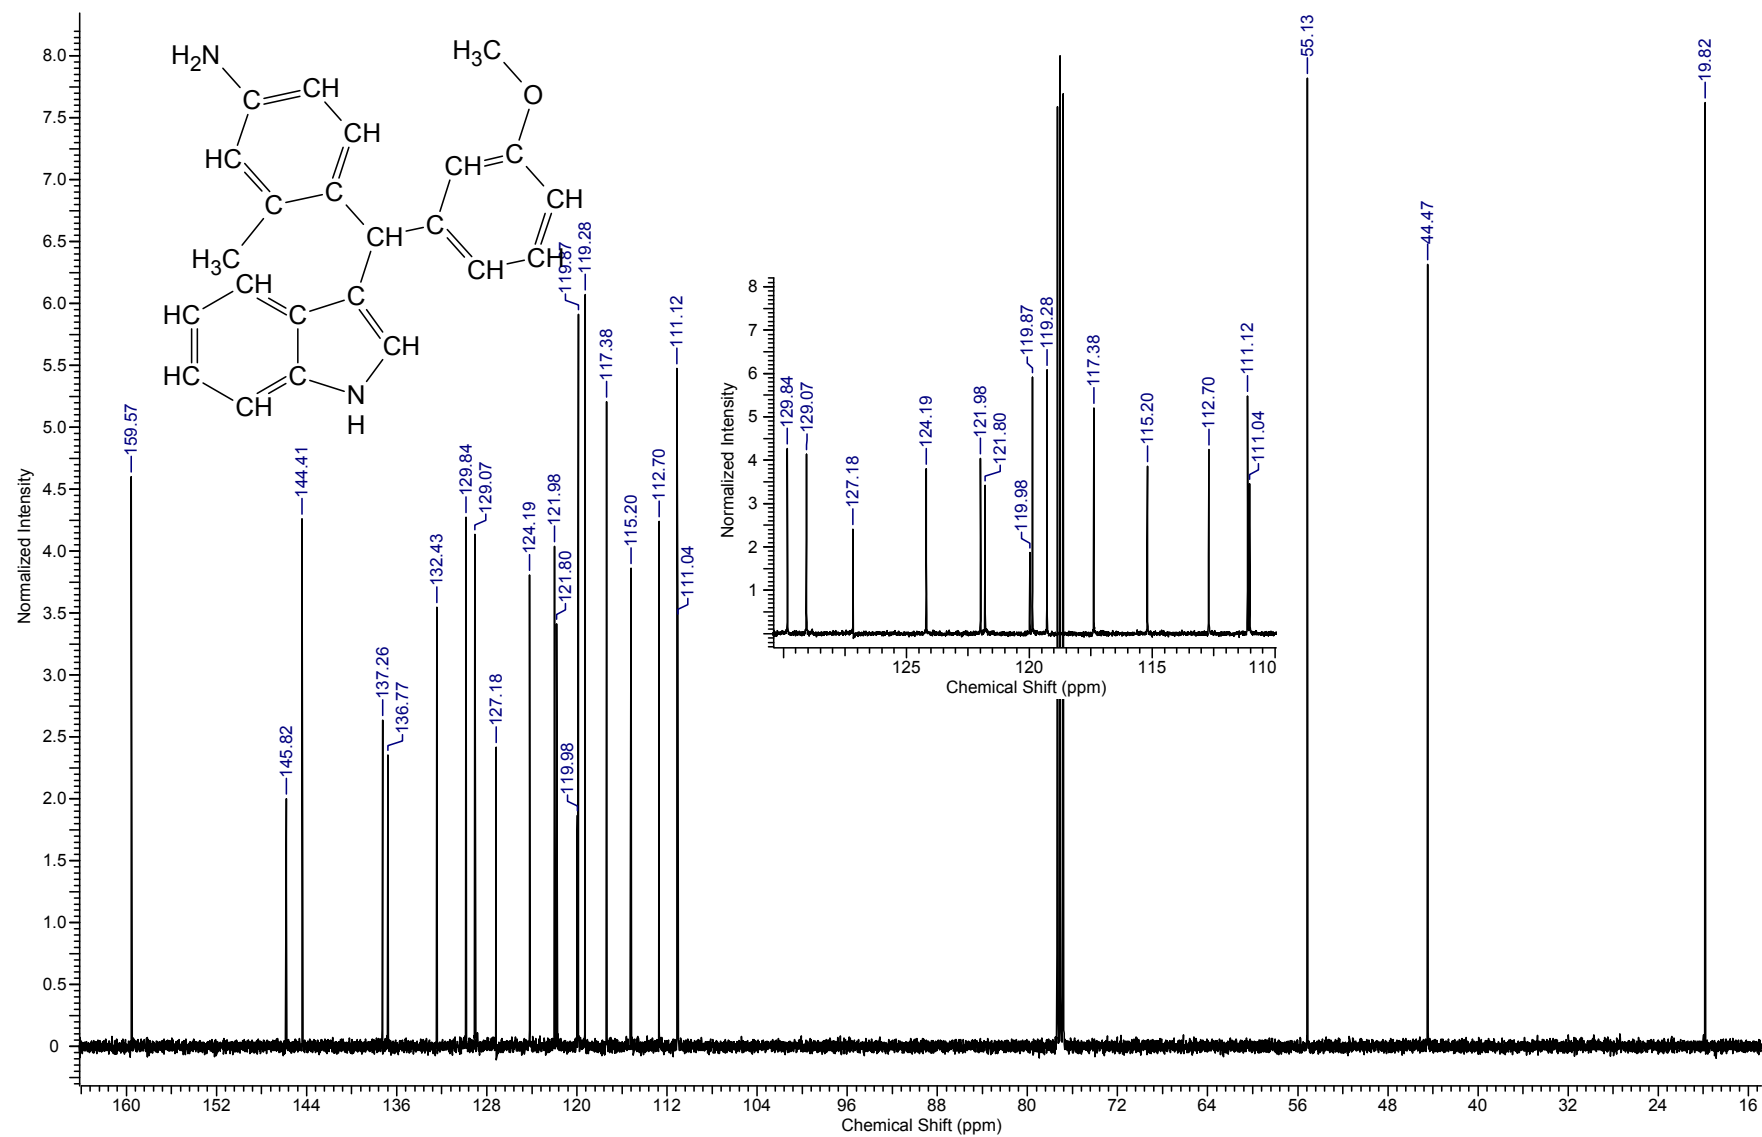

<sup>13</sup>C NMR (126 MHz, CDCl<sub>3</sub>) δ = 159.57, 145.82, 144.41, 137.26, 136.77, 132.43, 129.84, 129.07, 127.18, 124.19, 121.98, 121.80, 119.98, 119.87, 119.28, 117.38, 115.20, 112.70, 111.12, 111.04, 55.13, 44.47, 19.82.



The mass spectrum of this compound was obtained using a direct probe. The following peaks were obtained:

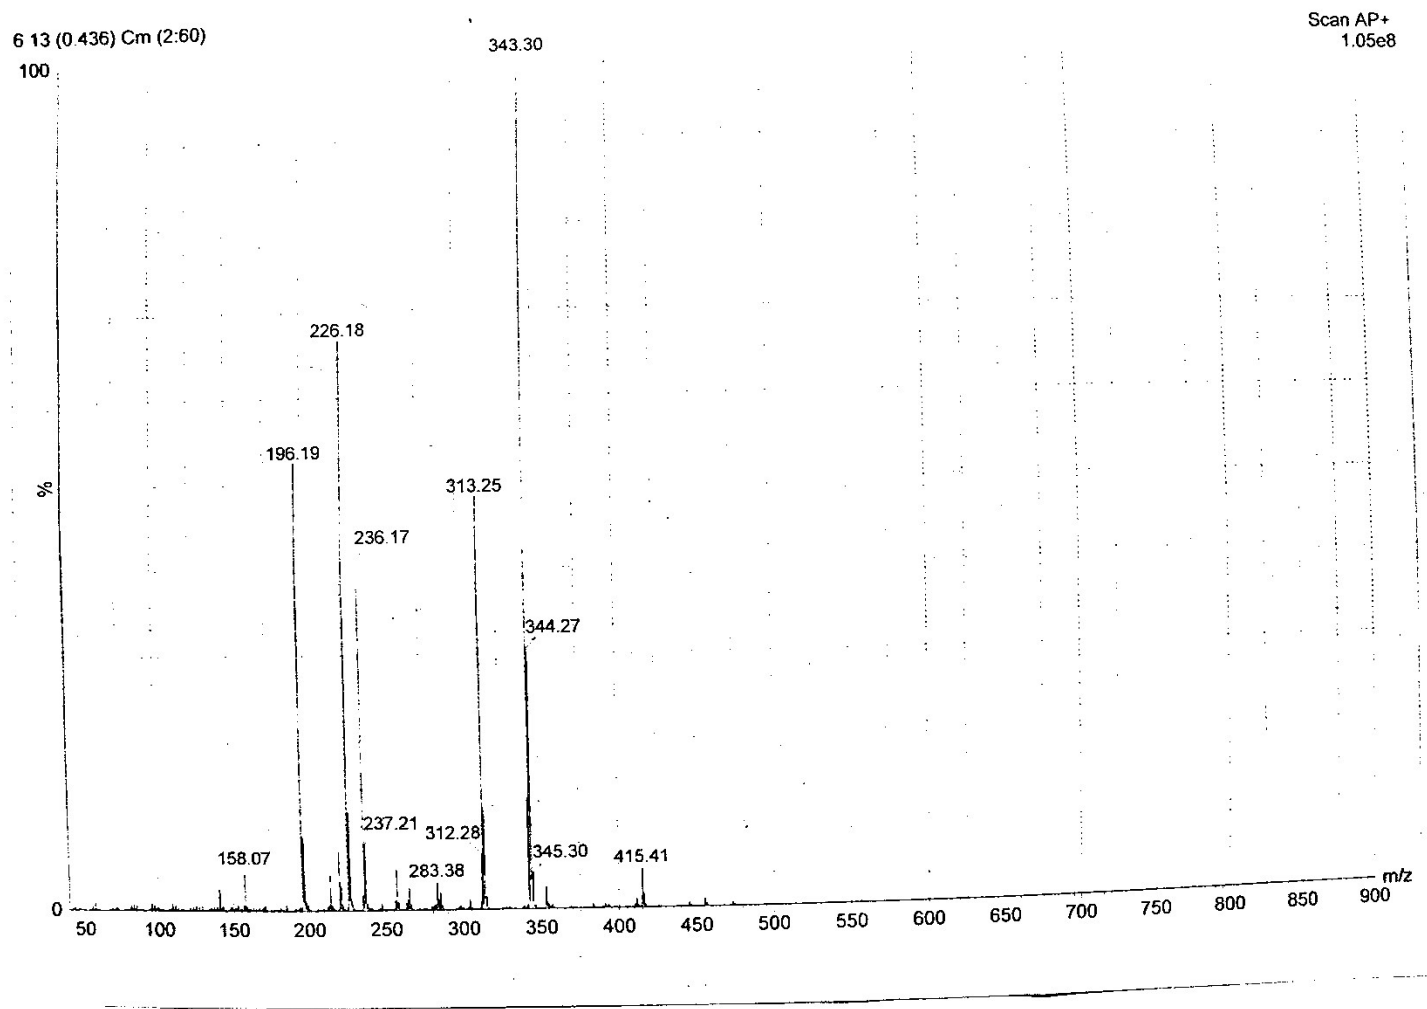

**3.12 4-bromobenzaldehyde (1n) + indole (2a) + 3-methylaniline (3g): (600) 4-[1*H*-indol-3-yl(4-bromophenyl)methyl]-3-methylaniline**

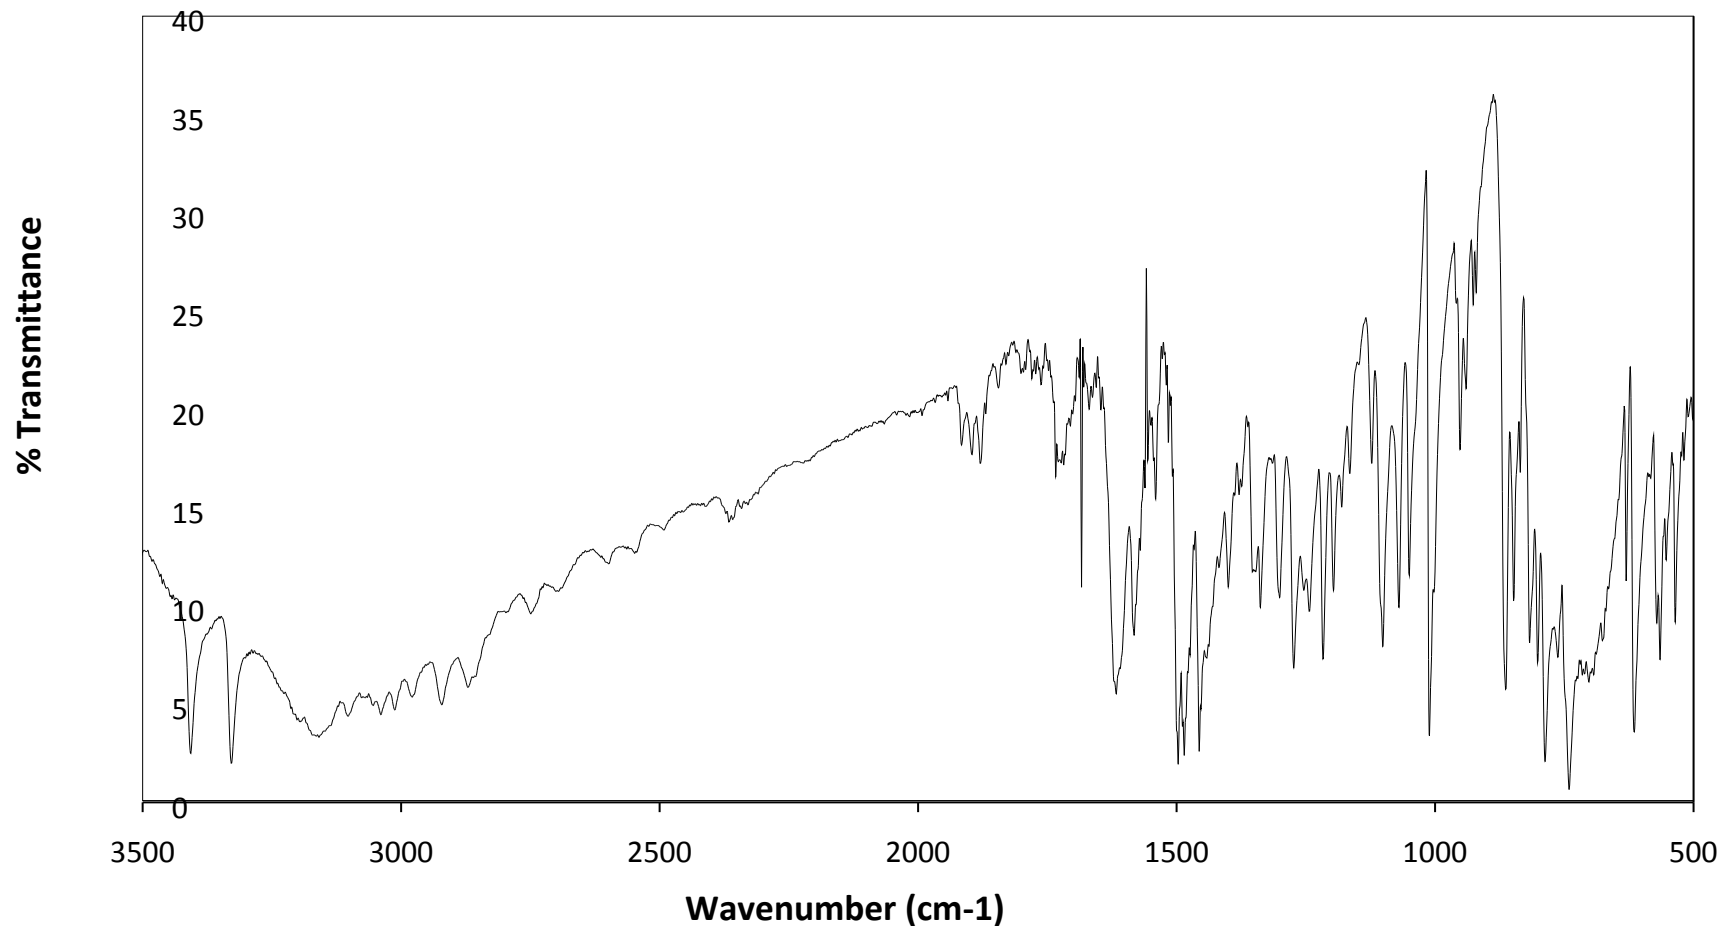

IR (KBr,  $\text{cm}^{-1}$ ): 3406 (s), 3329 (s), 3201 (s), 3159 (s), 3101 (s), 3053 (s), 3037 (s), 3012 (s), 2978 (s), 2922 (s), 2870 (s), 1734 (m), 1718 (m), 1683 (m), 1616 (s), 1581 (m), 1541 (m), 1496 (s), 1485 (s), 1456 (s), 1400 (m), 1346 (m), 1338 (m), 1300 (m), 1273 (m), 1244 (m), 1217 (m), 1195 (m), 1180 (m), 1165 (m), 1122 (m), 1101 (m), 1070 (m), 1049 (m), 1010 (s), 950 (m), 939 (w), 925 (w), 920 (w), 864 (s), 848 (m), 835 (m), 817 (m), 800 (m), 786 (s), 740 (s), 702 (m), 630 (m), 615 (s).

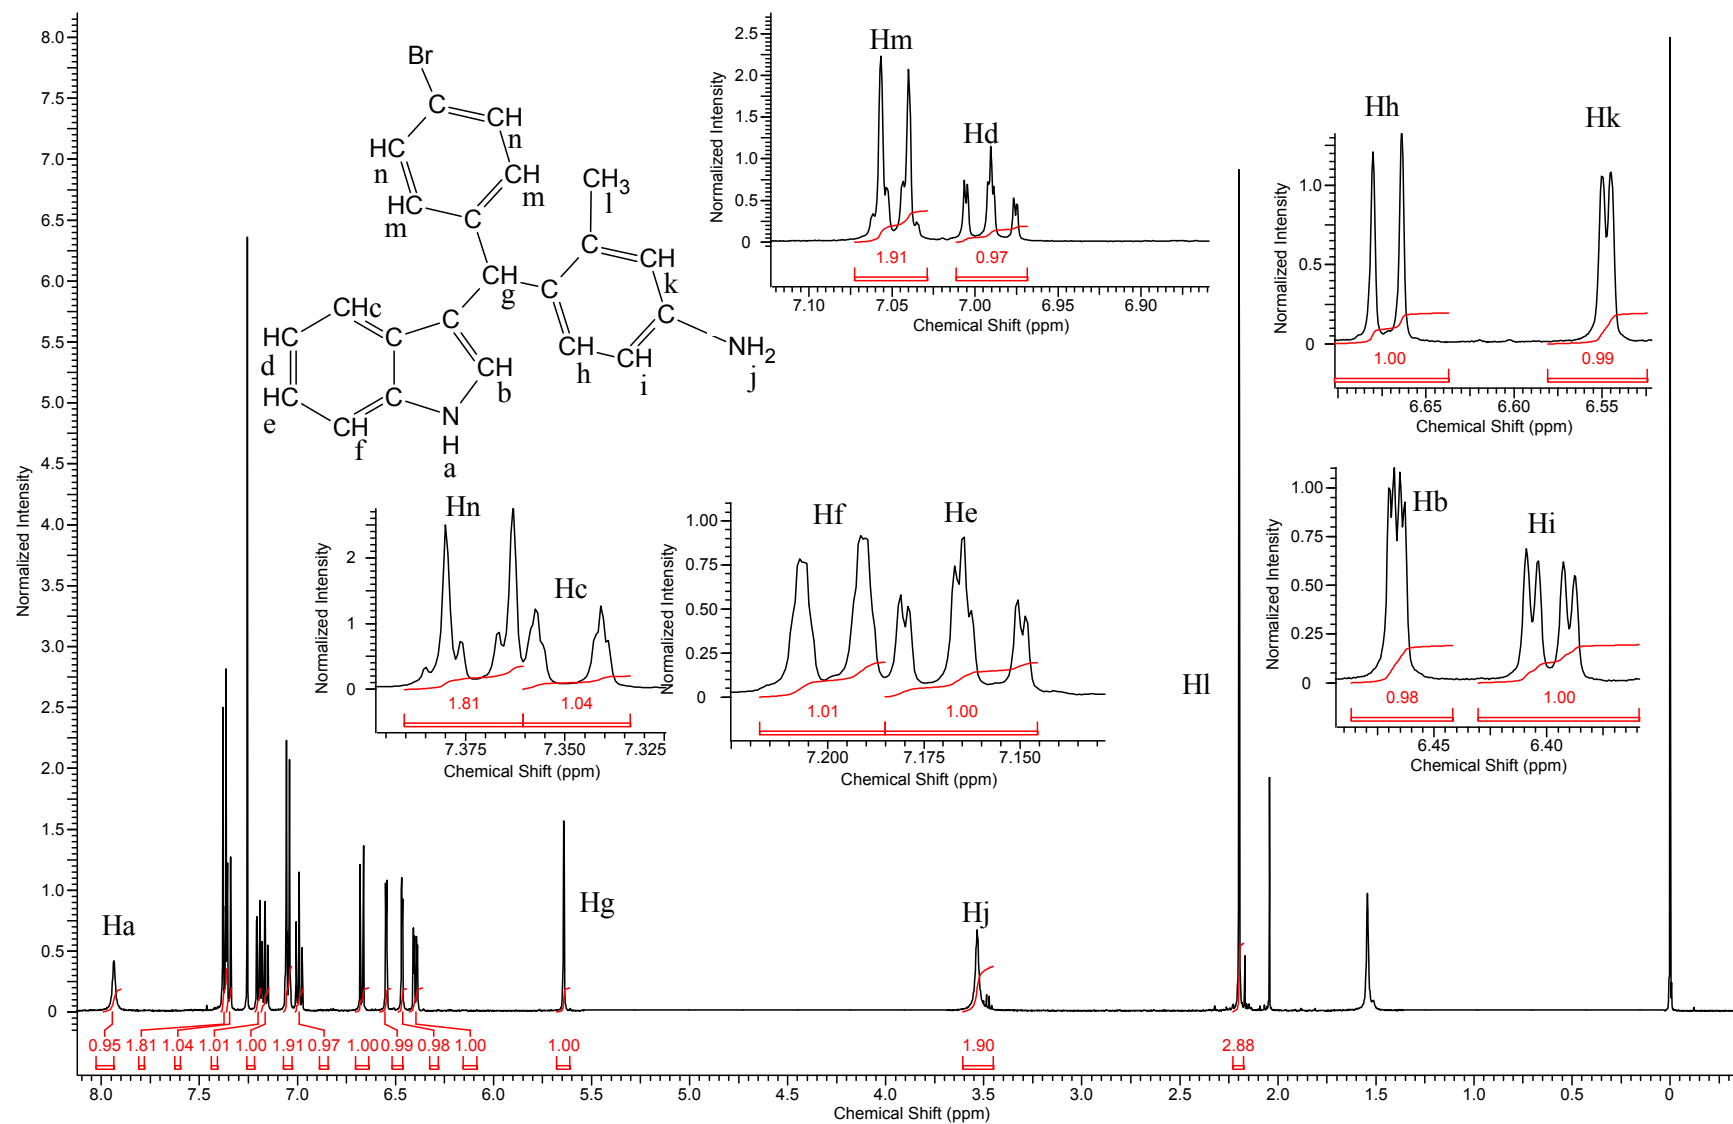

<sup>1</sup>H NMR (500 MHz, CDCl<sub>3</sub>) δ = 7.95 (br s, 1 H), 7.37 (d, *J* = 8.2 Hz, 2 H), 7.35 (d, *J* = 8.2 Hz, 1 H), 7.20 (d, *J* = 7.9 Hz, 1 H), 7.16 (ddd, *J* = 0.9, 7.1, 7.9 Hz, 1 H), 7.05 (d, *J* = 8.2 Hz, 2 H), 6.99 (ddd, *J* = 0.9, 7.0, 8.2 Hz, 1 H), 6.67 (d, *J* = 8.1 Hz, 1 H), 6.55 (d, *J* = 2.6 Hz, 1 H), 6.47 (dd, *J* = 1.2, 2.4 Hz, 1 H), 6.40 (dd, *J* = 2.6, 8.1 Hz, 1 H), 5.64 (s, 1 H), 3.53 (br s, 2 H), 2.20 (s, 3 H).

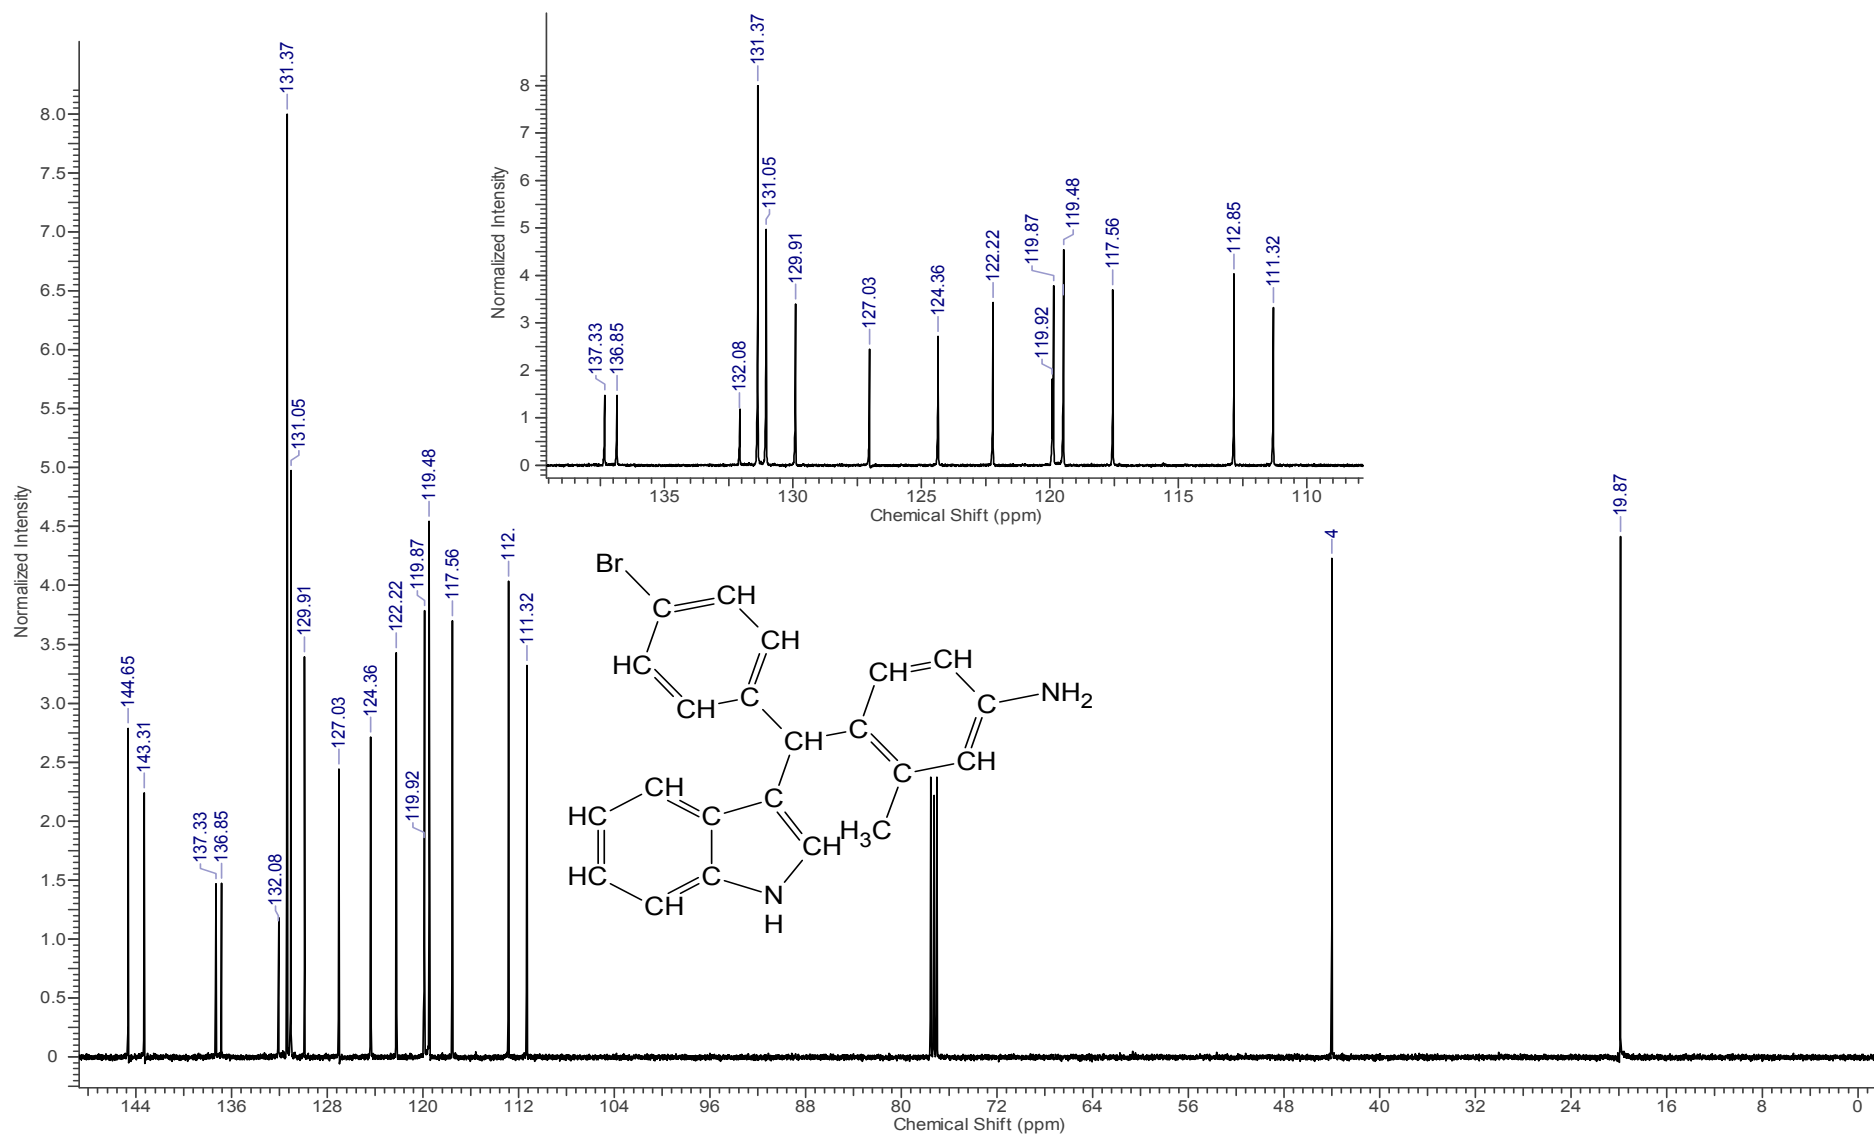

$^{13}\text{C}$  NMR (126 MHz,  $\text{CDCl}_3$ )  $\delta$  = 144.65, 143.31, 137.33, 136.85, 132.07, 131.37, 131.05, 129.91, 127.03, 124.36, 122.22, 119.92, 119.87, 119.50, 119.48, 117.56, 112.85, 111.32, 44.00, 19.87.

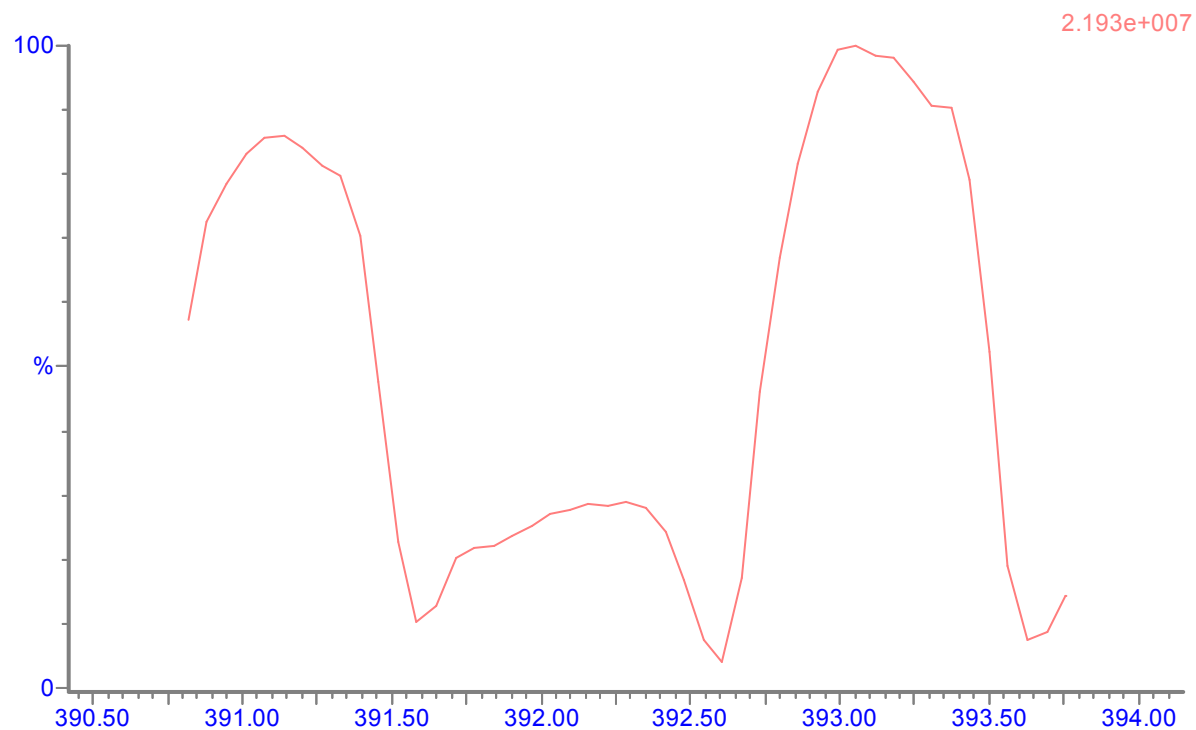

| Formula Mass | Daughter number | Parent m/z | Cone Voltage (V) | Daughters | Collision Energy (eV) | Ion Mode |
|--------------|-----------------|------------|------------------|-----------|-----------------------|----------|
| 391.31       | 1               | 393.10     | 42               | 286.08    | 26                    | ES+      |
|              | 2               | 393.10     | 42               | 276.07    | 26                    | ES+      |
|              | 3               | 393.10     | 42               | 194.13    | 42                    | ES+      |
|              | 4               | 393.10     | 42               | 204.20    | 56                    | ES+      |
|              | 5               | 393.10     | 42               | 180.08    | 40                    | ES+      |

**3.13 3,4-dichlorobenzaldehyde (1o) + indole (2a) + 3-methylaniline (3e): (6pp) 4-[1H-indol-3-yl(3,4-dichlorophenyl)methyl]-3-methylaniline**

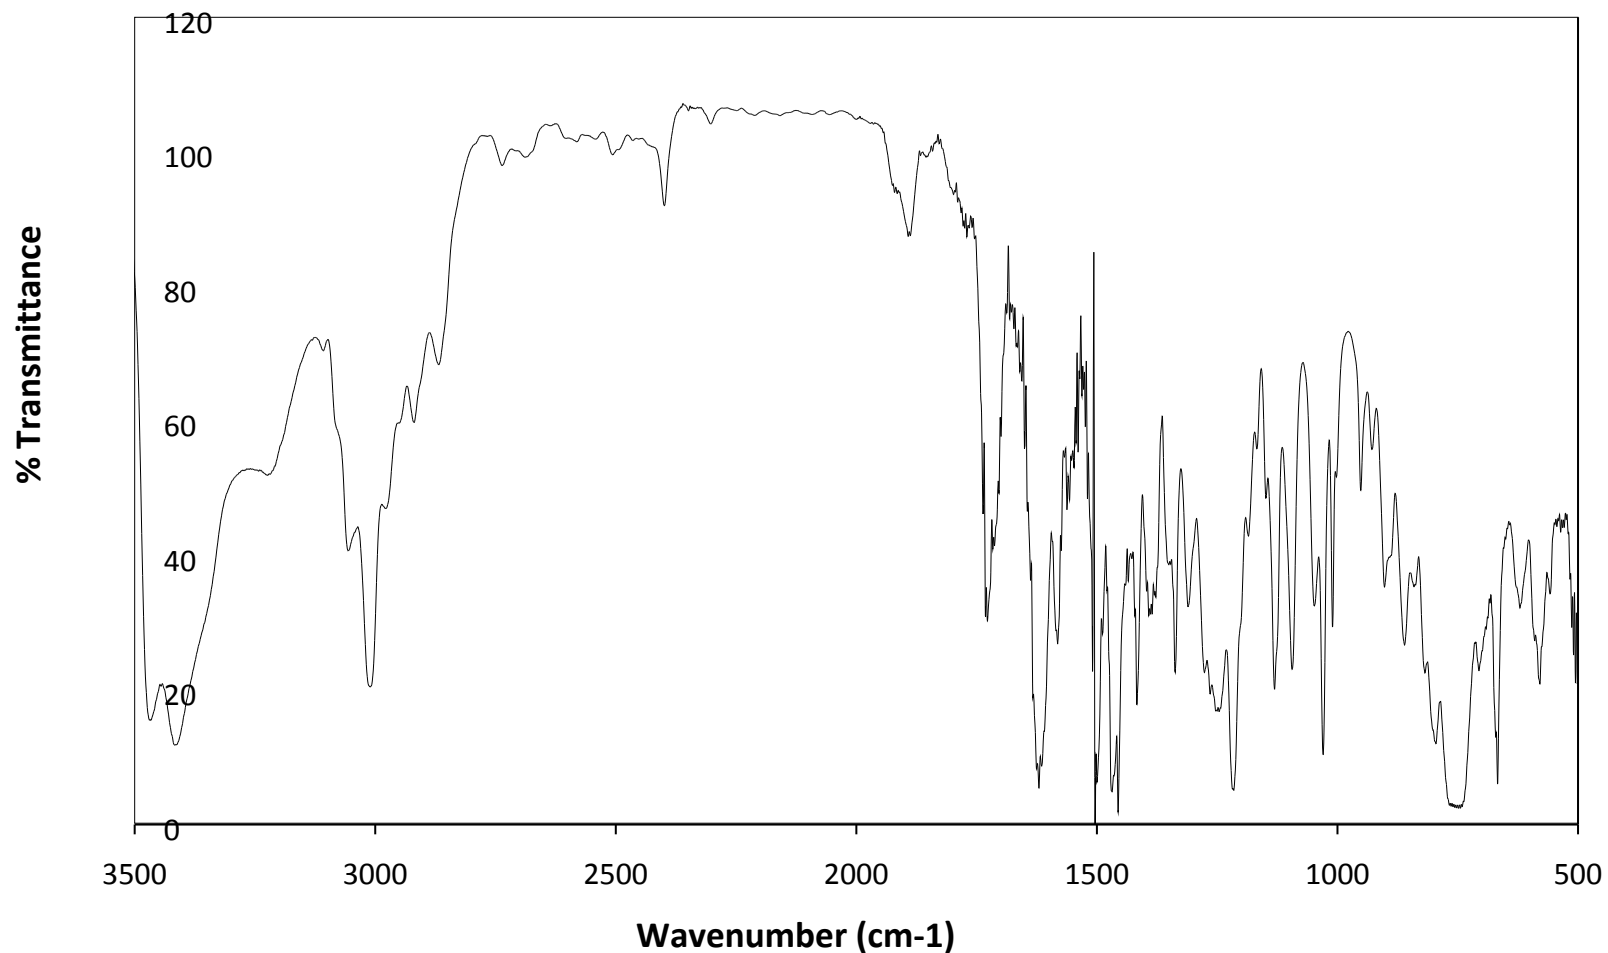

IR (KBr,  $\text{cm}^{-1}$ ): 3466 (s), 3410 (s), 3223 (m), 3057 (m), 3010 (s), 2976 (m), 2918 (m), 2868 (m), 1892 (w), 1728 (m), 1629 (s), 1582 (m), 1562 (m), 1504 (s), 1467 (s), 1456 (s), 1417 (m), 1392 (m), 1336 (m), 1309 (m), 1249 (m), 1215 (s), 1184 (m), 1130 (m), 1093 (m), 1049 (m), 1029 (m), 1010 (m), 950 (w), 927 (w), 902 (m), 860 (m), 794 (s), 748 (br, s), 705 (m), 667 (s), 621 (m).

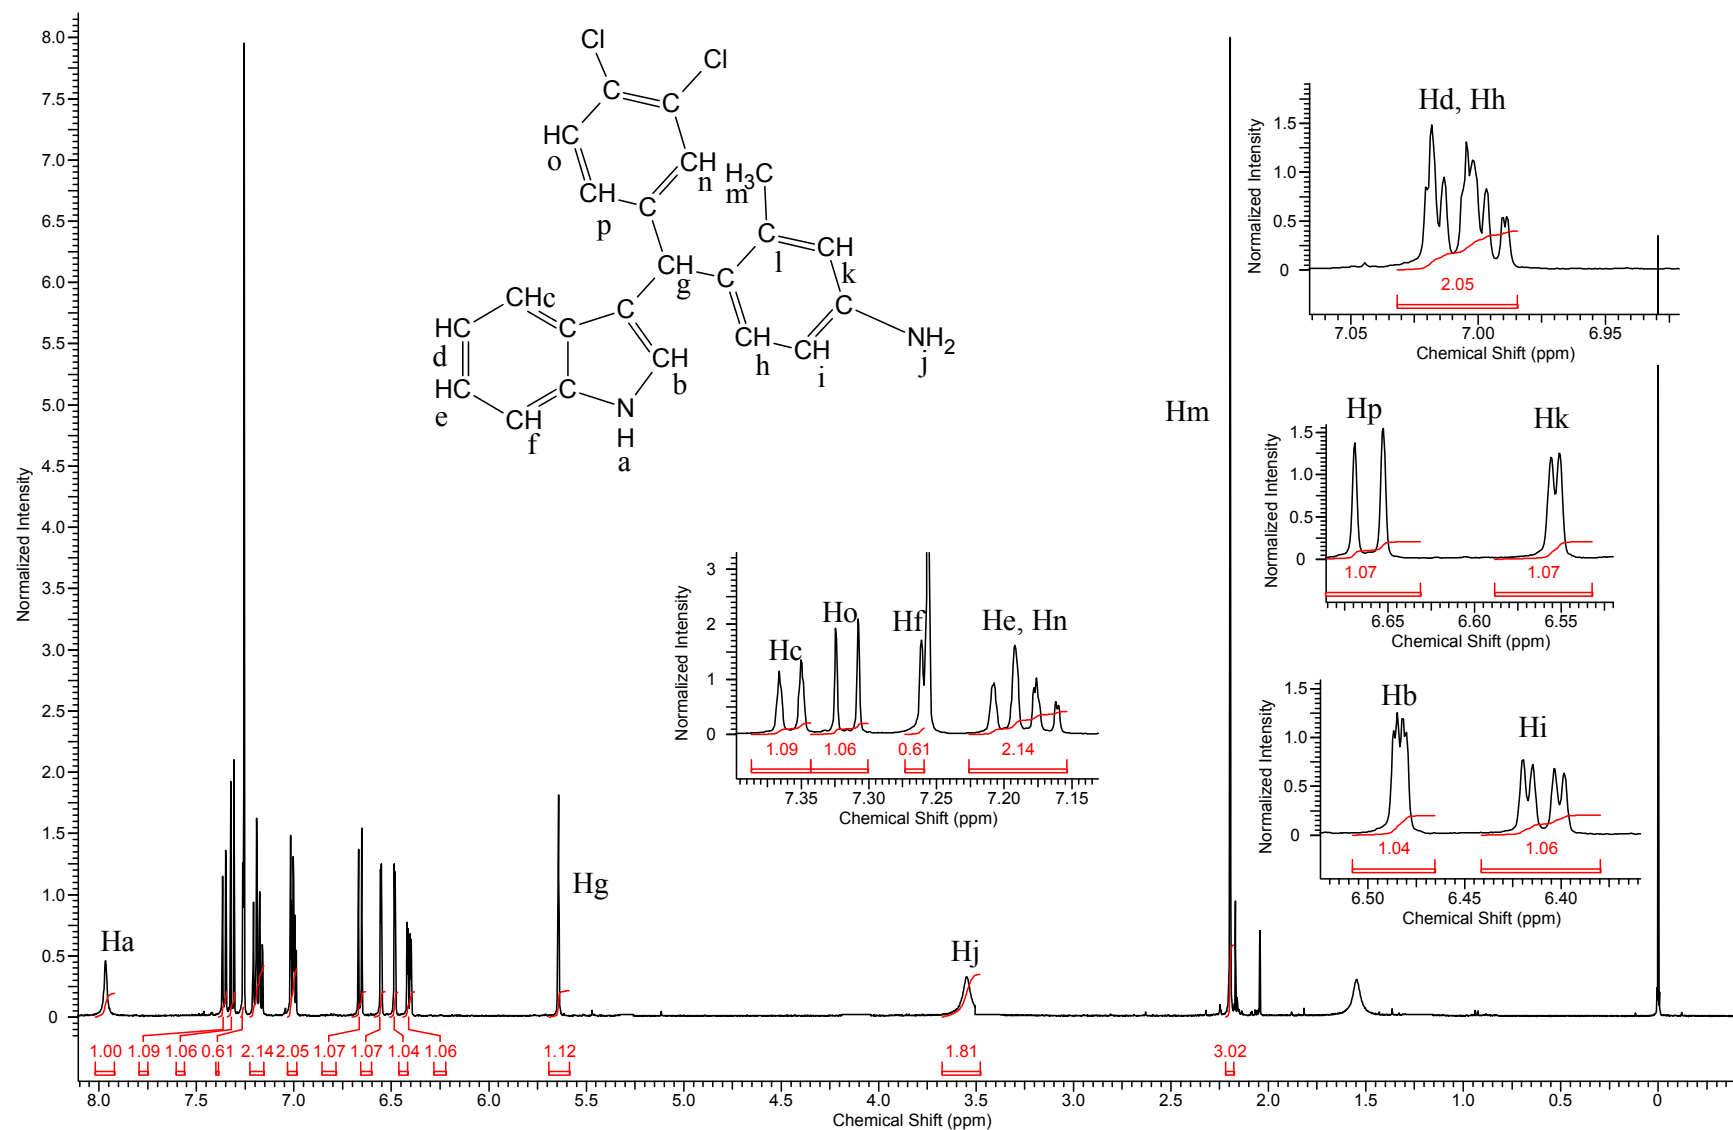

<sup>1</sup>H NMR (500MHz, CDCl<sub>3</sub>) δ = 7.97 (br s, 1 H), 7.36 (d, *J* = 8.2 Hz, 1 H), 7.32 (d, *J* = 8.2 Hz, 1 H), 7.26 (d, 1 H), 7.23 - 7.15 (m, 2 H), 7.03 – 6.98 (m, 2 H), 6.66 (d, *J* = 8.2 Hz, 1 H), 6.55 (d, *J* = 2.6 Hz, 1 H), 6.48 (dd, *J* = 0.9, 2.6 Hz, 1 H), 6.41 (dd, *J* = 2.6, 8.2 Hz, 1 H), 5.64 (s, 1 H), 3.55 (br s, 2 H), 2.20 (s, 3 H).

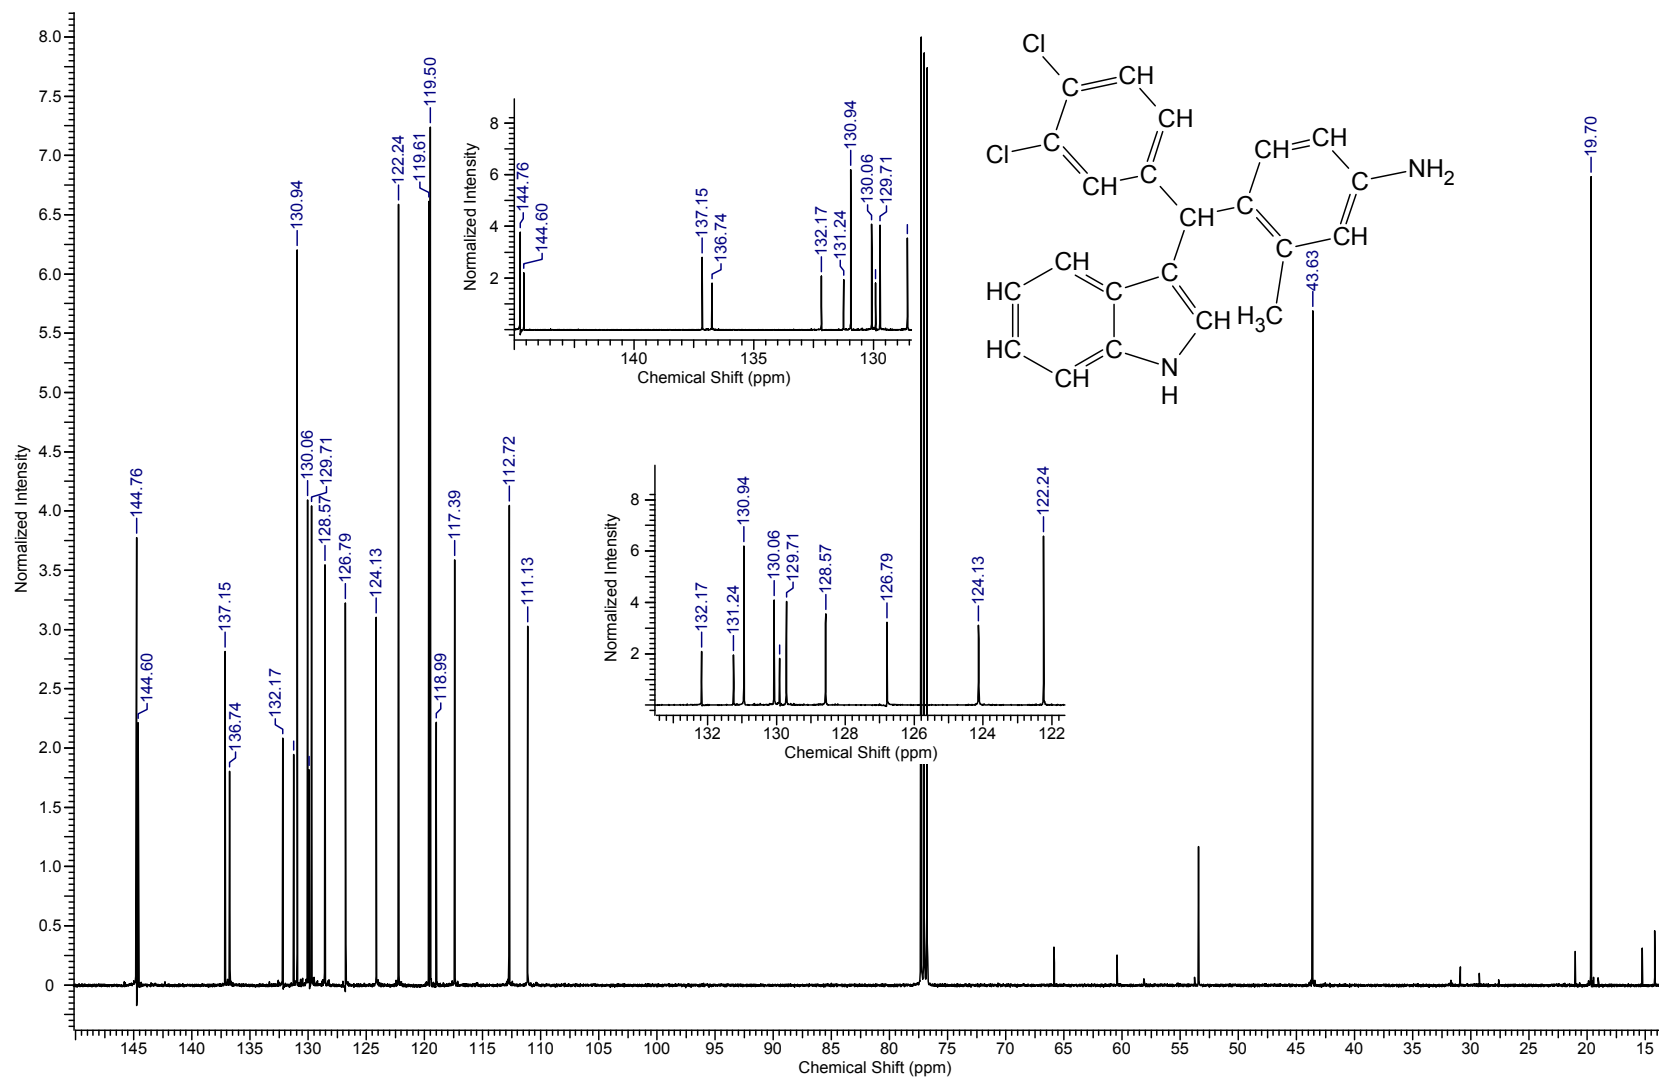

<sup>13</sup>C NMR (126 MHz, CDCl<sub>3</sub>) δ = 144.76, 144.60, 137.15, 136.74, 136.73, 132.17, 131.24, 130.94, 130.06, 129.91, 129.71, 128.57, 126.79, 124.13, 122.24, 119.61, 119.50, 118.99, 117.39, 112.72, 111.13, 43.63, 19.70.



The mass spectrum of this compound was obtained using a direct probe. The following peaks were obtained:

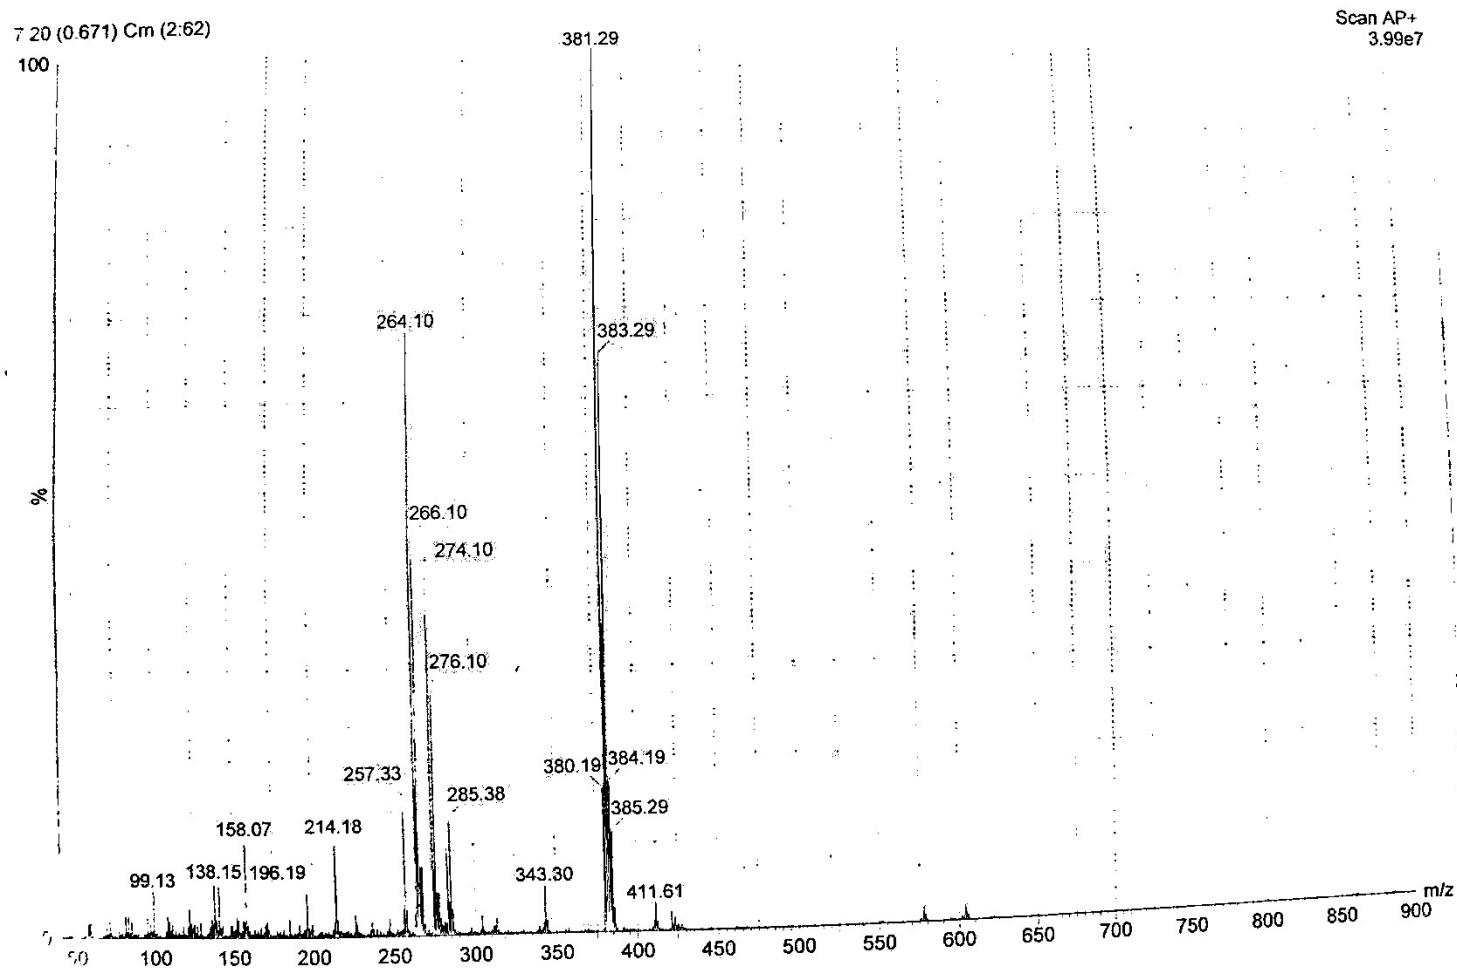

### 3.14 Benzaldehyde (1a) + indole (2a) + 2-methylaniline (3h): (6qq) 4-[1*H*-indol-3-yl(phenyl)methyl]-2-methylaniline

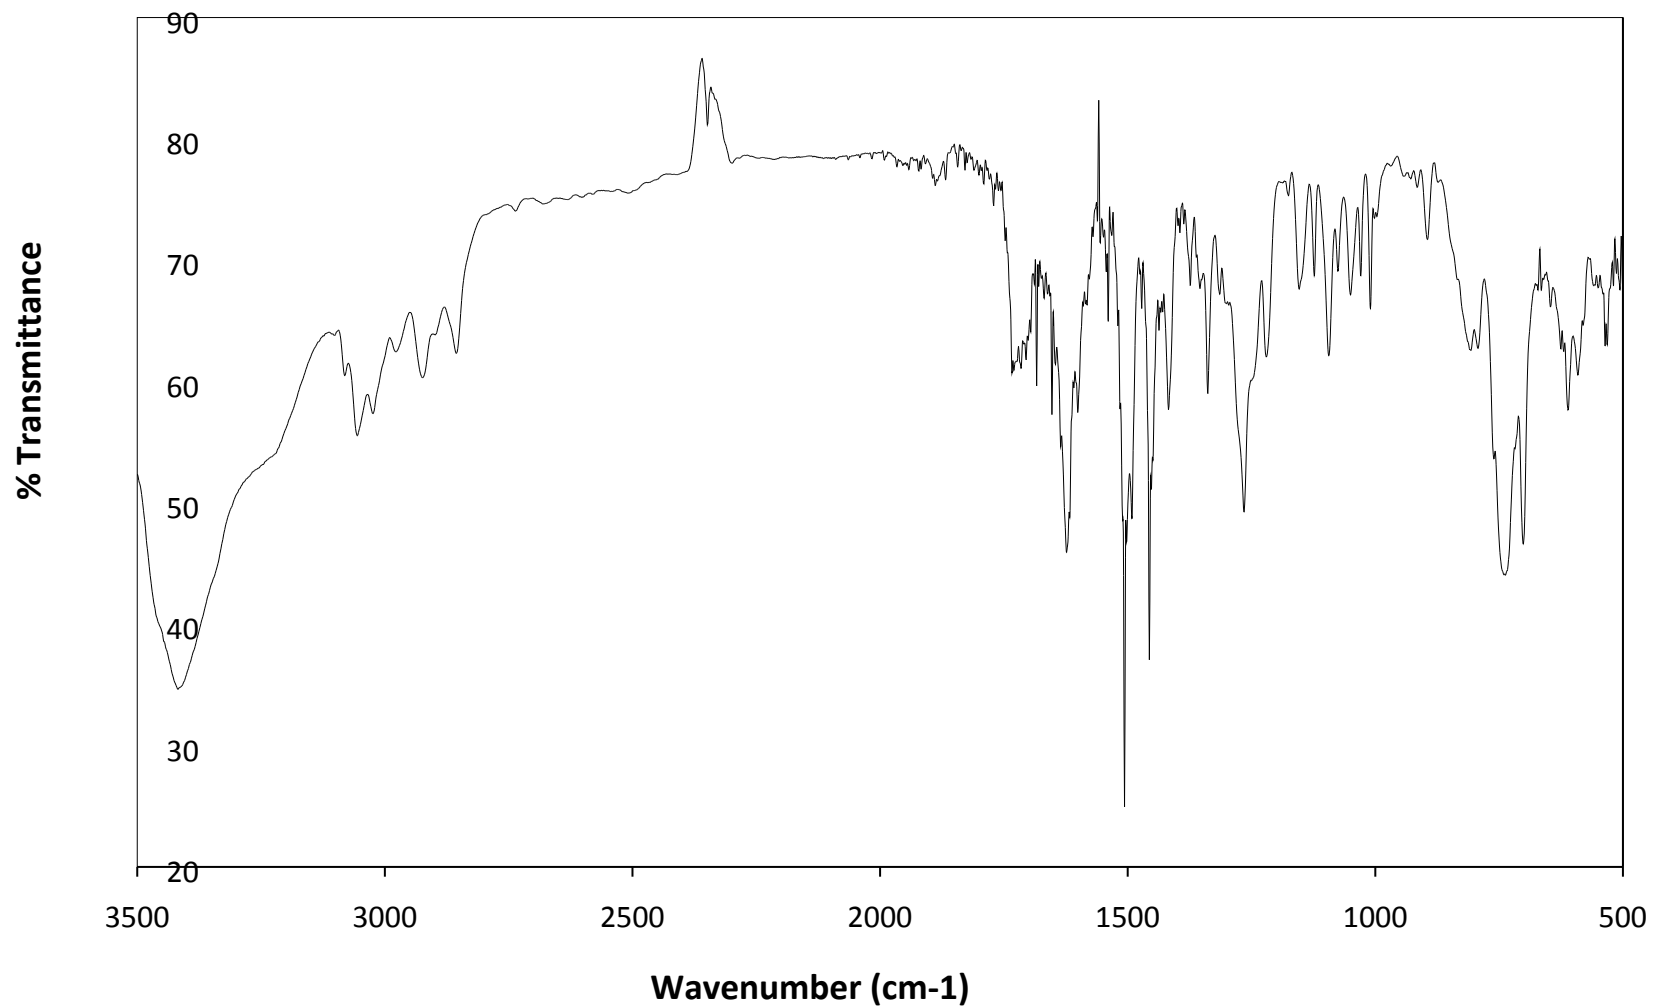

IR (KBr, cm<sup>-1</sup>): 3417 (br, s), 3219 (m), 3080 (m), 3055 (m), 3022 (m), 2980 (m), 2922 (m), 2899 (m), 2858 (m), 1734 (m), 1683 (m), 1652 (m), 1624 (m), 1612 (m), 1506 (s), 1490 (m), 1456 (s), 1417 (m), 1373 (w), 1354 (w), 1338 (m), 1265 (m), 1219 (m), 1153 (w), 1122 (w), 1093 (m), 1076 (w), 1049 (w), 1029 (w), 1010 (w), 894 (w), 808 (m), 792 (m), 740 (m), 702 (m), 611 (m).

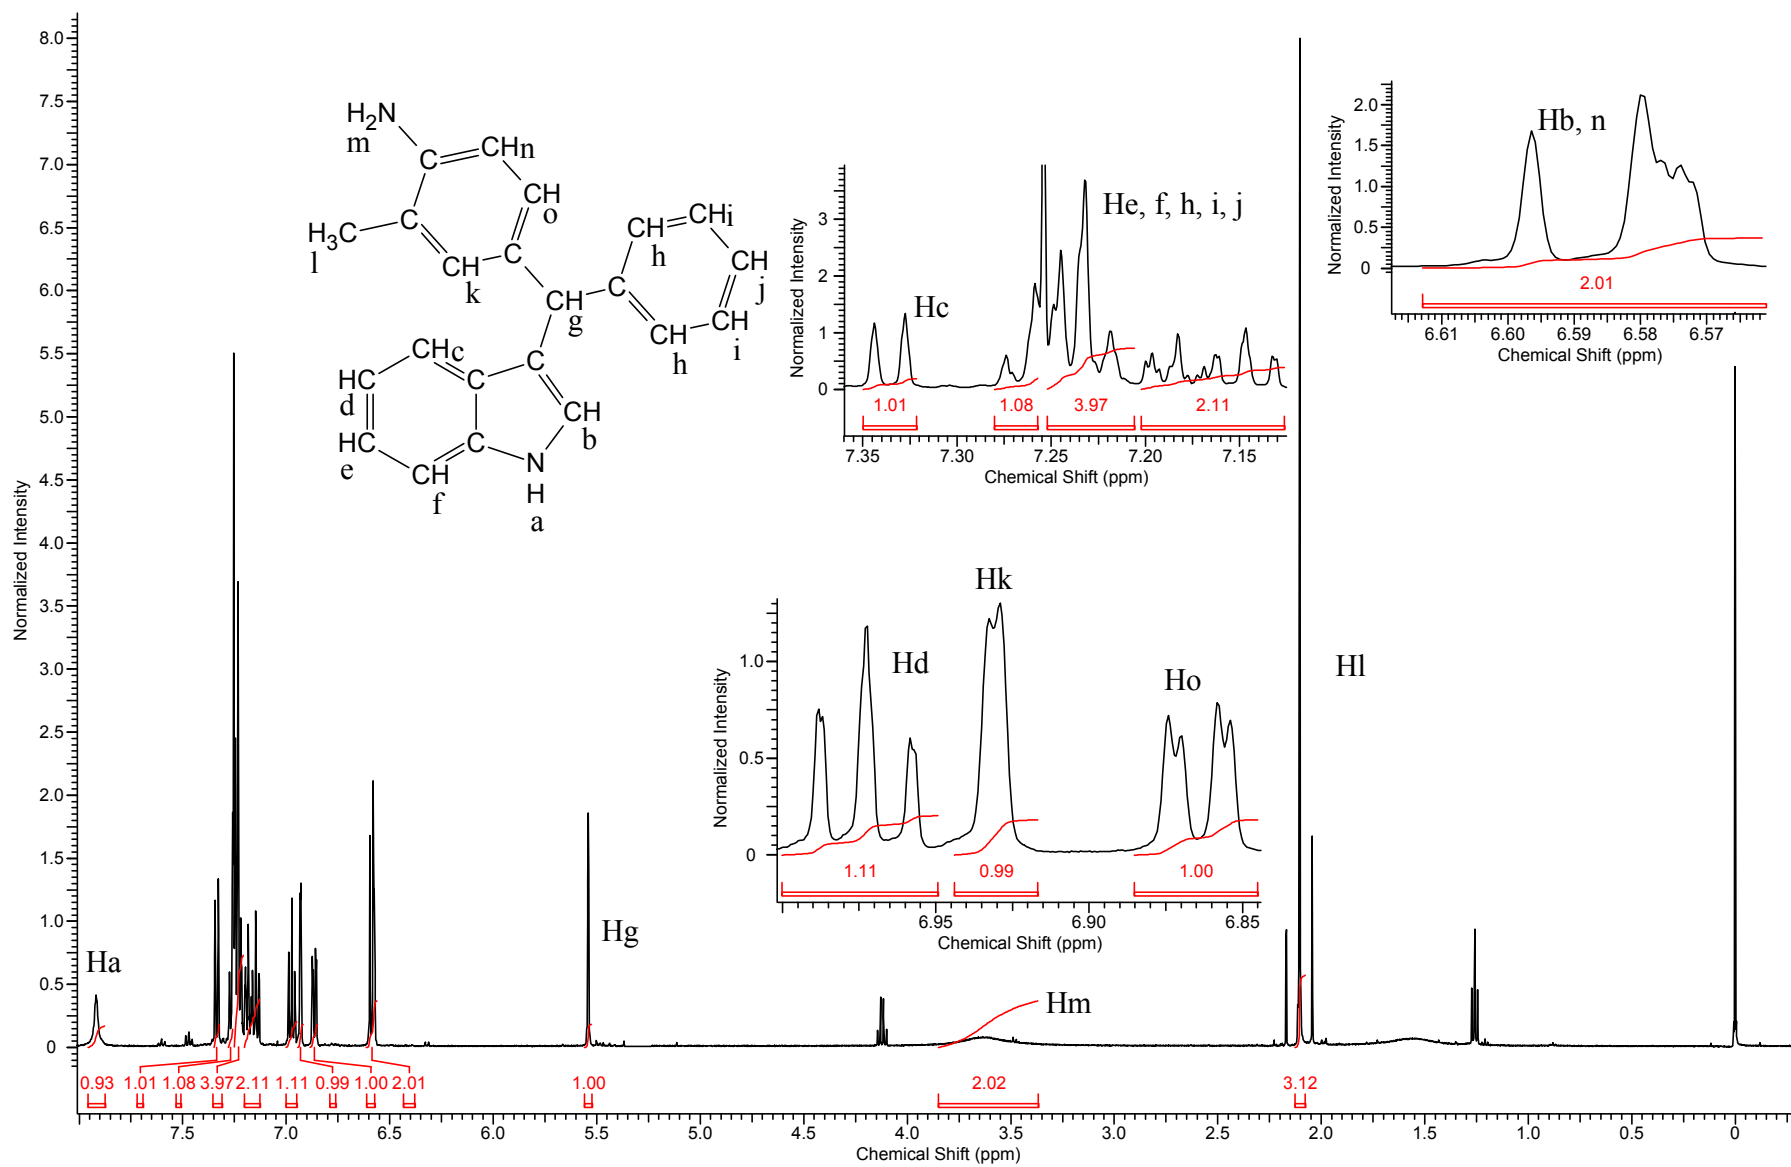

<sup>1</sup>H NMR (500MHz, CDCl<sub>3</sub>) δ = 7.92 (br s, 1 H), 7.34 (d, *J* = 8.2 Hz, 1 H), 7.28 - 7.26 (m, 1 H), 7.25 - 7.21 (m, 4 H), 7.21 - 7.13 (m, 2 H), 6.97 (t, *J* = 7.6 Hz, 1 H), 6.93 (d, *J* = 1.8 Hz, H), 6.86 (dd, *J* = 2.1, 7.9 Hz, 1 H), 6.61 - 6.56 (m, 2 H), 5.54 (s, 1 H), 2.10 (s, 3 H).

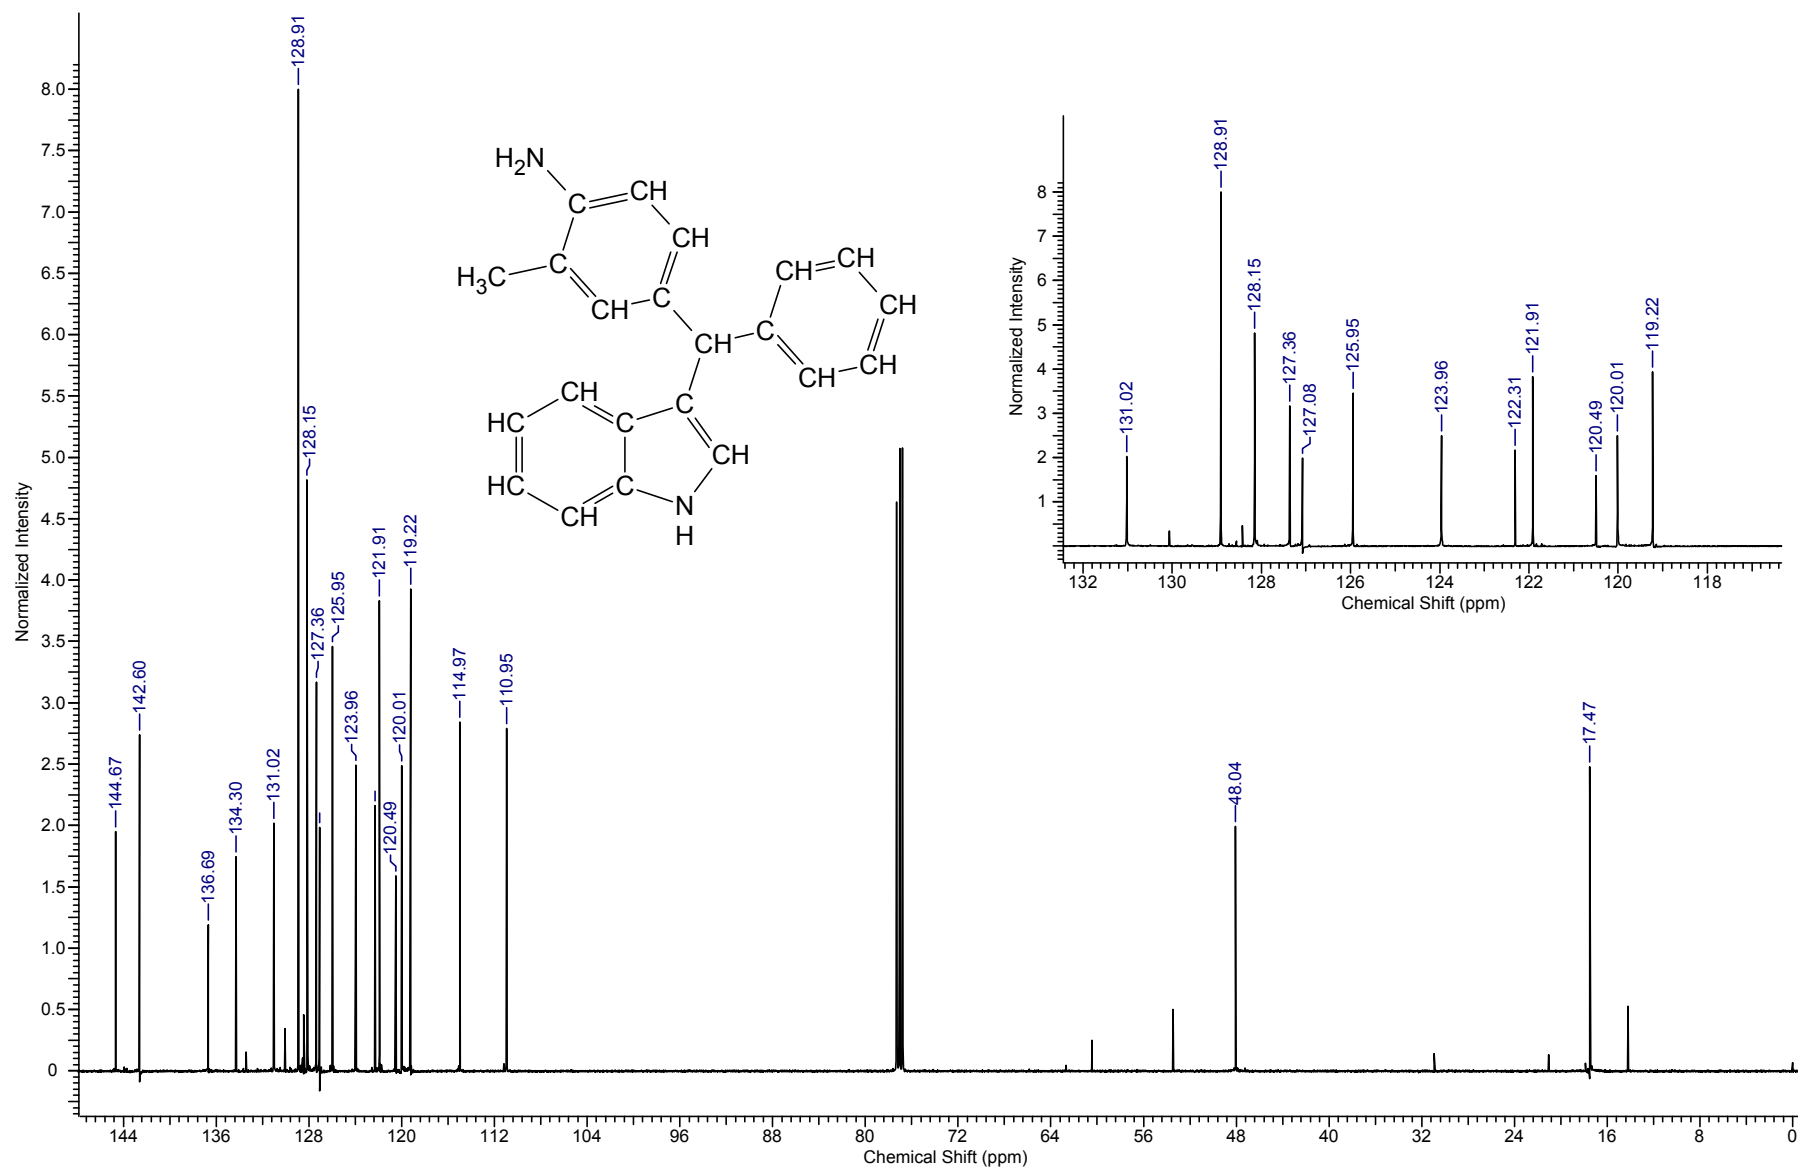

<sup>13</sup>C NMR (126 MHz, CDCl<sub>3</sub>) δ = 144.67, 142.60, 136.69, 134.30, 131.02, 128.91, 128.15, 127.36, 127.08, 125.95, 123.96, 122.31, 121.91, 120.49, 120.01, 119.22, 114.97, 110.95, 48.04, 17.47.

The mass spectrum of the following compound was obtained using a direct probe. The following peaks were obtained:

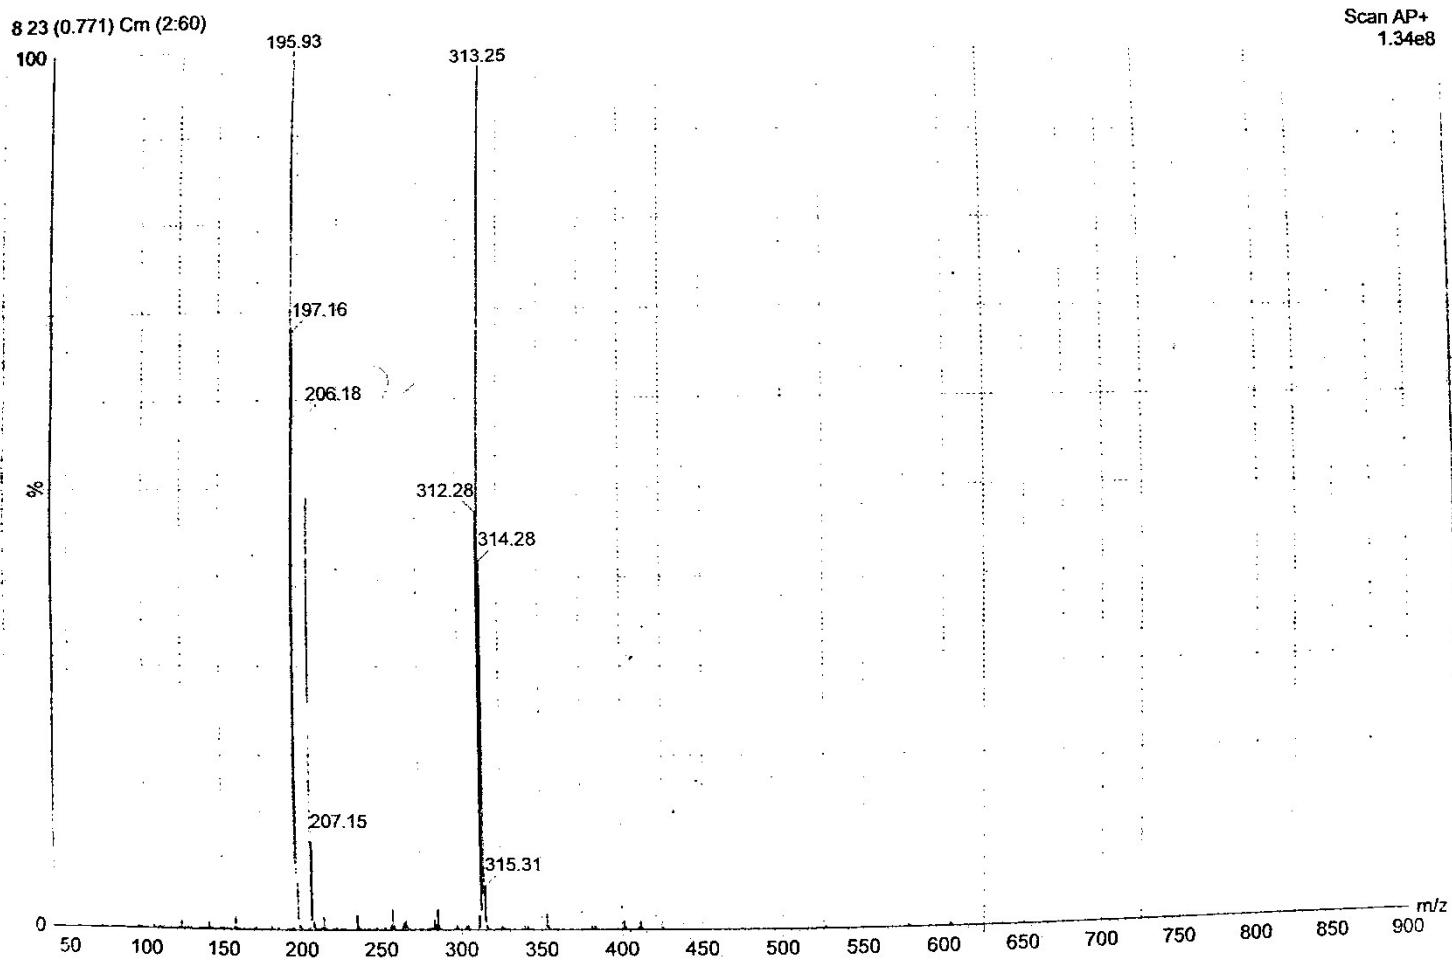

**3.15 3-methoxybenzaldehyde (1h) + indole (2a) + 2-methylaniline (3h): (6rr) 4-[1*H*-indol-3-yl(3-methoxyphenyl)methyl]-2-methylaniline**

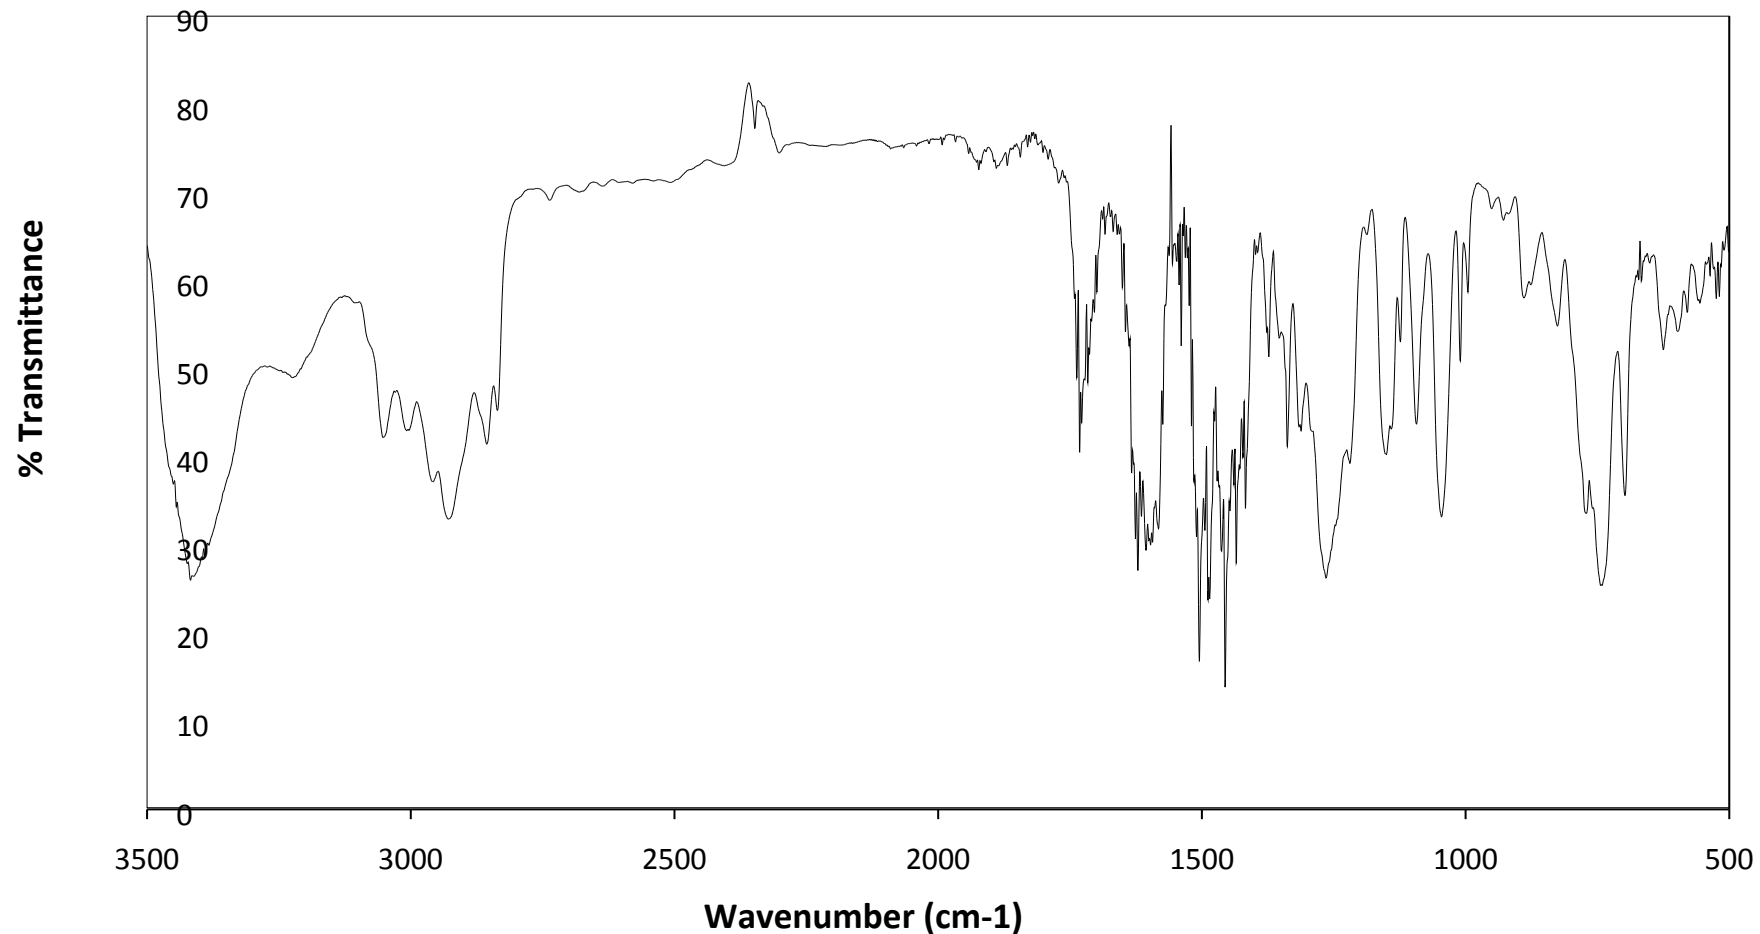

IR (KBr, cm<sup>-1</sup>): 3417 (s), 3223 (m), 3049 (m), 3003 (m), 2956 (s), 2926 (s), 2856 (m), 2837 (m), 1732 (m), 1622 (s), 1606 (s), 1597 (s), 1581 (s), 1539 (w), 1504 (s), 1485 (s), 1456 (s), 1435 (s), 1417 (s), 1373 (w), 1338 (m), 1311 (m), 1265 (s), 1219 (m), 1149 (m), 1139 (m), 1122 (w), 1093 (m), 1047 (m), 1010 (w), 995 (w), 889 (w), 875 (w), 825 (w), 773 (m), 742 (s), 698 (m), 624 (w).

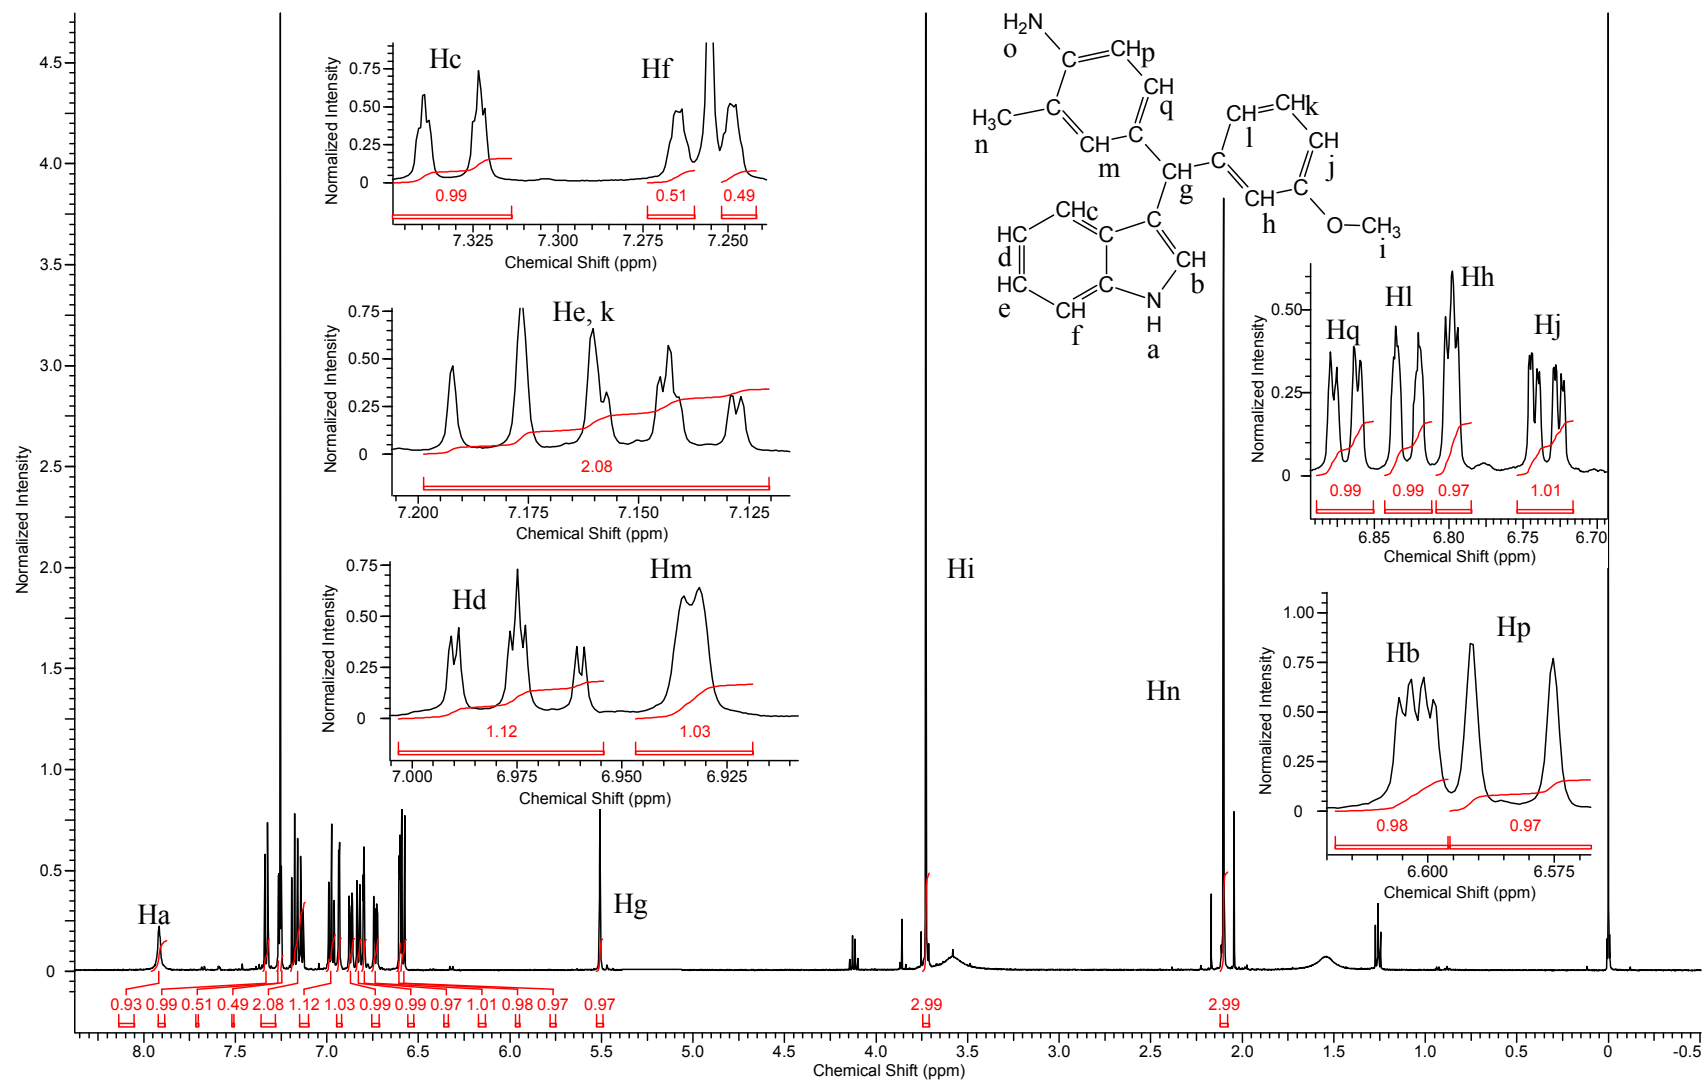

<sup>1</sup>H NMR (500 MHz, CDCl<sub>3</sub>) δ = 7.92 (br s, 1 H), 7.33 (d, *J* = 7.9 Hz, 1 H), 7.26 (d, *J* = 7.9 Hz, 1 H), 7.20 - 7.12 (m, 2 H), 6.97 (ddd, *J* = 0.9, 7.0, 7.9 Hz, 1 H), 6.93 (d, *J* = 2.0 Hz, 1 H), 6.87 (dd, *J* = 2.0, 8.2 Hz, 1 H), 6.83 (d, *J* = 7.9 Hz, 1 H), 6.80 (t, *J* = 2.4 Hz, 1 H), 6.73 (ddd, *J* = 0.8, 2.6, 8.2 Hz, 1 H), 6.60 (dd, *J* = 1.1, 2.3 Hz, 1 H), 6.58 (d, *J* = 8.2 Hz, 1 H), 5.51 (s, 1 H), 3.73 (s, 3 H), 2.10 (s, 3 H).

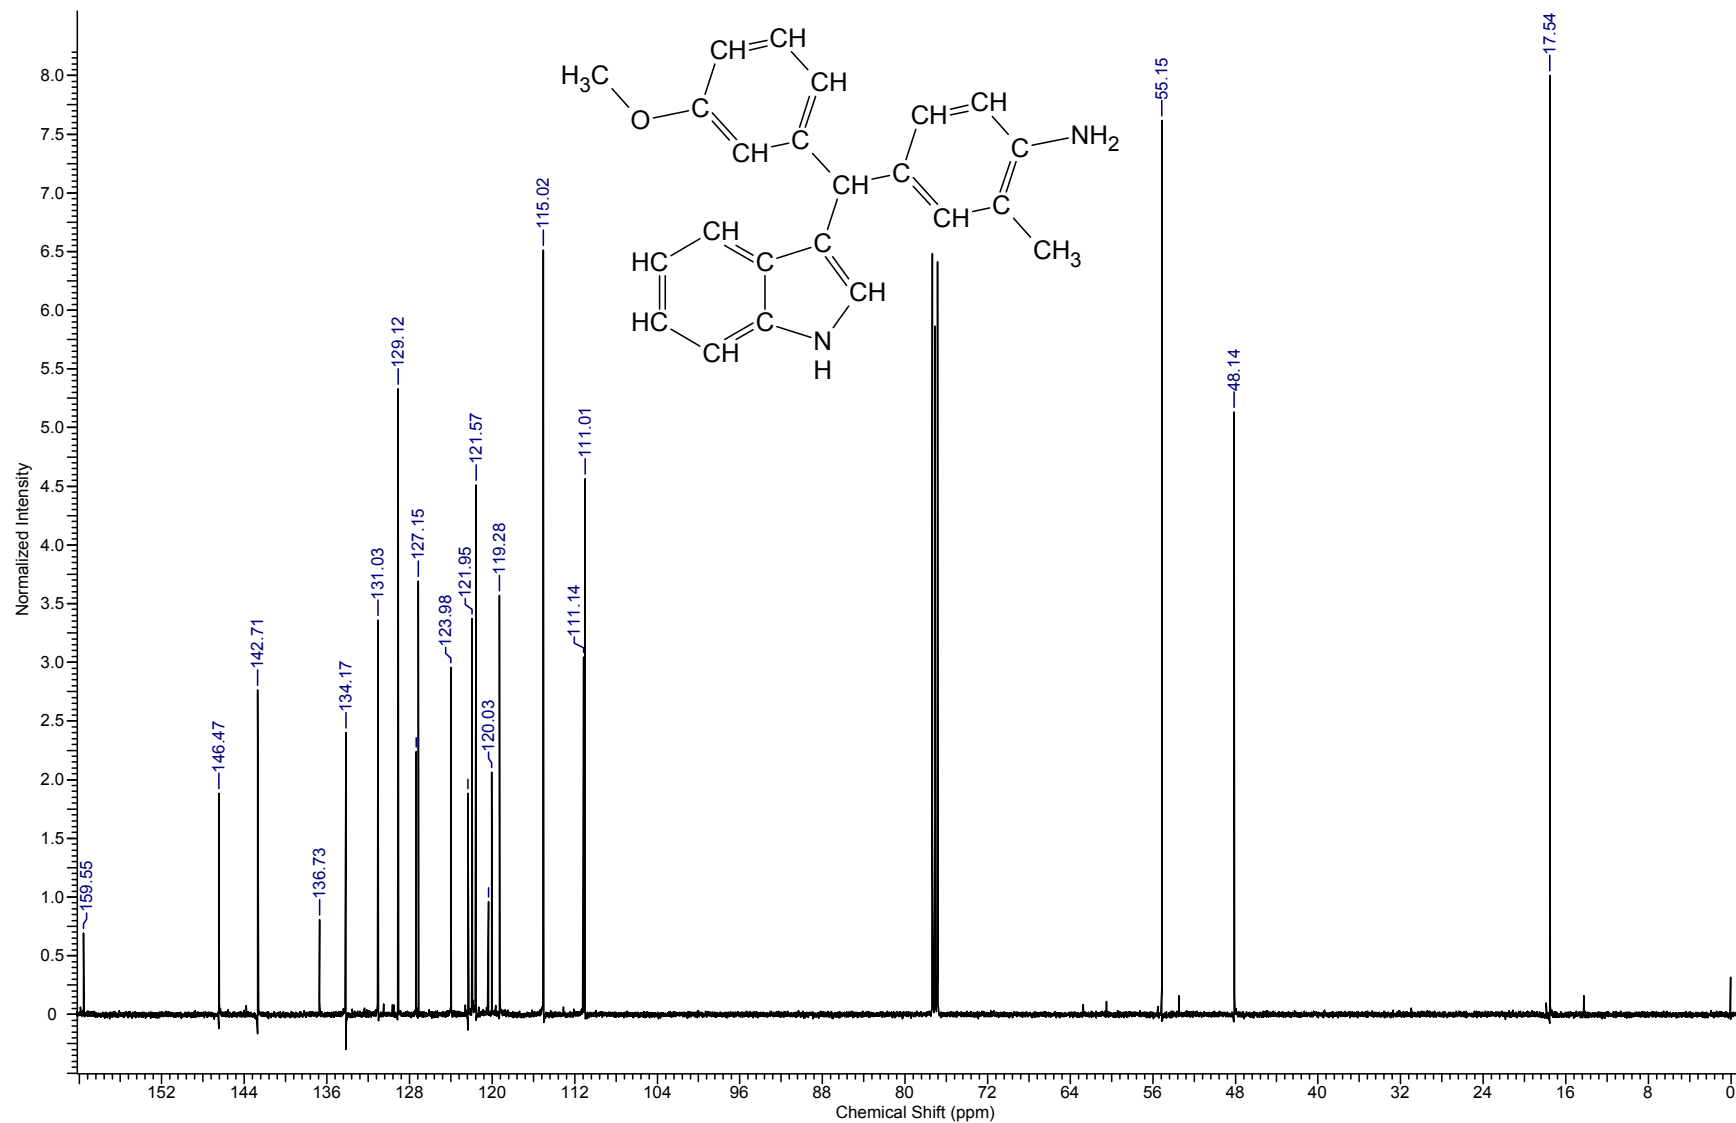

<sup>13</sup>C NMR (126 MHz, CDCl<sub>3</sub>) δ = 159.55, 146.47, 142.71, 136.73, 134.17, 131.03, 129.12, 127.37, 127.15, 123.98, 123.97, 122.34, 121.95, 121.57, 120.36, 120.03, 119.28, 115.02, 111.14, 111.01, 55.15, 48.14, 17.54.



The mass spectrum of this compound was obtained using a direct probe. The following peaks were obtained:

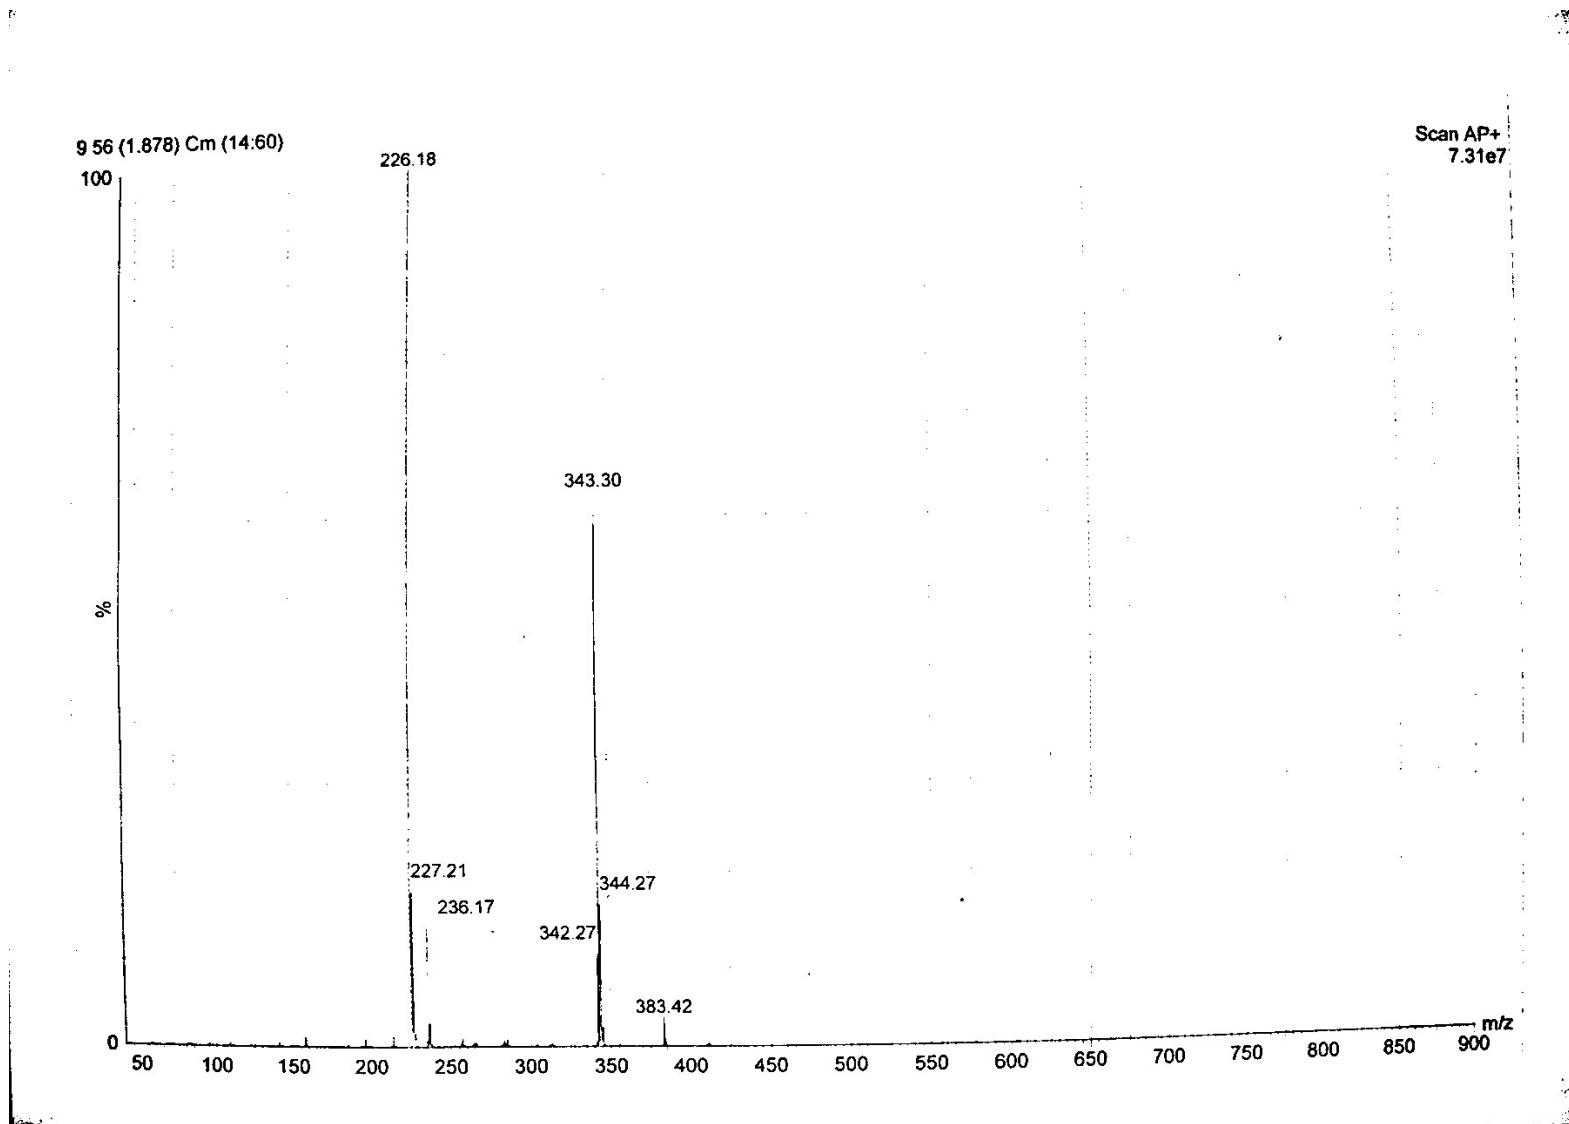

**3.16 3,4-dichlorobenzaldehyde (1o) + indole (2a) + 2-methylaniline (3h): (6ss) 4-[1*H*-indol-3-yl(3,4-dichlorophenyl)methyl]-2-methylaniline**

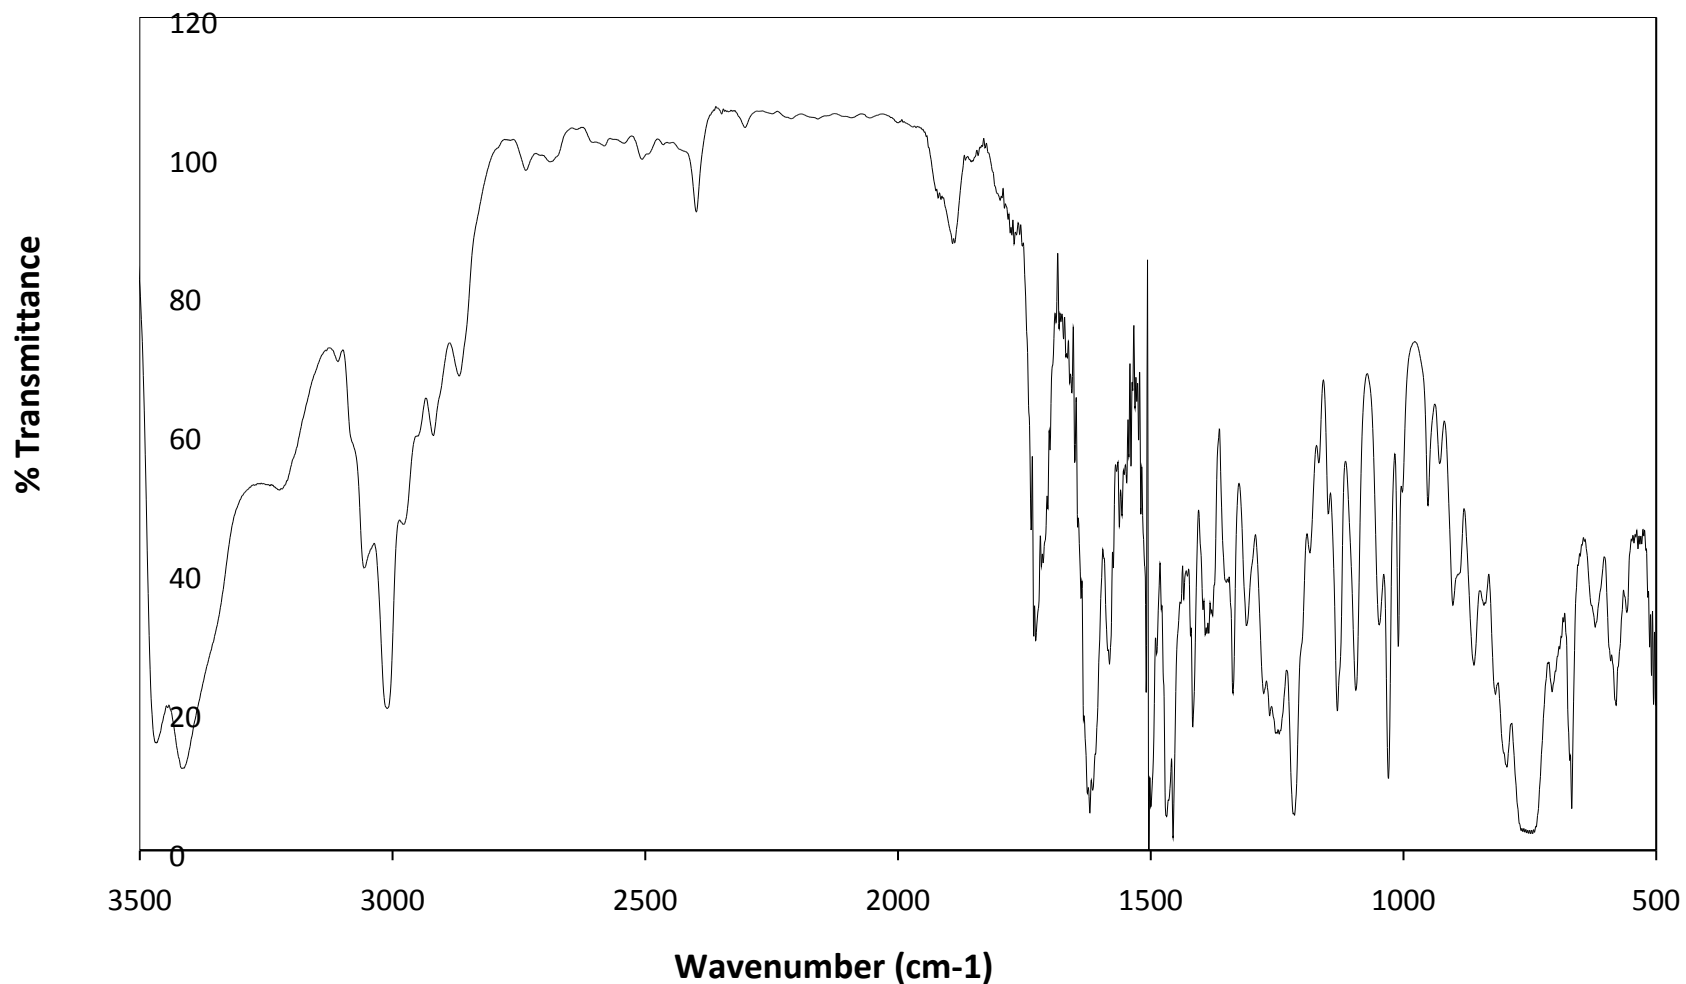

IR (KBr, cm<sup>-1</sup>): 3468 (s), 3415 (s), 3223 (m), 3057 (m), 3010 (s), 2976 (m), 2922 (w), 2868 (m), 1728 (w), 1620 (s), 1581 (m), 1504 (s), 1467 (s), 1456 (s), 1417 (m), 1392 (m), 1336 (s), 1309 (m), 1276 (m), 1265 (m), 1249 (m), 1130 (m), 1093 (m), 1047 (m), 1029 (s), 101 (m), 950 (w), 927 (w), 902 (m), 860 (m), 817 (m), 794 (s), 752 (br, s), 721 (m), 667 (s), 621 (m).

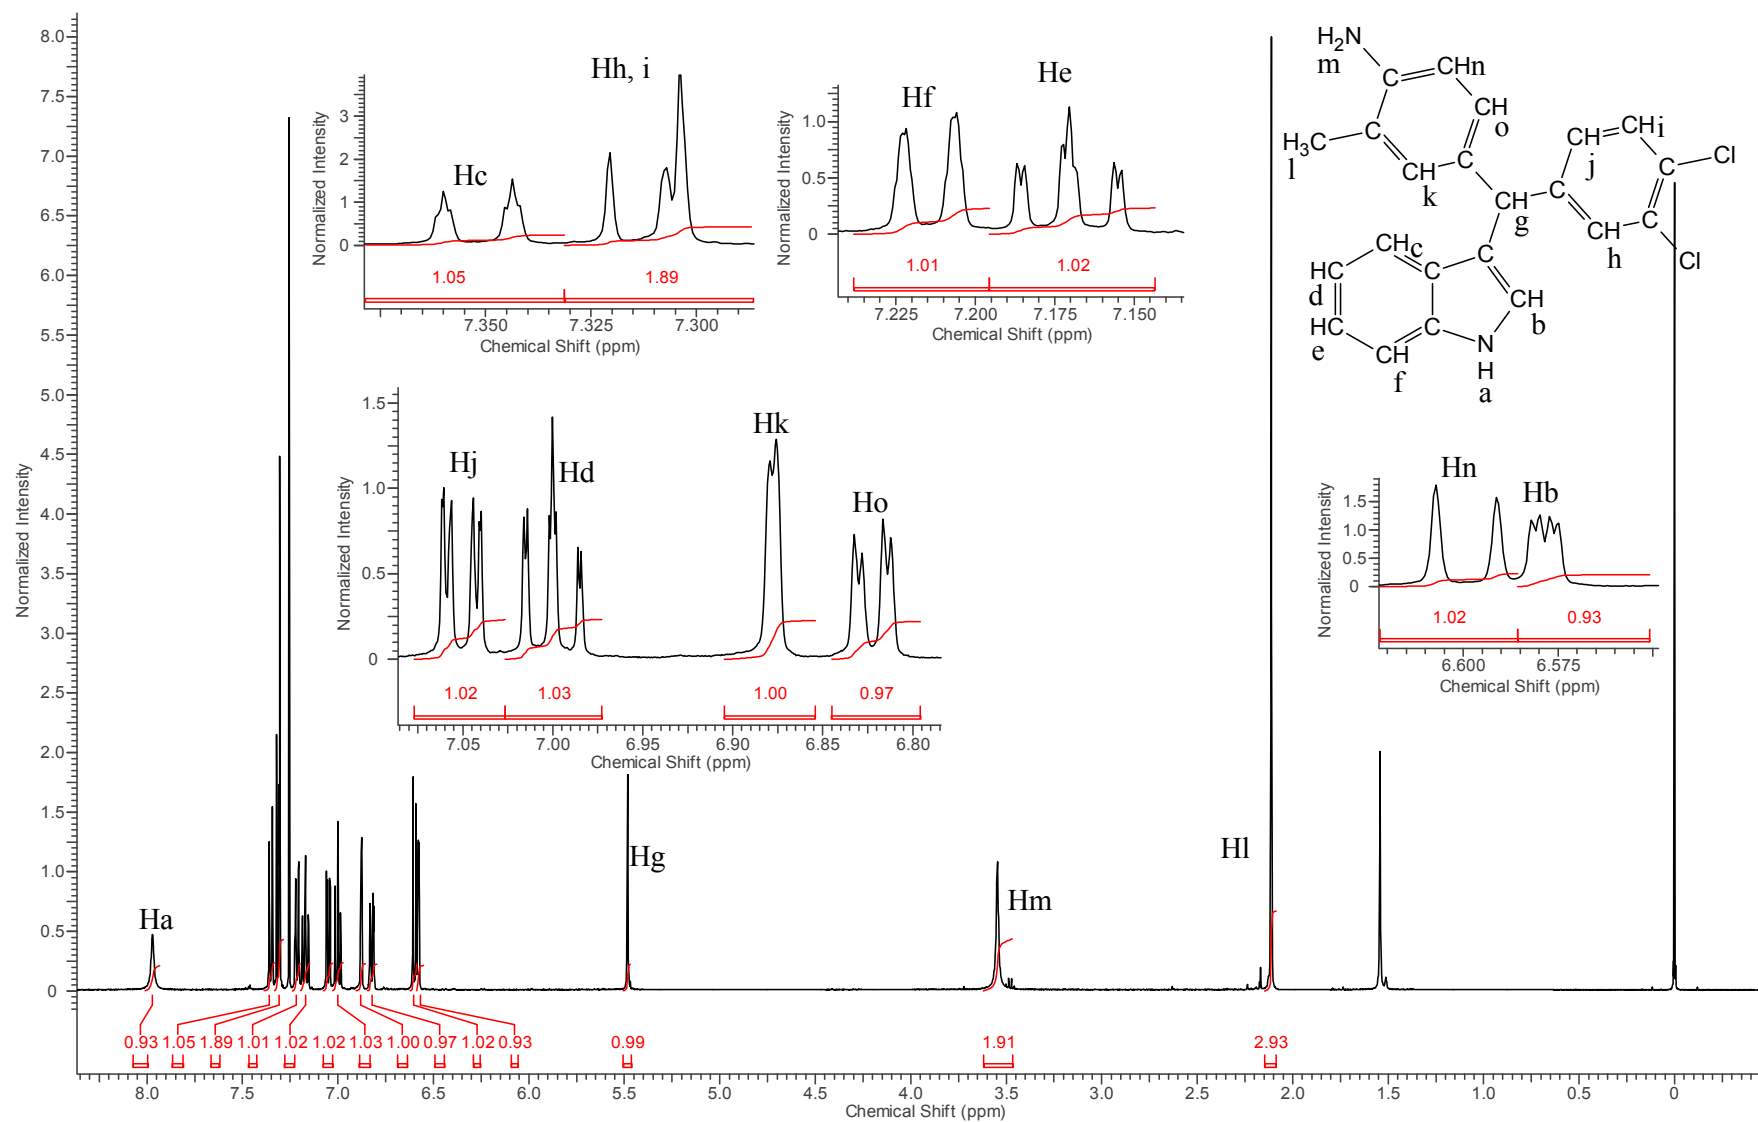

<sup>1</sup>H NMR (500MHz, CDCl<sub>3</sub>)  $\delta$  = 7.97 (br s, 1 H), 7.36 (d,  $J$  = 8.2 Hz, 1 H), 7.33 - 7.29 (m, 2 H), 7.21 (d,  $J$  = 7.9 Hz, 1 H), 7.17 (ddd,  $J$  = 1.2, 7.0, 7.7 Hz, 1 H), 7.05 (dd,  $J$  = 2.4 Hz, 8.3 Hz, 1 H), 7.00 (ddd,  $J$  = 0.9, 7.0, 8.2 Hz, 1 H), 6.88 (d,  $J$  = 2.1 Hz, 1 H), 6.82 (dd,  $J$  = 2.1, 7.9 Hz, 1 H), 6.60 (d,  $J$  = 7.9 Hz, 1 H), 6.58 (dd,  $J$  = 1.2, 2.4 Hz, 1 H), 5.48 (s, 1 H), 3.55 (br s, 2 H), 2.11 (s, 3 H).

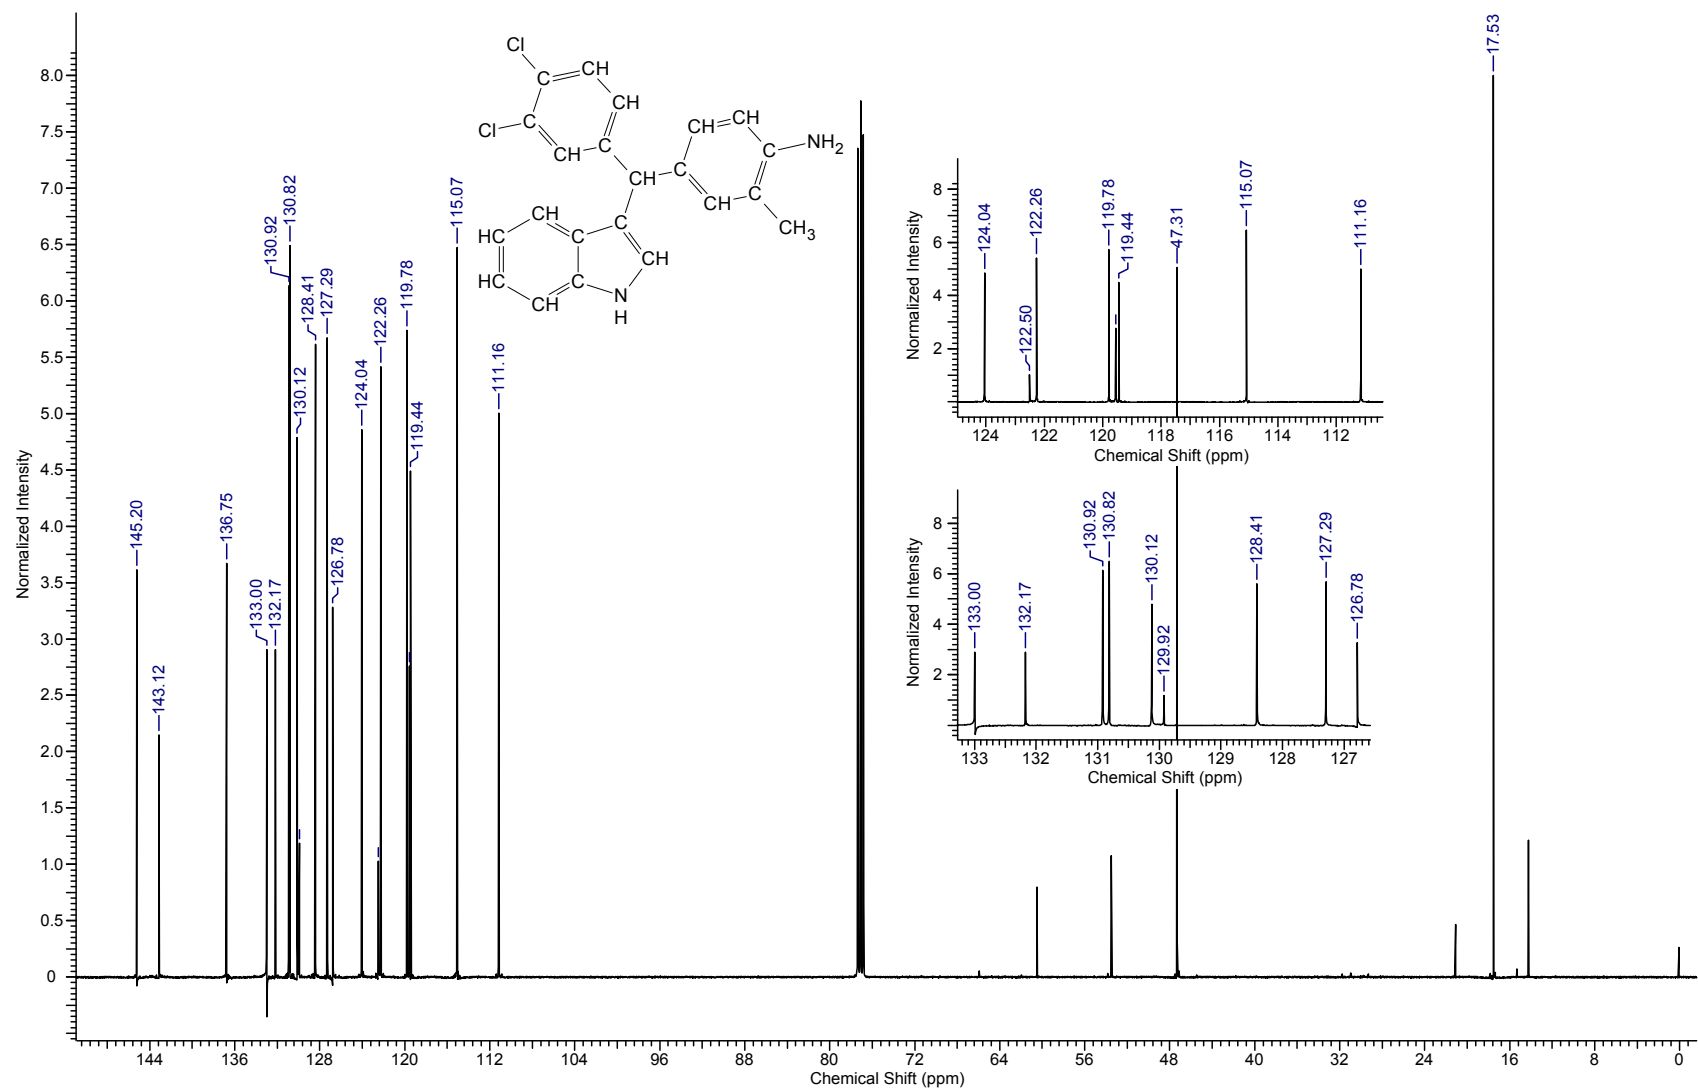

<sup>13</sup>C NMR (126 MHz, CDCl<sub>3</sub>) δ = 145.20, 143.12, 136.75, 133.00, 132.17, 130.92, 130.82, 130.12, 129.92, 128.41, 127.29, 126.78, 124.04, 122.50, 122.26, 119.78, 119.55, 119.44, 115.07, 111.16, 47.31, 17.53.

The mass spectrum of this compound was obtained using a direct probe. The following peaks were obtained:

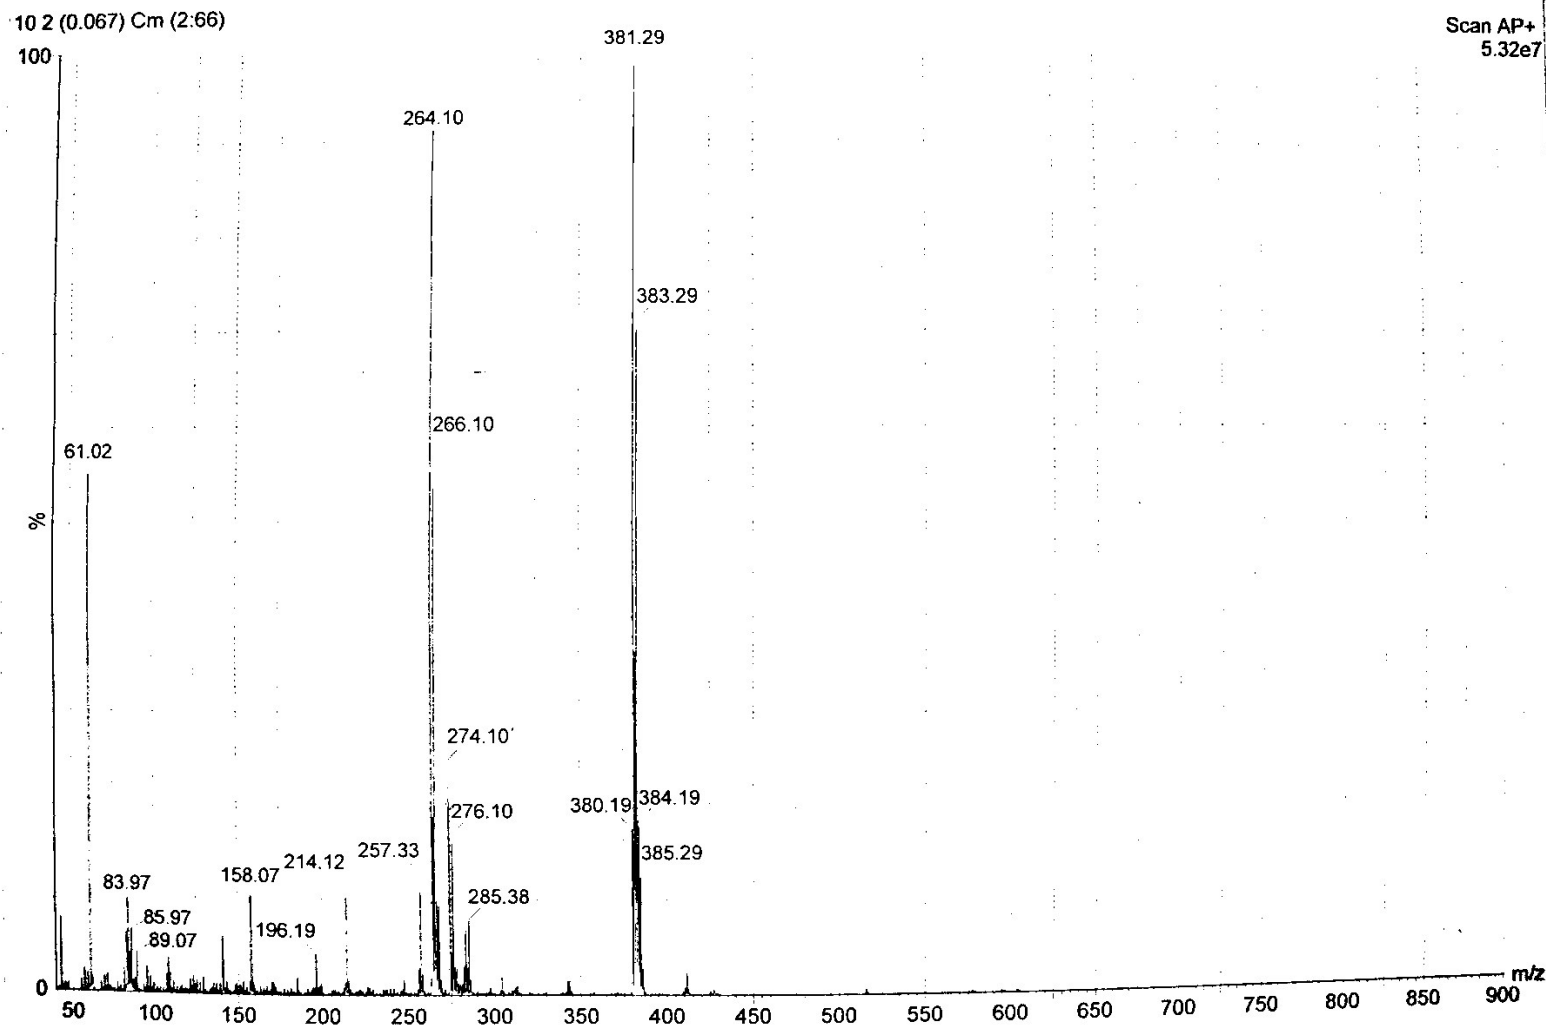

#### [4] Tertiary Amines

##### 4.1 Benzaldehyde (1a) + indole (2a) + *N,N*-dimethylaniline (5a): (6tt) 4-[1*H*-indol-3-yl(phenyl)methyl]-*N,N*-dimethylaniline

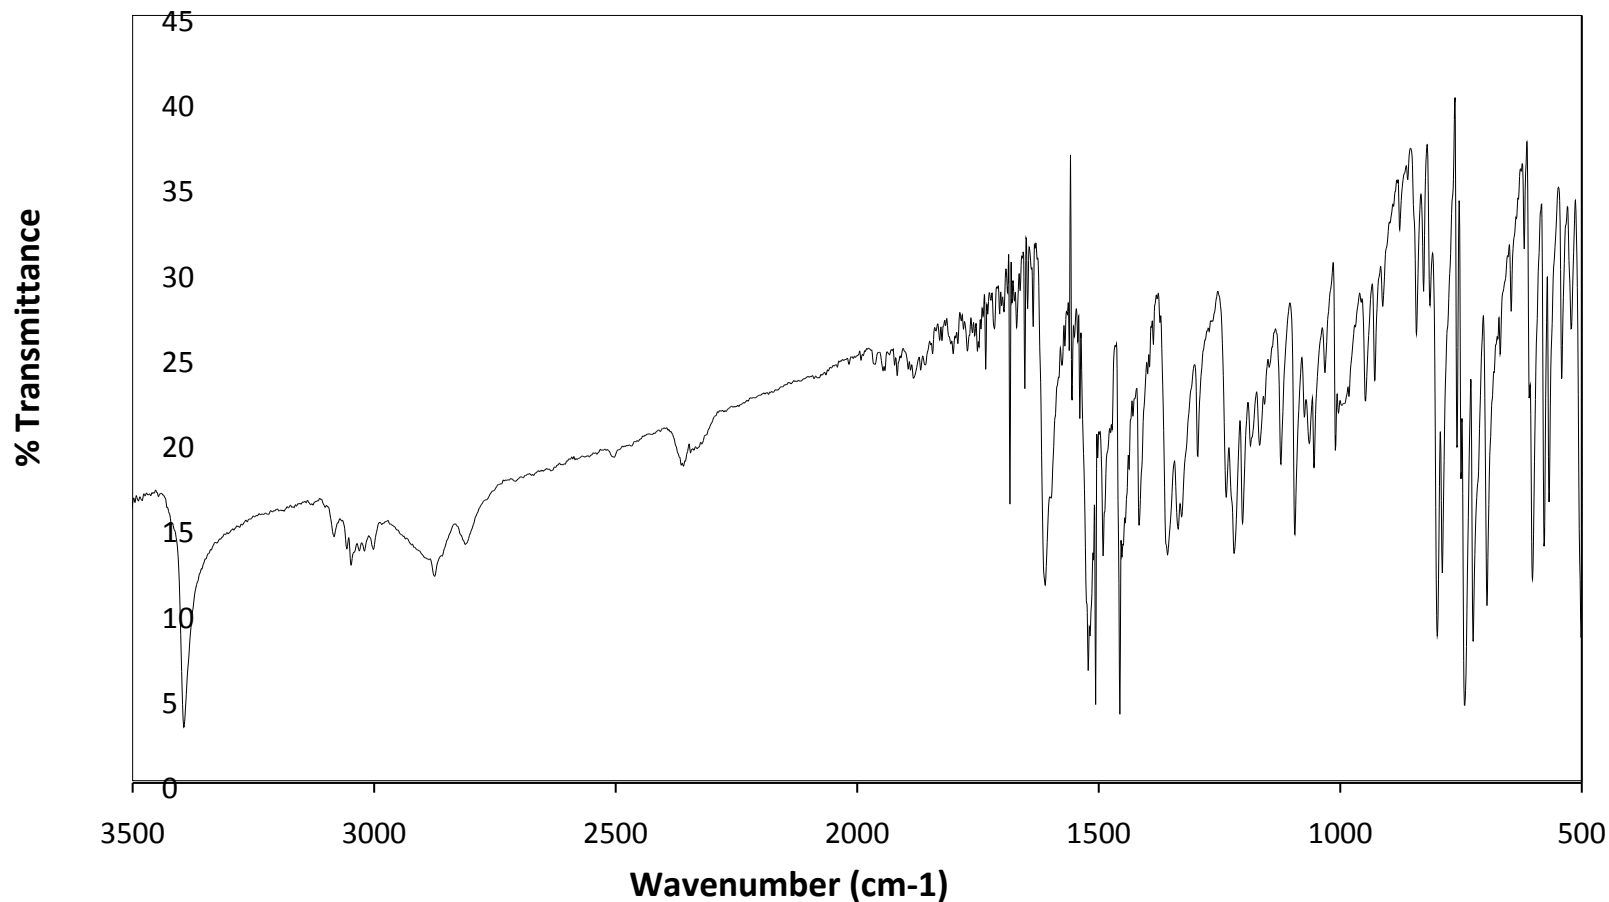

IR (KBr,  $\text{cm}^{-1}$ ): 3394 (s), 3082 (m), 3057 (m), 3047 (m), 3020 (m), 3001 (m), 2873 (m), 2810 (m), 1683 (m), 1610 (m), 1521 (s), 1506 (s), 1510 (m), 1456 (s), 1415 (m), 1357 (m), 1334 (m), 1328 (m), 1294 (w), 1236 (m), 1219 (m), 1201 (m), 1186 (w), 1166 (w), 1122 (w), 1093 (m), 1064 (w), 1055 (w), 1010 (w), 947 (w), 927 (w), 912 (w), 877 (w), 842 (w), 827 (w), 813 (w), 798 (s), 788 (m), 742 (s), 725 (s), 696 (s), 601 (m).

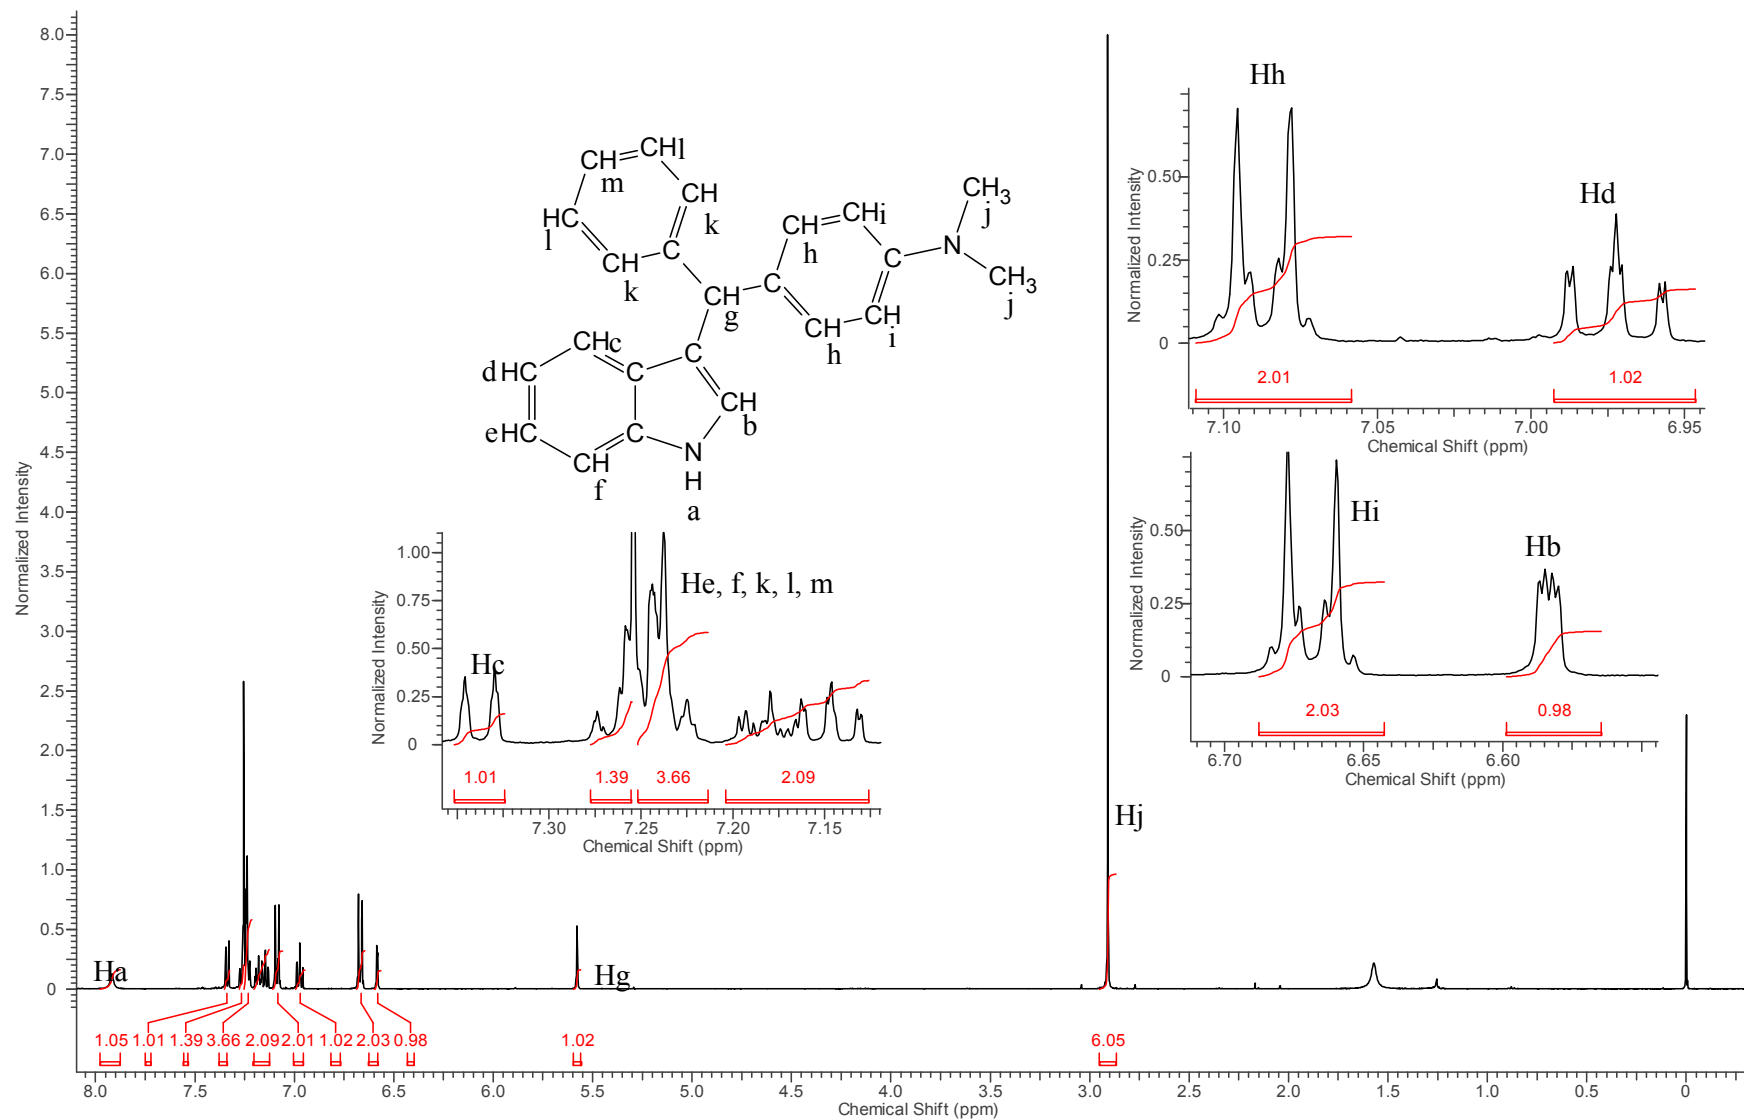

<sup>1</sup>H NMR (500MHz, CDCl<sub>3</sub>) δ = 7.34 (d, *J* = 7.9 Hz, 1 H), 7.28 - 7.26 (m, 1 H), 7.25 - 7.22 (m, 4 H), 7.21 - 7.12 (m, 2 H), 7.09 (d, *J* = 8.5 Hz, 2 H), 6.97 (ddd, *J* = 0.9, 7.0, 7.9 Hz, 1 H), 6.67 (d, *J* = 8.5 Hz, 2 H), 6.58 (dd, *J* = 1.1, 2.3 Hz, 1 H), 5.58 (s, 1 H), 2.91 (s, 6 H).

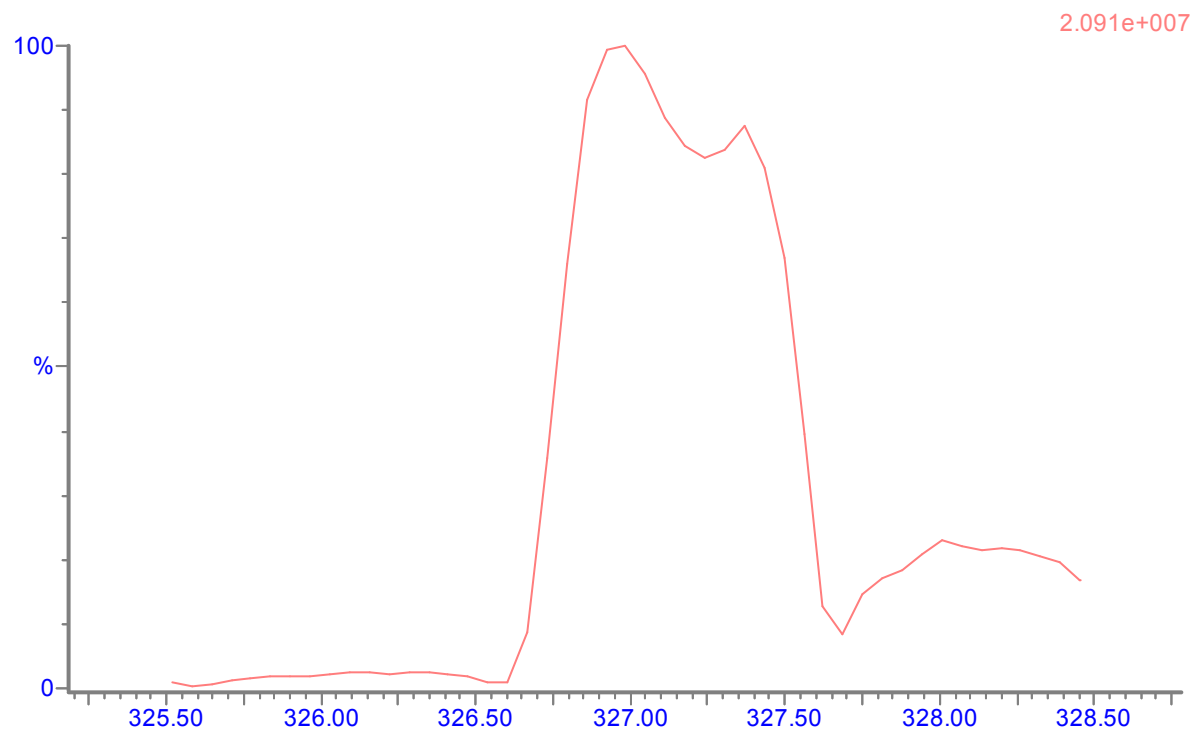

| Formula Mass | Daughter number | Parent m/z | Cone Voltage (V) | Daughters | Collision Energy (eV) | Ion Mode |
|--------------|-----------------|------------|------------------|-----------|-----------------------|----------|
| 326.43       | 1               | 327.10     | 38               | 235.13    | 32                    | ES+      |
|              | 2               | 327.10     | 38               | 312.07    | 24                    | ES+      |
|              | 3               | 327.10     | 38               | 204.17    | 54                    | ES+      |
|              | 4               | 327.10     | 38               | 219.79    | 50                    | ES+      |



**4.2 4-methylbenzaldehyde (1b) + indole (2a) + *N,N*-dimethylaniline (5a): (6uu) 4-[1*H*-indol-3-yl(4-methylphenyl)methyl]-*N,N*-dimethylaniline**

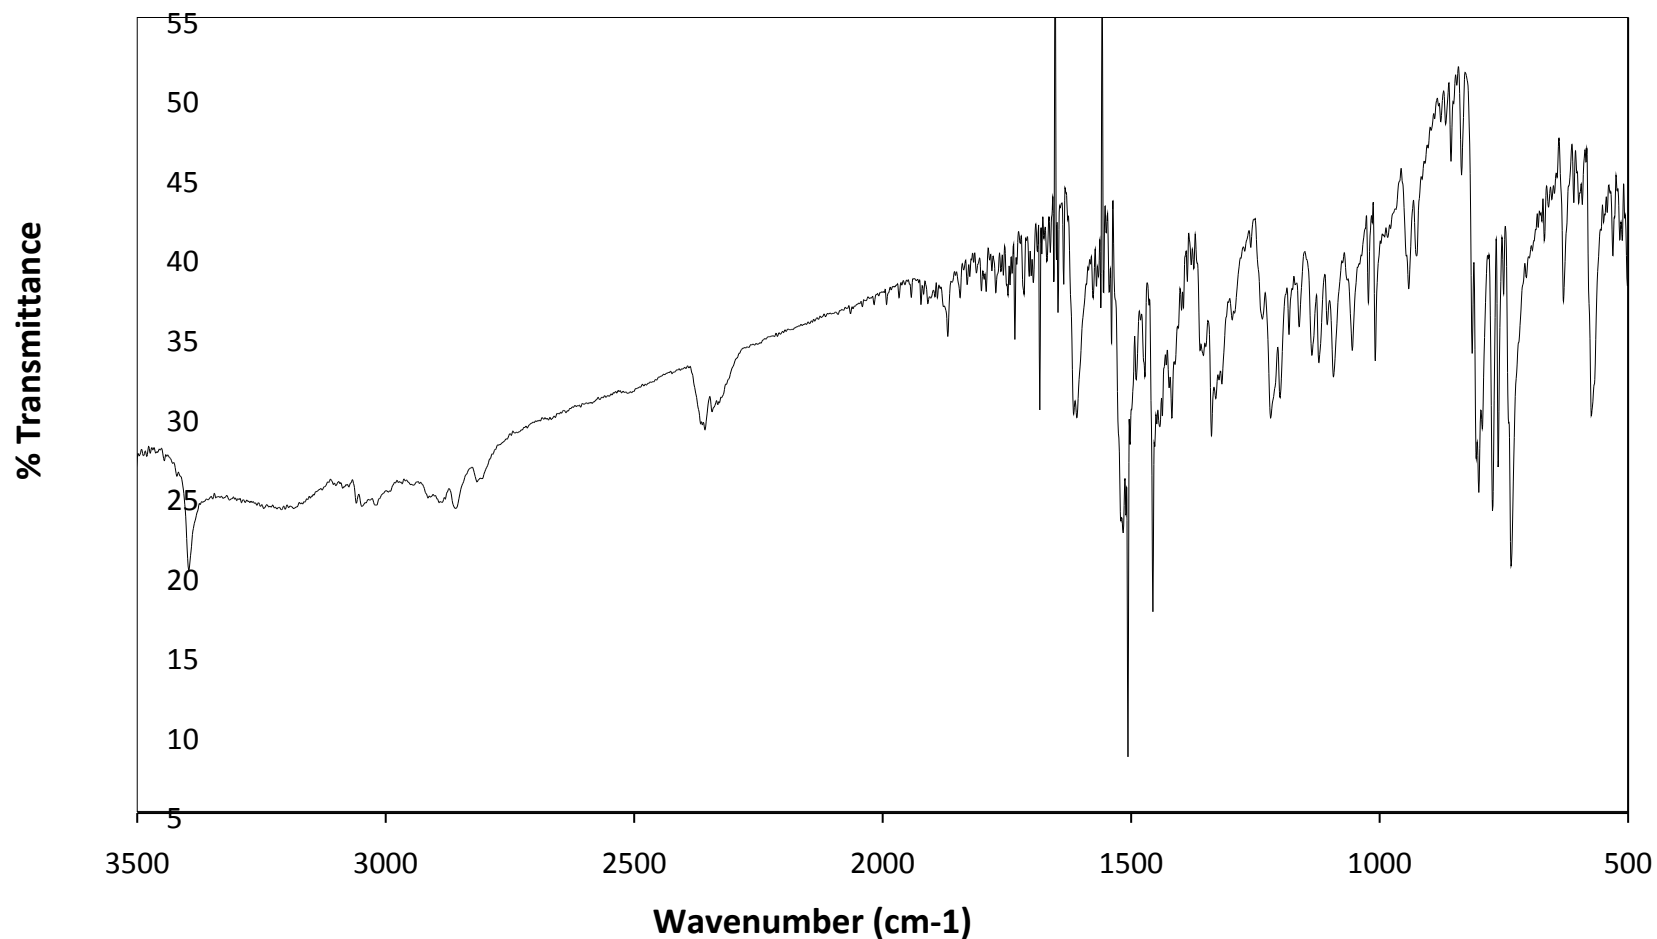

IR (KBr, cm<sup>-1</sup>): 3396 (m), 3207 (br, m), 3059 (m), 3047 (m), 3018 (m), 2995 (m), 2914 (m), 2891 (m), 2858 (m), 2816 (m), 1683 (m), 1616 (m), 1608 (m), 1516 (m), 1506 (s), 1456 (s), 1417 (m), 1357 (m), 1338 (m), 1317 (m), 1296 (w), 1236 (w), 1219 (m), 1199 (m), 1182 (w), 1161 (w), 1136 (m), 1122 (m), 1093 (m), 1055 (m), 1022 (w), 1008 (m), 941 (w), 925 (w), 856 (m), 835 (m), 800 (m), 773 (m), 761 (m), 734 (m), 630 (w).

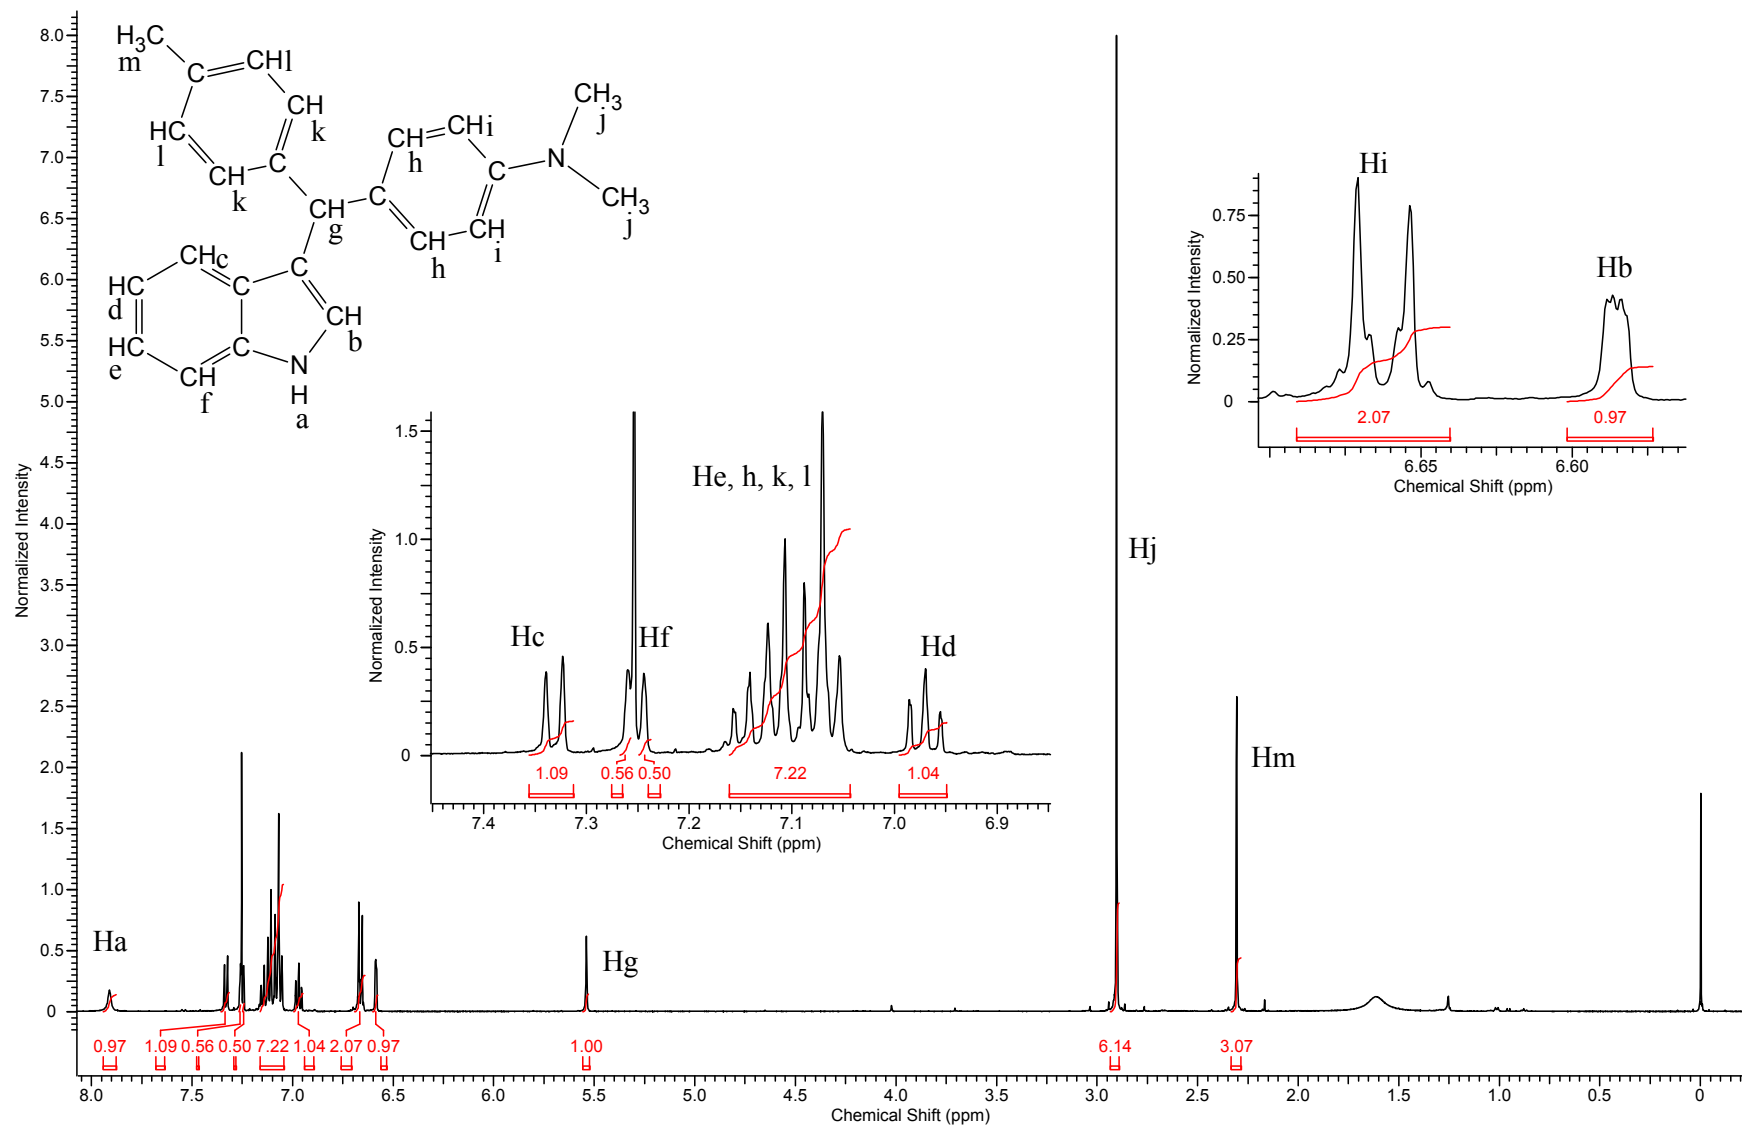

<sup>1</sup>H NMR (500MHz, CDCl<sub>3</sub>) δ = 7.91 (br s, 1 H), 7.33 (d, *J* = 8.2 Hz, 1 H), 7.26 (d, *J* = 7.9 Hz, 1 H), 7.16 - 7.04 (m, 7 H), 6.97 (t, *J* = 7.5 Hz, 1 H), 6.60 (d, *J* = 8.5 Hz, 1 H), 5.54 (s, 1 H), 2.90 (s, 6 H), 2.31 (s, 3 H).

**4.3 4-bromobenzaldehyde (1n) + indole (2a) + *N,N*-dimethylaniline (5a): (6vv) 4-[1*H*-indol-3-yl(4-bromophenyl)methyl]-*N,N*-dimethylaniline**

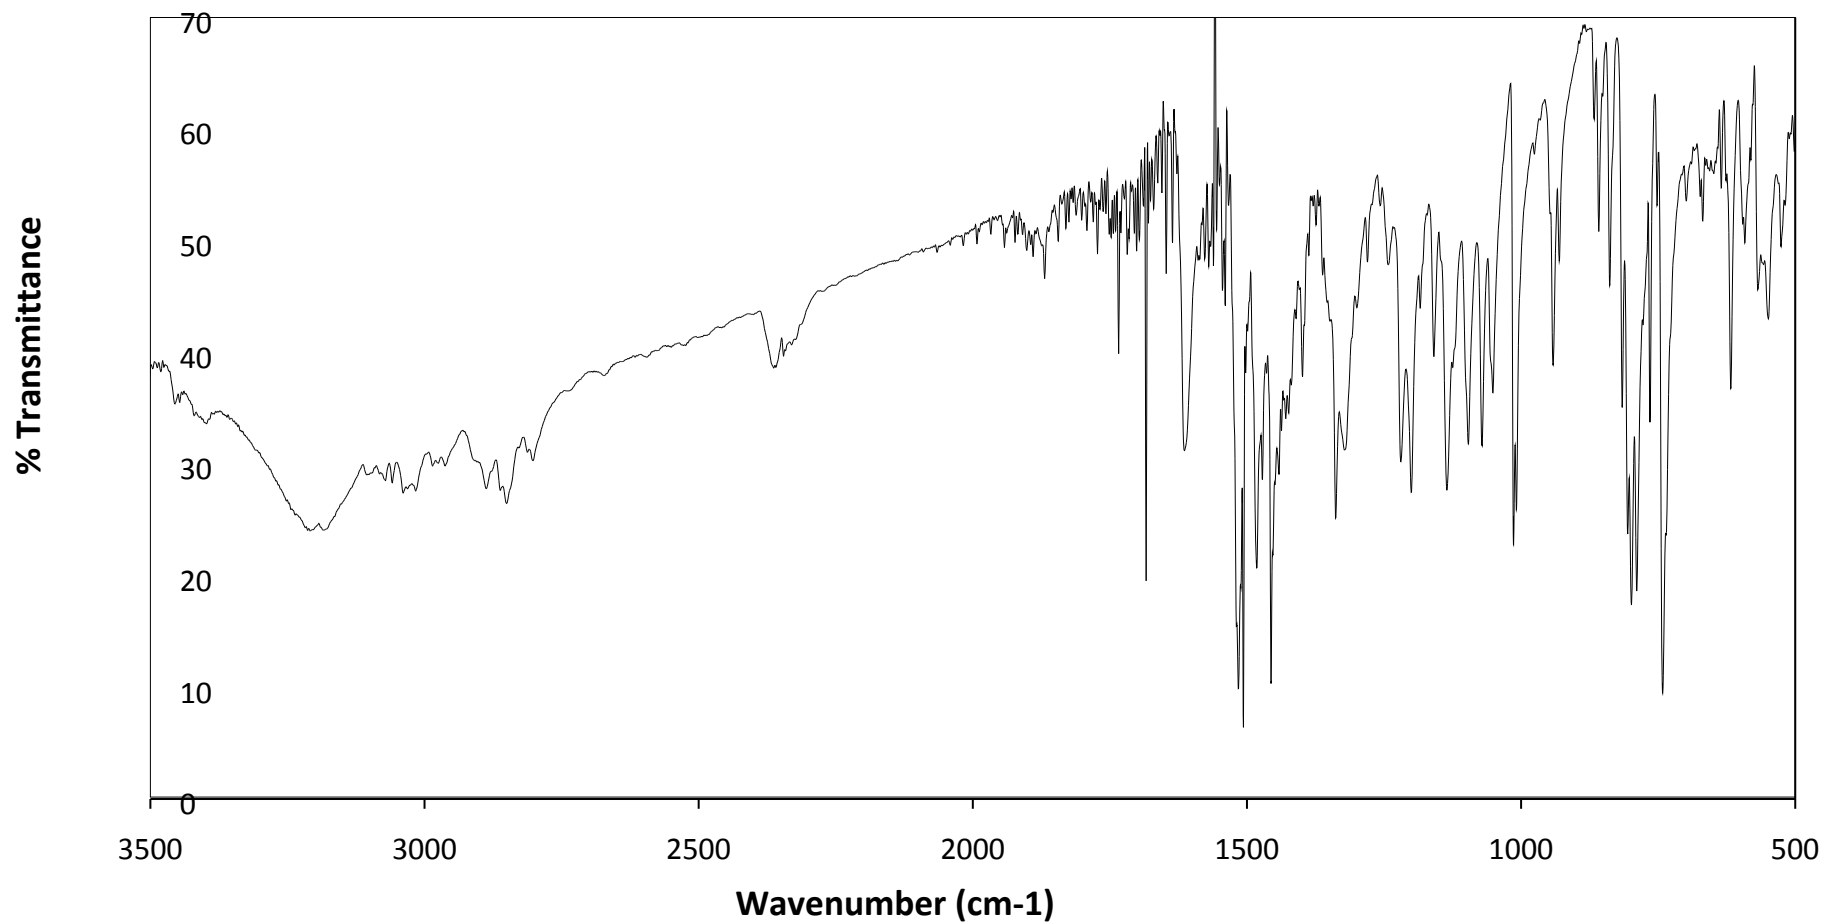

IR (KBr,  $\text{cm}^{-1}$ ): 3402 (m), 3213 (m), 3182 (m), 3105 (m), 3070 (m), 3059 (m), 3039 (m), 3014 (m), 2985 (m), 2962 (m), 2887 (m), 2848 (m), 2802 (m), 1734 (w), 1683 (m), 1614 (m), 1516 (s), 1506 (s), 1481 (m), 1471 (m), 1456 (s), 1398 (w), 1338 (m), 1321 (m), 1280 (w), 1242 (w), 1219 (m), 1199 (m), 1184 (w), 1159 (w), 1136 (m), 1095 (m), 1070 (m), 1051 (m), 1014 (m), 1008 (m), 941 (m), 929 (w), 858 (w), 839 (w), 815 (m), 806 (m), 798 (s), 788 (s), 765 (m), 742 (s), 669 (w), 617 (m).

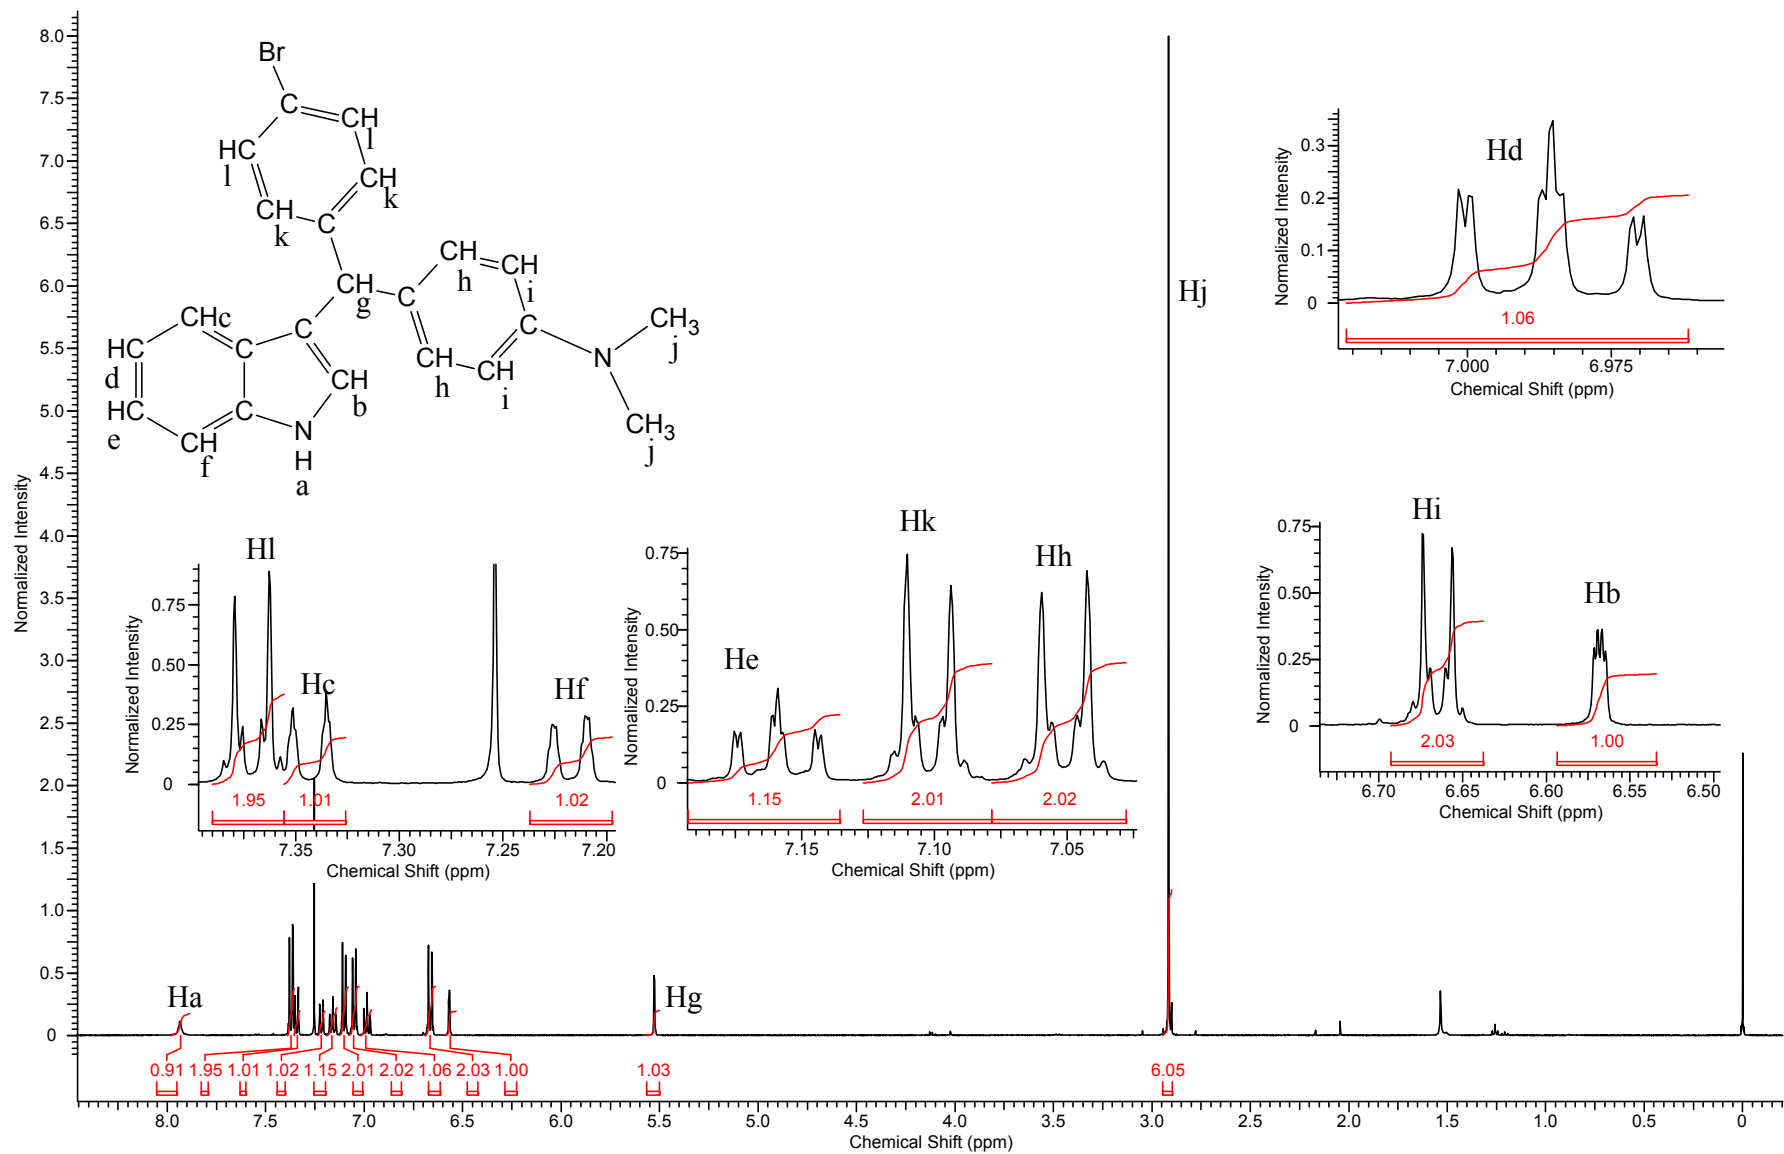

<sup>1</sup>H NMR (500 MHz, CDCl<sub>3</sub>)  $\delta$  = 7.93 (br s, 1H), 7.37 (d,  $J$  = 8.2 Hz, 2H), 7.34 (d,  $J$  = 7.9 Hz, 1H), 7.22 (d,  $J$  = 7.9 Hz, 1H), 7.16 (ddd,  $J$  = 0.9, 7.2, 7.9 Hz, 1H), 7.10 (d,  $J$  = 8.2 Hz, 2H), 7.05 (d,  $J$  = 8.5 Hz, 2H), 6.99 (ddd,  $J$  = 0.9, 7.2, 8.2 Hz, 1H), 6.67 (d,  $J$  = 8.5 Hz, 2H), 6.57 (dd,  $J$  = 1.1, 2.3 Hz, 1H), 5.53 (s, 1H), 2.92 (s, 6H).

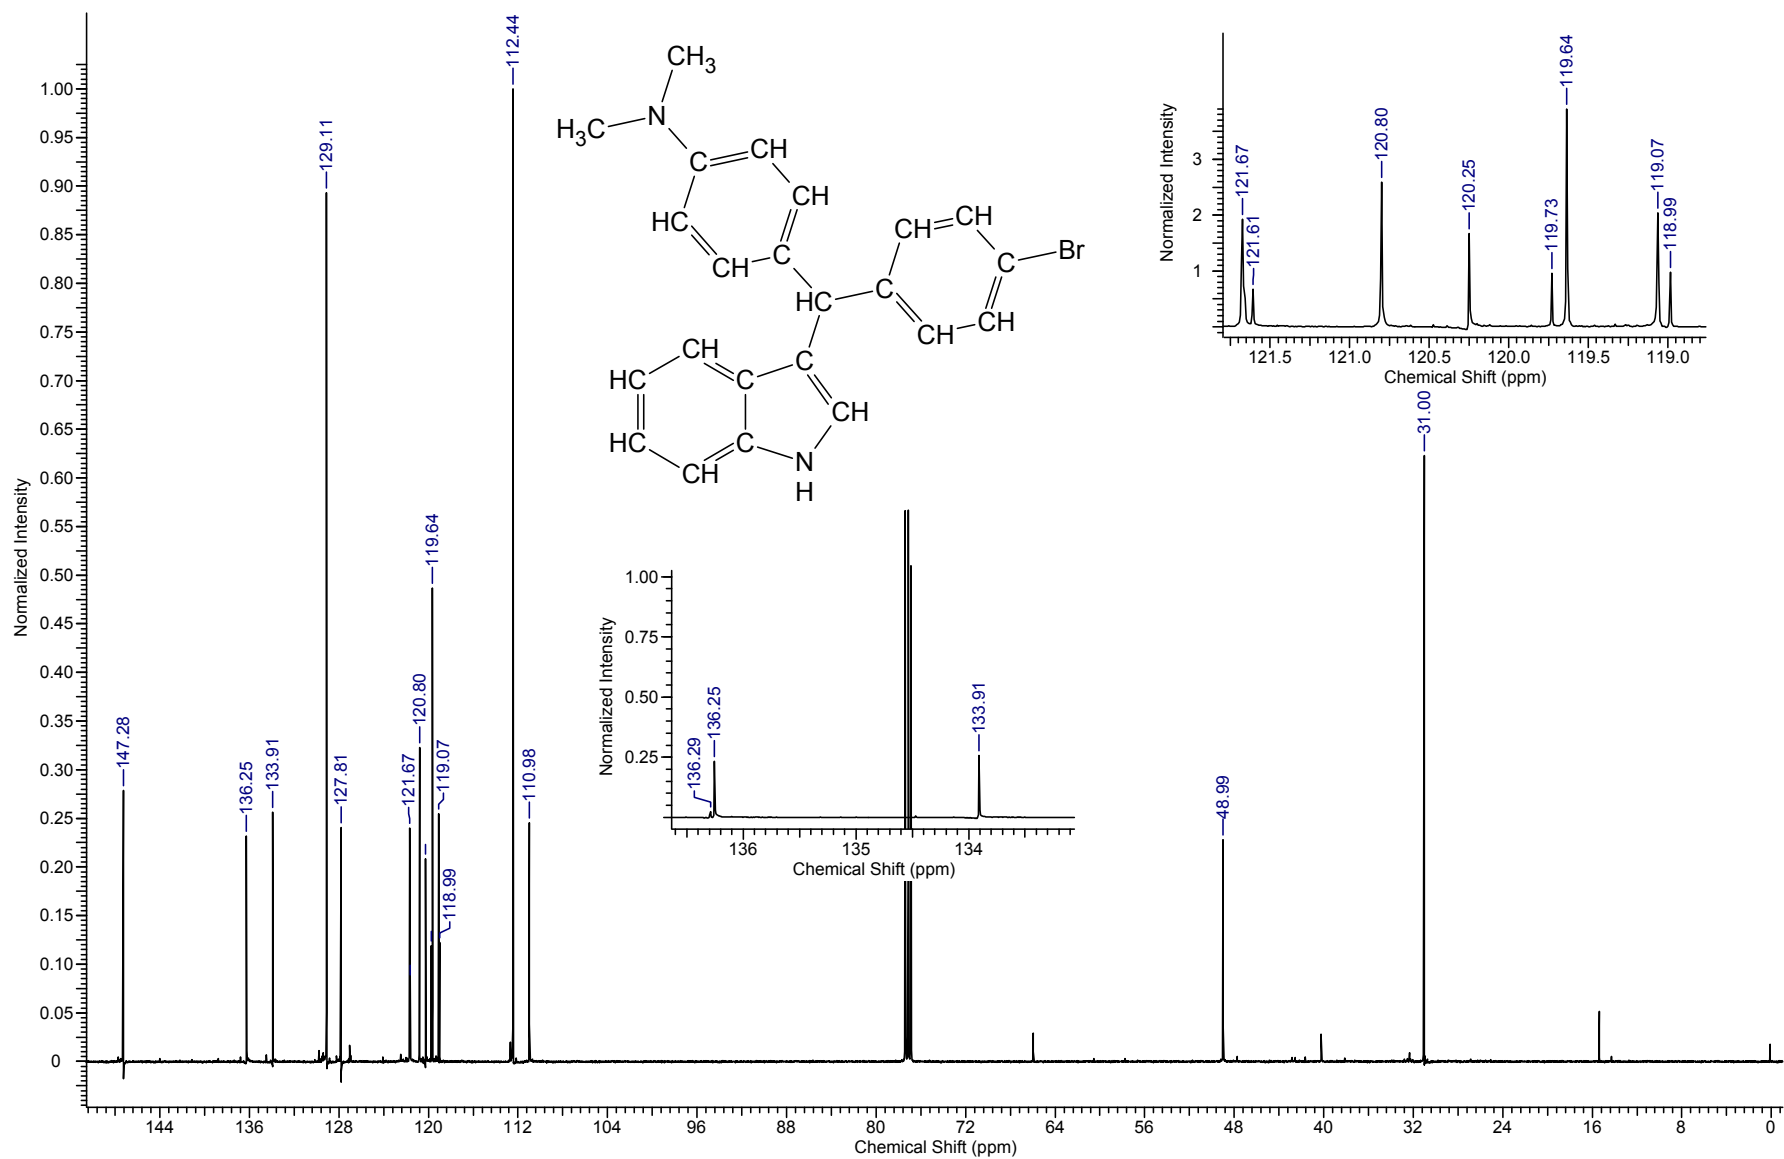

<sup>13</sup>C NMR (126 MHz, CDCl<sub>3</sub>) δ = 147.28, 136.29, 136.25(s), 133.91, 129.11, 127.81, 121.67, 121.61, 120.80, 120.25, 119.73, 119.64, 119.07, 118.99, 112.44, 110.98, 48.99, 31.00.

The mass spectrum of this compound was obtained using a direct probe. The following peaks were obtained:

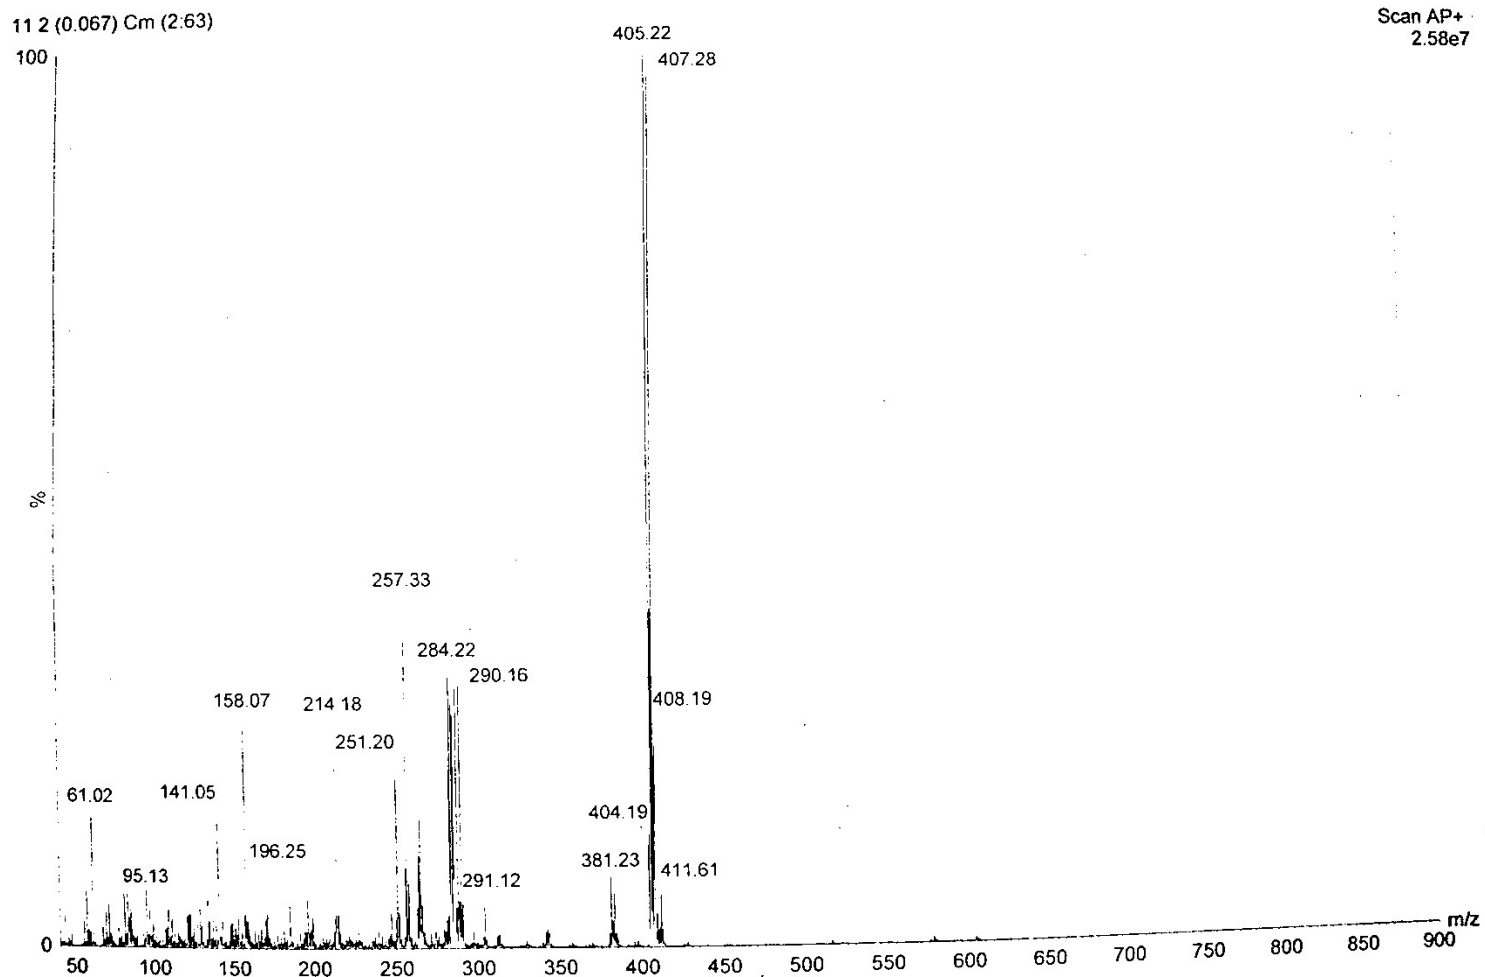

[5] Other nucleophilic species

5.1 4-methylbenzaldehyde (1b) + N-methylindole (2b) + N-Methylaniline (3a): (6ww) N,N-dimethyl-4-[(1-methyl-1H-indol-3-yl)(phenyl)methyl]aniline

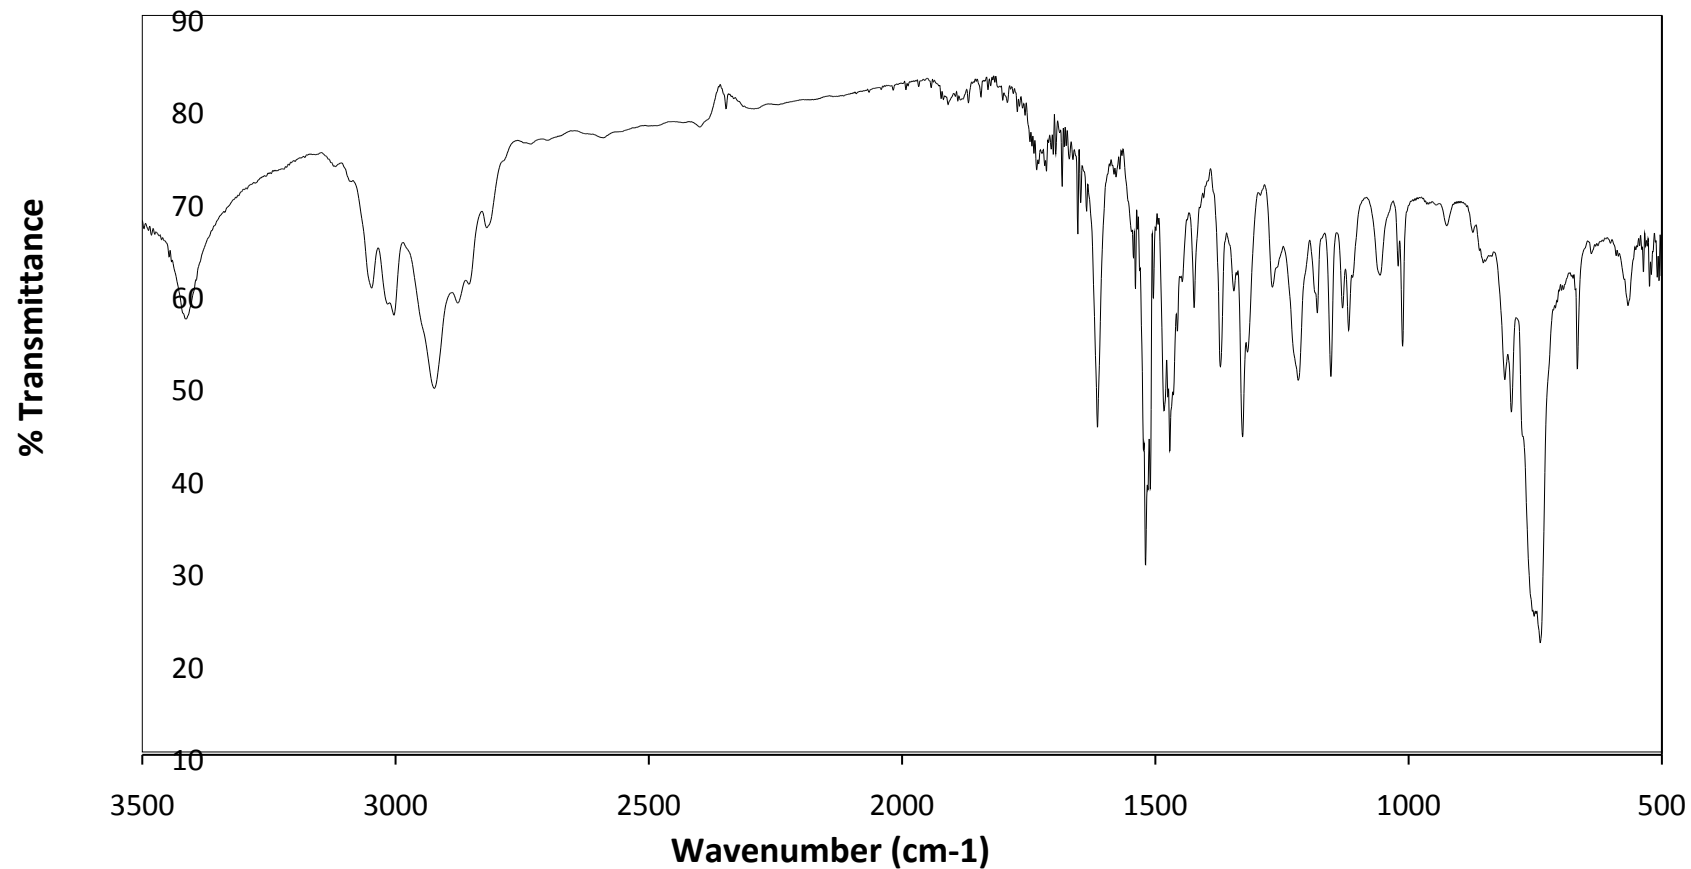

IR (KBr, cm<sup>-1</sup>): 3412 (m), 3049 (m), 3003 (m), 2924 (m), 2875 (m), 2854 (m), 2819 (w), 1614 (m), 1549 (w), 1519 (s), 1510 (m), 1483 (m), 1471 (m), 1423 (w), 1371 (m), 1345 (w), 1327 (m), 1323 (m), 1269 (w), 1217 (m), 1180 (w), 1153 (m), 1130 (w), 1118 (w), 1055 (w), 1012 (w), 852 (w), 810 (m), 796 (m), 752 (s), 740 (s), 667 (m).

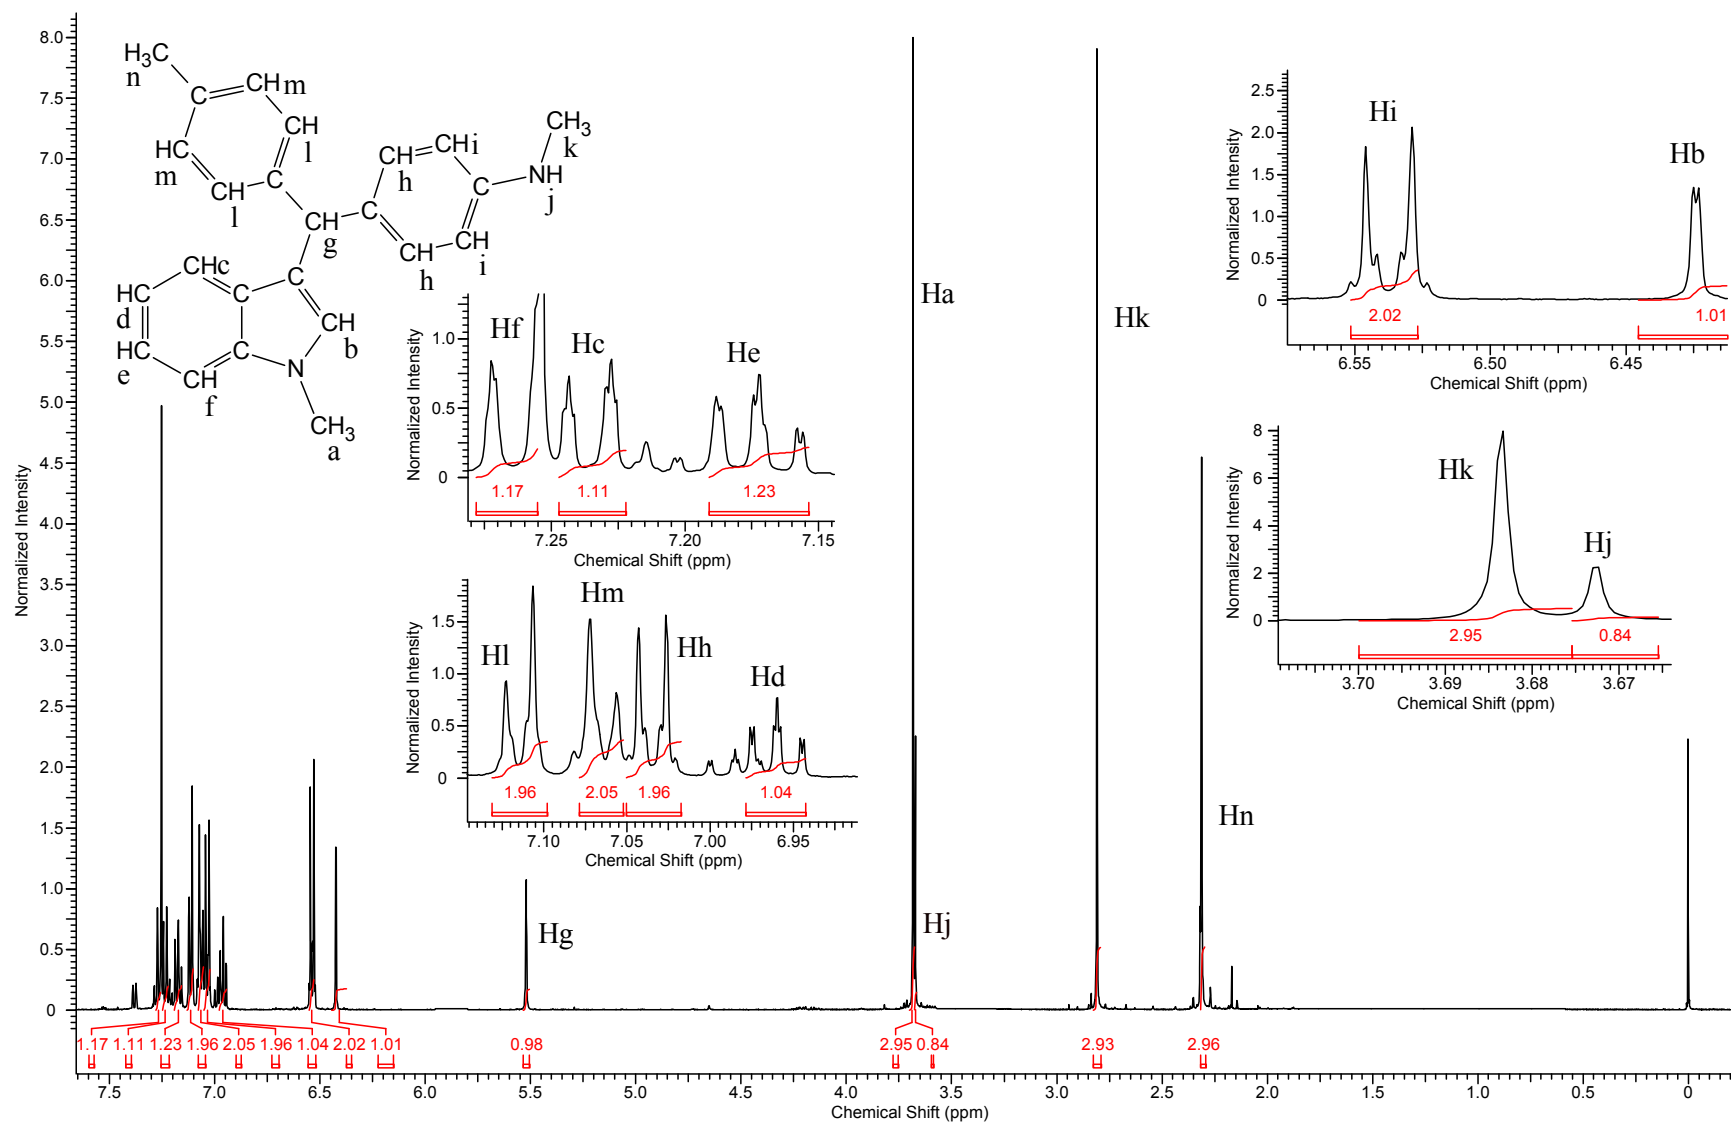

<sup>1</sup>H NMR (500MHz, CDCl<sub>3</sub>)  $\delta$  = 7.27 (d,  $J$  = 8.2 Hz, 1 H), 7.24 (d,  $J$  = 7.9 Hz, 1 H), 7.16 (ddd,  $J$  = 0.9, 7.0, 7.6 Hz, 1 H), 7.12 (d,  $J$  = 7.9 Hz, 2 H), 7.06 (d,  $J$  = 7.9 Hz, 2 H), 7.03 (d,  $J$  = 8.5 Hz, 2 H), 6.95 (ddd,  $J$  = 0.9, 6.9 Hz, 8.0 Hz, 1 H), 6.54 (d,  $J$  = 8.5 Hz, 1 H), 6.42 (d,  $J$  = 0.9 Hz, 1 H), 5.52 (s, 1 H), 3.68 (s, 3 H), 3.67 (s, 1 H), 2.81 (s, 3 H), 2.31 (s, 3 H).



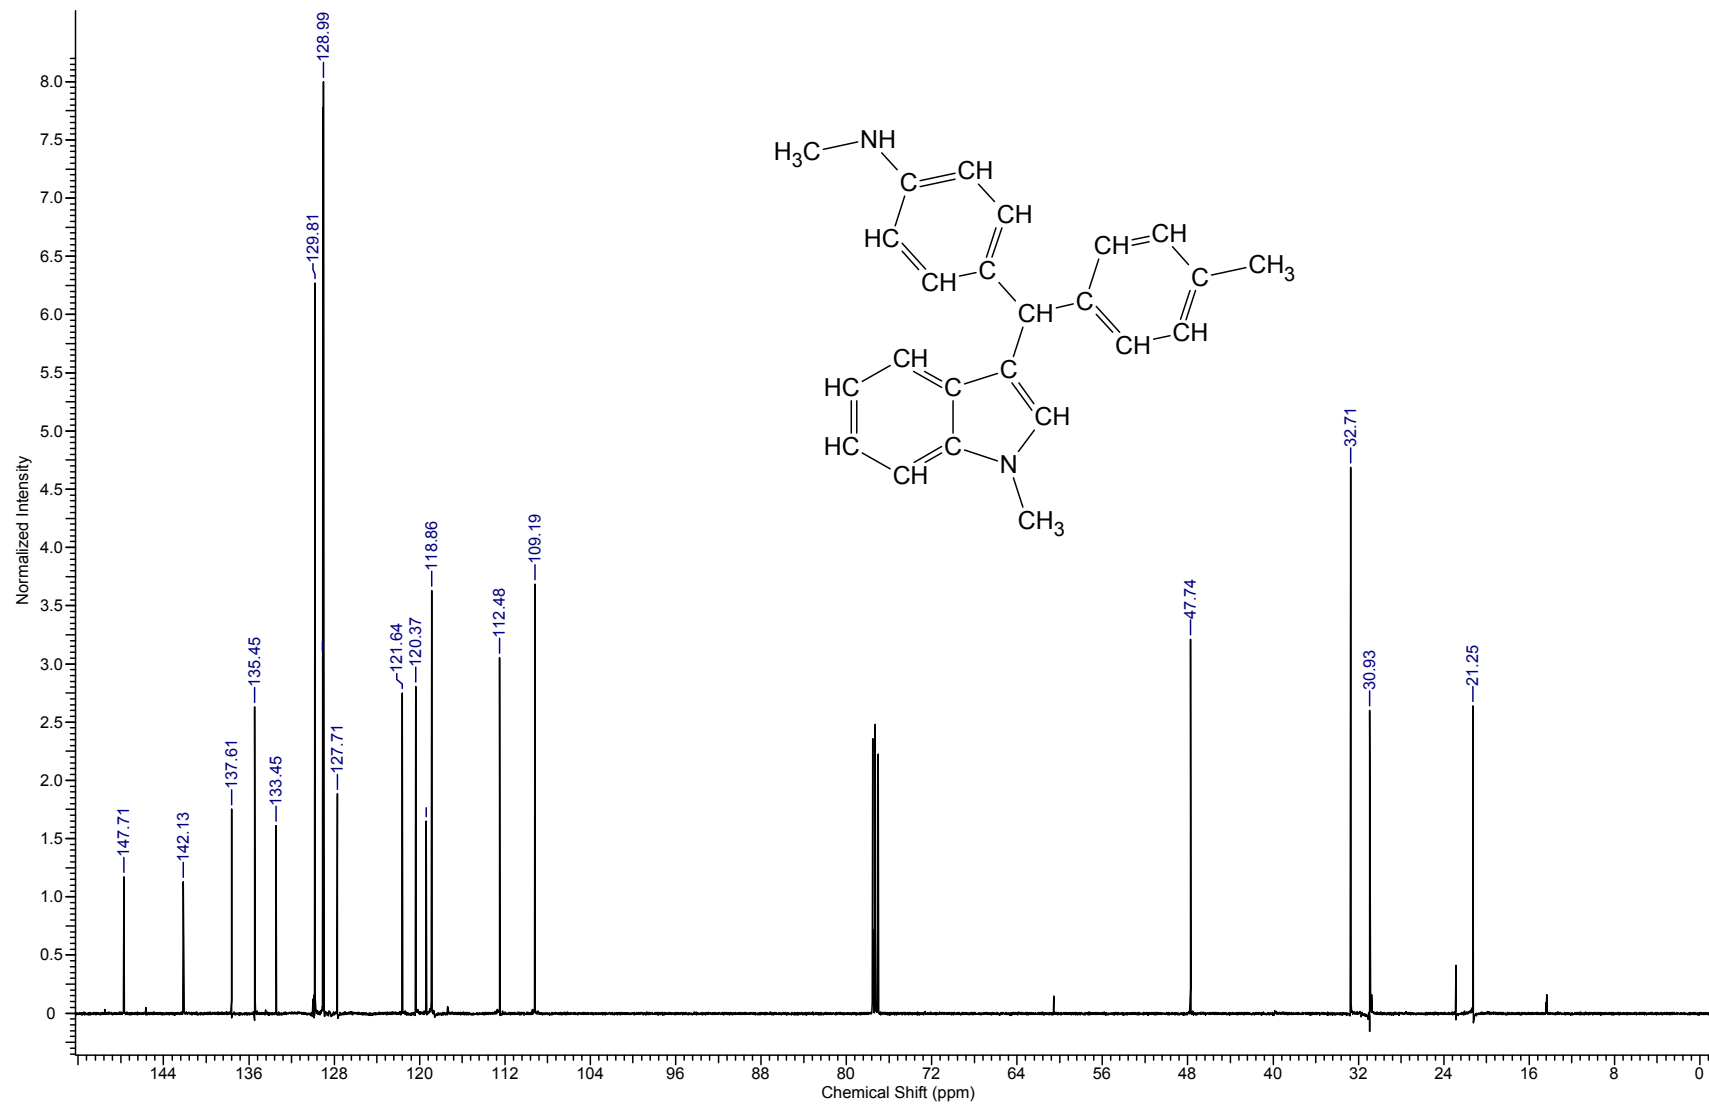

<sup>13</sup>C NMR (126 MHz, CDCl<sub>3</sub>) δ = 147.71, 142.13, 137.61, 135.45, 133.45, 129.81, 129.08, 129.05, 128.99, 127.71, 121.64, 120.37, 119.37, 118.86, 112.48, 109.19, 47.74, 32.71, 30.93, 21.25.

The mass spectrum of this compound was obtained using a direct probe. The following peaks were obtained:

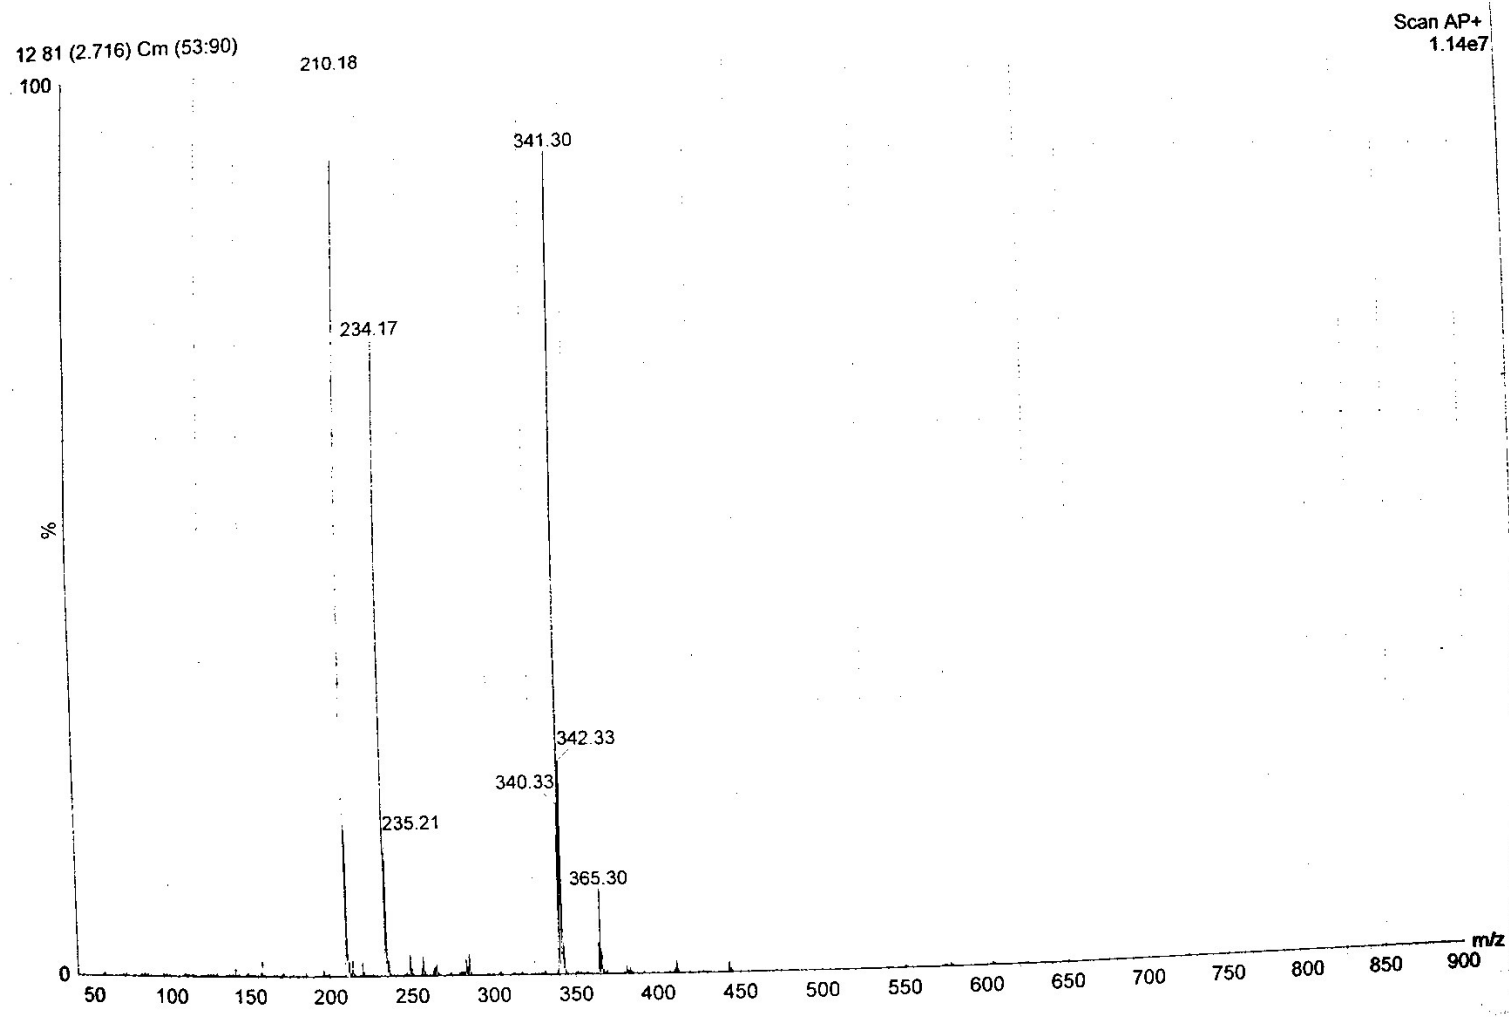

**5.2 4-nitrobenzaldehyde (1f) + N-methylindole (2a) + N-methylaniline (3a): (6xx) N,N-dimethyl-4-[(1-methyl-1H-indol-3-yl)(4-nitrophenyl)methyl]aniline**

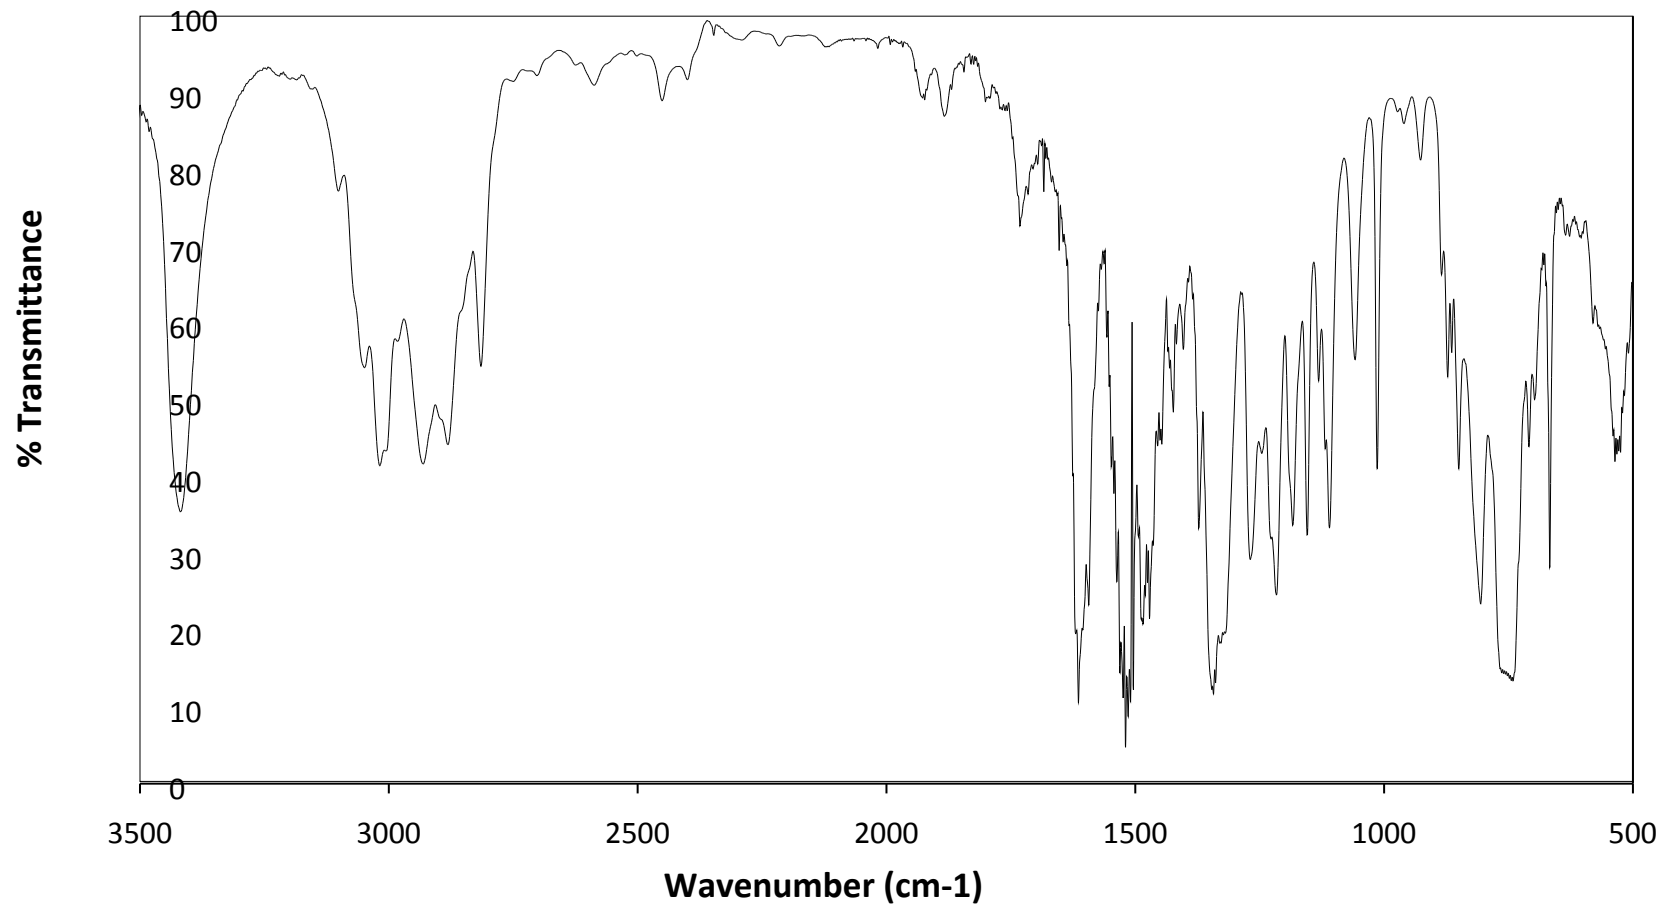

IR (KBr,  $\text{cm}^{-1}$ ): 3419 (m), 3101 (w), 3049 (m), 3018 (s), 2929 (m), 2881 (m), 2814 (m), 1614 (s), 1602 (s), 1519 (s), 1485 (s), 1471 (s), 1423 (m), 1371 (m), 1342 (s), 1269 (m), 1217 (m), 1184 (m), 1155 (m), 1132 (m), 1109 (m), 1058 (m), 1014 (m), 925 (w), 871 (m), 850 (m), 806 (m), 742 (s), 709 (m), 698 (m), 667 (m), 628 (w), 603 (w).

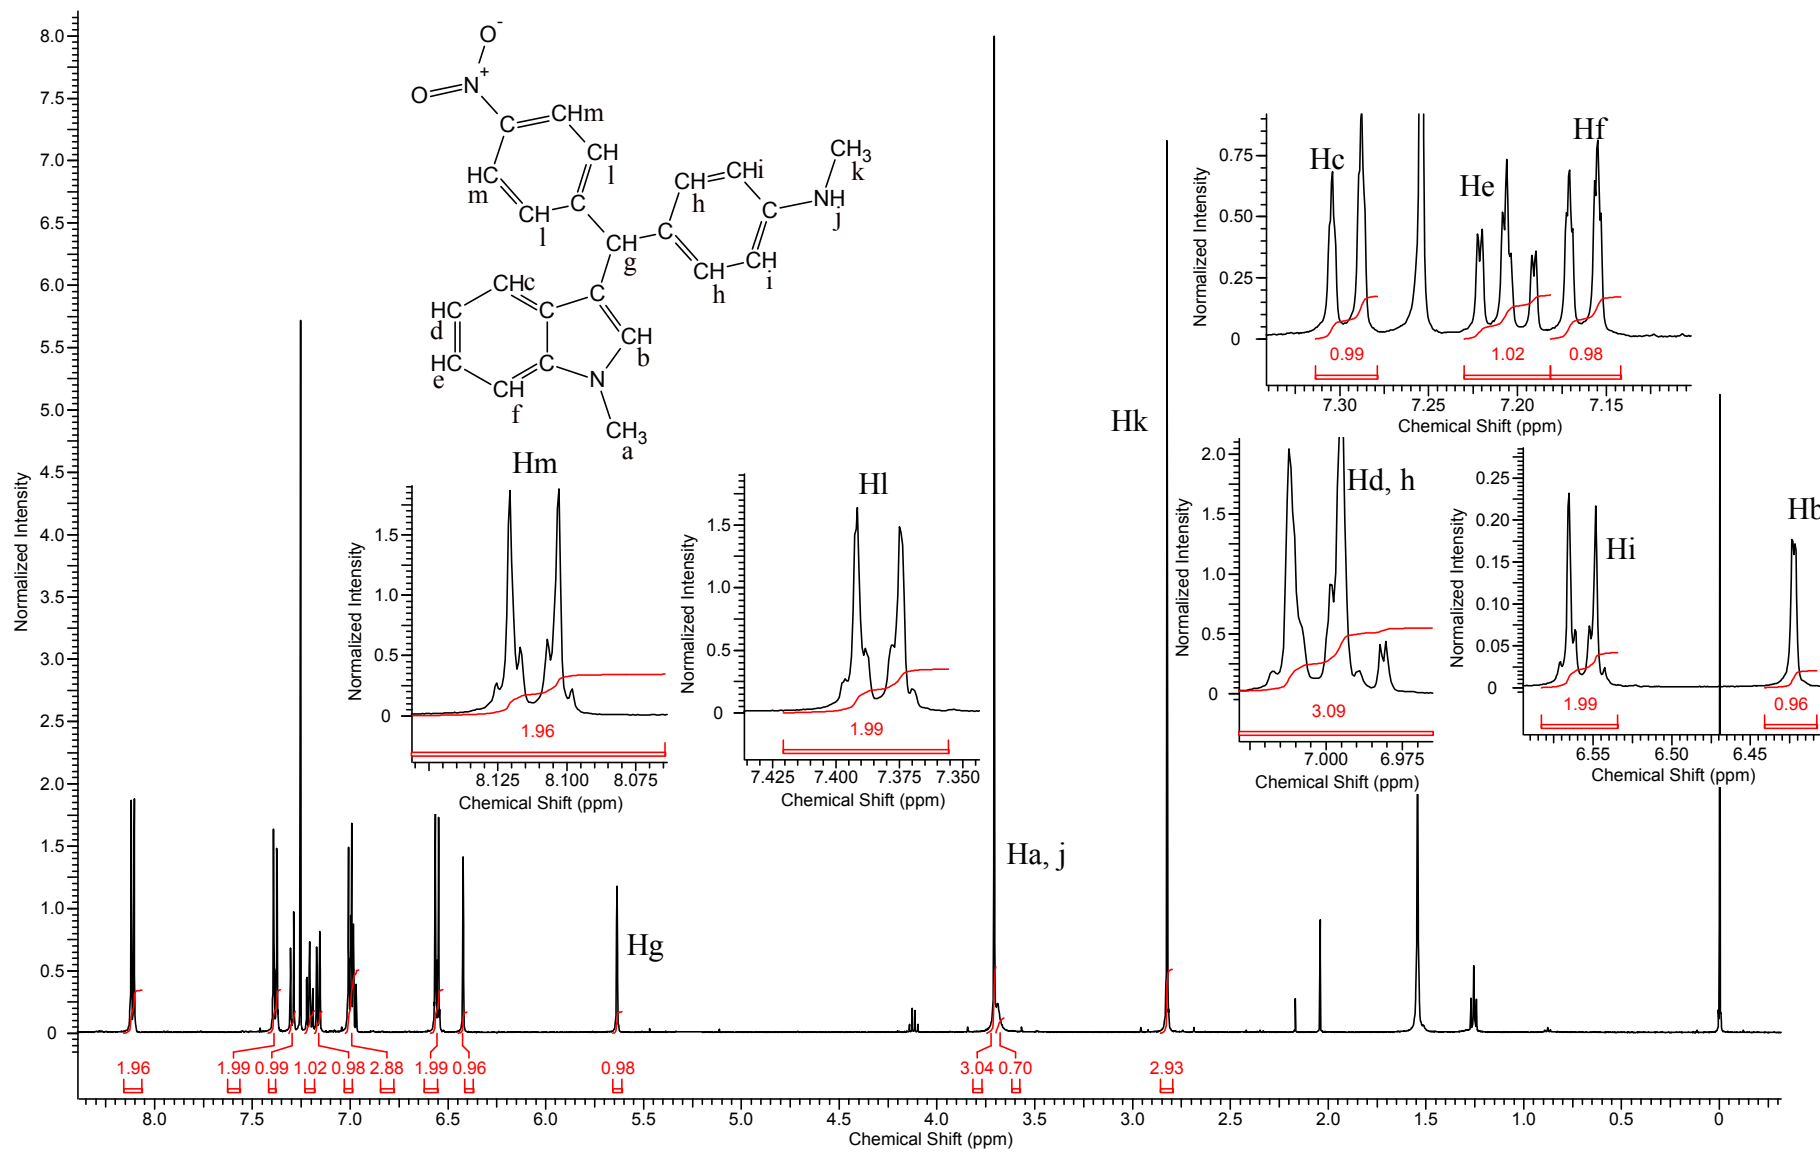

<sup>1</sup>H NMR (500 MHz, CDCl<sub>3</sub>) δ = 8.11 (d, *J* = 8.9 Hz, 2 H), 7.42 (d, *J* = 8.9 Hz, 2 H), 7.30 (d, *J* = 8.2 Hz, 1 H), 7.21 (ddd, *J* = 1.2, 7.0, 7.9 Hz, 1 H), 7.16 (d, *J* = 7.9 Hz, 1 H), 7.03 - 6.96 (m, 3 H), 6.55 (d, *J* = 8.5 Hz, 2 H), 6.42 (d, *J* = 0.9 Hz, 1 H), 5.64 (s, 1 H), 3.71 (s, 3 H), 3.69 (br s, 1 H), 2.82 (s, 3 H).

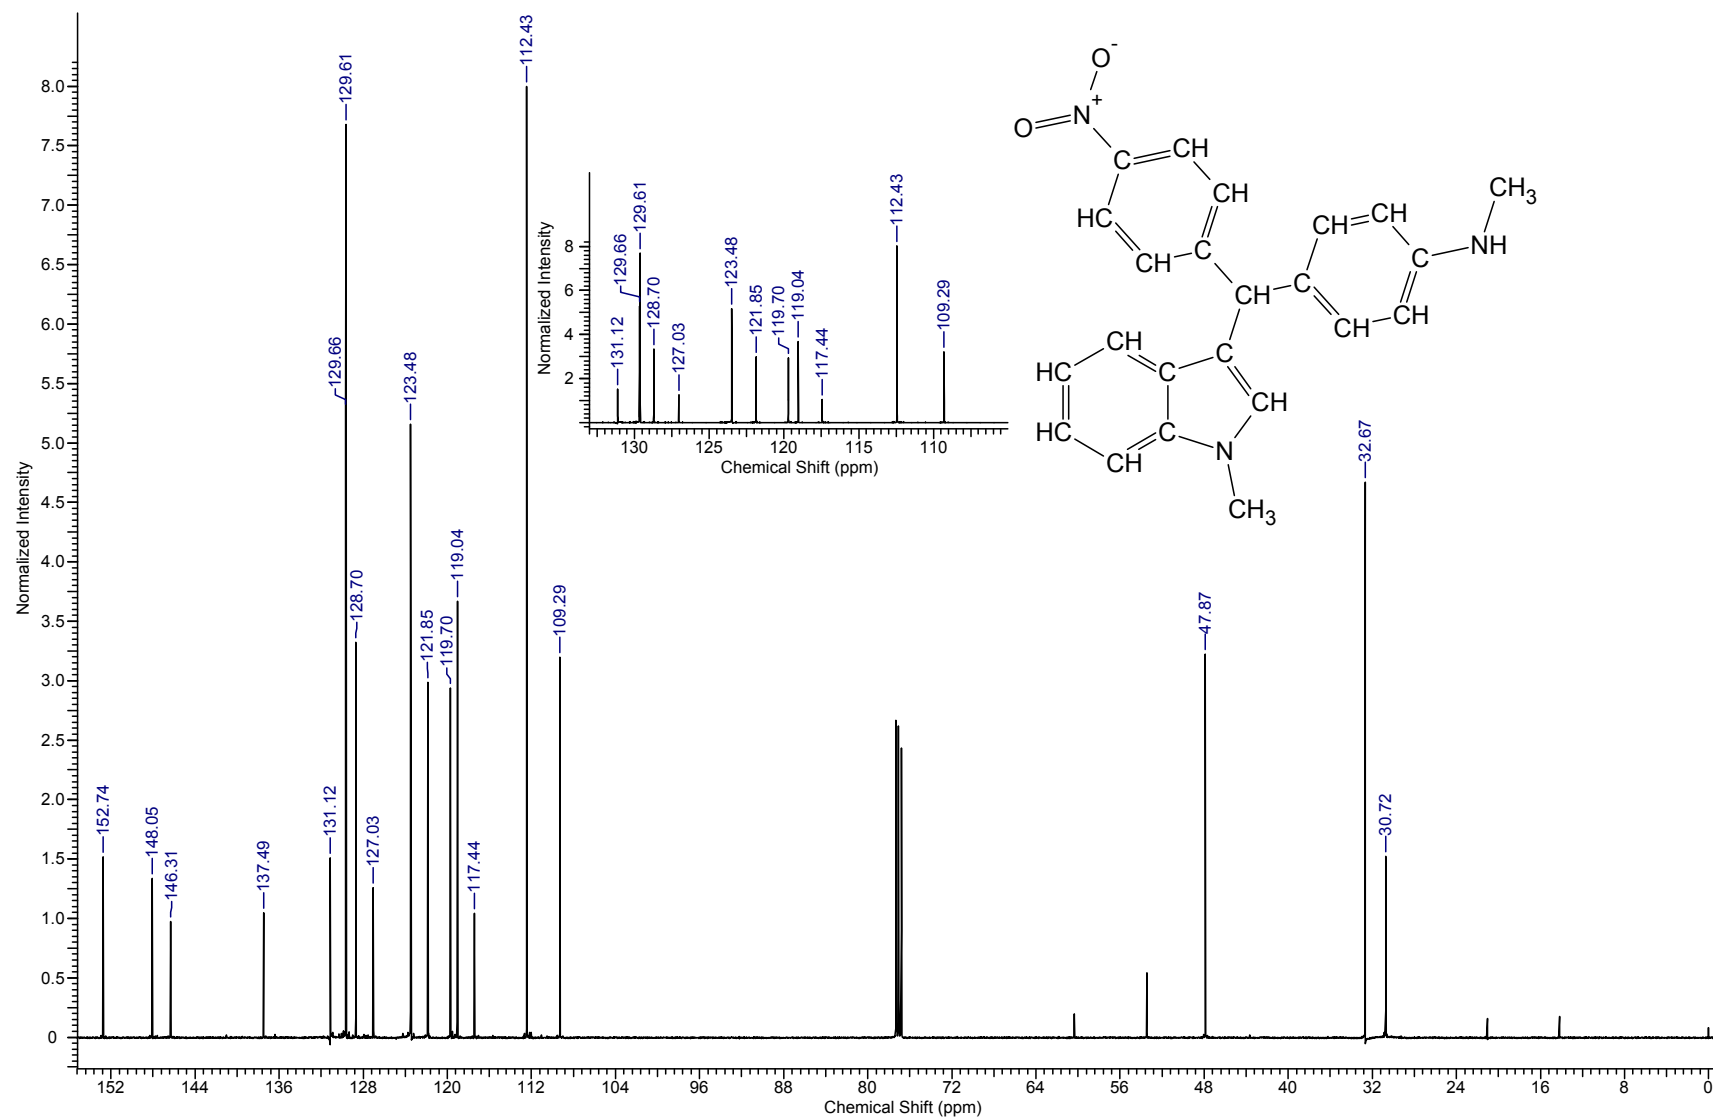

$^{13}\text{C}$  NMR (126 MHz,  $\text{CDCl}_3$ )  $\delta$  = 152.74, 148.05, 146.31, 137.49, 131.12, 129.66, 129.61, 128.70, 127.03, 123.48, 121.85, 119.70, 119.04, 117.44, 112.43, 109.29, 47.87, 32.67, 30.72.

The mass spectrum of this compound was obtained using a direct probe. The following peaks were obtained:

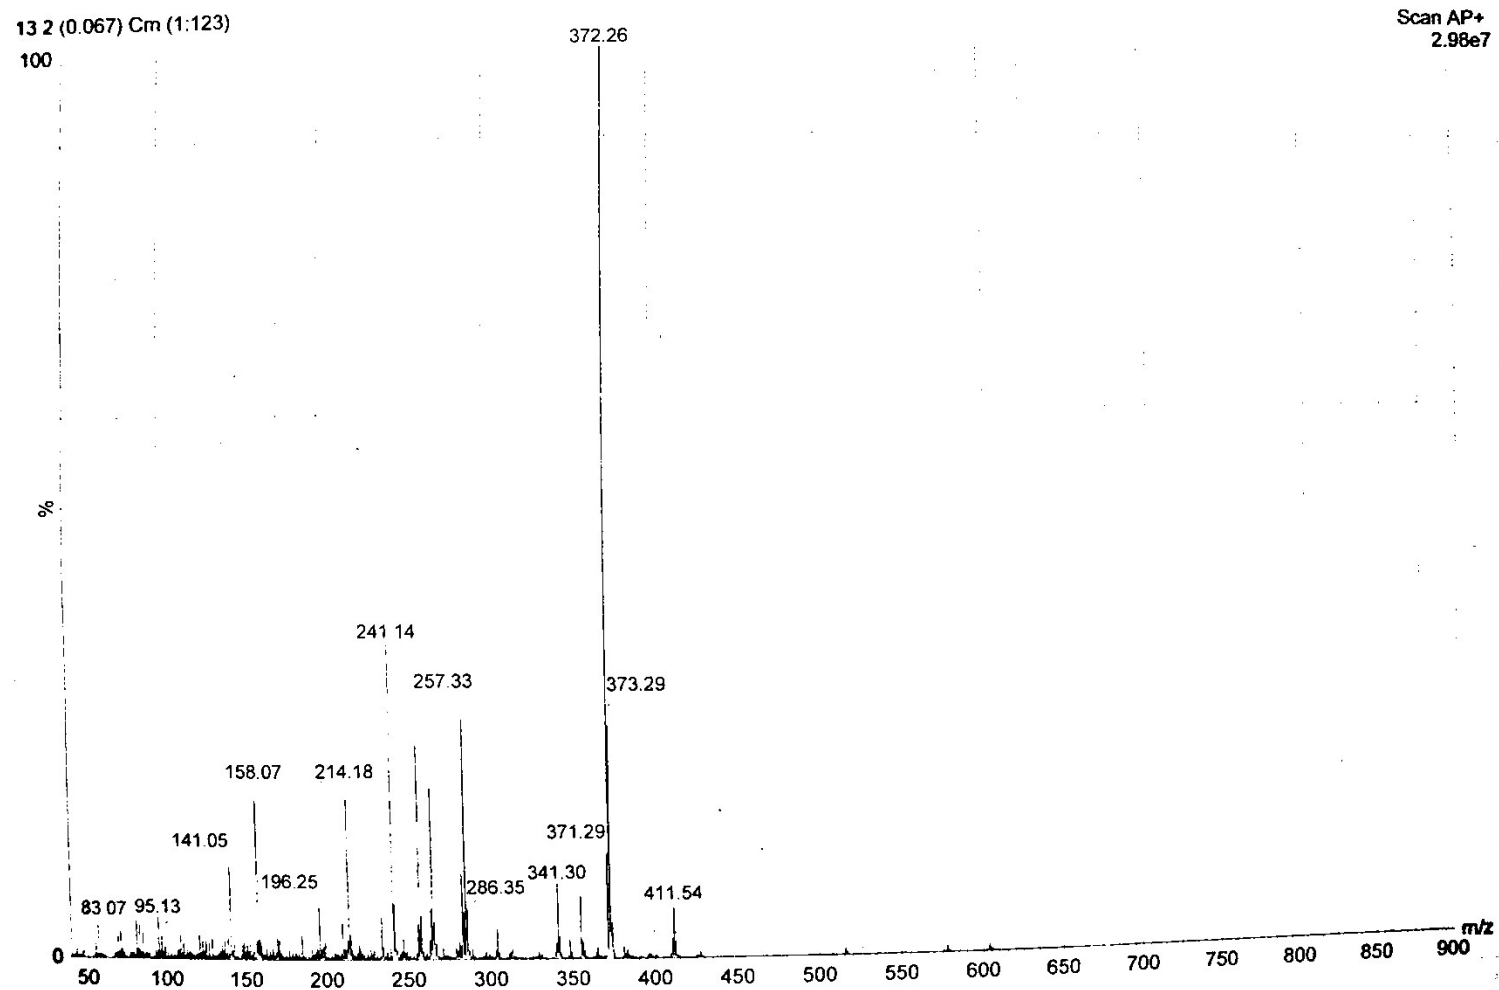

## [6] Side products

### 6.1 Side product obtained from the reaction between 4-hydroxybenzaldehyde (1), indole (2a), *N*-methylaniline (3a): an example of a bis(indolyl)methane derivative

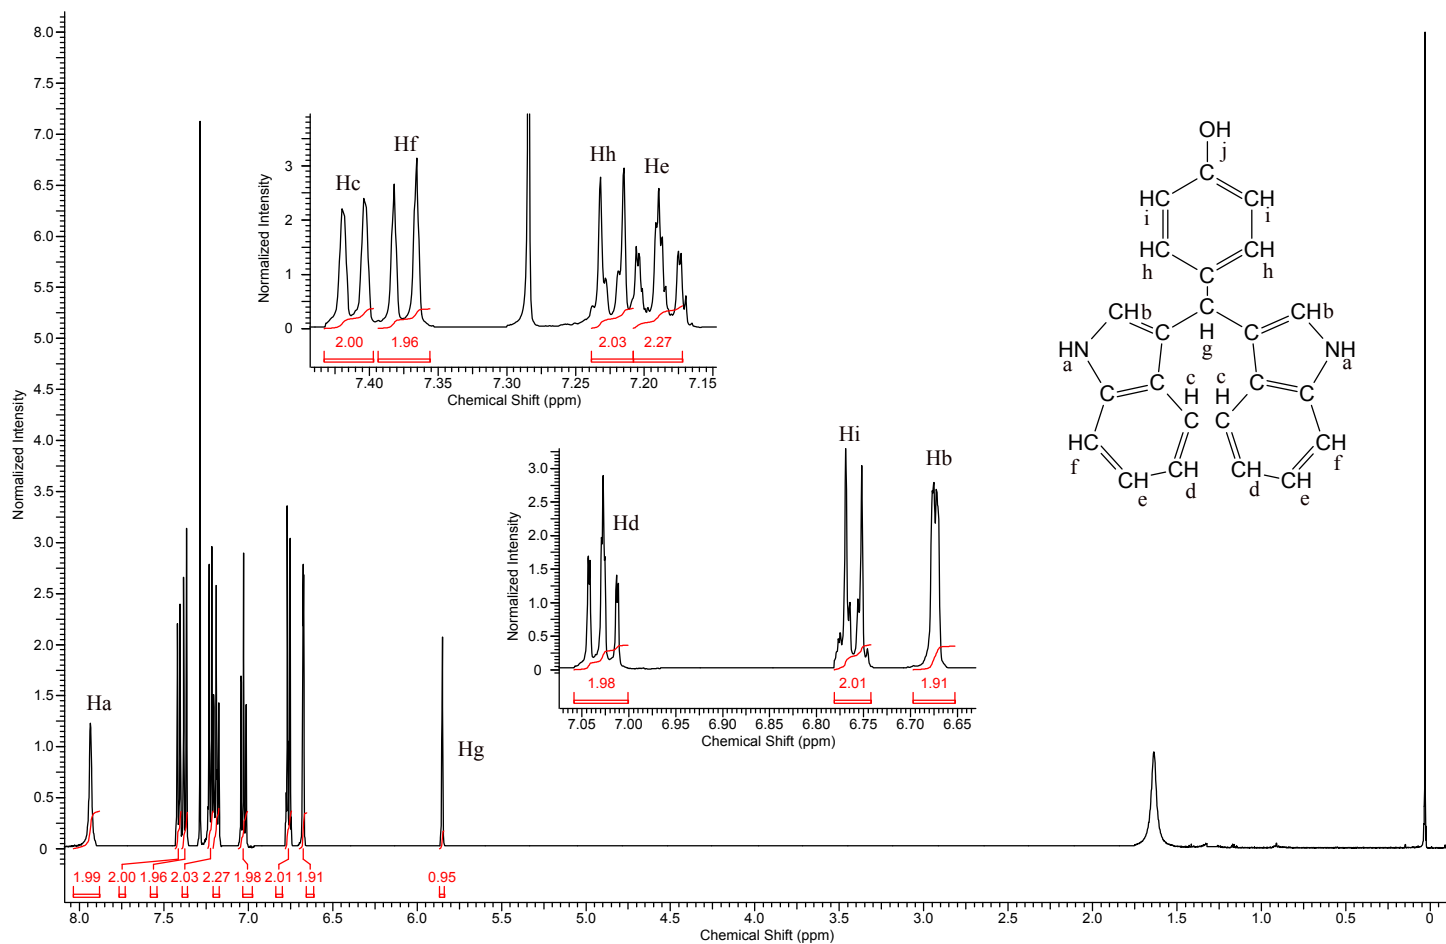

<sup>1</sup>H NMR (500 MHz, CDCl<sub>3</sub>)  $\delta$  = 7.93 (br s, 2 H), 7.41 (d,  $J$  = 8.2 Hz, 2 H), 7.37 (d,  $J$  = 7.9 Hz, 2 H), 7.23 (d,  $J$  = 8.5 Hz, 2 H), 7.19 (ddd,  $J$  = 7.9, 7.0, 0.9 Hz, 2 H), 7.03 (ddd,  $J$  = 8.2, 7.0, 0.9 Hz, 2 H), 6.76 (d,  $J$  = 8.5 Hz, 2 H), 6.67 (d,  $J$  = 1.2 Hz, 2 H), 5.85 (s, 1 H).

## [7] Impure products

### 7.1 Impure product (6t) from reaction between 2-furfural (1t), indole (2a), N-methylaniline (3a)

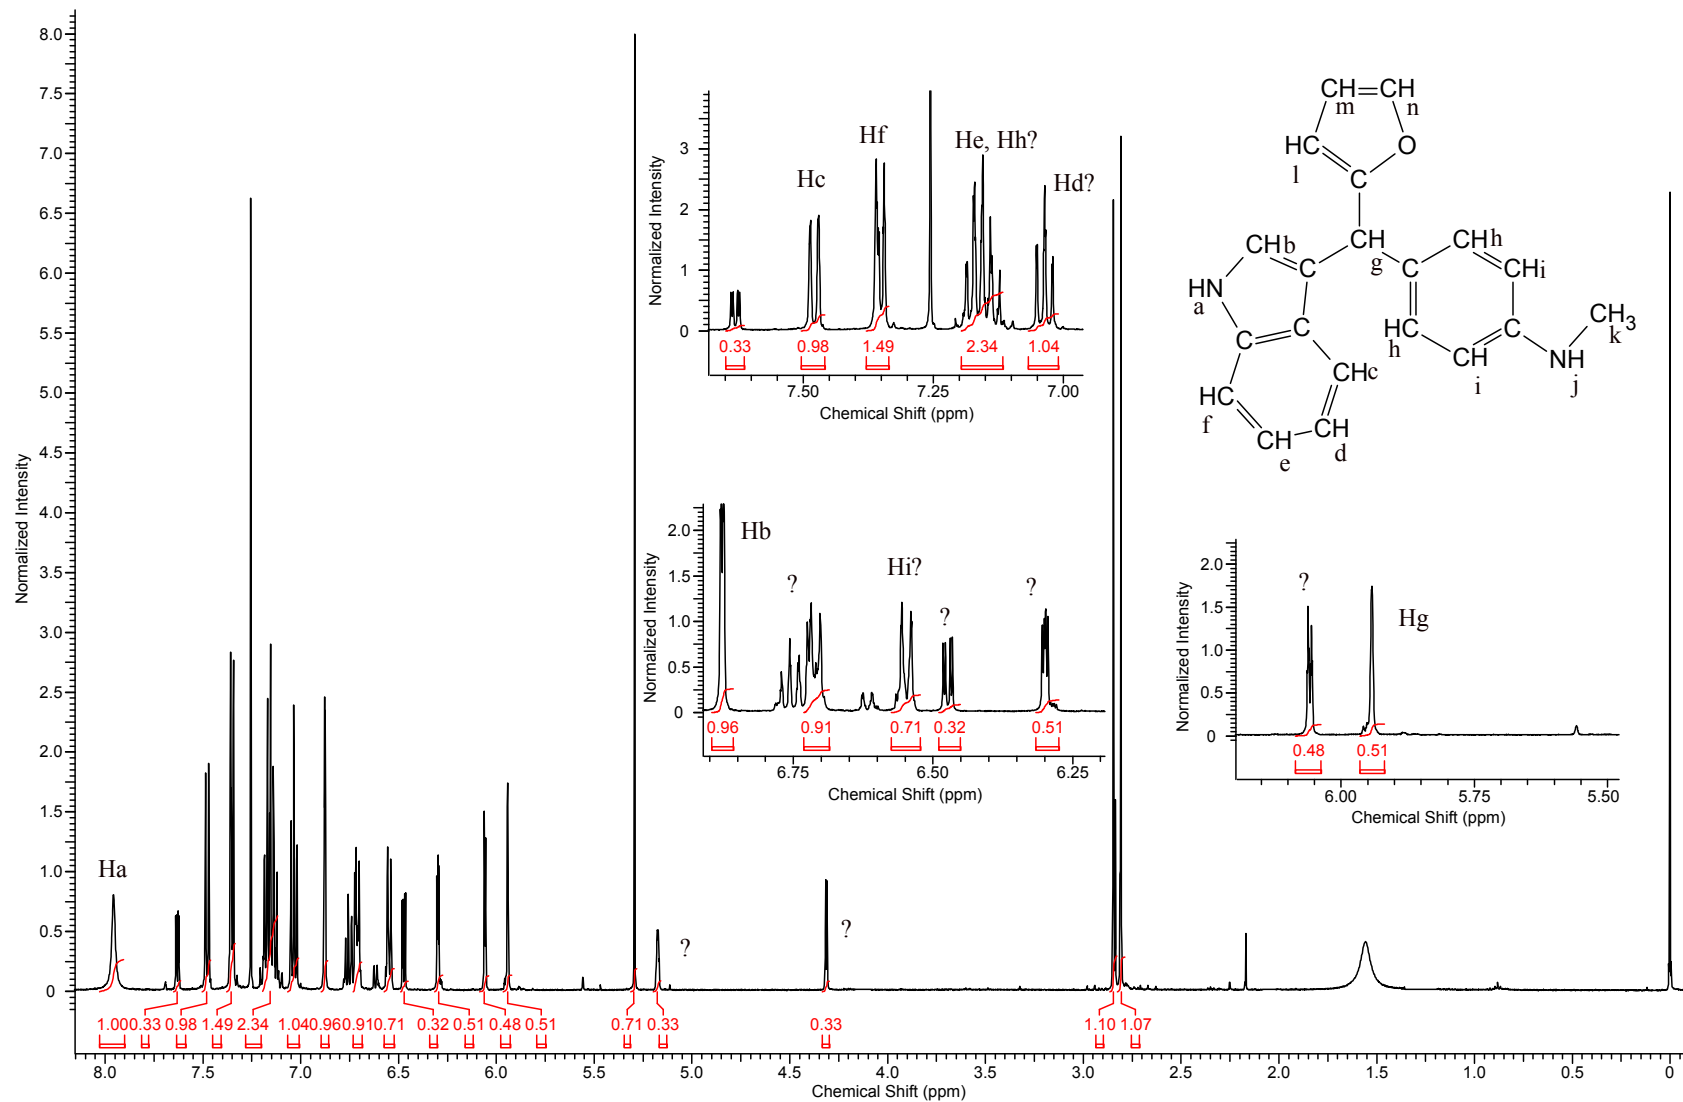



**7.2 Impure product (6zz) from reaction between 4-methylbenzaldehyde (1b), 5-bromoindole (2d), *N*-methylaniline (3a)**

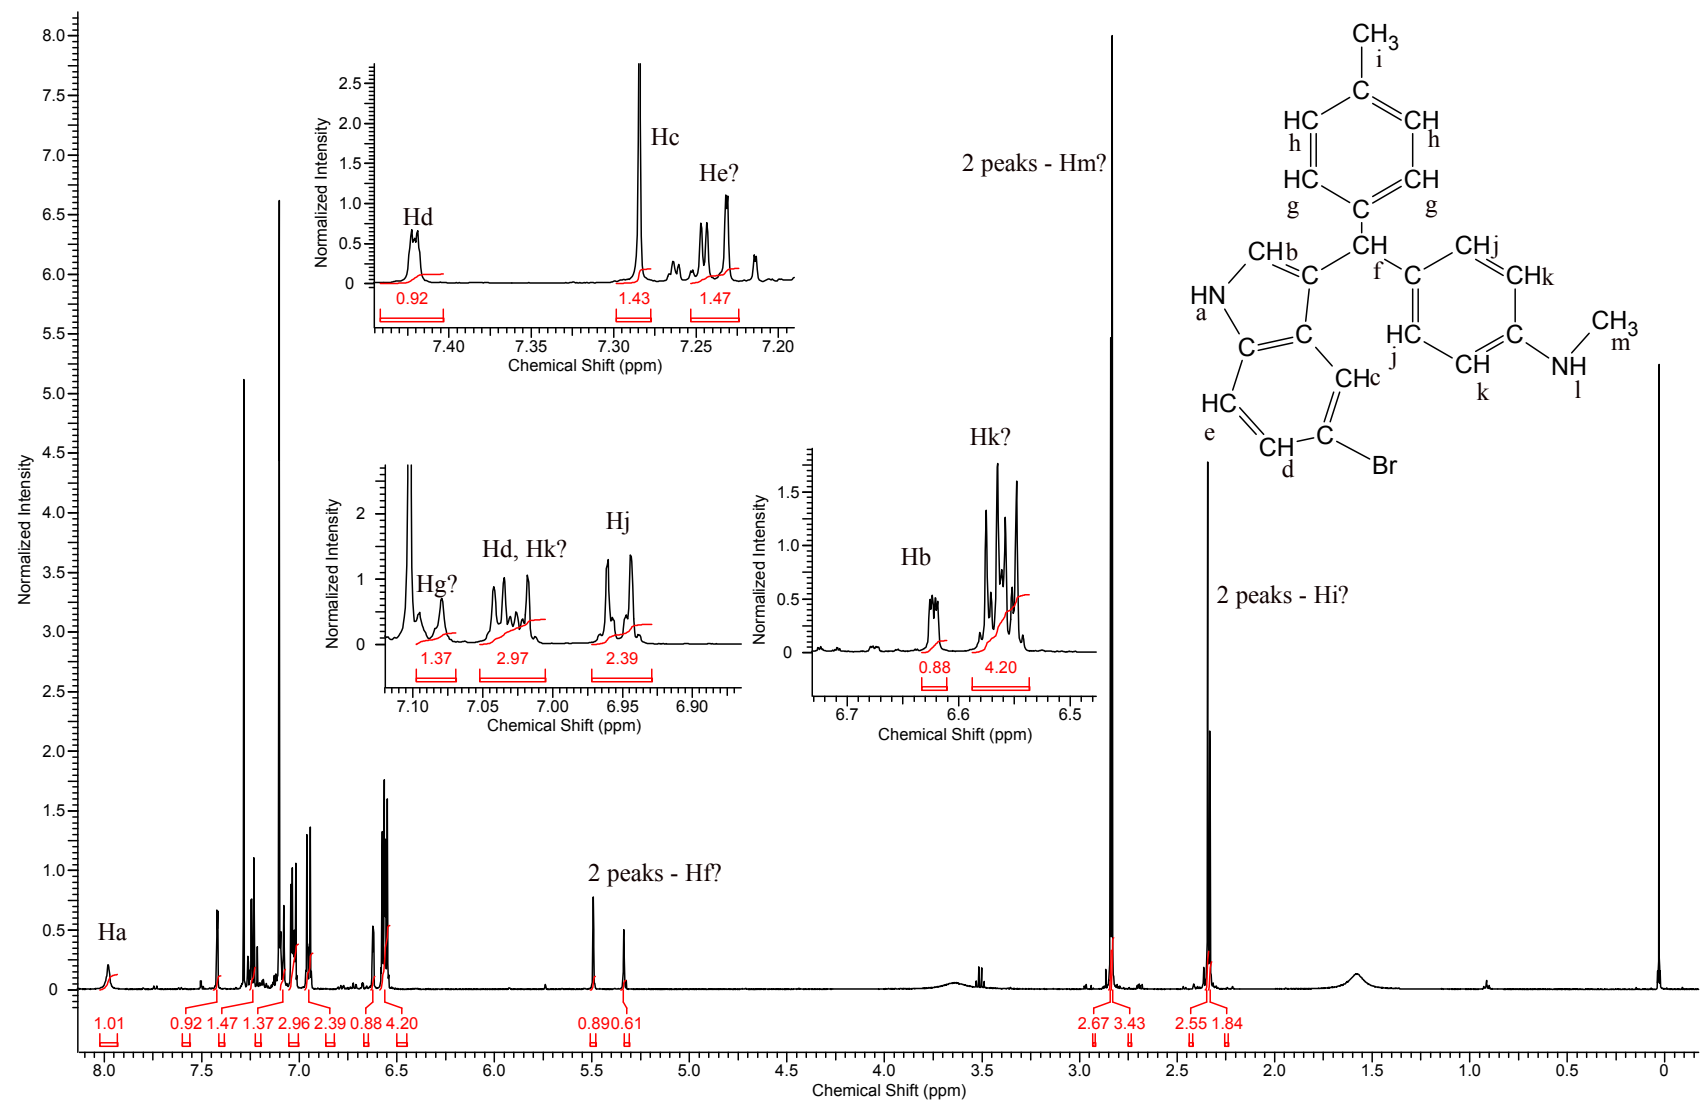

Supplement: c7gc02038d1.pdf [file c7gc02038d1.pdf]
